# Supplementary material for: Epigenetic Modulation of Short Interspersed Nuclear Elements Activity Influences Neural Precursor Cell Proliferation
Source: Research Square preprint supplement (doi:10.21203/rs.3.rs-3647230/v1), 2023-12-08
Supplement: Supplementary file 1 [file 08f3068fcdfe295bad6d8922.xlsx]

## Sheet: Table S1A
Table S1A: List of up-regulated NPC ATAC-Seq peaks (cutoff: FDR < 0.05 & Log2FoldChange >= 0.585), with genomic annotation and repeat annotation (overlap >= 50%).
Chromosome	Start	End	Length	Concentration	Concentration_KO	Concentration_WT	Log2FoldChange	Pvalue	FDR	Event	Annotation	DistanceToTSS	Gene_name	Repeat_chromosome	Repeat_start	Repeat_end	Repeat_length	Repeat_name	Repeat_class	Repeat_family	Overlap_length
chr11	45794460	45794609	150	5.42	6.2	3.65	2.54	5.2e-10	2.05e-08	Up	Distal Intergenic	-13478	F630206G17Rik	chr11	45794446	45794597	152	B3A	SINE	B2	137
chr11	45763254	45763528	275	6.63	7.39	4.95	2.44	2.6e-16	1.96e-14	Up	Distal Intergenic	-44559	F630206G17Rik	chr11	45763070	45763288	219	RLTR1A2_MM	LTR	ERV1	34
chr11	45763254	45763528	275	6.63	7.39	4.95	2.44	2.6e-16	1.96e-14	Up	Distal Intergenic	-44559	F630206G17Rik	chr11	45763286	45763424	139	RLTR1A2_MM	LTR	ERV1	138
chr11	45763254	45763528	275	6.63	7.39	4.95	2.44	2.6e-16	1.96e-14	Up	Distal Intergenic	-44559	F630206G17Rik	chr11	45763514	45763659	146	B3A	SINE	B2	14
chr4	134784823	134784938	116	4.87	5.5	3.72	1.77	6.59e-05	0.000903	Up	Distal Intergenic	-16799	Ldlrap1	chr4	134784806	134784979	174	B3	SINE	B2	115
chr2	121472862	121473068	207	7.2	7.75	6.3	1.45	6.65e-08	1.87e-06	Up	Promoter (<=1kb)	999	Mfap1b	chr2	121472877	121473074	198	B3	SINE	B2	191
chr11	68906405	68906769	365	7.32	7.84	6.48	1.36	5.71e-06	0.000105	Up	Exon (ENSMUST00000138973.1/100034726, exon 2 of 2)	3171	Gm15772	chr11	68906327	68906436	110	B3A	SINE	B2	31
chr13	23260627	23260941	315	7.99	8.74	6.37	2.37	3.14e-19	3.02e-17	Up	Distal Intergenic	11389	Vmn1r223	chr13	23260512	23261009	498	RLTR10C	LTR	ERVK	314
chr7	141612919	141613089	171	6.05	6.42	5.56	0.86	0.00822	0.0472	Up	Promoter (<=1kb)	658	Gm16982	.	.	.	.	.	.	.	.
chr7	141607628	141608169	542	7.84	8.41	6.9	1.51	1.95e-07	5.01e-06	Up	Intron (ENSMUST00000003038.11/11772, intron 6 of 21)	5578	Gm16982	chr7	141607518	141607705	188	B3A	SINE	B2	77
chr7	141607628	141608169	542	7.84	8.41	6.9	1.51	1.95e-07	5.01e-06	Up	Intron (ENSMUST00000003038.11/11772, intron 6 of 21)	5578	Gm16982	chr7	141607749	141607968	220	L1MB2	LINE	L1	219
chr7	141607628	141608169	542	7.84	8.41	6.9	1.51	1.95e-07	5.01e-06	Up	Intron (ENSMUST00000003038.11/11772, intron 6 of 21)	5578	Gm16982	chr7	141607979	141608061	83	RSINE1	SINE	B4	82
chr7	141607628	141608169	542	7.84	8.41	6.9	1.51	1.95e-07	5.01e-06	Up	Intron (ENSMUST00000003038.11/11772, intron 6 of 21)	5578	Gm16982	chr7	141608061	141608243	183	B3A	SINE	B2	108
chr17	6923807	6923894	88	6.91	7.28	6.42	0.86	0.00165	0.0135	Up	Intron (ENSMUST00000231794.1/100037282, intron 2 of 7)	24387	Rsph3b	chr17	6921365	6925849	4485	MuRRS-int	LTR	ERV1	87
chr7	73729928	73730403	476	7.38	7.79	6.83	0.96	0.000464	0.00479	Up	Distal Intergenic	-9899	Fam174b	chr7	73729842	73730209	368	MTEa	LTR	ERVL-MaLR	281
chr18	75599776	75600312	537	10.67	11.13	10	1.13	5.29e-07	1.24e-05	Up	Intron (ENSMUST00000165559.1/269037, intron 6 of 11)	85131	Gm10532	chr18	75599887	75600062	176	RMER1C	Other	Other	175
chr18	75471314	75471457	144	5.02	5.85	2.86	3	4.2e-09	1.45e-07	Up	Intron (ENSMUST00000165559.1/269037, intron 10 of 11)	-43188	Gm10532	chr18	75471290	75471476	187	B3A	SINE	B2	143
chr18	75489175	75489550	376	6.47	6.94	5.77	1.17	1.84e-05	0.000296	Up	Intron (ENSMUST00000165559.1/269037, intron 9 of 11)	-25095	Gm10532	.	.	.	.	.	.	.	.
chr2	6142900	6143198	299	5.54	6.02	4.81	1.21	0.000587	0.00582	Up	Distal Intergenic	10017	Gm10857	chr2	6142858	6143194	337	MTEb	LTR	ERVL-MaLR	294
chr17	13184628	13185120	493	8.33	8.76	7.72	1.04	8.12e-05	0.00108	Up	Distal Intergenic	-19922	Gm10512	chr17	13184861	13184882	22	(TTG)n	Simple_repeat	Simple_repeat	21
chr17	13174162	13174268	107	5.67	6.15	4.95	1.2	0.00131	0.0112	Up	Distal Intergenic	-30774	Gm10512	.	.	.	.	.	.	.	.
chr17	13196598	13196714	117	4.85	5.32	4.17	1.15	0.00845	0.0481	Up	Intron (ENSMUST00000233603.1/ENSMUST00000233603.1, intron 1 of 2)	-8328	Gm10512	chr17	13196529	13196666	138	B1F	SINE	Alu	68
chr18	4812213	4812596	384	8.57	8.95	8.06	0.9	0.000135	0.00168	Up	Promoter (<=1kb)	0	Gm10556	chr18	4812254	4812415	162	(CCTG)n	Simple_repeat	Simple_repeat	161
chr18	4812213	4812596	384	8.57	8.95	8.06	0.9	0.000135	0.00168	Up	Promoter (<=1kb)	0	Gm10556	chr18	4812429	4812590	162	(CCTG)n	Simple_repeat	Simple_repeat	161
chr10	77005102	77005473	372	6.09	6.65	5.17	1.48	5.72e-07	1.33e-05	Up	Intron (ENSMUST00000220294.1/ENSMUST00000220294.1, intron 1 of 4)	-6522	Gm10787	.	.	.	.	.	.	.	.
chr8	65080669	65081130	462	7.32	7.7	6.8	0.9	0.00037	0.00396	Up	Distal Intergenic	-43333	Apela	chr8	65080569	65080718	150	B1_Mus2	SINE	Alu	49
chr13	56352362	56352908	547	7.32	7.88	6.4	1.48	9.33e-06	0.000162	Up	Distal Intergenic	-9992	Gm10782	.	.	.	.	.	.	.	.
chr13	56372831	56373011	181	5.17	5.8	4.04	1.76	5.73e-05	0.000801	Up	Distal Intergenic	9930	Gm10782	chr13	56372827	56372980	154	B3	SINE	B2	149
chr13	56372831	56373011	181	5.17	5.8	4.04	1.76	5.73e-05	0.000801	Up	Distal Intergenic	9930	Gm10782	chr13	56372987	56373810	824	RMER19B	LTR	ERVK	24
chr4	14898756	14899095	340	6.1	6.54	5.44	1.1	0.000498	0.00507	Up	Intron (ENSMUST00000029875.3/72519, intron 4 of 6)	-30813	Gm11837	.	.	.	.	.	.	.	.
chr2	93456811	93457014	204	5.95	6.36	5.37	0.99	0.00203	0.0159	Up	Intron (ENSMUST00000099693.8/100038525, intron 2 of 4)	3990	Gm10804	chr2	93456865	93457180	316	MTE2b	LTR	ERVL-MaLR	149
chr3	12435860	12435997	138	5.25	5.69	4.61	1.08	0.00702	0.0419	Up	Distal Intergenic	-591501	Gm10745	chr3	12435703	12436093	391	RLTR44B	LTR	ERVK	137
chr6	84404843	84404941	99	4.52	5.14	3.41	1.73	0.000315	0.00345	Up	Distal Intergenic	18897	Gm10445	chr6	84404768	84404955	188	B3A	SINE	B2	98
chr11	116658336	116658520	185	6.89	7.27	6.39	0.88	0.00121	0.0105	Up	Promoter (1-2kb)	1180	Prcd	.	.	.	.	.	.	.	.
chr13	41930912	41931195	284	7.74	8.45	6.26	2.19	2.18e-17	1.81e-15	Up	Distal Intergenic	64996	Gm10790	chr13	41930821	41931310	490	RLTR10C	LTR	ERVK	283
chr4	139179342	139179461	120	4.71	5.59	2.05	3.54	4.03e-10	1.61e-08	Up	Promoter (1-2kb)	1194	Gm16287	chr4	139179324	139179370	47	(TG)n	Simple_repeat	Simple_repeat	28
chr4	139179342	139179461	120	4.71	5.59	2.05	3.54	4.03e-10	1.61e-08	Up	Promoter (1-2kb)	1194	Gm16287	chr4	139179370	139179487	118	B3	SINE	B2	91
chr4	139178040	139178191	152	4.99	5.84	2.7	3.14	5.48e-11	2.46e-09	Up	Promoter (2-3kb)	2464	Gm16287	chr4	139178016	139178069	54	GA-rich	Low_complexity	Low_complexity	29
chr4	139178040	139178191	152	4.99	5.84	2.7	3.14	5.48e-11	2.46e-09	Up	Promoter (2-3kb)	2464	Gm16287	chr4	139178082	139178224	143	B3A	SINE	B2	109
chr11	96436642	96436831	190	4.59	5.23	3.41	1.83	0.000859	0.00794	Up	Distal Intergenic	27716	Gm11529	chr11	96436707	96436824	118	MLT1I	LTR	ERVL-MaLR	117
chr3	146352202	146352574	373	6.75	7.26	5.93	1.33	8.32e-07	1.87e-05	Up	Distal Intergenic	26370	Gm10636	.	.	.	.	.	.	.	.
chr15	10618429	10618535	107	4.92	5.77	2.63	3.14	1.79e-10	7.5e-09	Up	Intron (ENSMUST00000090339.10/75646, intron 3 of 17)	18092	Gm10389	chr15	10618400	10618541	142	B3A	SINE	B2	106
chr16	84972007	84972489	483	7.25	7.63	6.72	0.91	0.000629	0.00615	Up	Promoter (<=1kb)	0	Gm10791	.	.	.	.	.	.	.	.
chr16	27682968	27683282	315	4.94	5.48	4.07	1.41	0.000697	0.00669	Up	Distal Intergenic	-166648	Gm10823	.	.	.	.	.	.	.	.
chr19	43852976	43853073	98	6.1	6.5	5.55	0.95	0.00188	0.015	Up	Intron (ENSMUST00000212396.1/71972, intron 13 of 15)	14173	Gm10768	chr19	43852950	43853149	200	B2_Mm2	SINE	B2	97
chr14	47114289	47114387	99	5.07	5.77	3.68	2.09	2.49e-07	6.25e-06	Up	Promoter (1-2kb)	1684	Gm10371	chr14	47114238	47114421	184	B2_Mm2	SINE	B2	98
chr12	116979042	116979189	148	4.41	4.96	3.49	1.47	0.00268	0.0198	Up	Intron (ENSMUST00000189009.6/19276, intron 11 of 13)	172026	Gm10421	.	.	.	.	.	.	.	.
chr4	142054711	142054812	102	5.26	5.68	4.67	1.01	0.0052	0.0333	Up	Intron (ENSMUST00000036572.3/214359, intron 1 of 2)	-29160	Tmem51os1	chr4	142054746	142054922	177	B3A	SINE	B2	66
chr10	98145891	98146002	112	4.42	5.03	3.35	1.68	0.000662	0.00641	Up	Distal Intergenic	-178801	Gm10754	chr10	98145834	98146039	206	B3	SINE	B2	111
chr8	87329458	87329638	181	4.7	5.35	3.49	1.86	2.06e-05	0.000327	Up	Distal Intergenic	-129608	Gm10637	.	.	.	.	.	.	.	.
chr8	87091959	87092088	130	6.89	7.4	6.08	1.32	1.93e-05	0.000308	Up	Distal Intergenic	107751	Gm10637	chr8	87091852	87092067	216	(CTCTG)n	Simple_repeat	Simple_repeat	108
chr8	87091959	87092088	130	6.89	7.4	6.08	1.32	1.93e-05	0.000308	Up	Distal Intergenic	107751	Gm10637	chr8	87092087	87092236	150	B4	SINE	B4	1
chr8	87128671	87128893	223	5.25	5.77	4.43	1.34	0.00211	0.0165	Up	Intron (ENSMUST00000183611.1/ENSMUST00000183611.1, intron 2 of 7)	70946	Gm10637	.	.	.	.	.	.	.	.
chr12	100296868	100297103	236	6.33	6.89	5.43	1.46	1.38e-05	0.00023	Up	Exon (ENSMUST00000223300.1/100038713, exon 4 of 4)	6583	Gm10432	chr12	100296895	100297240	346	ORR1F	LTR	ERVL-MaLR	208
chr12	100254592	100254864	273	5.74	6.14	5.2	0.94	0.0047	0.0307	Up	Distal Intergenic	-21745	Gm10432	chr12	100254478	100254651	174	MIR	SINE	MIR	59
chr12	100254592	100254864	273	5.74	6.14	5.2	0.94	0.0047	0.0307	Up	Distal Intergenic	-21745	Gm10432	chr12	100254700	100254778	79	L2b	LINE	L2	78
chr6	72623773	72624025	253	6.27	6.7	5.66	1.04	0.000125	0.00156	Up	Downstream (2-3kb)	-5263	Gm15401	chr6	72623739	72623934	196	ID_B1	SINE	B4	161
chr6	72623773	72624025	253	6.27	6.7	5.66	1.04	0.000125	0.00156	Up	Downstream (2-3kb)	-5263	Gm15401	chr6	72623940	72623966	27	(TTTG)n	Simple_repeat	Simple_repeat	26
chr6	72623773	72624025	253	6.27	6.7	5.66	1.04	0.000125	0.00156	Up	Downstream (2-3kb)	-5263	Gm15401	chr6	72623966	72624104	139	B1_Mus2	SINE	Alu	59
chr6	72644712	72644852	141	5.3	5.85	4.39	1.46	8.82e-05	0.00116	Up	Intron (ENSMUST00000069536.11/21415, intron 4 of 11)	8459	Gm15401	.	.	.	.	.	.	.	.
chr11	112941703	112942073	371	5.64	6.04	5.09	0.95	0.00586	0.0364	Up	Distal Intergenic	-142695	Gm11681	chr11	112941645	112941711	67	RSINE1	SINE	B4	8
chr10	22410496	22411213	718	11.07	11.55	10.35	1.2	1.26e-05	0.000211	Up	Distal Intergenic	7613	Gm10825	chr10	22410667	22410947	281	RLTR45	LTR	ERVK	280
chr10	22410496	22411213	718	11.07	11.55	10.35	1.2	1.26e-05	0.000211	Up	Distal Intergenic	7613	Gm10825	chr10	22410947	22411381	435	MMERGLN_LTR	LTR	ERV1	266
chr10	22413725	22414274	550	11.22	11.54	10.82	0.72	0.00146	0.0122	Up	Distal Intergenic	10842	Gm10825	.	.	.	.	.	.	.	.
chr10	22402379	22403672	1294	10.92	11.34	10.32	1.02	1.49e-05	0.000245	Up	Promoter (<=1kb)	0	Gm10825	chr10	22402122	22402515	394	ORR1B1	LTR	ERVL-MaLR	136
chr10	22392892	22393570	679	11.32	11.61	10.95	0.66	0.00341	0.0239	Up	Distal Intergenic	-9313	Gm10825	.	.	.	.	.	.	.	.
chr10	22390554	22390714	161	7.25	7.7	6.6	1.09	0.000858	0.00793	Up	Distal Intergenic	-12169	Gm10825	chr10	22390427	22390892	466	RLTR45	LTR	ERVK	160
chr10	22471890	22472203	314	7.24	7.76	6.41	1.35	7.03e-08	1.97e-06	Up	Distal Intergenic	69007	Gm10825	chr10	22471693	22471892	200	ID_B1	SINE	B4	2
chr10	22471890	22472203	314	7.24	7.76	6.41	1.35	7.03e-08	1.97e-06	Up	Distal Intergenic	69007	Gm10825	chr10	22472018	22472062	45	GA-rich	Low_complexity	Low_complexity	44
chr10	22471890	22472203	314	7.24	7.76	6.41	1.35	7.03e-08	1.97e-06	Up	Distal Intergenic	69007	Gm10825	chr10	22472066	22472221	156	B3	SINE	B2	137
chr10	22460407	22460662	256	7.07	7.72	5.89	1.83	3.96e-12	2.03e-10	Up	Distal Intergenic	57524	Gm10825	chr10	22460472	22460833	362	MTEa	LTR	ERVL-MaLR	190
chr14	6895612	6895745	134	6.17	6.82	4.94	1.88	1.67e-10	7.01e-09	Up	Distal Intergenic	126854	Gm10406	chr14	6895289	6895779	491	IAPLTR2_Mm	LTR	ERVK	133
chr17	34383255	34383457	203	5.26	6.1	3.04	3.06	2.92e-12	1.52e-10	Up	Intron (ENSMUST00000080254.5/100038862, intron 8 of 9)	6123	Btnl1	chr17	34383287	34383493	207	B3	SINE	B2	170
chr5	26071621	26071805	185	7.49	8.22	5.95	2.28	1.69e-16	1.3e-14	Up	Distal Intergenic	17486	Gm10471	chr5	26071472	26071903	432	RLTR10C	LTR	ERVK	184
chr5	26074907	26075120	214	7.34	8.06	5.87	2.19	4.66e-14	2.9e-12	Up	Distal Intergenic	14171	Gm10471	chr5	26074764	26075195	432	RLTR10C	LTR	ERVK	213
chr12	44245169	44245623	455	6.31	6.77	5.63	1.14	0.000491	0.00501	Up	Intron (ENSMUST00000122902.7/67452, intron 3 of 12)	23424	Gm2027	chr12	44245052	44245352	301	MTE2b	LTR	ERVL-MaLR	183
chr12	44245169	44245623	455	6.31	6.77	5.63	1.14	0.000491	0.00501	Up	Intron (ENSMUST00000122902.7/67452, intron 3 of 12)	23424	Gm2027	chr12	44245362	44245707	346	MTE2a	LTR	ERVL-MaLR	261
chr9	83688051	83688530	480	8.57	9.03	7.9	1.13	9.28e-05	0.00121	Up	Distal Intergenic	-2945	Gm2109	chr9	83688071	83688726	656	(CTAGGG)n	Simple_repeat	Simple_repeat	459
chr7	84521382	84521651	270	6.68	7.06	6.15	0.91	0.000321	0.0035	Up	Distal Intergenic	-7303	Gm2115	.	.	.	.	.	.	.	.
chr14	26033682	26033782	101	5.83	6.5	4.57	1.92	3.36e-07	8.22e-06	Up	Intron (ENSMUST00000184915.7/100039246, intron 1 of 3)	8892	Plac9b	chr14	26033663	26033841	179	B3A	SINE	B2	100
chr12	88166730	88166932	203	7.19	7.77	6.2	1.57	0.00643	0.0392	Up	Distal Intergenic	14842	Gm10436	.	.	.	.	.	.	.	.
chr6	147173134	147173530	397	8.41	9.18	6.67	2.5	3.57e-16	2.66e-14	Up	Exon (ENSMUST00000120252.1/ENSMUST00000120252.1, exon 1 of 4)	-6714	E330012B07Rik	chr6	147173123	147173414	292	IAP1-MM_LTR	LTR	ERVK	280
chr6	147170316	147170596	281	8.27	8.89	7.18	1.71	2.75e-11	1.28e-09	Up	Distal Intergenic	-9648	E330012B07Rik	chr6	147170191	147170483	293	IAP1-MM_LTR	LTR	ERVK	167
chr6	147170316	147170596	281	8.27	8.89	7.18	1.71	2.75e-11	1.28e-09	Up	Distal Intergenic	-9648	E330012B07Rik	chr6	147170483	147171476	994	IAP1-MM_I-int	LTR	ERVK	113
chr9	88674276	88674518	243	6.43	6.93	5.67	1.26	8.98e-05	0.00118	Up	Distal Intergenic	41692	Mthfsl	chr9	88673794	88674920	1127	ERVB4_1B-I_MM-int	LTR	ERVK	242
chr7	94431530	94431881	352	5.75	6.18	5.14	1.04	0.00587	0.0365	Up	Intron (ENSMUST00000206579.1/ENSMUST00000206579.1, intron 2 of 2)	-1247354	Gm15501	.	.	.	.	.	.	.	.
chr7	93336510	93336737	228	6.05	6.64	5.06	1.58	4.77e-07	1.13e-05	Up	Distal Intergenic	-152334	Gm15501	.	.	.	.	.	.	.	.
chr7	94385539	94385979	441	9.23	10.04	7.2	2.84	2.93e-39	1.47e-36	Up	Intron (ENSMUST00000206579.1/ENSMUST00000206579.1, intron 2 of 2)	-1201363	Gm15501	chr7	94385520	94385877	358	RLTR10C	LTR	ERVK	338
chr7	94385539	94385979	441	9.23	10.04	7.2	2.84	2.93e-39	1.47e-36	Up	Intron (ENSMUST00000206579.1/ENSMUST00000206579.1, intron 2 of 2)	-1201363	Gm15501	chr7	94385877	94387266	1390	L1_Mus3	LINE	L1	102
chr7	93795332	93795481	150	4.49	5.21	2.95	2.26	4.65e-06	8.73e-05	Up	Distal Intergenic	-611156	Gm15501	.	.	.	.	.	.	.	.
chr10	77814788	77815429	642	10.19	10.65	9.51	1.15	1.43e-06	3.05e-05	Up	Promoter (<=1kb)	106	Gm2696	.	.	.	.	.	.	.	.
chr10	77811207	77811737	531	9.74	10.26	8.9	1.36	3.91e-08	1.15e-06	Up	Exon (ENSMUST00000095491.4/ENSMUST00000095491.4, exon 1 of 1)	-2945	Gm2696	.	.	.	.	.	.	.	.
chr13	107024332	107024553	222	8.99	9.83	6.69	3.14	1.13e-34	3.8e-32	Up	Promoter (1-2kb)	1289	3830408C21Rik	chr13	107024225	107024724	500	RLTR10C	LTR	ERVK	221
chr13	107105657	107105777	121	4.56	5.24	3.23	2.02	8.64e-06	0.000151	Up	Distal Intergenic	72777	3830408C21Rik	chr13	107105301	107105744	444	L1MB2	LINE	L1	87
chr8	88039486	88039645	160	4.45	4.93	3.74	1.19	0.00728	0.043	Up	Distal Intergenic	31165	Gm2716	chr8	88039234	88039767	534	RLTR12B	LTR	ERVK	159
chr8	88033070	88033323	254	5.02	5.75	3.47	2.27	1.84e-06	3.82e-05	Up	Distal Intergenic	37487	Gm2716	chr8	88033142	88033341	200	B3	SINE	B2	181
chr12	105398649	105399073	425	7.08	7.8	5.57	2.23	1.42e-12	7.64e-11	Up	Intron (ENSMUST00000222380.1/100040339, intron 1 of 2)	4687	Gm2721	.	.	.	.	.	.	.	.
chr12	105398213	105398480	268	5.93	6.67	4.29	2.39	1.06e-08	3.42e-07	Up	Intron (ENSMUST00000222380.1/100040339, intron 1 of 2)	5280	Gm2721	chr12	105398187	105398239	53	(CA)n	Simple_repeat	Simple_repeat	26
chr12	105394890	105395101	212	5.02	5.68	3.77	1.91	9.48e-06	0.000164	Up	Exon (ENSMUST00000222380.1/100040339, exon 3 of 3)	8659	Gm2721	chr12	105394871	105394990	120	L2a	LINE	L2	100
chr13	53426582	53426824	243	7.46	7.77	7.06	0.72	0.00597	0.037	Up	Intron (ENSMUST00000201658.3/100040421, intron 4 of 7)	31254	Gm2762	.	.	.	.	.	.	.	.
chr17	6571193	6571370	178	6.87	7.55	5.56	1.99	1.11e-10	4.75e-09	Up	Intron (ENSMUST00000231697.1/ENSMUST00000231697.1, intron 2 of 7)	-30301	Dynlt1f	chr17	6571120	6571550	431	MMERGLN_LTR	LTR	ERV1	177
chr4	45622093	45622291	199	4.87	5.6	3.34	2.27	2.45e-07	6.15e-06	Up	Distal Intergenic	-17453	Gm12408	chr4	45622072	45622239	168	B3	SINE	B2	146
chr4	45622093	45622291	199	4.87	5.6	3.34	2.27	2.45e-07	6.15e-06	Up	Distal Intergenic	-17453	Gm12408	chr4	45622241	45622414	174	B3	SINE	B2	50
chr17	6605441	6605549	109	7.36	7.69	6.94	0.75	0.0029	0.0211	Up	Intron (ENSMUST00000092966.4/100040531, intron 2 of 4)	3637	Dynlt1c	.	.	.	.	.	.	.	.
chr12	109910928	109911487	560	6.8	7.37	5.83	1.53	1.99e-07	5.11e-06	Up	Distal Intergenic	162964	Mirg	chr12	109910898	109910940	43	(TGGA)n	Simple_repeat	Simple_repeat	12
chr12	109749675	109750212	538	8.41	8.83	7.81	1.02	0.000859	0.00793	Up	Promoter (1-2kb)	1711	Mirg	.	.	.	.	.	.	.	.
chr12	109845474	109845886	413	6.97	7.62	5.74	1.88	2.63e-12	1.38e-10	Up	Distal Intergenic	97510	Mirg	chr12	109845869	109845905	37	(CCCCCA)n	Simple_repeat	Simple_repeat	17
chr12	109856393	109856856	464	7.84	8.26	7.24	1.01	0.000173	0.00208	Up	Distal Intergenic	108429	Mirg	chr12	109856182	109856790	609	RMER1A	Other	Other	397
chr12	109856393	109856856	464	7.84	8.26	7.24	1.01	0.000173	0.00208	Up	Distal Intergenic	108429	Mirg	chr12	109856790	109857096	307	(TG)n	Simple_repeat	Simple_repeat	66
chr11	102586863	102586975	113	3.79	4.57	2.01	2.56	8.03e-05	0.00107	Up	Distal Intergenic	-7402	Gm11627	chr11	102586789	102586975	187	B3	SINE	B2	112
chr11	102586863	102586975	113	3.79	4.57	2.01	2.56	8.03e-05	0.00107	Up	Distal Intergenic	-7402	Gm11627	chr11	102586974	102587082	109	PB1D9	SINE	Alu	1
chr3	40510620	40511049	430	6.94	7.4	6.26	1.14	7.64e-05	0.00103	Up	Promoter (<=1kb)	-846	1700017G19Rik	chr3	40510457	40511456	1000	Lx8b	LINE	L1	429
chr3	39705741	39705846	106	4.19	4.97	2.36	2.6	1.69e-05	0.000274	Up	Distal Intergenic	803928	1700017G19Rik	chr3	39705715	39705877	163	B3A	SINE	B2	105
chr3	40491817	40491998	182	5.01	5.84	2.8	3.05	2.46e-10	1.01e-08	Up	Distal Intergenic	17776	1700017G19Rik	chr3	40491686	40491832	147	B3A	SINE	B2	15
chr3	40491817	40491998	182	5.01	5.84	2.8	3.05	2.46e-10	1.01e-08	Up	Distal Intergenic	17776	1700017G19Rik	chr3	40491851	40491879	29	(CA)n	Simple_repeat	Simple_repeat	28
chr3	40491817	40491998	182	5.01	5.84	2.8	3.05	2.46e-10	1.01e-08	Up	Distal Intergenic	17776	1700017G19Rik	chr3	40491900	40492068	169	B3	SINE	B2	98
chr7	45325929	45326059	131	5.14	5.8	3.9	1.9	1.71e-06	3.58e-05	Up	Promoter (<=1kb)	964	Rpl14-ps1	chr7	45325939	45326099	161	B3	SINE	B2	120
chr12	69967267	69967503	237	5.16	5.62	4.5	1.12	0.00197	0.0155	Up	Intron (ENSMUST00000110560.2/100040999, intron 1 of 2)	3858	Gm3086	chr12	69967451	69967610	160	B3A	SINE	B2	52
chr5	94519352	94519641	290	7.85	8.12	7.53	0.59	0.00667	0.0402	Up	Distal Intergenic	-6646	Gm3139	chr5	94518055	94520854	2800	MMVL30-int	LTR	ERV1	289
chr3	34742582	34742892	311	5.37	5.93	4.44	1.49	0.000162	0.00196	Up	Distal Intergenic	-25920	Gm3143	chr3	34742821	34742957	137	L1MDa	LINE	L1	71
chr3	34719164	34719333	170	5.02	5.49	4.31	1.18	0.00253	0.0189	Up	Distal Intergenic	-2502	Gm3143	.	.	.	.	.	.	.	.
chr10	77753593	77753720	128	4.92	5.82	2.11	3.71	1.03e-12	5.61e-11	Up	Intron (ENSMUST00000092366.3/252974, intron 1 of 11)	17605	Gm3238	chr10	77753571	77753747	177	B2_Mm2	SINE	B2	127
chr10	77750369	77751326	958	8.62	9.18	7.7	1.48	8.34e-09	2.74e-07	Up	Exon (ENSMUST00000219969.1/ENSMUST00000219969.1, exon 1 of 1)	19999	Gm3238	.	.	.	.	.	.	.	.
chr10	77770516	77771333	818	9.81	10.37	8.87	1.5	3.7e-11	1.69e-09	Up	Promoter (<=1kb)	0	Gm3238	.	.	.	.	.	.	.	.
chr10	77776257	77776978	722	10.03	10.56	9.17	1.4	2.67e-09	9.49e-08	Up	Exon (ENSMUST00000167669.1/ENSMUST00000167669.1, exon 1 of 1)	-4932	Gm3238	.	.	.	.	.	.	.	.
chr10	77758980	77759691	712	10.24	10.78	9.36	1.42	1.27e-09	4.73e-08	Up	Exon (ENSMUST00000168997.1/ENSMUST00000168997.1, exon 1 of 1)	11634	Gm3238	.	.	.	.	.	.	.	.
chr10	77781843	77782524	682	10.12	10.66	9.25	1.4	2.07e-09	7.49e-08	Up	Exon (ENSMUST00000167358.1/ENSMUST00000167358.1, exon 1 of 1)	-10518	Gm3238	.	.	.	.	.	.	.	.
chr11	6527067	6527263	197	7.8	8.1	7.41	0.69	0.00648	0.0394	Up	Promoter (<=1kb)	-337	Snhg15	chr11	6526892	6527304	413	MMERGLN_LTR	LTR	ERV1	196
chr11	6666774	6666969	196	5.05	5.56	4.26	1.3	0.000761	0.00718	Up	Intron (ENSMUST00000045374.7/56089, intron 1 of 2)	-6541	Gm11978	chr11	6666859	6666962	104	ID_B1	SINE	B4	103
chr11	7180407	7180757	351	7.93	8.23	7.54	0.69	0.00561	0.0353	Up	Downstream (2-3kb)	7812	Cccd201	chr11	7180198	7180981	784	RLTR13B4	LTR	ERVK	350
chr10	77862195	77862702	508	9.6	10.09	8.85	1.24	1.98e-07	5.08e-06	Up	Promoter (<=1kb)	220	Gm3285	chr10	77862251	77862420	170	(CCTG)n	Simple_repeat	Simple_repeat	169
chr17	13320041	13320228	188	7.11	7.45	6.67	0.79	0.00234	0.0179	Up	Distal Intergenic	-34344	Tcp10c	chr17	13320047	13320405	359	RLTR14	LTR	ERV1	181
chr3	10088077	10088319	243	6.24	6.65	5.66	0.99	0.00305	0.0219	Up	Promoter (<=1kb)	0	Gm9833	.	.	.	.	.	.	.	.
chr5	146567203	146567326	124	5.93	6.67	4.31	2.36	2.03e-11	9.61e-10	Up	Distal Intergenic	11039	Gm3402	chr5	146567182	146567381	200	B3	SINE	B2	123
chr17	14974872	14975053	182	8.05	8.66	6.95	1.71	1.07e-12	5.81e-11	Up	Intron (ENSMUST00000231584.1/100041639, intron 1 of 2)	-3415	9030025P20Rik	chr17	14974887	14974910	24	(A)n	Simple_repeat	Simple_repeat	23
chr17	14974872	14975053	182	8.05	8.66	6.95	1.71	1.07e-12	5.81e-11	Up	Intron (ENSMUST00000231584.1/100041639, intron 1 of 2)	-3415	9030025P20Rik	chr17	14974911	14975084	174	B2_Mm2	SINE	B2	142
chr4	58950282	58950600	319	8.36	9.17	6.34	2.84	1.33e-23	1.81e-21	Up	Intron (ENSMUST00000107554.1/100041581, intron 3 of 5)	6654	Zkscan16	chr4	58950201	58950627	427	RLTR10C	LTR	ERVK	318
chr10	40283778	40283940	163	5.27	5.74	4.56	1.17	0.00271	0.02	Up	Distal Intergenic	17636	Amd2	chr10	40283476	40284029	554	RMER19B	LTR	ERVK	162
chr17	15022697	15022889	193	7.82	8.29	7.1	1.19	1.7e-06	3.55e-05	Up	Intron (ENSMUST00000097400.4/100041639, intron 1 of 4)	12362	Gm3435	chr17	15022494	15022967	474	RLTR1B	LTR	ERV1	192
chr17	15006222	15006424	203	8.08	8.69	7.03	1.66	7.75e-12	3.83e-10	Up	Intron (ENSMUST00000097400.4/100041639, intron 2 of 4)	-3752	Gm3435	chr17	15006241	15006264	24	(A)n	Simple_repeat	Simple_repeat	23
chr17	15006222	15006424	203	8.08	8.69	7.03	1.66	7.75e-12	3.83e-10	Up	Intron (ENSMUST00000097400.4/100041639, intron 2 of 4)	-3752	Gm3435	chr17	15006265	15006438	174	B2_Mm2	SINE	B2	159
chr4	60081731	60081879	149	7.02	7.36	6.58	0.78	0.00203	0.016	Up	Distal Intergenic	-11256	Mup7	chr4	60081714	60081827	114	(CAGAGA)n	Simple_repeat	Simple_repeat	96
chr4	60081731	60081879	149	7.02	7.36	6.58	0.78	0.00203	0.016	Up	Distal Intergenic	-11256	Mup7	chr4	60081829	60081870	42	(GGGAGA)n	Simple_repeat	Simple_repeat	41
chr4	60081731	60081879	149	7.02	7.36	6.58	0.78	0.00203	0.016	Up	Distal Intergenic	-11256	Mup7	chr4	60081872	60081937	66	B1_Mus2	SINE	Alu	7
chr4	147809404	147809673	270	7.31	7.66	6.85	0.81	0.00865	0.049	Up	Promoter (<=1kb)	115	Zfp984	.	.	.	.	.	.	.	.
chr4	147809695	147809914	220	7.06	7.38	6.65	0.73	0.00623	0.0383	Up	Promoter (<=1kb)	0	Zfp984	.	.	.	.	.	.	.	.
chr12	76463400	76463840	441	8.45	8.72	8.11	0.61	0.00746	0.0438	Up	Distal Intergenic	18840	Gm10451	chr12	76463402	76463450	49	(CA)n	Simple_repeat	Simple_repeat	48
chr12	76463400	76463840	441	8.45	8.72	8.11	0.61	0.00746	0.0438	Up	Distal Intergenic	18840	Gm10451	chr12	76463714	76463746	33	(CA)n	Simple_repeat	Simple_repeat	32
chr14	41457915	41458069	155	7.08	7.72	5.87	1.85	1.3e-12	6.99e-11	Up	Distal Intergenic	-115142	1700049E17Rik2	chr14	41457741	41458080	340	IAPLTR1a_Mm	LTR	ERVK	154
chr14	41464557	41464700	144	6.85	7.52	5.6	1.91	1.85e-11	8.79e-10	Up	Distal Intergenic	-108511	1700049E17Rik2	chr14	41464401	41464740	340	IAPLTR1a_Mm	LTR	ERVK	143
chr14	46076894	46076977	84	4.17	4.98	2.16	2.81	1.29e-06	2.77e-05	Up	Distal Intergenic	-302437	Gm15217	chr14	46076857	46077059	203	B3	SINE	B2	83
chr13	62296422	62296578	157	7.95	8.26	7.55	0.71	0.00204	0.016	Up	Distal Intergenic	75358	Gm3604	chr13	62296263	62296908	646	RLTR6_Mm	LTR	ERV1	156
chr6	54406263	54406441	179	4.81	5.45	3.62	1.83	4.01e-05	0.000587	Up	Intron (ENSMUST00000145111.7/100042056, intron 1 of 13)	23096	9130019P16Rik	chr6	54406093	54406292	200	RLTR40	LTR	ERVK	29
chr6	54406263	54406441	179	4.81	5.45	3.62	1.83	4.01e-05	0.000587	Up	Intron (ENSMUST00000145111.7/100042056, intron 1 of 13)	23096	9130019P16Rik	chr6	54406304	54406476	173	B3A	SINE	B2	137
chr1	39810559	39810941	383	8.74	9.56	6.65	2.91	3.79e-27	6.69e-25	Up	Distal Intergenic	-5227	Gm3646	chr1	39810437	39811001	565	RLTR10C	LTR	ERVK	382
chr1	39796040	39796951	912	9.36	10.24	6.76	3.48	3.27e-48	2.88e-45	Up	Distal Intergenic	8381	Gm3646	chr1	39794904	39796116	1213	Lx7	LINE	L1	76
chr1	39796040	39796951	912	9.36	10.24	6.76	3.48	3.27e-48	2.88e-45	Up	Distal Intergenic	8381	Gm3646	chr1	39796116	39796538	423	RLTR10C	LTR	ERVK	422
chr1	39796040	39796951	912	9.36	10.24	6.76	3.48	3.27e-48	2.88e-45	Up	Distal Intergenic	8381	Gm3646	chr1	39796538	39796632	95	Lx7	LINE	L1	94
chr1	39796040	39796951	912	9.36	10.24	6.76	3.48	3.27e-48	2.88e-45	Up	Distal Intergenic	8381	Gm3646	chr1	39796632	39797158	527	RMER19C	LTR	ERVK	319
chr12	81235971	81236226	256	5.54	6.09	4.61	1.48	1.87e-05	0.0003	Up	Intron (ENSMUST00000182077.1/100042143, intron 1 of 1)	7687	Gm3693	.	.	.	.	.	.	.	.
chr18	36085580	36085679	100	4.25	5.03	2.44	2.59	3.78e-06	7.28e-05	Up	Intron (ENSMUST00000115713.7/100042150, intron 1 of 9)	-47267	Nrg2	chr18	36085536	36085749	214	B3	SINE	B2	99
chr18	36128161	36128254	94	4.22	5.03	2.24	2.79	4.25e-06	8.07e-05	Up	Intron (ENSMUST00000115713.7/100042150, intron 1 of 9)	68367	Nrg2	chr18	36128097	36128229	133	B3	SINE	B2	68
chr11	6174899	6175062	164	5.65	6.02	5.15	0.88	0.00736	0.0434	Up	Promoter (1-2kb)	-1863	Rps15a-ps6	.	.	.	.	.	.	.	.
chr11	6148352	6148631	280	7.77	8.34	6.8	1.54	4.08e-09	1.41e-07	Up	Intron (ENSMUST00000066496.9/209586, intron 3 of 5)	24405	Rps15a-ps6	chr11	6148293	6148630	338	IAPLTR1a_Mm	LTR	ERVK	278
chr5	64587029	64587191	163	4.6	5.56	0.54	5.02	7.76e-11	3.4e-09	Up	Distal Intergenic	15969	Gm3716	chr5	64586822	64587100	279	MER44B	DNA	TcMar-Tigger	71
chr5	64587029	64587191	163	4.6	5.56	0.54	5.02	7.76e-11	3.4e-09	Up	Distal Intergenic	15969	Gm3716	chr5	64587055	64587255	201	B3	SINE	B2	136
chr5	64586425	64586563	139	4.48	5.29	2.45	2.85	1.18e-06	2.57e-05	Up	Distal Intergenic	16597	Gm3716	chr5	64586046	64586625	580	RMER1A	Other	Other	138
chr9	78256158	78256540	383	7.05	7.37	6.64	0.72	0.00632	0.0387	Up	Promoter (<=1kb)	-589	Gm3776	.	.	.	.	.	.	.	.
chr11	120208969	120209105	137	5.54	6.07	4.68	1.39	4.46e-05	0.000644	Up	Distal Intergenic	-19117	2810410L24Rik	chr11	120208923	120209115	193	B2_Mm2	SINE	B2	136
chr4	42223208	42223373	166	7.21	7.93	5.73	2.2	3.72e-16	2.77e-14	Up	Intron (ENSMUST00000169242.1/ENSMUST00000169242.1, intron 1 of 1)	-32394	Ccl21b	chr4	42220929	42226364	5436	ETnERV-int	LTR	ERVK	165
chr4	42221791	42221922	132	5.66	6.24	4.69	1.55	1.89e-05	0.000302	Up	Intron (ENSMUST00000169242.1/ENSMUST00000169242.1, intron 1 of 1)	-33845	Ccl21b	chr4	42220929	42226364	5436	ETnERV-int	LTR	ERVK	131
chr11	75458770	75458981	212	7.74	8.1	7.28	0.82	0.00275	0.0202	Up	Distal Intergenic	-2558	Mir22hg	.	.	.	.	.	.	.	.
chr7	7926271	7926391	121	7.41	8.04	6.28	1.76	8e-11	3.49e-09	Up	Distal Intergenic	-23776	Vmn2r36	chr7	7923944	7930282	6339	ETnERV-int	LTR	ERVK	120
chr17	22738730	22738981	252	7.26	7.56	6.9	0.66	0.00517	0.0331	Up	Distal Intergenic	78760	Gm16386	.	.	.	.	.	.	.	.
chr17	22728247	22728648	402	5.84	6.28	5.2	1.08	0.00413	0.0278	Up	Distal Intergenic	89093	Gm16386	chr17	22728405	22729077	673	RMER17B	LTR	ERVK	243
chr17	22736458	22736725	268	8.57	8.85	8.21	0.64	0.00538	0.0341	Up	Distal Intergenic	81016	Gm16386	.	.	.	.	.	.	.	.
chr8	32930565	32930705	141	4.71	5.31	3.69	1.61	0.000157	0.0019	Up	Intron (ENSMUST00000132101.7/100042715, intron 2 of 3)	11777	Gm3985	chr8	32930517	32930692	176	B3A	SINE	B2	127
chr8	33115283	33115771	489	7.6	7.99	7.06	0.94	0.00199	0.0157	Up	Distal Intergenic	-165257	Gm3985	chr8	33115621	33115700	80	MIR3	SINE	MIR	79
chr8	33066313	33066461	149	4.72	5.59	2.21	3.38	1.94e-09	7.03e-08	Up	Distal Intergenic	-116287	Gm3985	chr8	33066272	33066457	186	B3	SINE	B2	144
chr2	93051962	93052159	198	5.38	5.79	4.8	0.99	0.00508	0.0326	Up	Distal Intergenic	-5795	Prdm11	chr2	93051613	93052100	488	MTE2a-int	LTR	ERVL-MaLR	138
chr2	93051962	93052159	198	5.38	5.79	4.8	0.99	0.00508	0.0326	Up	Distal Intergenic	-5795	Prdm11	chr2	93052100	93052124	25	(CCTG)n	Simple_repeat	Simple_repeat	24
chr2	93051962	93052159	198	5.38	5.79	4.8	0.99	0.00508	0.0326	Up	Distal Intergenic	-5795	Prdm11	chr2	93052124	93052311	188	MTE2a-int	LTR	ERVL-MaLR	35
chr2	93056420	93056563	144	4.73	5.39	3.49	1.9	4.36e-05	0.000631	Up	Distal Intergenic	-10253	Prdm11	chr2	93056385	93056534	150	B3	SINE	B2	114
chr2	93056420	93056563	144	4.73	5.39	3.49	1.9	4.36e-05	0.000631	Up	Distal Intergenic	-10253	Prdm11	chr2	93056536	93056567	32	(TC)n	Simple_repeat	Simple_repeat	27
chr7	8446536	8446653	118	7.05	7.65	6.02	1.63	3.82e-09	1.33e-07	Up	Distal Intergenic	42422	Vmn2r45	chr7	8444209	8450556	6348	ETnERV-int	LTR	ERVK	117
chr7	7985804	7986013	210	7.54	7.86	7.13	0.73	0.00119	0.0104	Up	Intron (ENSMUST00000173265.1/ENSMUST00000173265.1, intron 1 of 3)	49130	Vmn2r47	chr7	7985450	7985818	369	ORR1D1	LTR	ERVL-MaLR	14
chr7	8716828	8716961	134	7.25	7.91	6.01	1.9	3.39e-12	1.74e-10	Up	Distal Intergenic	108724	Vmn2r47	chr7	8714523	8720860	6338	ETnERV-int	LTR	ERVK	133
chr7	8776587	8776816	230	7.52	7.85	7.09	0.76	0.00156	0.0129	Up	Intron (ENSMUST00000174624.1/ENSMUST00000174624.1, intron 1 of 3)	48869	Vmn2r47	chr7	8776250	8776618	369	ORR1D1	LTR	ERVL-MaLR	31
chr7	7988580	7988836	257	7.37	7.72	6.89	0.83	0.00212	0.0165	Up	Distal Intergenic	46307	Vmn2r47	chr7	7988462	7988723	262	MMERVK10C-int	LTR	ERVK	143
chr7	9792238	9792358	121	6.83	7.17	6.39	0.78	0.00153	0.0127	Up	Intron (ENSMUST00000210174.1/ENSMUST00000210174.1, intron 1 of 4)	-21667	Vmn2r46	chr7	9791903	9792271	369	ORR1D1	LTR	ERVL-MaLR	33
chr7	9456649	9456805	157	7.25	7.93	5.91	2.02	2.43e-13	1.42e-11	Up	Distal Intergenic	44695	Vmn2r46	chr7	9454342	9460683	6342	ETnERV-int	LTR	ERVK	156
chr7	9523162	9523337	176	7.13	7.48	6.66	0.82	0.000567	0.00565	Up	Intron (ENSMUST00000173820.1/ENSMUST00000173820.1, intron 1 of 3)	-21662	Vmn2r46	chr7	9522832	9523200	369	ORR1D1	LTR	ERVL-MaLR	38
chr7	9725731	9725876	146	7.38	8.05	6.06	1.99	8.46e-14	5.15e-12	Up	Distal Intergenic	44695	Vmn2r46	chr7	9723413	9729754	6342	ETnERV-int	LTR	ERVK	145
chr7	20348578	20348672	95	6.64	7.17	5.8	1.37	6.74e-06	0.000122	Up	Distal Intergenic	9088	Vmn1r-ps79	chr7	20344591	20350965	6375	ETnERV-int	LTR	ERVK	94
chr7	22344230	22344316	87	6.61	7.07	5.93	1.14	0.000114	0.00145	Up	Distal Intergenic	9081	Vmn1r-ps79	chr7	22340241	22346614	6374	ETnERV-int	LTR	ERVK	86
chr12	31204171	31204377	207	4.98	5.6	3.85	1.74	1.71e-05	0.000277	Up	Intron (ENSMUST00000218642.1/ENSMUST00000218642.1, intron 21 of 23)	35309	6030469F06Rik	chr12	31204114	31204389	276	L3	LINE	CR1	206
chr11	115034014	115034316	303	7.99	8.75	6.33	2.42	1.57e-20	1.68e-18	Up	Intron (ENSMUST00000100239.2/100043123, intron 2 of 3)	3453	Cd300ld4	chr11	115033898	115034394	497	RLTR10C	LTR	ERVK	302
chr11	115023291	115023559	269	7.95	8.73	6.08	2.65	8.34e-23	1.06e-20	Up	Intron (ENSMUST00000100240.2/100043125, intron 2 of 3)	3453	Cd300ld5	chr11	115023140	115023636	497	RLTR10C	LTR	ERVK	268
chr14	71326717	71327154	438	8.46	8.84	7.94	0.9	0.00287	0.0209	Up	Distal Intergenic	75433	Gm4251	chr14	71326599	71326837	239	B4A	SINE	B4	120
chr14	71326717	71327154	438	8.46	8.84	7.94	0.9	0.00287	0.0209	Up	Distal Intergenic	75433	Gm4251	chr14	71326885	71327041	157	ORR1E	LTR	ERVL-MaLR	156
chr14	71320147	71320718	572	7.13	7.56	6.51	1.05	5.01e-05	0.000713	Up	Distal Intergenic	68863	Gm4251	.	.	.	.	.	.	.	.
chr16	11028059	11028527	469	7.08	7.66	6.1	1.55	2.81e-09	9.93e-08	Up	Intron (ENSMUST00000162323.1/56722, intron 1 of 2)	19161	Gm4262	chr16	11028282	11028661	380	MTD	LTR	ERVL-MaLR	245
chr7	129924501	129924613	113	4.63	5.45	2.5	2.95	1.37e-07	3.62e-06	Up	Distal Intergenic	-37552	Gm4265	chr7	129924453	129924664	212	B3	SINE	B2	112
chr14	75832998	75833259	262	7.07	7.59	6.26	1.32	3.22e-05	0.000485	Up	Distal Intergenic	11705	Gm4285	chr14	75832985	75833034	50	(CA)n	Simple_repeat	Simple_repeat	36
chr14	75832998	75833259	262	7.07	7.59	6.26	1.32	3.22e-05	0.000485	Up	Distal Intergenic	11705	Gm4285	chr14	75833112	75833523	412	RMER17C	LTR	ERVK	147
chr14	75829340	75830152	813	9.05	9.43	8.55	0.88	0.000559	0.00559	Up	Distal Intergenic	14812	Gm4285	chr14	75829428	75829504	77	MER5A	DNA	hAT-Charlie	76
chr14	75829340	75830152	813	9.05	9.43	8.55	0.88	0.000559	0.00559	Up	Distal Intergenic	14812	Gm4285	chr14	75830048	75830229	182	B2_Mm1a	SINE	B2	104
chr7	27773402	27773636	235	6.54	7.21	5.26	1.95	3.01e-10	1.22e-08	Up	Distal Intergenic	7729	Gm10046	chr7	27773345	27773740	396	RLTR10B2	LTR	ERVK	234
chr7	135258077	135258505	429	6.44	6.82	5.91	0.91	0.00141	0.0119	Up	Promoter (<=1kb)	-198	Nps	chr7	135258314	135258459	146	MTD	LTR	ERVL-MaLR	145
chr7	135258077	135258505	429	6.44	6.82	5.91	0.91	0.00141	0.0119	Up	Promoter (<=1kb)	-198	Nps	chr7	135258459	135258785	327	IAPLTR3	LTR	ERVK	46
chr7	135252303	135252585	283	8.91	9.69	7.05	2.64	4.17e-25	6.3e-23	Up	Distal Intergenic	-6118	Nps	chr7	135252220	135252645	426	RLTR10C	LTR	ERVK	282
chr3	95415822	95416186	365	7.77	8.5	6.2	2.3	1.21e-17	1.02e-15	Up	Distal Intergenic	-11485	Gm4349	chr3	95415767	95416264	498	RLTR10C	LTR	ERVK	364
chr3	95427174	95427392	219	5.08	5.6	4.27	1.33	0.00111	0.00977	Up	Promoter (<=1kb)	-279	Gm4349	chr3	95427071	95427567	497	RLTR41	LTR	ERV1	218
chr16	43702157	43702658	502	6.81	7.44	5.67	1.76	3.12e-08	9.3e-07	Up	Intron (ENSMUST00000232267.1/ENSMUST00000232267.1, intron 1 of 2)	-38011	Tigit	chr16	43702454	43702495	42	G-rich	Low_complexity	Low_complexity	41
chr16	43700643	43700966	324	6.25	7.02	4.5	2.52	0.000516	0.00522	Up	Intron (ENSMUST00000232267.1/ENSMUST00000232267.1, intron 1 of 2)	-36497	Tigit	chr16	43700897	43701071	175	Lx7	LINE	L1	69
chr15	95202933	95203038	106	4.01	4.94	0.6	4.34	4.16e-08	1.21e-06	Up	Intron (ENSMUST00000229933.1/54003, intron 20 of 20)	-40539	LOC100043315	chr15	95202855	95203070	216	B3	SINE	B2	105
chr12	21898242	21898368	127	7.66	7.97	7.27	0.7	0.00474	0.0309	Up	Distal Intergenic	258278	Gm4425	.	.	.	.	.	.	.	.
chr12	22467061	22467143	83	7.79	8.28	7.04	1.25	7.82e-06	0.000139	Up	Distal Intergenic	-310415	Gm4425	.	.	.	.	.	.	.	.
chr2	128356423	128356616	194	5.37	5.95	4.37	1.59	0.000257	0.00291	Up	Intron (ENSMUST00000225087.1/100043424, intron 1 of 6)	72277	Morrbid	chr2	128356413	128356457	45	MTEa	LTR	ERVL-MaLR	34
chr2	128356423	128356616	194	5.37	5.95	4.37	1.59	0.000257	0.00291	Up	Intron (ENSMUST00000225087.1/100043424, intron 1 of 6)	72277	Morrbid	chr2	128356565	128356637	73	MTEa	LTR	ERVL-MaLR	51
chr2	128299014	128299338	325	6.41	6.81	5.85	0.96	0.000482	0.00493	Up	Intron (ENSMUST00000225087.1/100043424, intron 2 of 6)	129555	Morrbid	.	.	.	.	.	.	.	.
chr2	128422914	128423085	172	5.4	5.89	4.63	1.26	0.0014	0.0118	Up	Intron (ENSMUST00000225087.1/100043424, intron 1 of 6)	5808	Morrbid	chr2	128422828	128423000	173	B3A	SINE	B2	86
chr2	128291398	128291603	206	5.46	6.18	3.94	2.24	2.59e-08	7.82e-07	Up	Intron (ENSMUST00000225087.1/100043424, intron 2 of 6)	137290	Morrbid	chr2	128291342	128291410	69	ORR1B1	LTR	ERVL-MaLR	12
chr2	128291398	128291603	206	5.46	6.18	3.94	2.24	2.59e-08	7.82e-07	Up	Intron (ENSMUST00000225087.1/100043424, intron 2 of 6)	137290	Morrbid	chr2	128291410	128291467	58	RLTR25B	LTR	ERVK	57
chr2	128291398	128291603	206	5.46	6.18	3.94	2.24	2.59e-08	7.82e-07	Up	Intron (ENSMUST00000225087.1/100043424, intron 2 of 6)	137290	Morrbid	chr2	128291446	128292231	786	RLTR25B	LTR	ERVK	157
chr2	128462759	128462855	97	4.3	5.11	2.28	2.84	5.42e-07	1.27e-05	Up	Intron (ENSMUST00000223654.1/100043424, intron 2 of 2)	-33393	Morrbid	chr2	128462706	128462904	199	B3	SINE	B2	96
chr2	128382552	128382873	322	6.35	6.71	5.87	0.84	0.00622	0.0382	Up	Intron (ENSMUST00000225087.1/100043424, intron 1 of 6)	46020	Morrbid	.	.	.	.	.	.	.	.
chr2	128502119	128502408	290	8.84	9.64	6.86	2.78	7.93e-28	1.48e-25	Up	Promoter (<=1kb)	357	Morrbid	chr2	128502058	128502388	331	RLTR10C	LTR	ERVK	269
chr10	122172667	122172968	302	9.3	10.11	7.29	2.82	1.55e-29	3.4e-27	Up	Distal Intergenic	52967	Gm4489	chr10	122172609	122173027	419	RLTR10C	LTR	ERVK	301
chr14	79209966	79210273	308	7.56	8.16	6.52	1.64	2.28e-09	8.19e-08	Up	Downstream (2-3kb)	-10776	Gm4632	chr14	79209843	79211146	1304	L1VL4	LINE	L1	307
chr3	90175202	90175301	100	5.18	5.82	4	1.82	1.55e-05	0.000254	Up	Intron (ENSMUST00000029548.8/77595, intron 22 of 39)	38000	Rps27rt	chr3	90175150	90175345	196	B2_Mm2	SINE	B2	99
chr9	116380726	116380851	126	5.72	6.19	5.03	1.16	0.000175	0.0021	Up	Distal Intergenic	191546	Gm4668	.	.	.	.	.	.	.	.
chr9	116341115	116341226	112	4.39	5.12	2.82	2.3	1.56e-05	0.000256	Up	Distal Intergenic	151935	Gm4668	chr9	116341053	116341207	155	B3A	SINE	B2	92
chr7	34095717	34095865	149	7.05	7.54	6.28	1.26	2.82e-05	0.00043	Up	Promoter (<=1kb)	286	Scgb1b30	chr7	34095632	34095923	292	IAP1-MM_LTR	LTR	ERVK	148
chr7	34099408	34099628	221	7.31	7.81	6.55	1.27	4.43e-05	0.00064	Up	Intron (ENSMUST00000108083.1/100043868, intron 1 of 2)	3977	Scgb1b30	chr7	34099345	34099636	292	IAP1-MM_LTR	LTR	ERVK	220
chr17	76545704	76545881	178	4.99	5.5	4.21	1.28	0.00387	0.0264	Up	Distal Intergenic	684681	Gm4710	.	.	.	.	.	.	.	.
chr17	76118521	76118745	225	6.15	6.53	5.62	0.91	0.00354	0.0247	Up	Distal Intergenic	257498	Gm4710	chr17	76118227	76119073	847	RLTR13B4	LTR	ERVK	224
chr17	76512682	76512862	181	7.51	8.04	6.68	1.36	4.12e-07	9.86e-06	Up	Distal Intergenic	651659	Gm4710	chr17	76512661	76513013	353	IAPLTR1_Mm	LTR	ERVK	180
chr17	75997980	75998302	323	8.59	9.33	6.99	2.35	2.97e-21	3.37e-19	Up	Distal Intergenic	136957	Gm4710	chr17	75997886	75998382	497	RLTR10C	LTR	ERVK	322
chr17	76519400	76519630	231	7.79	8.31	6.96	1.35	3.77e-07	9.11e-06	Up	Distal Intergenic	658377	Gm4710	chr17	76519441	76519793	353	IAPLTR1_Mm	LTR	ERVK	189
chr17	76519400	76519630	231	7.79	8.31	6.96	1.35	3.77e-07	9.11e-06	Up	Distal Intergenic	658377	Gm4710	chr17	76513013	76519439	6427	IAPEz-int	LTR	ERVK	39
chr17	89466445	89466856	412	6.66	7.38	5.15	2.23	2.26e-14	1.45e-12	Up	Distal Intergenic	87204	Gm4719	chr17	89466363	89467125	763	Lx2B2	LINE	L1	411
chr17	89484018	89484281	264	7.66	8.26	6.63	1.63	3.13e-09	1.1e-07	Up	Distal Intergenic	104777	Gm4719	chr17	89480189	89486565	6377	ETnERV-int	LTR	ERVK	263
chr2	170066874	170067202	329	4.88	5.67	3	2.67	2.76e-09	9.77e-08	Up	Intron (ENSMUST00000123300.2/228911, intron 1 of 1)	3469	A630075F10Rik	chr2	170066810	170067147	338	ORR1E	LTR	ERVL-MaLR	273
chr2	170066874	170067202	329	4.88	5.67	3	2.67	2.76e-09	9.77e-08	Up	Intron (ENSMUST00000123300.2/228911, intron 1 of 1)	3469	A630075F10Rik	chr2	170067150	170067259	110	B4A	SINE	B4	52
chr2	170027950	170028131	182	5.79	6.64	3.47	3.17	4.39e-15	3.01e-13	Up	Intron (ENSMUST00000123300.2/228911, intron 1 of 1)	42540	A630075F10Rik	chr2	170027909	170028120	212	B3	SINE	B2	170
chr2	170045925	170046222	298	6.96	7.84	4.3	3.54	2.98e-25	4.56e-23	Up	Intron (ENSMUST00000123300.2/228911, intron 1 of 1)	24449	A630075F10Rik	chr2	170045993	170046199	207	B3	SINE	B2	206
chr2	170060213	170060327	115	4.6	5.17	3.64	1.53	0.000874	0.00805	Up	Intron (ENSMUST00000123300.2/228911, intron 1 of 1)	10344	A630075F10Rik	chr2	170060184	170060397	214	B3	SINE	B2	114
chr2	170055537	170055793	257	6.02	6.66	4.82	1.85	5.82e-08	1.65e-06	Up	Intron (ENSMUST00000123300.2/228911, intron 1 of 1)	14878	A630075F10Rik	.	.	.	.	.	.	.	.
chr2	173633593	173634356	764	10.33	11.21	7.67	3.54	1.38e-37	6.21e-35	Up	Intron (ENSMUST00000141051.7/100043911, intron 2 of 14)	-4043	Ppp4r1l-ps	.	.	.	.	.	.	.	.
chr2	173587417	173587647	231	5.75	6.34	4.72	1.63	1.24e-06	2.69e-05	Up	Intron (ENSMUST00000141051.7/100043911, intron 12 of 14)	3115	Ppp4r1l-ps	.	.	.	.	.	.	.	.
chr2	173616351	173616764	414	6.26	6.98	4.72	2.26	1.36e-10	5.8e-09	Up	Exon (ENSMUST00000141051.7/100043911, exon 3 of 15)	-7533	Ppp4r1l-ps	.	.	.	.	.	.	.	.
chr19	47831216	47831368	153	4.34	4.96	3.2	1.76	0.00215	0.0167	Up	Intron (ENSMUST00000160247.1/100048534, intron 2 of 37)	5993	Cfap43	chr19	47831199	47831252	54	(TG)n	Simple_repeat	Simple_repeat	36
chr19	47831216	47831368	153	4.34	4.96	3.2	1.76	0.00215	0.0167	Up	Intron (ENSMUST00000160247.1/100048534, intron 2 of 37)	5993	Cfap43	chr19	47831257	47831414	158	B3A	SINE	B2	111
chr9	78395485	78396365	881	9.09	9.51	8.51	1	1.71e-06	3.57e-05	Up	Promoter (<=1kb)	0	Ddx43	.	.	.	.	.	.	.	.
chr4	140814619	140814861	243	5.79	6.21	5.18	1.04	0.005	0.0322	Up	3' UTR	3626	Gm13032	.	.	.	.	.	.	.	.
chr4	151661630	151661804	175	4.04	4.76	2.57	2.19	0.000106	0.00136	Up	Intron (ENSMUST00000169423.8/100072, intron 3 of 24)	199846	Camta1	chr4	151661723	151662026	304	MTE2a	LTR	ERVL-MaLR	81
chr4	151521757	151522062	306	5.57	6.24	4.31	1.92	5.94e-07	1.38e-05	Up	Intron (ENSMUST00000169423.8/100072, intron 4 of 24)	339588	Camta1	chr4	151521955	151522023	69	RLTR20A4	LTR	ERVK	68
chr4	151521757	151522062	306	5.57	6.24	4.31	1.92	5.94e-07	1.38e-05	Up	Intron (ENSMUST00000169423.8/100072, intron 4 of 24)	339588	Camta1	chr4	151522024	151522240	217	IMPB_01	Satellite	Satellite	38
chr4	151275151	151275930	780	9.49	9.83	9.03	0.8	0.00191	0.0152	Up	Intron (ENSMUST00000169423.8/100072, intron 6 of 24)	-135567	Camta1	chr4	151275373	151275573	201	Tigger19a	DNA	TcMar-Tigger	200
chr4	151275151	151275930	780	9.49	9.83	9.03	0.8	0.00191	0.0152	Up	Intron (ENSMUST00000169423.8/100072, intron 6 of 24)	-135567	Camta1	chr4	151275598	151275753	156	MIR3	SINE	MIR	155
chr4	151550471	151550855	385	5.95	6.38	5.34	1.03	0.00186	0.0148	Up	Intron (ENSMUST00000169423.8/100072, intron 4 of 24)	310795	Camta1	chr4	151550819	151550965	147	L2	LINE	L2	36
chr4	151474212	151474513	302	5.26	5.87	4.19	1.68	5.25e-05	0.000742	Up	Intron (ENSMUST00000169423.8/100072, intron 4 of 24)	-334628	Camta1	.	.	.	.	.	.	.	.
chr4	151285609	151285699	91	4.18	4.73	3.29	1.44	0.00853	0.0485	Up	Intron (ENSMUST00000169423.8/100072, intron 6 of 24)	-146025	Camta1	.	.	.	.	.	.	.	.
chr4	151240617	151240711	95	4.56	5.48	1.28	4.2	5.92e-09	2e-07	Up	Intron (ENSMUST00000169423.8/100072, intron 6 of 24)	-101033	Camta1	chr4	151240585	151240788	204	B3	SINE	B2	94
chr4	151407251	151407361	111	4.98	5.87	2.14	3.73	1.52e-12	8.11e-11	Up	Intron (ENSMUST00000169423.8/100072, intron 5 of 24)	-267667	Camta1	chr4	151407206	151407394	189	B3	SINE	B2	110
chr4	151738227	151738677	451	7.36	7.96	6.29	1.67	3.47e-09	1.21e-07	Up	Intron (ENSMUST00000169423.8/100072, intron 3 of 24)	122973	Camta1	chr4	151738173	151738365	193	G-rich	Low_complexity	Low_complexity	138
chr4	151339076	151340066	991	10.34	10.65	9.95	0.7	0.00661	0.04	Up	Intron (ENSMUST00000169423.8/100072, intron 5 of 24)	-199492	Camta1	chr4	151339408	151339440	33	(TG)n	Simple_repeat	Simple_repeat	32
chr4	151339076	151340066	991	10.34	10.65	9.95	0.7	0.00661	0.04	Up	Intron (ENSMUST00000169423.8/100072, intron 5 of 24)	-199492	Camta1	chr4	151339652	151339760	109	MIR3	SINE	MIR	108
chr4	151339076	151340066	991	10.34	10.65	9.95	0.7	0.00661	0.04	Up	Intron (ENSMUST00000169423.8/100072, intron 5 of 24)	-199492	Camta1	chr4	151339938	151340642	705	L1MD	LINE	L1	128
chr4	151409030	151409173	144	5.59	6.37	3.75	2.61	0.000267	0.00299	Up	Intron (ENSMUST00000169423.8/100072, intron 5 of 24)	-269446	Camta1	.	.	.	.	.	.	.	.
chr4	151515452	151515581	130	4.13	4.98	1.83	3.16	4.89e-07	1.15e-05	Up	Intron (ENSMUST00000169423.8/100072, intron 4 of 24)	346069	Camta1	.	.	.	.	.	.	.	.
chr4	151263969	151264087	119	4.05	4.72	2.76	1.96	0.00068	0.00655	Up	Intron (ENSMUST00000169423.8/100072, intron 6 of 24)	-124385	Camta1	.	.	.	.	.	.	.	.
chr4	151216489	151217125	637	7.58	8.01	6.98	1.03	0.00145	0.0121	Up	Intron (ENSMUST00000169423.8/100072, intron 6 of 24)	-76905	Camta1	chr4	151216679	151216787	109	Cheshire	DNA	hAT-Charlie	108
chr4	151458860	151458991	132	4.56	5.14	3.57	1.57	0.000431	0.00449	Up	Intron (ENSMUST00000169423.8/100072, intron 4 of 24)	-319276	Camta1	chr4	151458843	151459726	884	L1M4	LINE	L1	131
chr4	151880157	151880572	416	7.16	7.99	5.01	2.98	1.75e-17	1.45e-15	Up	Distal Intergenic	-18281	Camta1	chr4	151880130	151880298	169	B3	SINE	B2	141
chr4	151880157	151880572	416	7.16	7.99	5.01	2.98	1.75e-17	1.45e-15	Up	Distal Intergenic	-18281	Camta1	chr4	151880419	151880600	182	B3	SINE	B2	153
chr4	151335464	151335608	145	6.78	7.21	6.15	1.06	0.0013	0.0112	Up	Intron (ENSMUST00000169423.8/100072, intron 5 of 24)	-195880	Camta1	.	.	.	.	.	.	.	.
chr4	151876362	151876660	299	5.85	6.35	5.07	1.28	0.000159	0.00193	Up	Distal Intergenic	-14486	Camta1	.	.	.	.	.	.	.	.
chr4	151651600	151651972	373	9.26	10.09	7.17	2.92	7.86e-32	2.06e-29	Up	Intron (ENSMUST00000169423.8/100072, intron 3 of 24)	209678	Camta1	chr4	151651573	151651998	426	RLTR10C	LTR	ERVK	372
chr4	151404860	151405180	321	6.26	7	4.62	2.38	2.26e-09	8.1e-08	Up	Intron (ENSMUST00000169423.8/100072, intron 5 of 24)	-265276	Camta1	.	.	.	.	.	.	.	.
chr4	151511244	151511408	165	5.24	6.12	2.61	3.5	3.42e-14	2.16e-12	Up	Intron (ENSMUST00000169423.8/100072, intron 4 of 24)	350242	Camta1	chr4	151511244	151511426	183	B3A	SINE	B2	164
chr4	151604531	151605187	657	8.48	8.82	8.05	0.76	0.00565	0.0355	Up	Intron (ENSMUST00000169423.8/100072, intron 3 of 24)	256463	Camta1	chr4	151604832	151604874	43	(TTGG)n	Simple_repeat	Simple_repeat	42
chr4	151483320	151483687	368	6.85	7.37	6.03	1.34	2.25e-05	0.000353	Up	Intron (ENSMUST00000169423.8/100072, intron 4 of 24)	-343736	Camta1	.	.	.	.	.	.	.	.
chr4	151239347	151239592	246	6.44	7.21	4.63	2.59	2.54e-13	1.48e-11	Up	Intron (ENSMUST00000169423.8/100072, intron 6 of 24)	-99763	Camta1	chr4	151239251	151239671	421	Charlie8	DNA	hAT-Charlie	245
chr4	151302185	151302713	529	7.87	8.3	7.25	1.06	0.000775	0.00729	Up	Intron (ENSMUST00000169423.8/100072, intron 5 of 24)	-162601	Camta1	.	.	.	.	.	.	.	.
chr4	151694174	151694313	140	4.06	4.91	1.74	3.18	5.01e-07	1.18e-05	Up	Intron (ENSMUST00000169423.8/100072, intron 3 of 24)	167337	Camta1	chr4	151694140	151694355	216	B3A	SINE	B2	139
chr4	151506732	151507057	326	6.4	7.3	3.6	3.69	1.01e-17	8.6e-16	Up	Intron (ENSMUST00000169423.8/100072, intron 4 of 24)	354593	Camta1	chr4	151506865	151507000	136	L1MC4	LINE	L1	135
chr4	151506732	151507057	326	6.4	7.3	3.6	3.69	1.01e-17	8.6e-16	Up	Intron (ENSMUST00000169423.8/100072, intron 4 of 24)	354593	Camta1	chr4	151507024	151507103	80	(TC)n	Simple_repeat	Simple_repeat	33
chr4	151666309	151666901	593	6.86	7.26	6.29	0.97	0.00528	0.0336	Up	Intron (ENSMUST00000169423.8/100072, intron 3 of 24)	194749	Camta1	.	.	.	.	.	.	.	.
chr4	132346682	132346958	277	6.54	7	5.86	1.14	2.6e-05	0.0004	Up	Promoter (<=1kb)	-935	Rcc1	chr4	132346822	132346993	172	B2_Mm2	SINE	B2	136
chr4	152029207	152029280	74	5.74	6.36	4.66	1.7	3.41e-07	8.3e-06	Up	Promoter (1-2kb)	-1536	Zbtb48	chr4	152029162	152029353	192	B2_Mm2	SINE	B2	73
chr6	141430270	141430383	114	4.69	5.43	3.05	2.39	2.83e-06	5.61e-05	Up	Intron (ENSMUST00000043259.9/54611, intron 2 of 15)	89717	Gm10400	chr6	141430204	141430412	209	B3	SINE	B2	113
chr1	46580545	46580681	137	4.63	5.13	3.86	1.27	0.00509	0.0327	Up	Intron (ENSMUST00000189749.6/100101919, intron 19 of 64)	-28280	Dnah7c	.	.	.	.	.	.	.	.
chr1	46408785	46409062	278	6.18	6.58	5.61	0.97	0.000459	0.00474	Up	Distal Intergenic	-16530	Dnah7c	chr1	46408934	46409959	1026	RLTR13D5	LTR	ERVK	128
chr16	43638497	43638650	154	4.7	5.32	3.62	1.69	8.71e-05	0.00115	Up	Promoter (2-3kb)	-2005	Mir568	.	.	.	.	.	.	.	.
chr15	35727549	35728163	615	8.04	8.45	7.46	1	0.00193	0.0153	Up	Intron (ENSMUST00000048646.8/666173, intron 34 of 61)	-66502	Mir875	chr15	35727475	35728407	933	RMER19B	LTR	ERVK	614
chr13	58048077	58048341	265	5.54	6.32	3.73	2.58	2.24e-12	1.18e-10	Up	Intron (ENSMUST00000091583.5/100503085, intron 8 of 16)	-24877	Mir874	chr13	58048155	58048332	178	B3	SINE	B2	177
chr13	58048077	58048341	265	5.54	6.32	3.73	2.58	2.24e-12	1.18e-10	Up	Intron (ENSMUST00000091583.5/100503085, intron 8 of 16)	-24877	Mir874	chr13	58048332	58048362	31	(CAAAA)n	Simple_repeat	Simple_repeat	9
chr13	58054228	58054356	129	5.33	5.98	4.15	1.83	6.83e-07	1.56e-05	Up	Intron (ENSMUST00000091583.5/100503085, intron 7 of 16)	-31028	Mir874	chr13	58054216	58054416	201	B3	SINE	B2	128
chr13	58045374	58045581	208	5.67	6.34	4.37	1.97	1.53e-08	4.8e-07	Up	Intron (ENSMUST00000091583.5/100503085, intron 8 of 16)	-22174	Mir874	chr13	58045358	58045539	182	B3	SINE	B2	165
chr13	58045374	58045581	208	5.67	6.34	4.37	1.97	1.53e-08	4.8e-07	Up	Intron (ENSMUST00000091583.5/100503085, intron 8 of 16)	-22174	Mir874	chr13	58045539	58045608	70	B1_Mur1	SINE	Alu	42
chr13	58035498	58035750	253	5.79	6.31	4.96	1.35	2.52e-05	0.00039	Up	Intron (ENSMUST00000091583.5/100503085, intron 8 of 16)	-12298	Mir874	.	.	.	.	.	.	.	.
chr5	9375917	9376270	354	5.95	6.64	4.59	2.04	2.41e-08	7.34e-07	Up	Promoter (<=1kb)	213	Mir879	chr5	9375880	9376357	478	RMER19A	LTR	ERVK	353
chr5	9346502	9347153	652	7.46	7.91	6.8	1.11	2.14e-05	0.000338	Up	Intron (ENSMUST00000155764.7/231014, intron 1 of 21)	-28551	Mir879	.	.	.	.	.	.	.	.
chr3	64172457	64172691	235	7.19	7.66	6.51	1.14	9.08e-06	0.000158	Up	Distal Intergenic	-30529	Vmn2r2	chr3	64172382	64172494	113	(CACAG)n	Simple_repeat	Simple_repeat	37
chr3	64172457	64172691	235	7.19	7.66	6.51	1.14	9.08e-06	0.000158	Up	Distal Intergenic	-30529	Vmn2r2	chr3	64172494	64172674	181	(CAGAG)n	Simple_repeat	Simple_repeat	180
chr3	64172457	64172691	235	7.19	7.66	6.51	1.14	9.08e-06	0.000158	Up	Distal Intergenic	-30529	Vmn2r2	chr3	64172674	64172736	63	(CACAG)n	Simple_repeat	Simple_repeat	17
chr3	64171396	64171608	213	6.84	7.32	6.13	1.19	0.000217	0.00252	Up	Distal Intergenic	-29468	Vmn2r2	chr3	64171394	64171574	181	(CAGAG)n	Simple_repeat	Simple_repeat	178
chr3	64171396	64171608	213	6.84	7.32	6.13	1.19	0.000217	0.00252	Up	Distal Intergenic	-29468	Vmn2r2	chr3	64171594	64172181	588	(CAGAG)n	Simple_repeat	Simple_repeat	14
chr11	118460433	118460576	144	5.03	5.71	3.7	2.02	1.17e-05	0.000198	Up	Distal Intergenic	-5438	Gm11747	chr11	118460380	118460575	196	B3	SINE	B2	142
chr15	101499501	101499687	187	5.23	5.8	4.25	1.55	0.000145	0.00178	Up	Distal Intergenic	-7989	Krt83	chr15	101499080	101499781	702	RMER19A	LTR	ERVK	186
chr15	35343095	35343230	136	4.39	5	3.3	1.69	0.000366	0.00392	Up	Distal Intergenic	-14560	BC048602	chr15	35342961	35343106	146	B1_Mus1	SINE	Alu	11
chr15	35343095	35343230	136	4.39	5	3.3	1.69	0.000366	0.00392	Up	Distal Intergenic	-14560	BC048602	chr15	35343106	35343275	170	B3A	SINE	B2	124
chr15	35316761	35317057	297	7.64	8.38	6.08	2.3	7.49e-20	7.57e-18	Up	Intron (ENSMUST00000227345.1/100126269, intron 1 of 2)	-3614	BC048602	chr15	35316662	35317086	425	RLTR10C	LTR	ERVK	296
chr12	112433437	112433777	341	5.58	6	4.98	1.02	0.0017	0.0138	Up	Promoter (1-2kb)	1561	B020018J22Rik	.	.	.	.	.	.	.	.
chr12	112450951	112451188	238	6.75	7.13	6.22	0.92	0.00245	0.0185	Up	Distal Intergenic	-15613	B020018J22Rik	chr12	112450912	112451124	213	B3	SINE	B2	173
chr12	112450951	112451188	238	6.75	7.13	6.22	0.92	0.00245	0.0185	Up	Distal Intergenic	-15613	B020018J22Rik	chr12	112451124	112451371	248	ORR1C1	LTR	ERVL-MaLR	64
chr17	40483649	40483731	83	4.77	5.26	4.02	1.23	0.00267	0.0198	Up	Distal Intergenic	-36291	Esp8	chr17	40483471	40483983	513	RLTR45	LTR	ERVK	82
chr4	152260499	152260735	237	7.19	7.52	6.76	0.76	0.00321	0.0228	Up	Intron (ENSMUST00000075363.9/70025, intron 7 of 8)	-13497	Gpr153	.	.	.	.	.	.	.	.
chr4	152278082	152278210	129	5.33	6.12	3.47	2.64	5.34e-10	2.1e-08	Up	Promoter (<=1kb)	-802	Gpr153	chr4	152277990	152278167	178	B3A	SINE	B2	85
chr4	152278082	152278210	129	5.33	6.12	3.47	2.64	5.34e-10	2.1e-08	Up	Promoter (<=1kb)	-802	Gpr153	chr4	152278167	152278359	193	B2_Mm2	SINE	B2	43
chr4	134392749	134392926	178	7.32	7.77	6.66	1.12	1.61e-05	0.000262	Up	Distal Intergenic	-3394	Pafah2	chr4	134392798	134392877	80	RMER17C	LTR	ERVK	79
chr4	134392749	134392926	178	7.32	7.77	6.66	1.12	1.61e-05	0.000262	Up	Distal Intergenic	-3394	Pafah2	chr4	134392881	134392969	89	(TC)n	Simple_repeat	Simple_repeat	45
chr4	134409436	134409570	135	4.67	5.62	0.89	4.73	2.74e-11	1.28e-09	Up	Intron (ENSMUST00000105869.8/100163, intron 4 of 10)	6466	Pafah2	chr4	134409415	134409570	156	B3A	SINE	B2	134
chr4	134393005	134393246	242	7	7.61	5.93	1.68	1.09e-08	3.51e-07	Up	Distal Intergenic	-3074	Pafah2	chr4	134393084	134393279	196	B3	SINE	B2	162
chr4	132370033	132370286	254	6.56	6.96	6.01	0.95	0.00169	0.0138	Up	Promoter (<=1kb)	245	Phactr4	.	.	.	.	.	.	.	.
chr4	132365505	132365995	491	6.8	7.23	6.17	1.07	0.000254	0.00288	Up	Exon (ENSMUST00000102568.9/100169, exon 10 of 14)	4536	Phactr4	chr4	132365938	132365989	52	B3	SINE	B2	51
chr4	132403128	132403684	557	8.17	8.52	7.7	0.82	0.00286	0.0209	Up	Intron (ENSMUST00000102568.9/100169, intron 2 of 13)	-4917	Phactr4	.	.	.	.	.	.	.	.
chr7	43212215	43212301	87	7.04	7.85	5.02	2.83	5.82e-18	5.1e-16	Up	Promoter (1-2kb)	-1738	EU599041	chr7	43212075	43212506	432	RLTR10C	LTR	ERVK	86
chr4	127072676	127072829	154	7.11	7.9	5.18	2.73	4.24e-22	5.09e-20	Up	Distal Intergenic	-4554	Zmym6	chr4	127072551	127072979	429	RLTR10C	LTR	ERVK	153
chr4	63398266	63398457	192	6.12	6.52	5.58	0.94	0.00264	0.0196	Up	Intron (ENSMUST00000035724.4/100182, intron 1 of 21)	4897	Akna	.	.	.	.	.	.	.	.
chr10	77826423	77827009	587	9.12	9.7	8.12	1.58	5.52e-12	2.78e-10	Up	Promoter (<=1kb)	86	Krtap10-4	chr10	77826580	77826740	161	(CAGG)n	Simple_repeat	Simple_repeat	160
chr4	15328655	15328811	157	5	5.47	4.29	1.18	0.00564	0.0354	Up	Distal Intergenic	62824	Tmem64	.	.	.	.	.	.	.	.
chr4	43405169	43405371	203	6.73	7.1	6.23	0.87	0.000597	0.0059	Up	Promoter (1-2kb)	-1064	Rusc2	chr4	43405099	43405175	77	MER2	DNA	TcMar-Tigger	6
chr4	43405169	43405371	203	6.73	7.1	6.23	0.87	0.000597	0.0059	Up	Promoter (1-2kb)	-1064	Rusc2	chr4	43405332	43405477	146	B1_Mur2	SINE	Alu	39
chr4	43384163	43384338	176	6.67	7.07	6.11	0.96	0.00079	0.00741	Up	Promoter (<=1kb)	0	Rusc2	.	.	.	.	.	.	.	.
chr2	150290229	150290350	122	3.76	4.47	2.31	2.16	0.000425	0.00444	Up	Distal Intergenic	32712	Gm14124	chr2	150290223	150290360	138	B2_Mm2	SINE	B2	121
chr2	150290459	150290813	355	5.05	5.86	3.07	2.79	6e-10	2.34e-08	Up	Distal Intergenic	32942	Gm14124	chr2	150290612	150290666	55	MuRRS4-int	LTR	ERV1	54
chr2	150290459	150290813	355	5.05	5.86	3.07	2.79	6e-10	2.34e-08	Up	Distal Intergenic	32942	Gm14124	chr2	150290666	150290737	72	(GA)n	Simple_repeat	Simple_repeat	71
chr2	150290459	150290813	355	5.05	5.86	3.07	2.79	6e-10	2.34e-08	Up	Distal Intergenic	32942	Gm14124	chr2	150290737	150291247	511	MuRRS4-int	LTR	ERV1	76
chr2	150257262	150257716	455	8.43	9.3	5.81	3.49	6.4e-34	2.01e-31	Up	Promoter (<=1kb)	0	Gm14124	.	.	.	.	.	.	.	.
chr2	150257006	150257146	141	6.77	7.59	4.63	2.96	1.34e-21	1.56e-19	Up	Promoter (<=1kb)	-371	Gm14124	chr2	150256941	150257092	152	B2_Mm2	SINE	B2	86
chr11	69078875	69079139	265	5.97	6.43	5.3	1.13	0.000255	0.00289	Up	Distal Intergenic	5448	Snord118	chr11	69078805	69079164	360	ORR1B1	LTR	ERVL-MaLR	264
chr17	34941603	34942050	448	6.79	7.12	6.35	0.77	0.00531	0.0338	Up	Distal Intergenic	8967	Snord52	chr17	34941835	34941902	68	L3	LINE	CR1	67
chr17	34941603	34942050	448	6.79	7.12	6.35	0.77	0.00531	0.0338	Up	Distal Intergenic	8967	Snord52	chr17	34941935	34942003	69	G-rich	Low_complexity	Low_complexity	68
chr2	167092031	167092463	433	9.95	10.79	7.72	3.06	5.17e-35	1.77e-32	Up	Distal Intergenic	26755	Snord12	chr2	167092031	167092521	491	RLTR10C	LTR	ERVK	432
chr2	167107172	167107297	126	4.08	4.77	2.69	2.08	0.00205	0.0161	Up	Intron (ENSMUST00000207917.1/16500, intron 1 of 1)	41896	Snord12	chr2	167107152	167107342	191	B3	SINE	B2	125
chr11	62616642	62616800	159	8.06	8.87	6.05	2.83	4.89e-24	6.83e-22	Up	Intron (ENSMUST00000057194.8/192976, intron 2 of 3)	12127	Snord65	chr11	62616526	62616891	366	RLTR10C	LTR	ERVK	158
chr1	63185451	63185753	303	8	8.86	5.57	3.29	7.07e-27	1.22e-24	Up	Intron (ENSMUST00000050536.13/241070, intron 2 of 2)	6447	Snora41	chr1	63185400	63185839	440	RLTR10B2	LTR	ERVK	302
chr12	102756435	102756566	132	6.37	6.91	5.49	1.42	4.11e-06	7.84e-05	Up	Promoter (1-2kb)	1199	Gon7	chr12	102756414	102756587	174	B3	SINE	B2	131
chr2	84662965	84663125	161	5.72	6.09	5.23	0.86	0.00758	0.0444	Up	Intron (ENSMUST00000133437.2/100270744, intron 4 of 4)	3419	Btbd18	chr2	84662958	84663143	186	B3	SINE	B2	160
chr5	104068824	104069014	191	6.36	6.83	5.67	1.15	8.49e-05	0.00112	Up	Downstream (1-2kb)	8578	Gm17660	chr5	104068884	104069099	216	B3	SINE	B2	130
chr5	104088922	104089304	383	8.88	9.56	7.54	2.02	2.43e-14	1.56e-12	Up	Intron (ENSMUST00000031249.7/13602, intron 6 of 10)	-11314	Gm17660	chr5	104089178	104089414	237	B4A	SINE	B4	126
chr2	150181232	150182020	789	8.93	9.79	6.53	3.26	8.49e-39	4.03e-36	Up	Promoter (<=1kb)	0	Gm14139	chr2	150181180	150181333	154	B2_Mm2	SINE	B2	101
chr8	58655705	58655947	243	5.28	5.84	4.34	1.5	0.000322	0.00351	Up	Intron (ENSMUST00000204128.2/270049, intron 2 of 12)	44840	Gm15881	.	.	.	.	.	.	.	.
chr15	5126518	5127305	788	7.55	7.93	7.05	0.88	0.00462	0.0303	Up	Distal Intergenic	8114	Snord72	chr15	5126479	5126594	116	Lx8	LINE	L1	76
chr15	5126518	5127305	788	7.55	7.93	7.05	0.88	0.00462	0.0303	Up	Distal Intergenic	8114	Snord72	chr15	5126596	5126705	110	RMER15-int	LTR	ERVL	109
chr15	5126518	5127305	788	7.55	7.93	7.05	0.88	0.00462	0.0303	Up	Distal Intergenic	8114	Snord72	chr15	5126706	5126944	239	ORR1C2	LTR	ERVL-MaLR	238
chr15	5126518	5127305	788	7.55	7.93	7.05	0.88	0.00462	0.0303	Up	Distal Intergenic	8114	Snord72	chr15	5126944	5127683	740	RMER6A	LTR	ERVK	361
chr15	80065559	80065714	156	5.22	5.91	3.84	2.06	7.91e-07	1.79e-05	Up	Distal Intergenic	12877	Snord83b	chr15	80065526	80065732	207	B3	SINE	B2	155
chr15	80066710	80066805	96	4.54	5.12	3.54	1.58	0.000664	0.00643	Up	Distal Intergenic	11786	Snord83b	chr15	80066686	80066848	163	B3	SINE	B2	95
chr11	3318431	3318567	137	4.44	5.11	3.17	1.95	3.61e-05	0.000535	Up	Intron (ENSMUST00000152576.1/100302648, intron 4 of 5)	9435	Gm11944	chr11	3318381	3318698	318	RMER6A	LTR	ERVK	136
chr10	60398527	60398689	163	4.5	5.21	3.05	2.16	7.73e-06	0.000137	Up	Promoter (1-2kb)	-1037	Gm17455	.	.	.	.	.	.	.	.
chr3	88783400	88783721	322	5.99	6.38	5.46	0.93	0.00191	0.0152	Up	Exon (ENSMUST00000184014.7/319830, exon 3 of 3)	8184	5830417I10Rik	chr3	88783273	88783654	382	ORR1C2	LTR	ERVL-MaLR	254
chr3	88783400	88783721	322	5.99	6.38	5.46	0.93	0.00191	0.0152	Up	Exon (ENSMUST00000184014.7/319830, exon 3 of 3)	8184	5830417I10Rik	chr3	88783656	88783826	171	B3	SINE	B2	65
chr5	138360553	138360678	126	6.58	6.99	5.99	1	0.000323	0.00352	Up	Distal Intergenic	-3041	Gm10874	chr5	138360556	138360698	143	B4	SINE	B4	122
chr14	75880362	75880534	173	5.44	6.08	4.27	1.81	2.27e-06	4.6e-05	Up	Distal Intergenic	32457	Snora31	chr14	75880315	75880461	147	B1_Mur3	SINE	Alu	99
chr14	75880362	75880534	173	5.44	6.08	4.27	1.81	2.27e-06	4.6e-05	Up	Distal Intergenic	32457	Snora31	chr14	75880478	75880604	127	B4	SINE	B4	56
chr14	75871895	75872045	151	5.56	6.39	3.37	3.03	5.61e-13	3.14e-11	Up	Distal Intergenic	23990	Snora31	chr14	75871863	75872032	170	B3A	SINE	B2	137
chr14	75871895	75872045	151	5.56	6.39	3.37	3.03	5.61e-13	3.14e-11	Up	Distal Intergenic	23990	Snora31	chr14	75872032	75872165	134	B1_Mus1	SINE	Alu	13
chr4	3192251	3192586	336	9.95	10.25	9.57	0.68	0.00196	0.0155	Up	Distal Intergenic	-6893	Vmn1r3	chr4	3192211	3192537	327	IAPEY4_LTR	LTR	ERVK	286
chr4	3192251	3192586	336	9.95	10.25	9.57	0.68	0.00196	0.0155	Up	Distal Intergenic	-6893	Vmn1r3	chr4	3192537	3200204	7668	IAPEY4_I-int	LTR	ERVK	49
chr7	13169988	13170539	552	9.76	10.06	9.37	0.69	0.00126	0.0108	Up	Distal Intergenic	-7180	Vmn1r88	chr7	13168944	13176507	7564	MMERGLN-int	LTR	ERV1	551
chr2	147170627	147171280	654	9.73	10.59	7.32	3.28	8.77e-45	6.3e-42	Up	Distal Intergenic	-12803	Nkx2-2os	chr2	147170626	147170732	107	RSINE1	SINE	B4	105
chr2	147170627	147171280	654	9.73	10.59	7.32	3.28	8.77e-45	6.3e-42	Up	Distal Intergenic	-12803	Nkx2-2os	chr2	147170732	147171229	498	RLTR10C	LTR	ERVK	497
chr2	147170627	147171280	654	9.73	10.59	7.32	3.28	8.77e-45	6.3e-42	Up	Distal Intergenic	-12803	Nkx2-2os	chr2	147171229	147171255	27	RSINE1	SINE	B4	26
chr12	109612994	109613120	127	4.07	4.67	3.05	1.62	0.00739	0.0435	Up	Promoter (1-2kb)	1172	Mir1188	.	.	.	.	.	.	.	.
chr3	85480787	85480892	106	4.86	5.58	3.39	2.19	3e-06	5.91e-05	Up	Intron (ENSMUST00000154148.7/99889, intron 3 of 9)	13410	Mir466k	chr3	85480777	85480962	186	B3A	SINE	B2	105
chr19	23178636	23178820	185	4.76	5.25	4.01	1.25	0.00776	0.0451	Up	Distal Intergenic	29205	Mir1192	chr19	23178715	23178852	138	B1_Mur1	SINE	Alu	105
chr9	115577819	115578569	751	10.06	10.94	7.44	3.5	2.2e-48	1.96e-45	Up	Distal Intergenic	196000	Mir467h	chr9	115577622	115577922	301	L1MA9	LINE	L1	103
chr9	115577819	115578569	751	10.06	10.94	7.44	3.5	2.2e-48	1.96e-45	Up	Distal Intergenic	196000	Mir467h	chr9	115577922	115578489	568	RLTR10C	LTR	ERVK	567
chr9	115577819	115578569	751	10.06	10.94	7.44	3.5	2.2e-48	1.96e-45	Up	Distal Intergenic	196000	Mir467h	chr9	115578489	115578713	225	L1MA9	LINE	L1	80
chr9	115401436	115401847	412	6.26	6.86	5.23	1.63	1.18e-07	3.18e-06	Up	Distal Intergenic	19617	Mir467h	.	.	.	.	.	.	.	.
chr12	54624924	54625052	129	6.36	6.94	5.38	1.56	1.01e-07	2.76e-06	Up	Distal Intergenic	20960	Mir1892	chr12	54624876	54625331	456	IAPLTR2_Mm	LTR	ERVK	128
chr12	54598520	54599011	492	8.77	9.59	6.68	2.91	3.76e-36	1.45e-33	Up	Distal Intergenic	47001	Mir1892	chr12	54598647	54598667	21	B3	SINE	B2	20
chr12	54598520	54599011	492	8.77	9.59	6.68	2.91	3.76e-36	1.45e-33	Up	Distal Intergenic	47001	Mir1892	chr12	54598667	54599089	423	RLTR10C	LTR	ERVK	344
chr12	54573005	54573330	326	6.11	6.96	3.81	3.14	8.05e-21	8.91e-19	Up	Distal Intergenic	72682	Mir1892	chr12	54573000	54573168	169	MTA_Mm-int	LTR	ERVL-MaLR	163
chr12	54573005	54573330	326	6.11	6.96	3.81	3.14	8.05e-21	8.91e-19	Up	Distal Intergenic	72682	Mir1892	chr12	54573190	54573336	147	B1_Mus1	SINE	Alu	140
chr13	109912652	109913015	364	6.93	7.32	6.39	0.93	0.000547	0.00548	Up	Intron (ENSMUST00000122041.7/238871, intron 8 of 16)	8843	Mir1904	.	.	.	.	.	.	.	.
chr10	44380584	44380984	401	6.33	6.7	5.83	0.87	0.00827	0.0474	Up	Distal Intergenic	20908	Mir1929	.	.	.	.	.	.	.	.
chr18	12703602	12703865	264	5.22	5.88	3.96	1.92	1.82e-06	3.79e-05	Up	Intron (ENSMUST00000234974.1/72747, intron 6 of 7)	-10946	Mir1948	.	.	.	.	.	.	.	.
chr2	151962475	151963019	545	9.23	9.58	8.77	0.81	0.000162	0.00196	Up	Distal Intergenic	4598	Mir1953	chr2	151962443	151962498	56	(GGGA)n	Simple_repeat	Simple_repeat	23
chr2	151962475	151963019	545	9.23	9.58	8.77	0.81	0.000162	0.00196	Up	Distal Intergenic	4598	Mir1953	chr2	151962859	151962963	105	L1ME4b	LINE	L1	104
chr3	115942439	115942808	370	6.58	7	5.98	1.03	0.000155	0.00189	Up	3' UTR	-37094	Mir669n	.	.	.	.	.	.	.	.
chr7	29774846	29775074	229	4.84	5.53	3.48	2.05	1.48e-05	0.000244	Up	Promoter (1-2kb)	1552	Mir1964	.	.	.	.	.	.	.	.
chr8	105613078	105613446	369	6.59	6.94	6.15	0.79	0.00443	0.0294	Up	Promoter (2-3kb)	-2020	Mir1966	.	.	.	.	.	.	.	.
chr9	104408652	104409048	397	7.92	8.22	7.54	0.68	0.00663	0.04	Up	Distal Intergenic	-17065	Mir2136	chr9	104408665	104408738	74	tRNA-Glu-GAG_	tRNA	tRNA	73
chr9	104408652	104409048	397	7.92	8.22	7.54	0.68	0.00663	0.04	Up	Distal Intergenic	-17065	Mir2136	chr9	104408776	104409028	253	LTR31	LTR	ERV1	252
chr4	139961380	139961682	303	8.77	9.68	5.78	3.9	5.68e-46	4.37e-43	Up	3' UTR	5938	Mir2139	chr4	139961382	139961811	430	RLTR10C	LTR	ERVK	300
chr4	139958058	139958305	248	8.57	9.43	6.12	3.31	2.37e-33	7.06e-31	Up	Downstream (1-2kb)	9315	Mir2139	chr4	139957841	139958340	500	RLTR10C	LTR	ERVK	247
chr4	139966025	139966158	134	5.88	6.62	4.28	2.34	2.37e-08	7.21e-07	Up	Promoter (1-2kb)	1462	Mir2139	.	.	.	.	.	.	.	.
chr4	139963129	139963437	309	7.41	8.19	5.59	2.6	2.05e-16	1.56e-14	Up	3' UTR	4183	Mir2139	chr4	139963333	139963450	118	MER117	DNA	hAT-Charlie	104
chr2	32651458	32651758	301	6.24	6.6	5.76	0.84	0.00419	0.0281	Up	Promoter (<=1kb)	-571	Mir1954	chr2	32651612	32651719	108	ID_B1	SINE	B4	107
chr2	32651458	32651758	301	6.24	6.6	5.76	0.84	0.00419	0.0281	Up	Promoter (<=1kb)	-571	Mir1954	chr2	32651722	32651820	99	B3A	SINE	B2	36
chr5	83021156	83021340	185	7.49	8.03	6.61	1.41	3.2e-09	1.12e-07	Up	Distal Intergenic	-222091	Mir1187	chr5	83021159	83021511	353	IAPLTR1_Mm	LTR	ERVK	181
chr5	83027954	83028118	165	7.55	8.06	6.76	1.3	1.67e-06	3.5e-05	Up	Distal Intergenic	-228889	Mir1187	chr5	83027954	83028306	353	IAPLTR1_Mm	LTR	ERVK	164
chr13	71314841	71315147	307	8.41	9.25	6.1	3.16	6.28e-35	2.14e-32	Up	Distal Intergenic	207752	Mir466f-4	chr13	71314758	71315190	433	RLTR10C	LTR	ERVK	306
chr13	71065466	71065937	472	8.52	8.82	8.13	0.69	0.00252	0.0189	Up	Distal Intergenic	-41152	Mir466f-4	chr13	71065763	71065891	129	ORR1D2	LTR	ERVL-MaLR	128
chr13	71065466	71065937	472	8.52	8.82	8.13	0.69	0.00252	0.0189	Up	Distal Intergenic	-41152	Mir466f-4	chr13	71065891	71066000	110	(GGGAGA)n	Simple_repeat	Simple_repeat	46
chr13	71461681	71461891	211	5.94	6.3	5.45	0.85	0.0038	0.0261	Up	Distal Intergenic	354592	Mir466f-4	chr13	71461621	71461835	215	Lx8	LINE	L1	154
chr2	10658371	10658602	232	5.65	6.36	4.2	2.15	1.42e-08	4.48e-07	Up	Distal Intergenic	140216	Mir669h	.	.	.	.	.	.	.	.
chr2	10785305	10785427	123	5.64	6.07	5.03	1.04	0.00371	0.0256	Up	Distal Intergenic	267150	Mir669h	.	.	.	.	.	.	.	.
chr2	10762008	10762163	156	4.17	4.88	2.7	2.18	4.97e-05	0.000708	Up	Distal Intergenic	243853	Mir669h	.	.	.	.	.	.	.	.
chr2	10737264	10737707	444	8.01	8.28	7.66	0.62	0.00774	0.045	Up	Distal Intergenic	219109	Mir669h	.	.	.	.	.	.	.	.
chr2	10671088	10671536	449	6.32	6.81	5.57	1.25	0.000141	0.00174	Up	Distal Intergenic	152933	Mir669h	chr2	10671526	10671551	26	(TG)n	Simple_repeat	Simple_repeat	10
chr2	10762329	10762594	266	5.36	6.03	4.08	1.95	2.69e-07	6.72e-06	Up	Distal Intergenic	244174	Mir669h	chr2	10762271	10762364	94	MER5A	DNA	hAT-Charlie	35
chr2	10761387	10761802	416	5.66	6.39	4.1	2.29	6.94e-10	2.68e-08	Up	Distal Intergenic	243232	Mir669h	chr2	10761662	10761782	121	B4	SINE	B4	120
chr4	126850141	126850545	405	7.92	8.37	7.26	1.11	0.000128	0.0016	Up	Promoter (<=1kb)	0	AU040320	.	.	.	.	.	.	.	.
chr4	132823721	132823860	140	5.26	5.69	4.66	1.03	0.00841	0.048	Up	Distal Intergenic	9115	Ppp1r8	chr4	132823678	132823802	125	B3A	SINE	B2	81
chr4	132823721	132823860	140	5.26	5.69	4.66	1.03	0.00841	0.048	Up	Distal Intergenic	9115	Ppp1r8	chr4	132823833	132823862	30	(CAT)n	Simple_repeat	Simple_repeat	27
chr4	132824043	132824300	258	6.63	7.08	5.98	1.11	7.06e-05	0.000958	Up	Downstream (2-3kb)	8675	Ppp1r8	.	.	.	.	.	.	.	.
chr4	133471319	133471397	79	4.11	4.8	2.69	2.11	8.73e-05	0.00115	Up	Distal Intergenic	-8735	Tent5b	chr4	133471239	133471401	163	B3A	SINE	B2	78
chr18	36952784	36953282	499	7.12	7.71	6.11	1.59	4.8e-08	1.38e-06	Up	Promoter (<=1kb)	43	Gm37013	.	.	.	.	.	.	.	.
chr17	49258641	49258782	142	4.44	5.27	2.29	2.97	2.57e-07	6.43e-06	Up	Distal Intergenic	53459	Gm17830	chr17	49258572	49258766	195	B3	SINE	B2	125
chr17	49258641	49258782	142	4.44	5.27	2.29	2.97	2.57e-07	6.43e-06	Up	Distal Intergenic	53459	Gm17830	chr17	49258766	49258894	129	MER2	DNA	TcMar-Tigger	16
chr17	49266484	49266615	132	4.47	5.11	3.26	1.86	0.000131	0.00163	Up	Distal Intergenic	45626	Gm17830	chr17	49266455	49266644	190	B3	SINE	B2	131
chr11	99864664	99864869	206	6.29	6.78	5.54	1.24	1.07e-05	0.000183	Up	Promoter (<=1kb)	188	Gm11559	.	.	.	.	.	.	.	.
chr4	55451171	55451304	134	4.87	5.42	3.97	1.45	0.000321	0.00351	Up	Intron (ENSMUST00000152190.1/ENSMUST00000152190.1, intron 1 of 1)	-32329	Gm12505	chr4	55451108	55451317	210	B3	SINE	B2	133
chr4	55420191	55420501	311	7.73	8.05	7.33	0.72	0.0034	0.0239	Up	Promoter (1-2kb)	-1349	Gm12505	chr4	55420008	55422915	2908	MMVL30-int	LTR	ERV1	310
chr15	59306828	59306976	149	4.96	5.46	4.19	1.28	0.00116	0.0102	Up	Promoter (<=1kb)	0	Zfp572	.	.	.	.	.	.	.	.
chr15	59303674	59303842	169	6.03	6.83	4.05	2.78	3.26e-17	2.66e-15	Up	Distal Intergenic	-3106	Zfp572	chr15	59303639	59303840	202	B3	SINE	B2	166
chr10	99645141	99645247	107	4.42	4.99	3.46	1.53	0.00178	0.0143	Up	Intron (ENSMUST00000218263.1/100504202, intron 1 of 2)	-3221	Gm18409	chr10	99645088	99645290	203	B3	SINE	B2	106
chr4	53600433	53601159	727	7.3	7.7	6.75	0.95	9.83e-05	0.00128	Up	Intron (ENSMUST00000102911.9/100434, intron 15 of 15)	4328	Slc44a1	chr4	53600393	53600443	51	(TG)n	Simple_repeat	Simple_repeat	10
chr4	53600433	53601159	727	7.3	7.7	6.75	0.95	9.83e-05	0.00128	Up	Intron (ENSMUST00000102911.9/100434, intron 15 of 15)	4328	Slc44a1	chr4	53600451	53600545	95	RSINE1	SINE	B4	94
chr4	118991901	118992215	315	6.37	6.94	5.41	1.53	1.58e-05	0.000258	Up	Intron (ENSMUST00000145395.1/ENSMUST00000145395.1, intron 2 of 3)	26526	Lao1	chr4	118991781	118991909	129	B1_Mur2	SINE	Alu	8
chr4	118991901	118992215	315	6.37	6.94	5.41	1.53	1.58e-05	0.000258	Up	Intron (ENSMUST00000145395.1/ENSMUST00000145395.1, intron 2 of 3)	26526	Lao1	chr4	118991810	118991923	114	B4A	SINE	B4	22
chr4	118997179	118997508	330	6.53	7.24	5.07	2.17	9.79e-09	3.18e-07	Up	Exon (ENSMUST00000137353.1/ENSMUST00000137353.1, exon 1 of 2)	31804	Lao1	chr4	118997108	118997506	399	RLTR44B	LTR	ERVK	327
chr4	118994417	118994820	404	7.71	8.19	6.98	1.21	1.12e-05	0.000191	Up	Intron (ENSMUST00000145395.1/ENSMUST00000145395.1, intron 2 of 3)	29042	Lao1	chr4	118994290	118994698	409	RLTR44B	LTR	ERVK	281
chr4	118994417	118994820	404	7.71	8.19	6.98	1.21	1.12e-05	0.000191	Up	Intron (ENSMUST00000145395.1/ENSMUST00000145395.1, intron 2 of 3)	29042	Lao1	chr4	118994698	118995366	669	RLTR44-int	LTR	ERVK	122
chr5	139498019	139498183	165	4.68	5.31	3.55	1.76	6.89e-05	0.000938	Up	Distal Intergenic	-13470	Zfand2a	chr5	139497878	139498154	277	ORR1C2	LTR	ERVL-MaLR	135
chr5	139498019	139498183	165	4.68	5.31	3.55	1.76	6.89e-05	0.000938	Up	Distal Intergenic	-13470	Zfand2a	chr5	139498157	139498292	136	B1_Mur1	SINE	Alu	26
chr1	161180804	161180956	153	5.32	5.79	4.61	1.18	0.00299	0.0216	Up	Intron (ENSMUST00000193379.1/ENSMUST00000193379.1, intron 2 of 25)	-21490	Tex50	chr1	161180606	161180911	306	ORR1F	LTR	ERVL-MaLR	107
chr9	67171559	67171644	86	4.07	4.91	1.85	3.06	2.47e-06	4.97e-05	Up	Intron (ENSMUST00000215645.1/100502636, intron 2 of 2)	37998	Gm19299	chr9	67171561	67171700	140	B3	SINE	B2	83
chr9	67173994	67174080	87	4.42	5.06	3.25	1.81	0.000475	0.00487	Up	Intron (ENSMUST00000215645.1/100502636, intron 2 of 2)	40433	Gm19299	chr9	67173921	67174132	212	B3	SINE	B2	86
chr15	51451735	51452083	349	6.83	7.17	6.38	0.79	0.00207	0.0162	Up	Distal Intergenic	-56125	Gm19303	chr15	51451747	51453890	2144	Lx	LINE	L1	336
chr19	16033864	16034068	205	5.59	5.98	5.06	0.92	0.00662	0.04	Up	Distal Intergenic	48774	C130060C02Rik	chr19	16033914	16033936	23	(CAAA)n	Simple_repeat	Simple_repeat	22
chr9	118188473	118188678	206	6.02	6.69	4.77	1.92	7.11e-08	1.99e-06	Up	Distal Intergenic	38242	Gm17399	chr9	118188463	118188520	58	G-rich	Low_complexity	Low_complexity	47
chr9	118188473	118188678	206	6.02	6.69	4.77	1.92	7.11e-08	1.99e-06	Up	Distal Intergenic	38242	Gm17399	chr9	118188534	118188701	168	B3A	SINE	B2	144
chr16	33327301	33327567	267	5.4	5.93	4.57	1.36	0.000568	0.00566	Up	Distal Intergenic	53108	1700007L15Rik	chr16	33327423	33327624	202	B3	SINE	B2	144
chr17	33897220	33897397	178	6.42	6.79	5.93	0.86	0.00744	0.0437	Up	Distal Intergenic	-6559	Kifc1	chr17	33897195	33897390	196	B2_Mm2	SINE	B2	170
chr9	72422904	72423003	100	3.86	4.6	2.26	2.33	0.000315	0.00345	Up	Distal Intergenic	-12959	BC065403	chr9	72422848	72423024	177	B3A	SINE	B2	99
chr10	77696559	77697109	551	9.48	9.98	8.7	1.28	6.2e-07	1.43e-05	Up	Exon (ENSMUST00000220084.1/ENSMUST00000220084.1, exon 1 of 1)	-5802	Gm19402	.	.	.	.	.	.	.	.
chr10	77689886	77690750	865	9.75	10.17	9.15	1.02	6.5e-05	0.000892	Up	Promoter (<=1kb)	7	Gm19402	.	.	.	.	.	.	.	.
chr18	23745506	23745623	118	6.52	7.19	5.21	1.99	1.12e-09	4.19e-08	Up	Distal Intergenic	6682	Gm15972	chr18	23745376	23745709	334	RLTR10B2	LTR	ERVK	117
chr18	77870025	77870525	501	7.64	8.23	6.62	1.61	1.18e-08	3.79e-07	Up	Exon (ENSMUST00000114741.2/19201, exon 7 of 15)	-67942	Epg5	chr18	77870024	77870053	30	(AGGGGG)n	Simple_repeat	Simple_repeat	28
chr9	121843043	121843185	143	6.11	6.77	4.85	1.92	4.32e-09	1.49e-07	Up	Distal Intergenic	-3582	Ccdc13	chr9	121843074	121843216	143	B2_Mm2	SINE	B2	111
chr3	32486529	32486784	256	5.01	5.79	3.22	2.57	2.08e-07	5.31e-06	Up	Intron (ENSMUST00000164954.2/100502876, intron 1 of 3)	5447	Kcnmb3	chr3	32486468	32486594	127	B4A	SINE	B4	65
chr6	135187579	135187898	320	6.29	6.75	5.61	1.14	0.000285	0.00317	Up	Promoter (<=1kb)	-582	Gm19434	chr6	135187618	135187927	310	MTEa	LTR	ERVL-MaLR	280
chr6	135182279	135182611	333	7.62	8.24	6.49	1.75	1.83e-09	6.65e-08	Up	Intron (ENSMUST00000204730.1/15199, intron 1 of 1)	-5869	Gm19434	.	.	.	.	.	.	.	.
chr6	135187253	135187481	229	5.28	5.78	4.52	1.25	0.0013	0.0112	Up	Promoter (<=1kb)	-999	Gm19434	chr6	135187192	135187361	170	RMER21A	LTR	ERV1	108
chr11	39364935	39365100	166	5.47	5.95	4.75	1.21	0.00108	0.0096	Up	Distal Intergenic	-844922	Gm12130	.	.	.	.	.	.	.	.
chr2	170216096	170216554	459	7.43	8.03	6.38	1.66	5.97e-08	1.69e-06	Up	Distal Intergenic	-22043	Gm17619	chr2	170215868	170216269	402	L1MB8	LINE	L1	173
chr2	170216096	170216554	459	7.43	8.03	6.38	1.66	5.97e-08	1.69e-06	Up	Distal Intergenic	-22043	Gm17619	chr2	170216263	170216475	213	L1MB7	LINE	L1	212
chr2	170216096	170216554	459	7.43	8.03	6.38	1.66	5.97e-08	1.69e-06	Up	Distal Intergenic	-22043	Gm17619	chr2	170216475	170216640	166	RSINE1	SINE	B4	79
chr2	170257786	170258177	392	10.65	11.33	9.28	2.06	1.05e-17	8.91e-16	Up	Distal Intergenic	-63733	Gm17619	chr2	170257675	170257917	243	ORR1D1	LTR	ERVL-MaLR	131
chr2	170257786	170258177	392	10.65	11.33	9.28	2.06	1.05e-17	8.91e-16	Up	Distal Intergenic	-63733	Gm17619	chr2	170257935	170258056	122	ORR1B1	LTR	ERVL-MaLR	121
chr2	170257786	170258177	392	10.65	11.33	9.28	2.06	1.05e-17	8.91e-16	Up	Distal Intergenic	-63733	Gm17619	chr2	170258047	170258175	129	ORR1D1	LTR	ERVL-MaLR	128
chr2	170258385	170258708	324	6.6	7.27	5.3	1.97	2.29e-09	8.21e-08	Up	Distal Intergenic	-64332	Gm17619	.	.	.	.	.	.	.	.
chr2	170247768	170247950	183	7.27	7.75	6.55	1.2	9.04e-06	0.000158	Up	Distal Intergenic	-53715	Gm17619	chr2	170247760	170247850	91	MIRb	SINE	MIR	82
chr2	170228436	170228636	201	5.22	6.13	2.29	3.84	2.06e-14	1.33e-12	Up	Distal Intergenic	-34383	Gm17619	chr2	170228448	170228584	137	B3A	SINE	B2	136
chr2	58237277	58237493	217	5.09	5.59	4.31	1.27	0.000754	0.00713	Up	Distal Intergenic	-39286	Gm13544	.	.	.	.	.	.	.	.
chr6	136449219	136449646	428	7.93	8.48	7.03	1.44	3.55e-08	1.05e-06	Up	Distal Intergenic	-33650	E330021D16Rik	chr6	136449138	136449228	91	GA-rich	Low_complexity	Low_complexity	9
chr6	136430695	136430914	220	6.88	7.48	5.85	1.63	1.23e-08	3.93e-07	Up	Distal Intergenic	-15126	E330021D16Rik	chr6	136430521	136430951	431	MMERGLN_LTR	LTR	ERV1	219
chr6	136422488	136422693	206	5.8	6.16	5.32	0.85	0.00497	0.0321	Up	Distal Intergenic	-6919	E330021D16Rik	.	.	.	.	.	.	.	.
chr13	92987707	92988021	315	6.54	6.96	5.95	1	0.00283	0.0207	Up	Distal Intergenic	-85283	Gm4814	.	.	.	.	.	.	.	.
chr13	93047724	93047816	93	3.57	4.43	1.18	3.25	3.27e-05	0.000491	Up	Intron (ENSMUST00000062122.3/76469, intron 11 of 12)	-25488	Gm4814	chr13	93047707	93047891	185	B3A	SINE	B2	92
chr10	77741775	77742550	776	9.55	10.07	8.73	1.34	1.83e-07	4.73e-06	Up	Exon (ENSMUST00000218133.1/ENSMUST00000218133.1, exon 1 of 1)	15289	Gm10100	.	.	.	.	.	.	.	.
chr19	6000084	6000317	234	6.02	6.62	4.99	1.63	5.26e-07	1.23e-05	Up	Intron (ENSMUST00000025891.8/12333, intron 10 of 21)	-12303	Gm10814	chr19	6000084	6000139	56	ID4	SINE	ID	55
chr19	6000084	6000317	234	6.02	6.62	4.99	1.63	5.26e-07	1.23e-05	Up	Intron (ENSMUST00000025891.8/12333, intron 10 of 21)	-12303	Gm10814	chr19	6000279	6000423	145	B1_Mur4	SINE	Alu	38
chr9	74760148	74760257	110	6.52	7.32	4.54	2.78	4.48e-20	4.61e-18	Up	Distal Intergenic	-87726	Gm16551	chr9	74759915	74760329	415	RLTR10B2	LTR	ERVK	109
chr9	74594074	74594195	122	4.02	4.97	0.31	4.65	3.83e-08	1.13e-06	Up	Distal Intergenic	-253788	Gm16551	chr9	74594070	74594226	157	B3	SINE	B2	121
chr7	52333908	52334087	180	8.02	8.79	6.21	2.59	2.04e-20	2.17e-18	Up	Distal Intergenic	-318180	1700015G11Rik	chr7	52333740	52334170	431	MMERGLN_LTR	LTR	ERV1	179
chr7	52332317	52332659	343	9.62	10.16	8.75	1.41	9.03e-09	2.95e-07	Up	Distal Intergenic	-316589	1700015G11Rik	chr7	52326185	52333740	7556	MMERGLN-int	LTR	ERV1	342
chr7	52325896	52326154	259	7.92	8.7	6.14	2.56	6.71e-24	9.29e-22	Up	Distal Intergenic	-310168	1700015G11Rik	chr7	52325755	52326185	431	MMERGLN_LTR	LTR	ERV1	258
chr3	121609216	121609456	241	6.13	6.49	5.63	0.86	0.00763	0.0446	Up	Distal Intergenic	33911	A730020M07Rik	chr3	121609079	121609350	272	LTR16C	LTR	ERVL	134
chr3	121609216	121609456	241	6.13	6.49	5.63	0.86	0.00763	0.0446	Up	Distal Intergenic	33911	A730020M07Rik	chr3	121609363	121609480	118	LTR16C	LTR	ERVL	93
chr3	121597863	121598428	566	8.23	8.55	7.82	0.73	0.00559	0.0352	Up	Distal Intergenic	44939	A730020M07Rik	.	.	.	.	.	.	.	.
chr3	121650321	121650718	398	6.08	6.55	5.38	1.18	0.000647	0.00629	Up	Distal Intergenic	-6836	A730020M07Rik	.	.	.	.	.	.	.	.
chr15	39821262	39821527	266	5.61	6.02	5.04	0.98	0.00702	0.0418	Up	Intron (ENSMUST00000022915.10/64705, intron 7 of 9)	24217	Gm16291	.	.	.	.	.	.	.	.
chr19	25643181	25643755	575	9.26	10.14	6.56	3.58	3.34e-51	3.57e-48	Up	Distal Intergenic	28467	2610016A17Rik	chr19	25643145	25643617	473	RLTR10C	LTR	ERVK	436
chr19	25643181	25643755	575	9.26	10.14	6.56	3.58	3.34e-51	3.57e-48	Up	Distal Intergenic	28467	2610016A17Rik	chr19	25643644	25643677	34	(TC)n	Simple_repeat	Simple_repeat	33
chr19	25643181	25643755	575	9.26	10.14	6.56	3.58	3.34e-51	3.57e-48	Up	Distal Intergenic	28467	2610016A17Rik	chr19	25643690	25643737	48	CT-rich	Low_complexity	Low_complexity	47
chr13	58067889	58068087	199	4.76	5.25	4.02	1.23	0.00357	0.0248	Up	Intron (ENSMUST00000091583.5/100503085, intron 6 of 16)	34341	Klhl3	chr13	58067820	58067951	132	MIRc	SINE	MIR	62
chr13	58115360	58115545	186	6.21	6.61	5.66	0.95	0.00229	0.0175	Up	Promoter (1-2kb)	-1768	Klhl3	.	.	.	.	.	.	.	.
chr13	58065335	58065499	165	4.5	5.01	3.71	1.3	0.00489	0.0317	Up	Intron (ENSMUST00000091583.5/100503085, intron 6 of 16)	36929	Klhl3	.	.	.	.	.	.	.	.
chr13	58117765	58117875	111	5.25	5.82	4.28	1.55	5.8e-05	0.00081	Up	Distal Intergenic	-4173	Klhl3	.	.	.	.	.	.	.	.
chr19	47517552	47517879	328	6.89	7.26	6.38	0.87	0.00166	0.0135	Up	Intron (ENSMUST00000049369.15/108689, intron 4 of 9)	4570	Gm19557	chr19	47517359	47517685	327	ORR1A2	LTR	ERVL-MaLR	133
chr18	75266265	75266458	194	5.64	6.47	3.43	3.04	2.83e-13	1.64e-11	Up	Intron (ENSMUST00000039608.7/69190, intron 16 of 16)	30859	2010010A06Rik	chr18	75266285	75266417	133	B3A	SINE	B2	132
chr16	91464703	91465390	688	9.28	9.59	8.89	0.7	0.000872	0.00804	Up	Promoter (<=1kb)	0	A930006K02Rik	.	.	.	.	.	.	.	.
chr1	87856928	87857086	159	5.97	6.72	4.32	2.4	1.5e-12	8.03e-11	Up	Intron (ENSMUST00000027517.13/227333, intron 1 of 29)	-2629	Gm19582	chr1	87856869	87856973	105	PB1D11	SINE	Alu	45
chr1	87856928	87857086	159	5.97	6.72	4.32	2.4	1.5e-12	8.03e-11	Up	Intron (ENSMUST00000027517.13/227333, intron 1 of 29)	-2629	Gm19582	chr1	87856982	87857461	480	L1MB7	LINE	L1	104
chr5	75098744	75099003	260	9.06	9.88	7	2.88	3.09e-40	1.65e-37	Up	Distal Intergenic	-11318	Gm19583	chr5	75098664	75099085	422	RLTR10C	LTR	ERVK	259
chr5	100437212	100437354	143	5.91	6.64	4.38	2.26	5.5e-11	2.46e-09	Up	Distal Intergenic	-7677	5430416N02Rik	chr5	100437184	100437368	185	B3	SINE	B2	142
chr5	149027518	149027620	103	4.69	5.51	2.61	2.9	1.29e-08	4.09e-07	Up	Distal Intergenic	20556	Gm15408	chr5	149027441	149027657	217	B3A	SINE	B2	102
chr1	154187081	154187334	254	8.34	9.13	6.42	2.71	8.2e-26	1.3e-23	Up	Distal Intergenic	-13853	Zfp648	chr1	154186990	154187411	422	RLTR10C	LTR	ERVK	253
chr16	45939588	45939695	108	4.22	5.14	1	4.14	1.45e-08	4.58e-07	Up	Intron (ENSMUST00000134802.7/208177, intron 1 of 15)	-5911	Gm15638	chr16	45939566	45939724	159	B3A	SINE	B2	107
chr16	45935912	45936342	431	6.79	7.36	5.85	1.5	2.08e-08	6.41e-07	Up	Exon (ENSMUST00000152070.1/ENSMUST00000152070.1, exon 1 of 2)	-9264	Gm15638	chr16	45935795	45935934	140	(AGGGGG)n	Simple_repeat	Simple_repeat	22
chr16	45935912	45936342	431	6.79	7.36	5.85	1.5	2.08e-08	6.41e-07	Up	Exon (ENSMUST00000152070.1/ENSMUST00000152070.1, exon 1 of 2)	-9264	Gm15638	chr16	45935950	45936085	136	B1_Mur1	SINE	Alu	135
chr16	45935912	45936342	431	6.79	7.36	5.85	1.5	2.08e-08	6.41e-07	Up	Exon (ENSMUST00000152070.1/ENSMUST00000152070.1, exon 1 of 2)	-9264	Gm15638	chr16	45936285	45936335	51	ID4	SINE	ID	50
chr10	77798345	77798924	580	9.37	9.89	8.55	1.33	2.11e-07	5.39e-06	Up	Promoter (<=1kb)	209	Gm19668	.	.	.	.	.	.	.	.
chr10	77787470	77788282	813	10.23	10.78	9.31	1.47	7.85e-10	3.01e-08	Up	Exon (ENSMUST00000180161.1/ENSMUST00000180161.1, exon 1 of 1)	10851	Gm19668	.	.	.	.	.	.	.	.
chr10	77794432	77794889	458	9.7	10.21	8.91	1.3	3.87e-07	9.31e-06	Up	Exon (ENSMUST00000172205.4/ENSMUST00000172205.4, exon 1 of 1)	4244	Gm19668	.	.	.	.	.	.	.	.
chr5	120130212	120130514	303	8.72	9.07	8.26	0.81	0.00177	0.0143	Up	Intron (ENSMUST00000031590.11/74111, intron 11 of 23)	8747	Gm10390	chr5	120130166	120130456	291	ORR1D1	LTR	ERVL-MaLR	244
chr5	120130212	120130514	303	8.72	9.07	8.26	0.81	0.00177	0.0143	Up	Intron (ENSMUST00000031590.11/74111, intron 11 of 23)	8747	Gm10390	chr5	120130456	120130584	129	ORR1D1	LTR	ERVL-MaLR	58
chr17	83085890	83086298	409	5.69	6.1	5.11	0.99	0.00701	0.0418	Up	Distal Intergenic	-7665	Gm19689	chr17	83085928	83086080	153	Tigger12c	DNA	TcMar-Tigger	152
chr17	83085890	83086298	409	5.69	6.1	5.11	0.99	0.00701	0.0418	Up	Distal Intergenic	-7665	Gm19689	chr17	83086204	83086447	244	LTR78	LTR	ERV1	94
chr17	83086851	83086945	95	4.5	5.13	3.35	1.78	0.00099	0.00893	Up	Distal Intergenic	-8626	Gm19689	chr17	83086772	83086976	205	B3	SINE	B2	94
chr1	136683094	136684159	1066	9.07	9.46	8.52	0.93	4.86e-05	0.000694	Up	Promoter (<=1kb)	0	Gm19705	chr1	136683309	136683331	23	AT_rich	Low_complexity	Low_complexity	22
chr1	136683094	136684159	1066	9.07	9.46	8.52	0.93	4.86e-05	0.000694	Up	Promoter (<=1kb)	0	Gm19705	chr1	136684030	136684065	36	(TG)n	Simple_repeat	Simple_repeat	35
chr1	136656637	136656848	212	4.81	5.44	3.66	1.78	0.000308	0.00338	Up	Distal Intergenic	-13921	Gm19705	.	.	.	.	.	.	.	.
chr1	136773865	136774013	149	4.91	5.65	3.33	2.33	8.25e-08	2.28e-06	Up	Distal Intergenic	77654	Platr22	chr1	136773711	136773887	177	ORR1D1	LTR	ERVL-MaLR	22
chr1	136773865	136774013	149	4.91	5.65	3.33	2.33	8.25e-08	2.28e-06	Up	Distal Intergenic	77654	Platr22	chr1	136773888	136774010	123	B3	SINE	B2	122
chr1	136773865	136774013	149	4.91	5.65	3.33	2.33	8.25e-08	2.28e-06	Up	Distal Intergenic	77654	Platr22	chr1	136774009	136774147	139	ORR1F	LTR	ERVL-MaLR	4
chr1	136696288	136696680	393	6.19	6.65	5.53	1.12	0.000192	0.00226	Up	Promoter (<=1kb)	77	Platr22	.	.	.	.	.	.	.	.
chr1	136739469	136739818	350	6.58	7.28	5.18	2.1	5.25e-11	2.36e-09	Up	Distal Intergenic	43258	Platr22	chr1	136739384	136739531	148	B1_Mm	SINE	Alu	62
chr1	136739469	136739818	350	6.58	7.28	5.18	2.1	5.25e-11	2.36e-09	Up	Distal Intergenic	43258	Platr22	chr1	136739531	136739571	41	(A)n	Simple_repeat	Simple_repeat	40
chr1	136739469	136739818	350	6.58	7.28	5.18	2.1	5.25e-11	2.36e-09	Up	Distal Intergenic	43258	Platr22	chr1	136739617	136739786	170	B3	SINE	B2	169
chr1	136739469	136739818	350	6.58	7.28	5.18	2.1	5.25e-11	2.36e-09	Up	Distal Intergenic	43258	Platr22	chr1	136739786	136739926	141	B1_Mur3	SINE	Alu	32
chr11	109441267	109441408	142	6.13	6.5	5.63	0.87	0.00187	0.0149	Up	Promoter (1-2kb)	1111	Gm45916	chr11	109441257	109441457	201	B3	SINE	B2	141
chr6	105257860	105258137	278	7.55	8.24	6.22	2.02	4.76e-13	2.69e-11	Up	Distal Intergenic	234531	Gm19757	chr6	105257791	105258222	432	RLTR10C	LTR	ERVK	277
chr6	105253639	105253771	133	6.97	7.73	5.25	2.48	2.46e-18	2.21e-16	Up	Distal Intergenic	238897	Gm19757	chr6	105253499	105253930	432	RLTR10C	LTR	ERVK	132
chr15	37443407	37443985	579	8.95	9.45	8.17	1.28	4.37e-08	1.27e-06	Up	Intron (ENSMUST00000168992.7/52589, intron 4 of 6)	-9993	Gm15941	chr15	37443779	37443915	137	RSINE1	SINE	B4	136
chr14	65627967	65628119	153	7.11	7.61	6.33	1.28	6.69e-06	0.000121	Up	Intron (ENSMUST00000150897.7/100503545, intron 12 of 18)	22700	Nuggc	.	.	.	.	.	.	.	.
chr5	14998380	14998526	147	7.1	7.85	5.45	2.4	7.91e-14	4.82e-12	Up	Distal Intergenic	-19445	Gm10354	chr5	14998245	14998676	432	RLTR10C	LTR	ERVK	146
chr13	44248362	44248678	317	5.49	5.93	4.87	1.06	0.00259	0.0193	Up	Distal Intergenic	-31875	A330076C08Rik	.	.	.	.	.	.	.	.
chr4	137200443	137200858	416	6.84	7.25	6.25	1	0.000999	0.00899	Up	Distal Intergenic	-35377	Gm13003	.	.	.	.	.	.	.	.
chr16	78231447	78231564	118	4.39	5.2	2.43	2.77	1.77e-07	4.6e-06	Up	Distal Intergenic	22972	E330011O21Rik	chr16	78231429	78231616	188	B3A	SINE	B2	117
chr16	77989257	77989415	159	5.02	5.75	3.45	2.3	3.03e-06	5.96e-05	Up	Distal Intergenic	265121	E330011O21Rik	chr16	77989222	77989401	180	B3	SINE	B2	144
chr16	78096633	78096801	169	5.33	6.24	2.19	4.05	1.85e-14	1.19e-12	Up	Distal Intergenic	157735	E330011O21Rik	chr16	78096641	78096817	177	B2_Mm2	SINE	B2	160
chr16	78030067	78030151	85	5.33	6.06	3.79	2.27	4.22e-09	1.45e-07	Up	Distal Intergenic	224385	E330011O21Rik	chr16	78029891	78030243	353	IAPLTR1a_Mm	LTR	ERVK	84
chr16	78026782	78026906	125	6	6.61	4.92	1.69	6.16e-08	1.74e-06	Up	Distal Intergenic	227630	E330011O21Rik	chr16	78026597	78026949	353	IAPLTR1a_Mm	LTR	ERVK	124
chr6	48351315	48351619	305	6.39	6.8	5.81	0.99	0.0019	0.0151	Up	Distal Intergenic	43789	Gm16630	chr6	48350936	48351460	525	RMER19C	LTR	ERVK	145
chr6	48320880	48321553	674	9.79	10.67	7.1	3.57	9.22e-59	1.69e-55	Up	Distal Intergenic	73855	Gm16630	chr6	48320809	48321241	433	RLTR10C	LTR	ERVK	361
chr6	48320880	48321553	674	9.79	10.67	7.1	3.57	9.22e-59	1.69e-55	Up	Distal Intergenic	73855	Gm16630	chr6	48321244	48321587	344	MMERVK10C-int	LTR	ERVK	309
chr6	48307094	48307313	220	6.25	6.65	5.69	0.95	0.00402	0.0272	Up	Distal Intergenic	88095	Gm16630	chr6	48306638	48307162	525	RMER19C	LTR	ERVK	68
chr6	48327391	48327933	543	9.51	10.39	6.92	3.47	6.76e-51	7.08e-48	Up	Distal Intergenic	67475	Gm16630	chr6	48322398	48327499	5102	MMERVK10C-int	LTR	ERVK	108
chr6	48327391	48327933	543	9.51	10.39	6.92	3.47	6.76e-51	7.08e-48	Up	Distal Intergenic	67475	Gm16630	chr6	48327499	48327931	433	RLTR10C	LTR	ERVK	432
chr4	12008687	12008881	195	5.22	5.92	3.83	2.09	4.6e-06	8.65e-05	Up	Exon (ENSMUST00000156947.1/ENSMUST00000156947.1, exon 1 of 2)	28525	1700123M08Rik	chr4	12008626	12008819	194	B3	SINE	B2	132
chr4	12026179	12026300	122	4.63	5.22	3.63	1.59	0.000861	0.00795	Up	Distal Intergenic	46017	1700123M08Rik	chr4	12026141	12026292	152	B2_Mm2	SINE	B2	113
chr4	12026179	12026300	122	4.63	5.22	3.63	1.59	0.000861	0.00795	Up	Distal Intergenic	46017	1700123M08Rik	chr4	12026292	12026322	31	(TAAA)n	Simple_repeat	Simple_repeat	8
chr13	60203815	60203934	120	5.42	6.14	3.91	2.24	2.17e-09	7.8e-08	Up	Promoter (1-2kb)	-1537	Gm5084	chr13	60203530	60203890	361	IAPLTR1a_Mm	LTR	ERVK	75
chr13	60264637	60264767	131	5.3	5.99	3.91	2.08	1.69e-06	3.53e-05	Up	Distal Intergenic	59166	Gm5084	chr13	60264566	60264768	203	B3A	SINE	B2	130
chr13	60221581	60221924	344	7.49	7.92	6.87	1.04	8.6e-05	0.00114	Up	Distal Intergenic	16110	Gm5084	chr13	60221677	60221704	28	(A)n	Simple_repeat	Simple_repeat	27
chr13	60221581	60221924	344	7.49	7.92	6.87	1.04	8.6e-05	0.00114	Up	Distal Intergenic	16110	Gm5084	chr13	60221717	60222099	383	ORR1C2	LTR	ERVL-MaLR	207
chr15	55115794	55116027	234	7.42	7.82	6.87	0.95	0.00108	0.0096	Up	Promoter (2-3kb)	-2117	Gm9920	.	.	.	.	.	.	.	.
chr4	141267840	141268191	352	6.59	6.98	6.04	0.94	0.00229	0.0176	Up	Distal Intergenic	-10248	Gm13056	chr4	141267784	141267866	83	C-rich	Low_complexity	Low_complexity	26
chr4	141267840	141268191	352	6.59	6.98	6.04	0.94	0.00229	0.0176	Up	Distal Intergenic	-10248	Gm13056	chr4	141268051	141268262	212	L1M5	LINE	L1	140
chr14	56834476	56834811	336	5.63	6.23	4.61	1.62	7.24e-06	0.00013	Up	Distal Intergenic	22487	2410022M11Rik	chr14	56834384	56834922	539	RLTR1B	LTR	ERV1	335
chr3	4404154	4404464	311	5.88	6.37	5.15	1.22	0.00348	0.0243	Up	Distal Intergenic	-394244	1110015O18Rik	.	.	.	.	.	.	.	.
chr3	4389494	4389632	139	7.53	8.23	6.11	2.12	6.41e-16	4.69e-14	Up	Distal Intergenic	-409076	1110015O18Rik	chr3	4387172	4393551	6380	ETnERV-int	LTR	ERVK	138
chr8	90662227	90662390	164	4.68	5.56	2.07	3.48	1.14e-09	4.29e-08	Up	Distal Intergenic	155003	Gm19935	chr8	90662035	90662382	348	ORR1D2	LTR	ERVL-MaLR	155
chr8	90813716	90813863	148	4.69	5.34	3.47	1.87	0.000181	0.00216	Up	Downstream (2-3kb)	3530	Gm19935	chr8	90813682	90813839	158	B3	SINE	B2	123
chr3	4991701	4991935	235	4.8	5.35	3.9	1.45	0.00258	0.0193	Up	Distal Intergenic	-98341	Gm17308	chr3	4991605	4992502	898	RMER17D	LTR	ERVK	234
chr3	4992985	4993390	406	7.22	7.79	6.25	1.54	1.64e-09	6.03e-08	Up	Distal Intergenic	-96886	Gm17308	chr3	4992980	4993272	293	IAP1-MM_LTR	LTR	ERVK	287
chr3	4992985	4993390	406	7.22	7.79	6.25	1.54	1.64e-09	6.03e-08	Up	Distal Intergenic	-96886	Gm17308	chr3	4993272	4993914	643	L1_Mus3	LINE	L1	118
chr5	52504185	52504511	327	6.55	6.93	6.01	0.92	0.00302	0.0218	Up	Distal Intergenic	-32664	Ccdc149	chr5	52503863	52504261	399	Lx8	LINE	L1	76
chr5	52504674	52505015	342	6.72	7.14	6.12	1.02	0.00413	0.0278	Up	Distal Intergenic	-33153	Ccdc149	.	.	.	.	.	.	.	.
chr5	52511162	52511475	314	6.36	6.69	5.93	0.76	0.00793	0.0459	Up	Distal Intergenic	-39641	Ccdc149	chr5	52511307	52511404	98	B1_Mm	SINE	Alu	97
chr12	56144373	56144792	420	6.91	7.32	6.33	0.99	0.000148	0.00181	Up	Distal Intergenic	-108451	Gm19990	chr12	56144318	56144430	113	LTR10_RN	LTR	ERVK	57
chr12	56144373	56144792	420	6.91	7.32	6.33	0.99	0.000148	0.00181	Up	Distal Intergenic	-108451	Gm19990	chr12	56144700	56145515	816	MurERV4_19-int	LTR	ERVK	92
chr12	56068404	56068632	229	7.93	8.52	6.92	1.6	2.52e-10	1.04e-08	Up	Distal Intergenic	-184611	Gm19990	chr12	56068403	56068696	294	IAP1-MM_LTR	LTR	ERVK	228
chr10	93728347	93728547	201	4.63	5.21	3.62	1.59	0.000678	0.00654	Up	Intron (ENSMUST00000020204.4/57764, intron 5 of 9)	-45025	Gm15915	.	.	.	.	.	.	.	.
chr10	93711132	93711511	380	5.97	6.65	4.62	2.03	6.85e-10	2.65e-08	Up	Intron (ENSMUST00000020204.4/57764, intron 5 of 9)	-27810	Gm15915	chr10	93711096	93711216	121	B1_Mus2	SINE	Alu	84
chr10	93711132	93711511	380	5.97	6.65	4.62	2.03	6.85e-10	2.65e-08	Up	Intron (ENSMUST00000020204.4/57764, intron 5 of 9)	-27810	Gm15915	chr10	93711506	93711722	217	B3	SINE	B2	5
chr3	96319987	96320561	575	7.53	8.35	5.45	2.9	8.29e-23	1.06e-20	Up	Distal Intergenic	-24726	Platr30	chr3	96319761	96320141	381	MMERVK10C-int	LTR	ERVK	154
chr3	96319987	96320561	575	7.53	8.35	5.45	2.9	8.29e-23	1.06e-20	Up	Distal Intergenic	-24726	Platr30	chr3	96320144	96320576	433	RLTR10C	LTR	ERVK	417
chr8	104309698	104309912	215	6.33	6.86	5.5	1.36	6.16e-05	0.000853	Up	Promoter (<=1kb)	120	Cmtm1	.	.	.	.	.	.	.	.
chr11	99985817	99986125	309	5.54	6.09	4.67	1.42	0.000108	0.00138	Up	Promoter (<=1kb)	472	Krtap16-1	.	.	.	.	.	.	.	.
chr10	99538700	99539051	352	6.09	6.61	5.28	1.33	0.000238	0.00272	Up	Distal Intergenic	-70120	Gm20110	.	.	.	.	.	.	.	.
chr10	99546087	99546220	134	6.3	6.94	5.12	1.82	2.61e-10	1.07e-08	Up	Distal Intergenic	-62951	Gm20110	chr10	99545857	99546265	409	IAPLTR2a	LTR	ERVK	133
chr10	99551258	99551463	206	6.3	6.98	4.98	2	7.95e-09	2.62e-07	Up	Distal Intergenic	-57708	Gm20110	chr10	99551024	99551432	409	IAPLTR2a	LTR	ERVK	174
chr10	99551258	99551463	206	6.3	6.98	4.98	2	7.95e-09	2.62e-07	Up	Distal Intergenic	-57708	Gm20110	chr10	99551432	99551538	107	(CA)n	Simple_repeat	Simple_repeat	31
chr10	99488092	99488516	425	5.81	6.31	5.03	1.29	0.000429	0.00448	Up	Exon (ENSMUST00000219484.1/ENSMUST00000219484.1, exon 3 of 3)	-120655	Gm20110	chr10	99488079	99488108	30	(TG)n	Simple_repeat	Simple_repeat	16
chr10	4545639	4545814	176	4.39	5	3.32	1.68	0.000511	0.00517	Up	Intron (ENSMUST00000138112.7/100504234, intron 7 of 10)	12644	Ccdc170	chr10	4545672	4545755	84	B3A	SINE	B2	83
chr10	4545639	4545814	176	4.39	5	3.32	1.68	0.000511	0.00517	Up	Intron (ENSMUST00000138112.7/100504234, intron 7 of 10)	12644	Ccdc170	chr10	4545806	4545861	56	(CATA)n	Simple_repeat	Simple_repeat	8
chr10	17367197	17367395	199	4.96	5.52	4.01	1.51	0.000374	0.00399	Up	Distal Intergenic	-271390	Gm20125	.	.	.	.	.	.	.	.
chr10	17317207	17317416	210	8.15	8.93	6.37	2.56	1.73e-20	1.85e-18	Up	Intron (ENSMUST00000220296.1/ENSMUST00000220296.1, intron 2 of 2)	-221400	Gm20125	chr10	17317061	17317491	431	MMERGLN_LTR	LTR	ERV1	209
chr10	17322579	17323462	884	11.21	11.79	10.21	1.58	3.15e-14	1.99e-12	Up	Exon (ENSMUST00000217920.1/ENSMUST00000217920.1, exon 1 of 3)	-226772	Gm20125	chr10	17318562	17324233	5672	MMERGLN-int	LTR	ERV1	883
chr10	17347764	17348108	345	6.59	6.94	6.12	0.82	0.00165	0.0134	Up	Distal Intergenic	-251957	Gm20125	.	.	.	.	.	.	.	.
chr10	17324475	17324584	110	7.46	8.27	5.44	2.83	3.82e-20	3.93e-18	Up	Intron (ENSMUST00000220296.1/ENSMUST00000220296.1, intron 2 of 2)	-228668	Gm20125	chr10	17324233	17324663	431	MMERGLN_LTR	LTR	ERV1	109
chr17	29067979	29068221	243	6.39	6.81	5.81	1	0.00676	0.0407	Up	Intron (ENSMUST00000133221.2/100504267, intron 1 of 1)	4121	Trp53cor1	chr17	29067879	29067985	107	RSINE1	SINE	B4	6
chr17	29067979	29068221	243	6.39	6.81	5.81	1	0.00676	0.0407	Up	Intron (ENSMUST00000133221.2/100504267, intron 1 of 1)	4121	Trp53cor1	chr17	29067985	29068313	329	MTA_Mm	LTR	ERVL-MaLR	236
chr12	70184255	70184678	424	6.23	7	4.43	2.57	0.000108	0.00138	Up	Promoter (2-3kb)	2207	Abhd12b	chr12	70184208	70184349	142	IAPEY3-int	LTR	ERVK	94
chr12	70184255	70184678	424	6.23	7	4.43	2.57	0.000108	0.00138	Up	Promoter (2-3kb)	2207	Abhd12b	chr12	70184644	70185010	367	MMERVK10C-int	LTR	ERVK	34
chr1	25430429	25430779	351	5.61	6.05	4.97	1.08	0.00517	0.0331	Up	Intron (ENSMUST00000146592.7/210933, intron 13 of 28)	-152475	Gm20172	.	.	.	.	.	.	.	.
chr1	25419466	25419692	227	5.55	6.09	4.65	1.44	6.86e-05	0.000935	Up	Intron (ENSMUST00000146592.7/210933, intron 14 of 28)	-141512	Gm20172	chr1	25419597	25419695	99	L1_Mus3	LINE	L1	95
chr1	191230636	191230882	247	4.61	5.1	3.87	1.23	0.00768	0.0448	Up	Distal Intergenic	6182	D730003I15Rik	.	.	.	.	.	.	.	.
chr2	33687576	33687663	88	3.92	4.69	2.19	2.5	5.35e-05	0.000756	Up	Distal Intergenic	46245	C130021I20Rik	chr2	33687528	33687661	134	B3A	SINE	B2	85
chr2	33721844	33721996	153	4.42	5.2	2.61	2.6	1.85e-05	0.000298	Up	Distal Intergenic	80513	C130021I20Rik	chr2	33721782	33721891	110	RLTR17B_Mm	LTR	ERVK	47
chr2	33721844	33721996	153	4.42	5.2	2.61	2.6	1.85e-05	0.000298	Up	Distal Intergenic	80513	C130021I20Rik	chr2	33721838	33722032	195	B3A	SINE	B2	152
chr1	58663458	58663686	229	7.83	8.18	7.37	0.8	0.00108	0.00956	Up	Intron (ENSMUST00000188772.6/108812, intron 11 of 12)	10817	Gm20257	.	.	.	.	.	.	.	.
chr1	58642266	58642767	502	9.46	9.95	8.74	1.21	6.58e-09	2.2e-07	Up	Distal Intergenic	-9874	Gm20257	chr1	58641194	58646596	5403	MMERGLN-int	LTR	ERV1	501
chr1	101290519	101290669	151	6.51	6.98	5.83	1.15	0.00021	0.00244	Up	Distal Intergenic	134710	Gm20268	chr1	101290452	101291587	1136	ERVB4_1B-I_MM-int	LTR	ERVK	150
chr1	102294101	102294274	174	4.02	4.83	2.04	2.79	6.02e-05	0.000835	Up	Distal Intergenic	1138292	Gm20268	chr1	102293936	102294258	323	MTE2b	LTR	ERVL-MaLR	157
chr1	102302159	102302853	695	8.06	8.48	7.47	1.01	5.46e-05	0.000768	Up	Distal Intergenic	1146350	Gm20268	chr1	102301961	102302310	350	ERVB7_2-LTR_MM	LTR	ERVK	151
chr1	102302159	102302853	695	8.06	8.48	7.47	1.01	5.46e-05	0.000768	Up	Distal Intergenic	1146350	Gm20268	chr1	102302322	102302355	34	(TG)n	Simple_repeat	Simple_repeat	33
chr1	102302159	102302853	695	8.06	8.48	7.47	1.01	5.46e-05	0.000768	Up	Distal Intergenic	1146350	Gm20268	chr1	102302357	102302410	54	ETnERV-int	LTR	ERVK	53
chr1	102302159	102302853	695	8.06	8.48	7.47	1.01	5.46e-05	0.000768	Up	Distal Intergenic	1146350	Gm20268	chr1	102302418	102302724	307	RLTR13E	LTR	ERVK	306
chr1	102302159	102302853	695	8.06	8.48	7.47	1.01	5.46e-05	0.000768	Up	Distal Intergenic	1146350	Gm20268	chr1	102302733	102302856	124	ERVB4_1C-LTR_Mm	LTR	ERVK	120
chr1	100784521	100784916	396	9.78	10.68	6.86	3.82	2.6e-58	4.61e-55	Up	Distal Intergenic	-370893	Gm20268	chr1	100784520	100784952	433	RLTR10C	LTR	ERVK	395
chr1	102365315	102365573	259	8.88	9.71	6.79	2.92	1.53e-31	3.92e-29	Up	Distal Intergenic	1209506	Gm20268	chr1	102365232	102365656	425	RLTR10C	LTR	ERVK	258
chr10	120861305	120861469	165	5.33	5.89	4.39	1.51	0.000152	0.00185	Up	Exon (ENSMUST00000127564.1/100504616, exon 3 of 3)	3676	Gm15910	chr10	120861288	120861497	210	B3	SINE	B2	164
chr10	39582523	39582684	162	5.31	5.78	4.6	1.17	0.00112	0.00982	Up	Intron (ENSMUST00000122987.1/100504626, intron 1 of 3)	5768	Gm16364	.	.	.	.	.	.	.	.
chr12	80941610	80942160	551	9.44	10.29	7.13	3.15	4.88e-44	3.41e-41	Up	Downstream (<1kb)	3236	Gm20337	chr12	80941504	80941932	429	RLTR10C	LTR	ERVK	322
chr12	80941610	80942160	551	9.44	10.29	7.13	3.15	4.88e-44	3.41e-41	Up	Downstream (<1kb)	3236	Gm20337	chr12	80941963	80942013	51	MER5B	DNA	hAT-Charlie	50
chr12	80937718	80937924	207	6.21	6.61	5.65	0.96	0.00118	0.0103	Up	Distal Intergenic	7472	Gm20337	chr12	80937839	80938016	178	RSINE1	SINE	B4	85
chr14	47553537	47553678	142	5	5.71	3.54	2.17	6.49e-07	1.49e-05	Up	Intron (ENSMUST00000226299.1/100504663, intron 5 of 10)	6961	Atg14	chr14	47553481	47553681	201	B2_Mm2	SINE	B2	141
chr12	111568713	111569169	457	8.12	8.69	7.16	1.54	3.83e-09	1.33e-07	Up	Distal Intergenic	5171	2810029C07Rik	chr12	111568635	111568780	146	B1_Mus1	SINE	Alu	67
chr8	35591785	35591955	171	6.1	6.72	4.98	1.74	7.06e-09	2.35e-07	Up	Intron (ENSMUST00000037666.5/52065, intron 1 of 2)	-2813	Gm16793	chr8	35591906	35591956	51	(GA)n	Simple_repeat	Simple_repeat	49
chr12	112426681	112426990	310	6.03	6.44	5.45	1	0.00187	0.0149	Up	Downstream (1-2kb)	-3469	A730018C14Rik	.	.	.	.	.	.	.	.
chr12	112309809	112310054	246	6.08	6.73	4.85	1.88	1.9e-07	4.9e-06	Up	Distal Intergenic	113144	A730018C14Rik	chr12	112309786	112309886	101	(CA)n	Simple_repeat	Simple_repeat	77
chr7	73276051	73276282	232	4.86	5.47	3.79	1.68	0.00117	0.0102	Up	Distal Intergenic	-34098	4930429H19Rik	.	.	.	.	.	.	.	.
chr7	73323737	73323925	189	5.74	6.56	3.63	2.93	6.75e-15	4.55e-13	Up	Intron (ENSMUST00000181299.2/319783, intron 1 of 1)	13357	4930429H19Rik	chr7	73323546	73323799	254	ORR1E	LTR	ERVL-MaLR	62
chr7	73255083	73255411	329	7.47	7.82	7	0.83	0.000679	0.00655	Up	Distal Intergenic	-54969	4930429H19Rik	chr7	73255077	73255111	35	(CA)n	Simple_repeat	Simple_repeat	28
chr7	73255083	73255411	329	7.47	7.82	7	0.83	0.000679	0.00655	Up	Distal Intergenic	-54969	4930429H19Rik	chr7	73255205	73255496	292	IAPEY3C_LTR	LTR	ERVK	206
chr7	73325828	73325952	125	4.95	5.67	3.44	2.23	5.08e-07	1.19e-05	Up	Intron (ENSMUST00000181299.2/319783, intron 1 of 1)	15448	4930429H19Rik	.	.	.	.	.	.	.	.
chr10	95557432	95557525	94	6.32	6.69	5.82	0.87	0.00495	0.032	Up	Promoter (1-2kb)	1796	Mir3058	chr10	95557405	95557591	187	B2_Mm2	SINE	B2	93
chr12	109595823	109596113	291	5.19	5.68	4.44	1.25	0.000497	0.00506	Up	Promoter (<=1kb)	-426	Mir3071	.	.	.	.	.	.	.	.
chr2	30753263	30753479	217	6.63	7.39	4.96	2.42	4.52e-15	3.09e-13	Up	Distal Intergenic	32053	Mir3089	.	.	.	.	.	.	.	.
chr2	30756117	30756232	116	5.17	6.04	2.65	3.38	9.32e-13	5.11e-11	Up	Distal Intergenic	34907	Mir3089	chr2	30756081	30756221	141	B3A	SINE	B2	104
chr2	30756117	30756232	116	5.17	6.04	2.65	3.38	9.32e-13	5.11e-11	Up	Distal Intergenic	34907	Mir3089	chr2	30756223	30756274	52	(CA)n	Simple_repeat	Simple_repeat	9
chr4	58401956	58402549	594	9	9.33	8.56	0.78	0.00288	0.021	Up	Distal Intergenic	38549	Mir3095	.	.	.	.	.	.	.	.
chr4	58462598	58462860	263	6.98	7.45	6.29	1.17	0.000473	0.00486	Up	Intron (ENSMUST00000107570.1/14745, intron 2 of 2)	-21500	Mir3095	chr4	58462561	58462853	293	B4A	SINE	B4	255
chr4	58415650	58415757	108	3.98	4.55	3.02	1.53	0.00503	0.0324	Up	Distal Intergenic	25341	Mir3095	chr4	58415646	58415817	172	B3A	SINE	B2	107
chr4	58461887	58462116	230	6.2	6.73	5.35	1.37	6.66e-05	0.000911	Up	Intron (ENSMUST00000107570.1/14745, intron 2 of 2)	-20789	Mir3095	.	.	.	.	.	.	.	.
chr8	108946937	108947275	339	5.75	6.62	3.24	3.38	1.49e-16	1.16e-14	Up	Exon (ENSMUST00000220518.1/11906, exon 15 of 16)	10077	Mir3108	.	.	.	.	.	.	.	.
chr3	27598668	27599278	611	7.42	8.04	6.3	1.73	2.16e-09	7.77e-08	Up	Intron (ENSMUST00000195008.5/72007, intron 4 of 26)	-13673	Mir3092	chr3	27598775	27598799	25	(T)n	Simple_repeat	Simple_repeat	24
chr14	25527351	25527724	374	7.16	7.75	6.17	1.58	2.65e-07	6.61e-06	Up	Intron (ENSMUST00000161766.7/328365, intron 2 of 2)	-6715	Mir3075	chr14	25527313	25527446	134	RMER17C2	LTR	ERVK	95
chr14	25526929	25527236	308	6.06	6.46	5.52	0.94	0.00593	0.0368	Up	Intron (ENSMUST00000161766.7/328365, intron 2 of 2)	-7203	Mir3075	.	.	.	.	.	.	.	.
chr15	76285600	76285708	109	5.35	5.8	4.7	1.11	0.00152	0.0126	Up	Intron (ENSMUST00000074173.3/74281, intron 4 of 4)	5260	Mir3079	chr15	76285570	76285748	179	B2_Mm2	SINE	B2	108
chr10	23715243	23715369	127	4.38	5.04	3.09	1.95	0.000156	0.00189	Up	Distal Intergenic	70106	Snora33	chr10	23715229	23715405	177	B3A	SINE	B2	126
chr9	103398457	103398937	481	6.07	6.66	5.06	1.6	5.24e-06	9.72e-05	Up	Distal Intergenic	-24641	5830418P13Rik	chr9	103398456	103398478	23	AT_rich	Low_complexity	Low_complexity	21
chr9	103398457	103398937	481	6.07	6.66	5.06	1.6	5.24e-06	9.72e-05	Up	Distal Intergenic	-24641	5830418P13Rik	chr9	103398907	103398978	72	MIRc	SINE	MIR	30
chr5	63951765	63951962	198	5.69	6.06	5.19	0.87	0.00592	0.0367	Up	Intron (ENSMUST00000154169.3/100532, intron 1 of 6)	16861	Rell1	.	.	.	.	.	.	.	.
chr5	63953396	63953955	560	8.17	8.78	7.1	1.68	3.22e-10	1.3e-08	Up	Intron (ENSMUST00000154169.3/100532, intron 1 of 6)	14868	Rell1	.	.	.	.	.	.	.	.
chr5	120942187	120942361	175	4.52	5.22	3.08	2.14	2.9e-05	0.000442	Up	Exon (ENSMUST00000079204.8/19894, exon 22 of 22)	27651	Oas1d	.	.	.	.	.	.	.	.
chr5	120938563	120938972	410	6.74	7.56	4.63	2.93	5.26e-18	4.63e-16	Up	Downstream (1-2kb)	24027	Oas1d	chr5	120938689	120938781	93	MER117	DNA	hAT-Charlie	92
chr5	120938563	120938972	410	6.74	7.56	4.63	2.93	5.26e-18	4.63e-16	Up	Downstream (1-2kb)	24027	Oas1d	chr5	120938762	120938923	162	MER117	DNA	hAT-Charlie	161
chr5	120952484	120952667	184	4.7	5.37	3.4	1.97	0.000228	0.00262	Up	Intron (ENSMUST00000079204.8/19894, intron 13 of 21)	37948	Oas1d	chr5	120952492	120952601	110	L2a	LINE	L2	109
chr5	144411690	144412121	432	7.54	7.95	6.97	0.98	0.000169	0.00203	Up	Intron (ENSMUST00000155491.7/55950, intron 3 of 3)	53165	Dmrt1i	.	.	.	.	.	.	.	.
chr5	144381917	144382049	133	4.65	5.43	2.84	2.59	1.05e-07	2.85e-06	Up	Intron (ENSMUST00000155491.7/55950, intron 3 of 3)	23392	Dmrt1i	chr5	144381834	144382060	227	B3A	SINE	B2	132
chr5	144384061	144384187	127	4.08	4.92	1.79	3.13	6.88e-06	0.000124	Up	Intron (ENSMUST00000155491.7/55950, intron 3 of 3)	25536	Dmrt1i	chr5	144384109	144384258	150	B3	SINE	B2	78
chr9	9104547	9105066	520	7.47	7.99	6.64	1.35	4.78e-07	1.13e-05	Up	Intron (ENSMUST00000093893.11/71544, intron 4 of 22)	-131222	Gm16833	.	.	.	.	.	.	.	.
chr9	9093105	9093528	424	7.82	8.14	7.42	0.72	0.00461	0.0303	Up	Intron (ENSMUST00000093893.11/71544, intron 4 of 22)	-142760	Gm16833	chr9	9093278	9093432	155	L3b	LINE	CR1	154
chr5	105620484	105620754	271	5.22	5.85	4.04	1.81	5.23e-06	9.7e-05	Up	Distal Intergenic	61626	Lrrc8c	.	.	.	.	.	.	.	.
chr5	105585878	105586431	554	7.84	8.14	7.46	0.68	0.00853	0.0485	Up	Intron (ENSMUST00000067924.12/100604, intron 3 of 3)	27020	Lrrc8c	.	.	.	.	.	.	.	.
chr5	105609741	105610040	300	6.19	6.73	5.34	1.38	9.02e-06	0.000157	Up	3' UTR	50883	Lrrc8c	.	.	.	.	.	.	.	.
chr5	105530570	105530880	311	5.74	6.27	4.89	1.38	1.19e-05	0.000202	Up	Intron (ENSMUST00000067924.12/100604, intron 1 of 3)	11097	Lrrc8c	.	.	.	.	.	.	.	.
chr5	105557511	105558266	756	9.67	9.98	9.27	0.72	0.000801	0.00749	Up	Promoter (<=1kb)	-592	Lrrc8c	chr5	105557336	105557615	280	ORR1D2	LTR	ERVL-MaLR	104
chr5	105605790	105606200	411	8.2	8.58	7.69	0.89	0.00204	0.016	Up	Intron (ENSMUST00000067924.12/100604, intron 3 of 3)	46932	Lrrc8c	chr5	105605911	105605957	47	Tigger19a	DNA	TcMar-Tigger	46
chr5	135373804	135373890	87	5.11	5.88	3.34	2.54	6.57e-09	2.2e-07	Up	Promoter (<=1kb)	162	Nsun5	chr5	135373742	135373914	173	B3	SINE	B2	86
chr15	53689259	53689699	441	6.81	7.23	6.21	1.02	0.00025	0.00283	Up	Intron (ENSMUST00000078673.13/320679, intron 3 of 4)	-74980	Mir28c	.	.	.	.	.	.	.	.
chr15	53562884	53563268	385	6.16	6.58	5.57	1.01	0.000738	0.00701	Up	Intron (ENSMUST00000078673.13/320679, intron 4 of 4)	51011	Mir28c	chr15	53562710	53562891	182	B3	SINE	B2	7
chr3	151096498	151096898	401	9	9.87	6.47	3.4	1.28e-43	8.71e-41	Up	Exon (ENSMUST00000196084.1/ENSMUST00000196084.1, exon 1 of 1)	-72636	Mir3963	chr3	151096441	151096939	499	RLTR10C	LTR	ERVK	400
chr3	150926896	150927037	142	7.99	8.81	5.89	2.91	6.05e-32	1.6e-29	Up	Distal Intergenic	96825	Mir3963	chr3	150926780	150927204	425	RLTR10C	LTR	ERVK	141
chr11	88429861	88429945	85	4.38	5	3.28	1.72	0.000876	0.00807	Up	Intron (ENSMUST00000107909.7/76626, intron 7 of 13)	77088	Mir378b	chr11	88429807	88429999	193	B3	SINE	B2	84
chr11	88369871	88370319	449	6.71	7.09	6.18	0.91	0.00107	0.00949	Up	Intron (ENSMUST00000107909.7/76626, intron 10 of 13)	17098	Mir378b	chr11	88370069	88370184	116	MIR3	SINE	MIR	115
chr8	72958380	72958616	237	5.83	6.31	5.12	1.19	0.000362	0.00388	Up	Intron (ENSMUST00000004497.10/16795, intron 6 of 14)	-57896	Mir28b	.	.	.	.	.	.	.	.
chr8	72919082	72919890	809	9.27	9.56	8.92	0.64	0.00286	0.0208	Up	Intron (ENSMUST00000004497.10/16795, intron 6 of 14)	-96622	Mir28b	.	.	.	.	.	.	.	.
chr19	33085314	33085678	365	9.06	9.91	6.77	3.14	4.17e-38	1.91e-35	Up	Distal Intergenic	-71434	Mir3970	chr19	33085262	33085759	498	RLTR10C	LTR	ERVK	364
chr19	6830232	6830612	381	7	7.62	5.88	1.74	2.45e-07	6.17e-06	Up	Promoter (<=1kb)	-288	Mir5046	.	.	.	.	.	.	.	.
chr19	6829980	6830160	181	5.08	5.5	4.48	1.02	0.00846	0.0482	Up	Promoter (<=1kb)	-36	Mir5046	.	.	.	.	.	.	.	.
chr5	77273186	77273382	197	5.17	5.79	4.04	1.76	5.94e-06	0.000109	Up	Promoter (<=1kb)	429	Mir5098	chr5	77273314	77273428	115	B3A	SINE	B2	68
chr5	77276066	77276206	141	5.42	5.86	4.78	1.08	0.00149	0.0124	Up	Intron (ENSMUST00000080359.11/19712, intron 3 of 3)	3309	Mir5098	chr5	77276025	77276221	197	B3	SINE	B2	140
chr1	34411306	34411652	347	8.92	9.79	6.44	3.35	5.92e-47	4.81e-44	Up	Distal Intergenic	21547	Mir5103	chr1	34411257	34411678	422	RLTR10C	LTR	ERVK	346
chr10	7864985	7865094	110	4.2	4.85	2.97	1.88	0.00157	0.013	Up	Intron (ENSMUST00000039484.5/237256, intron 4 of 5)	28604	Mir5104	.	.	.	.	.	.	.	.
chr10	7841624	7842155	532	8.51	9.07	7.58	1.49	5.13e-11	2.31e-09	Up	Intron (ENSMUST00000039484.5/237256, intron 2 of 5)	5243	Mir5104	.	.	.	.	.	.	.	.
chr10	7861723	7861905	183	5.24	5.7	4.56	1.14	0.0078	0.0453	Up	Intron (ENSMUST00000039484.5/237256, intron 3 of 5)	25342	Mir5104	chr10	7861520	7861732	213	L1M5	LINE	L1	9
chr1	191999040	191999309	270	9.16	9.7	8.26	1.44	4.72e-08	1.36e-06	Up	Promoter (<=1kb)	-406	Mir3473c	chr1	191999000	191999429	430	ORR1D1	LTR	ERVL-MaLR	269
chr1	191995624	191995746	123	5.76	6.39	4.63	1.76	4.02e-06	7.67e-05	Up	Downstream (1-2kb)	2872	Mir3473c	chr1	191995604	191995811	208	B3	SINE	B2	122
chr16	55503398	55503505	108	4.59	5.23	3.42	1.81	4.69e-05	0.000673	Up	Distal Intergenic	8667	Mir5118	chr16	55503375	55503553	179	B3	SINE	B2	107
chr4	44479862	44480054	193	4.49	5.39	1.65	3.74	4.99e-10	1.97e-08	Up	Distal Intergenic	127514	Mir5120	chr4	44479737	44479991	255	Tigger16a	DNA	TcMar-Tigger	129
chr4	44620340	44620511	172	5.11	5.98	2.56	3.42	6.11e-12	3.06e-10	Up	Intron (ENSMUST00000014174.13/18507, intron 6 of 9)	-12772	Mir5120	chr4	44620298	44620491	194	B3A	SINE	B2	151
chr4	44556645	44556996	352	7.93	8.66	6.41	2.25	0.000221	0.00255	Up	Intron (ENSMUST00000014174.13/18507, intron 8 of 9)	50572	Mir5120	chr4	44556634	44556673	40	(TG)n	Simple_repeat	Simple_repeat	28
chr3	28434014	28434132	119	4.2	4.73	3.36	1.37	0.00772	0.045	Up	Intron (ENSMUST00000160934.7/665113, intron 2 of 31)	14071	Mir466q	chr3	28433971	28434154	184	L1MEf	LINE	L1	118
chr3	28485719	28485982	264	5.29	5.76	4.59	1.17	0.00727	0.043	Up	Intron (ENSMUST00000160934.7/665113, intron 2 of 31)	65776	Mir466q	.	.	.	.	.	.	.	.
chr18	82131379	82131543	165	5.67	6.16	4.93	1.23	0.00266	0.0197	Up	Distal Intergenic	-139299	Mir5127	chr18	82131448	82131572	125	RMER15	LTR	ERVL	95
chr18	81496493	81496858	366	6.33	6.67	5.89	0.78	0.00627	0.0384	Up	Distal Intergenic	495222	Mir5127	chr18	81496501	81496695	195	Zaphod3	DNA	hAT-Tip100	194
chr18	81838848	81839378	531	7.17	7.53	6.69	0.84	0.00198	0.0156	Up	Distal Intergenic	152702	Mir5127	chr18	81839272	81839333	62	G-rich	Low_complexity	Low_complexity	61
chr18	81838848	81839378	531	7.17	7.53	6.69	0.84	0.00198	0.0156	Up	Distal Intergenic	152702	Mir5127	chr18	81839333	81839520	188	GA-rich	Low_complexity	Low_complexity	45
chr18	82132039	82132404	366	7.06	7.51	6.41	1.1	0.000258	0.00291	Up	Distal Intergenic	-139959	Mir5127	.	.	.	.	.	.	.	.
chr14	102718660	102718891	232	6.1	6.45	5.64	0.81	0.00584	0.0364	Up	Distal Intergenic	263741	Mir5130	chr14	102718517	102718972	456	MLT1E2	LTR	ERVL-MaLR	231
chr15	29284537	29284687	151	7.36	8.11	5.71	2.4	4.85e-16	3.58e-14	Up	Distal Intergenic	428717	Mir3964	chr15	29284410	29284841	432	RLTR10C	LTR	ERVK	150
chr15	29291173	29291398	226	7.63	8.38	5.99	2.39	3.74e-18	3.34e-16	Up	Distal Intergenic	422006	Mir3964	chr15	29291088	29291519	432	RLTR10C	LTR	ERVK	225
chr12	75901873	75902002	130	4.21	4.81	3.16	1.65	0.00149	0.0124	Up	Intron (ENSMUST00000044217.15/319565, intron 11 of 115)	-7101	Mir5101	chr12	75901867	75902040	174	B3A	SINE	B2	129
chr12	75893531	75893686	156	5.81	6.38	4.87	1.51	4.18e-06	7.94e-05	Up	Intron (ENSMUST00000044217.15/319565, intron 9 of 115)	-15417	Mir5101	chr12	75893525	75893718	194	B2_Mm2	SINE	B2	155
chr10	97436550	97437108	559	8.34	8.65	7.94	0.71	0.00282	0.0206	Up	Distal Intergenic	13072	Mir3966	chr10	97436359	97437206	848	RMER19B	LTR	ERVK	558
chr5	109929461	109929594	134	5.18	6.09	2.08	4.01	3.63e-13	2.08e-11	Up	Intron (ENSMUST00000112544.7/100642166, intron 1 of 3)	-3969	Gm15446	.	.	.	.	.	.	.	.
chr5	109892397	109892731	335	8.19	8.63	7.54	1.09	0.000151	0.00185	Up	Distal Intergenic	-30669	Gm15446	chr5	109892277	109892849	573	RLTR6B_Mm	LTR	ERV1	334
chr16	84550569	84550663	95	4.2	4.83	3.05	1.78	0.000498	0.00507	Up	Distal Intergenic	-152504	Mir155hg	chr16	84550515	84550726	212	B3A	SINE	B2	94
chr5	104538460	104538960	501	6.77	7.33	5.84	1.5	3.61e-07	8.75e-06	Up	Promoter (1-2kb)	-1611	D930016D06Rik	.	.	.	.	.	.	.	.
chr5	104539447	104539585	139	5	5.61	3.9	1.71	5.31e-05	0.00075	Up	Promoter (<=1kb)	-986	D930016D06Rik	chr5	104539376	104539533	158	RSINE1	SINE	B4	86
chr5	144866932	144867199	268	5.85	6.29	5.21	1.08	0.00376	0.0259	Up	Distal Intergenic	9656	Trrap	chr5	144866718	144867007	290	L1M3d	LINE	L1	75
chr5	144866932	144867199	268	5.85	6.29	5.21	1.08	0.00376	0.0259	Up	Distal Intergenic	9656	Trrap	chr5	144867042	144867213	172	B3A	SINE	B2	157
chr5	114176979	114177108	130	6.72	7.44	5.23	2.21	2.55e-11	1.19e-09	Up	Promoter (1-2kb)	1073	Acacb	chr5	114176938	114177120	183	B2_Mm2	SINE	B2	129
chr5	114175546	114176180	635	9.45	9.72	9.12	0.6	0.00678	0.0408	Up	Promoter (<=1kb)	0	Acacb	.	.	.	.	.	.	.	.
chr5	114162213	114162849	637	8.03	8.42	7.5	0.92	0.000775	0.00729	Up	Intron (ENSMUST00000102582.7/100705, intron 1 of 52)	-2669	Acacb	chr5	114162051	114162477	427	RMER2	LTR	ERV1	264
chr5	114162213	114162849	637	8.03	8.42	7.5	0.92	0.000775	0.00729	Up	Intron (ENSMUST00000102582.7/100705, intron 1 of 52)	-2669	Acacb	chr5	114162477	114162501	25	RSINE1	SINE	B4	24
chr5	114162213	114162849	637	8.03	8.42	7.5	0.92	0.000775	0.00729	Up	Intron (ENSMUST00000102582.7/100705, intron 1 of 52)	-2669	Acacb	chr5	114162501	114162523	23	(TTTTTG)n	Simple_repeat	Simple_repeat	22
chr5	114162213	114162849	637	8.03	8.42	7.5	0.92	0.000775	0.00729	Up	Intron (ENSMUST00000102582.7/100705, intron 1 of 52)	-2669	Acacb	chr5	114162656	114162732	77	B4	SINE	B4	76
chr5	114162213	114162849	637	8.03	8.42	7.5	0.92	0.000775	0.00729	Up	Intron (ENSMUST00000102582.7/100705, intron 1 of 52)	-2669	Acacb	chr5	114162732	114162866	135	B2_Mm1t	SINE	B2	117
chr13	93214708	93214966	259	8.97	9.79	6.88	2.91	1.98e-28	3.96e-26	Up	Distal Intergenic	-22323	Tent2	chr13	93214602	93215023	422	RLTR10C	LTR	ERVK	258
chr13	93162455	93162809	355	6.66	7.17	5.88	1.28	3.09e-06	6.07e-05	Up	Intron (ENSMUST00000225868.1/100715, intron 10 of 14)	5620	Tent2	chr13	93162333	93163356	1024	ORR1D1-int	LTR	ERVL-MaLR	354
chr5	30853565	30853876	312	7.01	7.33	6.59	0.74	0.00766	0.0447	Up	Promoter (<=1kb)	0	Mapre3	chr5	30853586	30853636	51	(CA)n	Simple_repeat	Simple_repeat	50
chr5	114071011	114071154	144	4.74	5.4	3.48	1.92	1.22e-05	0.000205	Up	Intron (ENSMUST00000162506.1/ENSMUST00000162506.1, intron 1 of 2)	5497	Usp30	chr5	114070973	114071177	205	B3	SINE	B2	143
chr5	29560818	29560946	129	5.09	5.74	3.86	1.89	7.91e-06	0.00014	Up	Distal Intergenic	-8296	Ube3c	chr5	29560774	29560952	179	B3	SINE	B2	128
chr5	29561755	29561862	108	6.64	7.47	4.45	3.03	8.05e-23	1.03e-20	Up	Distal Intergenic	-7380	Ube3c	chr5	29561539	29561903	365	RLTR10C	LTR	ERVK	107
chr5	29641401	29641693	293	5.98	6.61	4.85	1.76	6.26e-07	1.44e-05	Up	Intron (ENSMUST00000049453.8/100763, intron 17 of 22)	50572	Ube3c	chr5	29641231	29641844	614	RMER6A	LTR	ERVK	292
chr5	29574398	29574688	291	6.3	7.05	4.64	2.41	7.52e-15	5.04e-13	Up	Intron (ENSMUST00000049453.8/100763, intron 1 of 22)	4912	Ube3c	chr5	29574260	29574739	480	RLTR45	LTR	ERVK	290
chr6	103964916	103965062	147	6.82	7.49	5.53	1.96	8.02e-12	3.96e-10	Up	Promoter (<=1kb)	-277	Pou5f1-rs5	chr6	103964752	103965187	436	MMERGLN_LTR	LTR	ERV1	146
chr13	120093068	120093205	138	5.96	6.32	5.48	0.84	0.006	0.0371	Up	Distal Intergenic	-40874	Gm21188	.	.	.	.	.	.	.	.
chr5	15490131	15490726	596	8.95	9.32	8.45	0.88	3.44e-05	0.000513	Up	Distal Intergenic	38496	Gm21190	.	.	.	.	.	.	.	.
chr5	15506683	15507273	591	8.33	8.6	8.01	0.59	0.00585	0.0364	Up	Distal Intergenic	21949	Gm21190	chr5	15500000	15506974	6975	IAPEY4_I-int	LTR	ERVK	291
chr5	15506683	15507273	591	8.33	8.6	8.01	0.59	0.00585	0.0364	Up	Distal Intergenic	21949	Gm21190	chr5	15506974	15507254	281	IAPEY4_LTR	LTR	ERVK	280
chr4	41873974	41874138	165	7.11	7.81	5.69	2.12	1.31e-14	8.54e-13	Up	Distal Intergenic	-29472	Gm21541	chr4	41871688	41877123	5436	ETnERV-int	LTR	ERVK	164
chr3	127107299	127107717	419	7.3	7.67	6.81	0.85	0.002	0.0157	Up	Intron (ENSMUST00000182078.8/109676, intron 2 of 45)	-53587	LOC100862268	.	.	.	.	.	.	.	.
chr3	127156203	127156350	148	5.56	6.03	4.86	1.17	0.000834	0.00774	Up	Intron (ENSMUST00000182078.8/109676, intron 2 of 45)	-4954	LOC100862268	.	.	.	.	.	.	.	.
chr14	69557562	69557824	263	6.51	6.96	5.84	1.12	0.00282	0.0206	Up	Promoter (2-3kb)	2096	Entpd4b	.	.	.	.	.	.	.	.
chr14	69339331	69339522	192	6.37	6.84	5.69	1.15	0.00328	0.0233	Up	Promoter (2-3kb)	2115	Entpd4b	.	.	.	.	.	.	.	.
chr14	69423966	69424246	281	7.42	7.86	6.78	1.09	0.000344	0.00372	Up	Intron (ENSMUST00000111062.3/ENSMUST00000111062.3, intron 2 of 13)	61407	Entpd4b	.	.	.	.	.	.	.	.
chr8	98572755	98573442	688	8.88	9.22	8.45	0.77	0.00182	0.0146	Up	Distal Intergenic	-438444	Gm15679	.	.	.	.	.	.	.	.
chr8	97940662	97941011	350	9.09	9.92	6.96	2.95	7e-36	2.64e-33	Up	Distal Intergenic	-1070875	Gm15679	chr8	97940610	97941032	423	RLTR10C	LTR	ERVK	349
chr8	98772253	98772350	98	6.57	7.03	5.9	1.13	0.00196	0.0155	Up	Distal Intergenic	-239536	Gm15679	chr8	98771906	98772390	485	IAPLTR2_Mm	LTR	ERVK	97
chr8	98980677	98980882	206	8.09	8.86	6.34	2.51	2.73e-23	3.63e-21	Up	Distal Intergenic	-31004	Gm15679	chr8	98980517	98981017	501	RLTR10C	LTR	ERVK	205
chr8	98262199	98262404	206	4.83	5.29	4.16	1.13	0.0045	0.0297	Up	Distal Intergenic	-749482	Gm15679	chr8	98261991	98262515	525	RLTR12A	LTR	ERVK	205
chr14	46505409	46505523	115	4.48	5.44	0.28	5.16	6.41e-10	2.49e-08	Up	Intron (ENSMUST00000227980.1/ENSMUST00000227980.1, intron 2 of 2)	70324	Rubie	chr14	46505357	46505561	205	B3	SINE	B2	114
chr4	149538933	149539190	258	5.95	6.3	5.49	0.82	0.00765	0.0446	Up	Promoter (1-2kb)	1070	Mir5616	chr4	149538645	149538939	295	B4A	SINE	B4	6
chr4	149538933	149539190	258	5.95	6.3	5.49	0.82	0.00765	0.0446	Up	Promoter (1-2kb)	1070	Mir5616	chr4	149538991	149539040	50	(CCTG)n	Simple_repeat	Simple_repeat	49
chr9	7777762	7777904	143	4.47	5.22	2.8	2.42	9.07e-07	2.02e-05	Up	Intron (ENSMUST00000052865.15/71929, intron 2 of 4)	-6486	Mir5618	chr9	7777726	7778011	286	ORR1B2	LTR	ERVL-MaLR	142
chr9	7801246	7801627	382	7.73	8.14	7.15	0.99	4.08e-05	0.000596	Up	Distal Intergenic	16856	Mir5618	chr9	7800758	7804868	4111	MMETn-int	LTR	ERVK	381
chr19	58064440	58064888	449	7.39	7.98	6.37	1.62	1.01e-09	3.82e-08	Up	Intron (ENSMUST00000077282.5/226255, intron 28 of 28)	13273	Mir5623	.	.	.	.	.	.	.	.
chr19	57876193	57876403	211	4.57	5.28	3.15	2.13	0.000137	0.0017	Up	Intron (ENSMUST00000077282.5/226255, intron 26 of 28)	-174764	Mir5623	chr19	57876203	57876390	188	B3	SINE	B2	187
chr19	58104539	58105014	476	9.19	9.61	8.59	1.02	2.98e-05	0.000451	Up	Intron (ENSMUST00000077282.5/226255, intron 28 of 28)	53372	Mir5623	.	.	.	.	.	.	.	.
chr19	58100463	58100662	200	6.38	7.1	4.84	2.27	1.48e-12	7.95e-11	Up	Intron (ENSMUST00000077282.5/226255, intron 28 of 28)	49296	Mir5623	chr19	58100367	58101036	670	RMER19A	LTR	ERVK	199
chr19	57920980	57921197	218	4.67	5.26	3.66	1.6	0.000385	0.00409	Up	Intron (ENSMUST00000077282.5/226255, intron 26 of 28)	-129970	Mir5623	chr19	57920931	57920998	68	(CACTG)n	Simple_repeat	Simple_repeat	18
chr19	57920980	57921197	218	4.67	5.26	3.66	1.6	0.000385	0.00409	Up	Intron (ENSMUST00000077282.5/226255, intron 26 of 28)	-129970	Mir5623	chr19	57920998	57921158	161	RMER6C	LTR	ERVK	160
chr19	58016937	58017549	613	7.93	8.29	7.46	0.83	0.000515	0.00521	Up	Intron (ENSMUST00000077282.5/226255, intron 27 of 28)	-33618	Mir5623	.	.	.	.	.	.	.	.
chr13	93866660	93867001	342	7.04	7.4	6.56	0.84	0.00551	0.0348	Up	Intron (ENSMUST00000091403.5/11881, intron 5 of 7)	75883	Mir5624	chr13	93866292	93866800	509	MLTR31F_MM	LTR	ERVK	140
chr13	93866660	93867001	342	7.04	7.4	6.56	0.84	0.00551	0.0348	Up	Intron (ENSMUST00000091403.5/11881, intron 5 of 7)	75883	Mir5624	chr13	93866816	93866885	70	MTD	LTR	ERVL-MaLR	69
chr13	93866660	93867001	342	7.04	7.4	6.56	0.84	0.00551	0.0348	Up	Intron (ENSMUST00000091403.5/11881, intron 5 of 7)	75883	Mir5624	chr13	93866969	93867039	71	ORR1F	LTR	ERVL-MaLR	32
chr9	70391776	70392020	245	5.43	6.22	3.5	2.72	1.64e-10	6.89e-09	Up	Intron (ENSMUST00000214042.1/71602, intron 27 of 28)	13733	Mir5626	chr9	70391712	70391914	203	B3	SINE	B2	138
chr7	62140582	62140697	116	7.89	8.53	6.7	1.84	1.67e-14	1.08e-12	Up	Intron (ENSMUST00000208965.1/ENSMUST00000208965.1, intron 15 of 21)	-55272	Mir344i	chr7	62140529	62140820	292	IAP1-MM_LTR	LTR	ERVK	115
chr7	62211821	62212084	264	7.88	8.63	6.17	2.46	8.86e-18	7.62e-16	Up	Distal Intergenic	-126511	Mir344i	chr7	62211734	62212162	429	RLTR10C	LTR	ERVK	263
chr5	130310233	130310345	113	4.08	4.91	1.97	2.94	1.08e-06	2.37e-05	Up	Intron (ENSMUST00000040213.12/100929, intron 13 of 15)	51303	Tyw1	chr5	130310227	130310419	193	B3A	SINE	B2	112
chr5	130267114	130267556	443	6.85	7.52	5.57	1.95	7.86e-11	3.44e-09	Up	Intron (ENSMUST00000044204.11/100929, intron 4 of 8)	8184	Tyw1	chr5	130267104	130267242	139	B3A	SINE	B2	128
chr5	130267114	130267556	443	6.85	7.52	5.57	1.95	7.86e-11	3.44e-09	Up	Intron (ENSMUST00000044204.11/100929, intron 4 of 8)	8184	Tyw1	chr5	130267250	130267279	30	(CA)n	Simple_repeat	Simple_repeat	29
chr5	130267114	130267556	443	6.85	7.52	5.57	1.95	7.86e-11	3.44e-09	Up	Intron (ENSMUST00000044204.11/100929, intron 4 of 8)	8184	Tyw1	chr5	130267418	130267528	111	PB1D7	SINE	Alu	110
chr5	130266810	130266925	116	4.99	5.82	2.86	2.96	3.11e-09	1.09e-07	Up	Intron (ENSMUST00000044204.11/100929, intron 3 of 8)	7880	Tyw1	.	.	.	.	.	.	.	.
chr5	130272492	130272639	148	5.29	5.91	4.16	1.76	4.48e-06	8.45e-05	Up	Intron (ENSMUST00000044204.11/100929, intron 6 of 8)	13562	Tyw1	chr5	130272416	130272661	246	B3	SINE	B2	147
chr5	130273057	130273394	338	6.39	6.93	5.52	1.41	3.32e-07	8.12e-06	Up	Intron (ENSMUST00000044204.11/100929, intron 6 of 8)	14127	Tyw1	chr5	130272888	130273079	192	ID_B1	SINE	B4	22
chr5	130264321	130265163	843	8.66	9.09	8.04	1.06	9.12e-05	0.0012	Up	Intron (ENSMUST00000044204.11/100929, intron 3 of 8)	5391	Tyw1	chr5	130264427	130264591	165	RSINE1	SINE	B4	164
chr5	130264321	130265163	843	8.66	9.09	8.04	1.06	9.12e-05	0.0012	Up	Intron (ENSMUST00000044204.11/100929, intron 3 of 8)	5391	Tyw1	chr5	130264610	130264682	73	ID_B1	SINE	B4	72
chr5	130264321	130265163	843	8.66	9.09	8.04	1.06	9.12e-05	0.0012	Up	Intron (ENSMUST00000044204.11/100929, intron 3 of 8)	5391	Tyw1	chr5	130264760	130264895	136	MER21C	LTR	ERVL	135
chr5	40733687	40734128	442	6.04	6.4	5.57	0.83	0.00708	0.0422	Up	Distal Intergenic	893374	Rab28	chr5	40733532	40733813	282	MTEb	LTR	ERVL-MaLR	126
chr5	40733687	40734128	442	6.04	6.4	5.57	0.83	0.00708	0.0422	Up	Distal Intergenic	893374	Rab28	chr5	40733883	40733926	44	(T)n	Simple_repeat	Simple_repeat	43
chr5	40733687	40734128	442	6.04	6.4	5.57	0.83	0.00708	0.0422	Up	Distal Intergenic	893374	Rab28	chr5	40733926	40733960	35	MTEb	LTR	ERVL-MaLR	34
chr5	72528943	72529168	226	5.71	6.25	4.82	1.44	6.05e-06	0.00011	Up	3' UTR	-4284	Nfxl1	.	.	.	.	.	.	.	.
chr5	119550950	119551234	285	5.67	6.44	3.93	2.5	7.93e-11	3.47e-09	Up	Distal Intergenic	19528	AW549542	.	.	.	.	.	.	.	.
chr5	119553548	119553943	396	6.01	6.61	4.94	1.67	1.02e-05	0.000175	Up	Distal Intergenic	16819	AW549542	.	.	.	.	.	.	.	.
chr5	119467280	119467960	681	8.5	8.87	8	0.86	0.000742	0.00705	Up	Distal Intergenic	102802	AW549542	chr5	119467745	119467935	191	ORR1E	LTR	ERVL-MaLR	190
chr5	119467280	119467960	681	8.5	8.87	8	0.86	0.000742	0.00705	Up	Distal Intergenic	102802	AW549542	chr5	119467879	119468160	282	MT2B	LTR	ERVL	81
chr6	6279783	6279911	129	4.64	5.57	1.32	4.25	2.11e-11	1e-09	Up	Intron (ENSMUST00000181633.1/101056138, intron 1 of 2)	-19510	Gm20619	chr6	6279810	6279975	166	B3	SINE	B2	101
chr16	92383542	92383692	151	4.87	5.53	3.61	1.92	4.18e-06	7.94e-05	Up	Promoter (<=1kb)	-859	Gm29805	chr16	92383561	92383728	168	B3	SINE	B2	131
chr6	113406743	113406954	212	5.57	6.18	4.5	1.69	5.2e-07	1.22e-05	Up	Promoter (2-3kb)	-2252	Ttll3	chr6	113406680	113406761	82	RSINE1	SINE	B4	18
chr6	113406743	113406954	212	5.57	6.18	4.5	1.69	5.2e-07	1.22e-05	Up	Promoter (2-3kb)	-2252	Ttll3	chr6	113406689	113406763	75	B3A	SINE	B2	20
chr6	113406743	113406954	212	5.57	6.18	4.5	1.69	5.2e-07	1.22e-05	Up	Promoter (2-3kb)	-2252	Ttll3	chr6	113406763	113406947	185	B3	SINE	B2	184
chr6	127517717	127517894	178	8.14	8.6	7.48	1.12	1.41e-05	0.000234	Up	Distal Intergenic	40062	Parp11	chr6	127514349	127520169	5821	MMETn-int	LTR	ERVK	177
chr6	47963146	47963467	322	5.76	6.16	5.21	0.95	0.00208	0.0163	Up	3' UTR	9699	Zfp956	.	.	.	.	.	.	.	.
chr6	113362541	113362771	231	5.15	5.58	4.53	1.05	0.00457	0.0301	Up	Distal Intergenic	8371	Tada3	.	.	.	.	.	.	.	.
chr6	119504155	119504253	99	5.49	6.03	4.61	1.43	3.2e-05	0.000481	Up	Intron (ENSMUST00000178696.7/22419, intron 1 of 4)	24487	Fbxl14	chr6	119504171	119504330	160	B2_Mm2	SINE	B2	82
chr7	16688822	16689124	303	6.68	7.54	4.15	3.4	7.69e-20	7.76e-18	Up	Distal Intergenic	-13117	Ceacam15	chr7	16688668	16689236	569	RMER19B2	LTR	ERVK	302
chr7	16689295	16689665	371	6.82	7.69	4.3	3.38	4.17e-26	6.76e-24	Up	Distal Intergenic	-13590	Ceacam15	.	.	.	.	.	.	.	.
chr7	130891745	130892066	322	5.81	6.43	4.7	1.72	1.04e-05	0.000179	Up	Intron (ENSMUST00000120441.7/101476, intron 4 of 12)	-4925	Plekha1	chr7	130891695	130891827	133	B3	SINE	B2	82
chr7	28362576	28362822	247	6.32	6.72	5.76	0.97	0.00417	0.0281	Up	Promoter (<=1kb)	519	Plekhg2	.	.	.	.	.	.	.	.
chr7	43788114	43788525	412	8.02	8.53	7.23	1.3	1.07e-07	2.89e-06	Up	Intron (ENSMUST00000181454.6/100504720, intron 1 of 6)	-3366	Klk9	chr7	43788018	43788127	110	L2c	LINE	L2	13
chr7	24587408	24587798	391	7.36	7.67	6.96	0.71	0.00797	0.0461	Up	Promoter (<=1kb)	0	Zfp575	.	.	.	.	.	.	.	.
chr7	47025444	47025722	279	6.45	6.8	6	0.79	0.00243	0.0184	Up	Distal Intergenic	-17033	Spty2d1	.	.	.	.	.	.	.	.
chr7	79555774	79555897	124	5.11	5.52	4.54	0.97	0.00809	0.0466	Up	Exon (ENSMUST00000206829.1/ENSMUST00000206829.1, exon 2 of 2)	27924	Mir9-3hg	.	.	.	.	.	.	.	.
chr7	101971902	101972048	147	6.25	6.67	5.66	1.01	0.00478	0.0312	Up	Promoter (1-2kb)	1163	Numa1	.	.	.	.	.	.	.	.
chr7	28635327	28635592	266	5.78	6.56	3.97	2.58	2.54e-10	1.04e-08	Up	Intron (ENSMUST00000208431.1/ENSMUST00000208431.1, intron 1 of 1)	-3995	Acp7	chr7	28635238	28635373	136	B1_Mus1	SINE	Alu	46
chr7	28635327	28635592	266	5.78	6.56	3.97	2.58	2.54e-10	1.04e-08	Up	Intron (ENSMUST00000208431.1/ENSMUST00000208431.1, intron 1 of 1)	-3995	Acp7	chr7	28635373	28635502	130	RLTR17B_Mm	LTR	ERVK	129
chr7	28635327	28635592	266	5.78	6.56	3.97	2.58	2.54e-10	1.04e-08	Up	Intron (ENSMUST00000208431.1/ENSMUST00000208431.1, intron 1 of 1)	-3995	Acp7	chr7	28635502	28635752	251	L1ME3A	LINE	L1	90
chr7	28617639	28617781	143	4.65	5.31	3.36	1.96	3.49e-05	0.000519	Up	Intron (ENSMUST00000040112.3/101744, intron 2 of 12)	12719	Acp7	chr7	28617643	28617741	99	B1_Mur1	SINE	Alu	98
chr7	28645294	28645788	495	6.91	7.41	6.14	1.27	1.3e-05	0.000218	Up	Exon (ENSMUST00000209122.1/ENSMUST00000209122.1, exon 2 of 2)	-13962	Acp7	chr7	28645319	28645464	146	B1_Mur3	SINE	Alu	145
chr7	28645294	28645788	495	6.91	7.41	6.14	1.27	1.3e-05	0.000218	Up	Exon (ENSMUST00000209122.1/ENSMUST00000209122.1, exon 2 of 2)	-13962	Acp7	chr7	28645633	28645678	46	ID4_	SINE	ID	45
chr7	28645294	28645788	495	6.91	7.41	6.14	1.27	1.3e-05	0.000218	Up	Exon (ENSMUST00000209122.1/ENSMUST00000209122.1, exon 2 of 2)	-13962	Acp7	chr7	28645692	28645771	80	ZP3AR	Satellite	Satellite	79
chr7	144696846	144697319	474	7.13	7.72	6.1	1.62	6.41e-08	1.81e-06	Up	Intron (ENSMUST00000121758.7/101772, intron 1 of 25)	-17961	Ano1	chr7	144697196	144697225	30	(TGGGGG)n	Simple_repeat	Simple_repeat	29
chr7	144670042	144670208	167	4.87	5.62	3.26	2.36	1.09e-07	2.96e-06	Up	Promoter (<=1kb)	-662	Ano1	chr7	144670025	144670209	185	B3	SINE	B2	166
chr7	115123449	115123551	103	4.3	5.01	2.87	2.14	0.000185	0.0022	Up	Distal Intergenic	172142	A730082K24Rik	chr7	115123419	115123584	166	ORR1D2	LTR	ERVL-MaLR	102
chr7	114992504	114992785	282	6.61	7.03	6.03	0.99	0.000815	0.0076	Up	Distal Intergenic	41197	A730082K24Rik	.	.	.	.	.	.	.	.
chr7	97514865	97515129	265	4.82	5.47	3.64	1.83	0.000278	0.0031	Up	Intron (ENSMUST00000026126.9/101861, intron 12 of 22)	13086	Ints4	chr7	97514721	97514929	209	B3	SINE	B2	64
chr7	97514865	97515129	265	4.82	5.47	3.64	1.83	0.000278	0.0031	Up	Intron (ENSMUST00000026126.9/101861, intron 12 of 22)	13086	Ints4	chr7	97514931	97515123	193	B4A	SINE	B4	192
chr7	97535920	97536237	318	5.13	5.82	3.76	2.06	1.51e-06	3.2e-05	Up	Promoter (<=1kb)	610	Ints4	chr7	97535936	97536598	663	RMER6A	LTR	ERVK	301
chr7	80332427	80332635	209	7.44	7.96	6.64	1.32	4.46e-05	0.000644	Up	Intron (ENSMUST00000107368.7/101869, intron 10 of 20)	6931	Unc45a	chr7	80332371	80332629	259	ORR1D1	LTR	ERVL-MaLR	202
chr7	80332427	80332635	209	7.44	7.96	6.64	1.32	4.46e-05	0.000644	Up	Intron (ENSMUST00000107368.7/101869, intron 10 of 20)	6931	Unc45a	chr7	80332629	80332655	27	(TC)n	Simple_repeat	Simple_repeat	6
chr8	110825041	110825355	315	5.91	6.39	5.18	1.21	0.000154	0.00188	Up	Exon (ENSMUST00000212515.1/101943, exon 13 of 13)	13241	Sf3b3	chr8	110825041	110825157	117	PB1D7	SINE	Alu	116
chr8	105374593	105374908	316	6.87	7.56	5.48	2.07	6.81e-11	3.01e-09	Up	Promoter (<=1kb)	0	Plekhg4	.	.	.	.	.	.	.	.
chr8	86231942	86232253	312	6.59	7.14	5.69	1.45	7.92e-05	0.00106	Up	Distal Intergenic	196296	Phkb	chr8	86232123	86232301	179	MTD	LTR	ERVL-MaLR	130
chr8	3375880	3376005	126	3.99	4.91	0.79	4.13	7.43e-08	2.07e-06	Up	Intron (ENSMUST00000208363.1/319493, intron 1 of 8)	-17001	Arhgef18	chr8	3375905	3376008	104	B3A	SINE	B2	100
chr8	3417983	3418445	463	8.17	8.47	7.8	0.67	0.00603	0.0373	Up	Intron (ENSMUST00000131773.7/102098, intron 1 of 11)	-18566	Arhgef18	chr8	3417833	3418054	222	ID_B1	SINE	B4	71
chr8	40986971	40987146	176	5.69	6.39	4.31	2.07	8.31e-09	2.74e-07	Up	Intron (ENSMUST00000034004.9/68797, intron 4 of 5)	13059	Mtus1	chr8	40986942	40987129	188	B3	SINE	B2	158
chr8	40998767	40998967	201	6.34	6.71	5.84	0.86	0.00326	0.0231	Up	Promoter (1-2kb)	1238	Mtus1	chr8	40998755	40998902	148	B1F	SINE	Alu	135
chr8	94572027	94572253	227	5.94	6.4	5.24	1.17	0.00106	0.00944	Up	Downstream (1-2kb)	7592	Fam192a	.	.	.	.	.	.	.	.
chr8	120067883	120068433	551	7.26	7.69	6.63	1.06	0.000539	0.00542	Up	Intron (ENSMUST00000127664.1/108148, intron 1 of 15)	18402	Zdhhc7	.	.	.	.	.	.	.	.
chr8	123112976	123113193	218	6.56	6.96	6.01	0.95	0.00224	0.0173	Up	Intron (ENSMUST00000127664.1/108148, intron 1 of 15)	-4181	Cpne7	chr8	123112857	123113381	525	RMER19A	LTR	ERVK	217
chr8	13283372	13283451	80	5.07	5.81	3.48	2.33	1.72e-08	5.35e-07	Up	Promoter (1-2kb)	-1780	Dcun1d2	chr8	13283320	13283522	203	B3	SINE	B2	79
chr9	71554166	71554274	109	3.81	4.69	1.17	3.52	3.29e-06	6.41e-05	Up	Exon (ENSMUST00000163708.1/102371, exon 6 of 12)	25611	Myzap	chr9	71554097	71554300	204	B3A	SINE	B2	108
chr9	123388651	123388830	180	6.08	6.89	4.07	2.82	7.83e-17	6.23e-15	Up	Intron (ENSMUST00000038863.8/102436, intron 3 of 20)	10915	Lars2	chr9	123388431	123388767	337	IAPLTR1a_Mm	LTR	ERVK	116
chr9	123388651	123388830	180	6.08	6.89	4.07	2.82	7.83e-17	6.23e-15	Up	Intron (ENSMUST00000038863.8/102436, intron 3 of 20)	10915	Lars2	chr9	123388767	123388779	13	(G)n	Simple_repeat	Simple_repeat	12
chr9	123447179	123447343	165	6.06	6.54	5.34	1.2	4.61e-05	0.000662	Up	Intron (ENSMUST00000038863.8/102436, intron 14 of 20)	-7163	Lars2	chr9	123447177	123447385	209	B3	SINE	B2	164
chr7	102076816	102076996	181	6.12	6.64	5.28	1.36	2.42e-05	0.000376	Up	Promoter (<=1kb)	899	Xndc1	chr7	102076809	102076971	163	B2_Mm2	SINE	B2	155
chr9	119382710	119382838	129	4.49	5.03	3.63	1.4	0.00229	0.0175	Up	Intron (ENSMUST00000039610.9/102448, intron 14 of 18)	4519	Xylb	.	.	.	.	.	.	.	.
chr9	119385517	119385801	285	9.41	10.24	7.22	3.03	1.46e-37	6.54e-35	Up	Intron (ENSMUST00000039610.9/102448, intron 15 of 18)	7326	Xylb	chr9	119385434	119385855	422	RLTR10C	LTR	ERVK	284
chr14	117879416	117879658	243	6.23	6.79	5.3	1.48	5.35e-06	9.9e-05	Up	Intron (ENSMUST00000088483.9/23888, intron 6 of 9)	74189	Mir6239	.	.	.	.	.	.	.	.
chr14	117610266	117610654	389	5.78	6.29	4.97	1.32	0.000195	0.0023	Up	Intron (ENSMUST00000123239.1/23888, intron 3 of 3)	343193	Mir6239	chr14	117609955	117610275	321	ORR1A2	LTR	ERVL-MaLR	9
chr14	117610266	117610654	389	5.78	6.29	4.97	1.32	0.000195	0.0023	Up	Intron (ENSMUST00000123239.1/23888, intron 3 of 3)	343193	Mir6239	chr14	117610438	117610479	42	(TTTTG)n	Simple_repeat	Simple_repeat	41
chr14	117610266	117610654	389	5.78	6.29	4.97	1.32	0.000195	0.0023	Up	Intron (ENSMUST00000123239.1/23888, intron 3 of 3)	343193	Mir6239	chr14	117610647	117610985	339	L1M3	LINE	L1	7
chr2	56509267	56509440	174	7.13	7.95	5.1	2.85	2.12e-20	2.25e-18	Up	Distal Intergenic	-276371	Mir195b	chr2	56509166	56509454	289	RLTR10C	LTR	ERVK	173
chr2	29457797	29457931	135	4.24	4.84	3.21	1.63	0.0075	0.044	Up	Intron (ENSMUST00000028139.10/68975, intron 3 of 7)	17363	Mir133c	chr2	29457843	29457990	148	B3A	SINE	B2	88
chr1	118822398	118822521	124	4.81	5.63	2.69	2.95	2.69e-08	8.1e-07	Up	Distal Intergenic	-131699	Mir6346	chr1	118822348	118822516	169	B3A	SINE	B2	118
chr18	59868458	59868557	100	7.4	8.21	5.38	2.83	1.53e-23	2.06e-21	Up	Distal Intergenic	288828	Mir6355	chr18	59868260	59868667	408	RLTR10C	LTR	ERVK	99
chr18	59729636	59729841	206	7.19	7.92	5.68	2.24	4.44e-19	4.23e-17	Up	Distal Intergenic	150006	Mir6355	chr18	59729444	59729941	498	RLTR10C	LTR	ERVK	205
chr18	68782066	68782335	270	7.87	8.72	5.54	3.18	1.36e-32	3.77e-30	Up	Distal Intergenic	42666	Mir6356	chr18	68781915	68782412	498	RLTR10C	LTR	ERVK	269
chr18	68681751	68681869	119	3.77	4.5	2.21	2.28	0.00032	0.0035	Up	Distal Intergenic	-57531	Mir6356	chr18	68681691	68681872	182	B3	SINE	B2	118
chr18	68778761	68778918	158	6.6	7.32	5.1	2.22	4.87e-13	2.75e-11	Up	Distal Intergenic	39361	Mir6356	chr18	68778621	68779052	432	RLTR10C	LTR	ERVK	157
chr18	23781988	23782531	544	7.22	7.81	6.19	1.62	7.24e-08	2.02e-06	Up	Intron (ENSMUST00000170802.7/212307, intron 2 of 7)	-6999	Mir6360	.	.	.	.	.	.	.	.
chr16	91534602	91534743	142	7.78	8.11	7.35	0.76	0.00388	0.0265	Up	Distal Intergenic	-7058	Mir6367	.	.	.	.	.	.	.	.
chr3	140120026	140120177	152	7.42	7.92	6.65	1.27	2e-06	4.11e-05	Up	Distal Intergenic	91777	Mir7j	chr3	140120009	140120363	355	IAPLTR1_Mm	LTR	ERVK	151
chr3	140124932	140125089	158	7.46	7.95	6.72	1.23	2.78e-07	6.92e-06	Up	Distal Intergenic	96683	Mir7j	chr3	140121666	140124938	3273	IAPEz-int	LTR	ERVK	6
chr3	140124932	140125089	158	7.46	7.95	6.72	1.23	2.78e-07	6.92e-06	Up	Distal Intergenic	96683	Mir7j	chr3	140124940	140125294	355	IAPLTR1_Mm	LTR	ERVK	149
chr3	47384081	47384267	187	8.29	9.08	6.4	2.68	1.05e-24	1.55e-22	Up	Distal Intergenic	-483299	Mir6379	chr3	47384002	47384400	399	RLTR10C	LTR	ERVK	186
chr14	46968104	46968288	185	5.9	6.38	5.16	1.23	7.67e-05	0.00103	Up	Intron (ENSMUST00000022386.14/74480, intron 2 of 12)	-13176	Mir378c	chr14	46968127	46968210	84	(CCTG)n	Simple_repeat	Simple_repeat	83
chr14	46966263	46966547	285	7.62	8.1	6.89	1.21	2.68e-05	0.000412	Up	Intron (ENSMUST00000022386.14/74480, intron 2 of 12)	-11335	Mir378c	.	.	.	.	.	.	.	.
chr14	105649931	105650668	738	6.99	7.33	6.56	0.76	0.0026	0.0194	Up	Distal Intergenic	-26161	Mir6390	chr14	105649836	105650187	352	ORR1C2	LTR	ERVL-MaLR	256
chr14	105662944	105663201	258	5.64	6.25	4.56	1.68	9.44e-07	2.1e-05	Up	Distal Intergenic	-39174	Mir6390	.	.	.	.	.	.	.	.
chr14	105757244	105758016	773	8.67	9.5	6.49	3.01	1.84e-32	5.02e-30	Up	Distal Intergenic	-133474	Mir6390	chr14	105756894	105757370	477	MLTR11B	LTR	ERVK	126
chr14	105757244	105758016	773	8.67	9.5	6.49	3.01	1.84e-32	5.02e-30	Up	Distal Intergenic	-133474	Mir6390	chr14	105757371	105757801	431	RLTR10C	LTR	ERVK	430
chr14	105757244	105758016	773	8.67	9.5	6.49	3.01	1.84e-32	5.02e-30	Up	Distal Intergenic	-133474	Mir6390	chr14	105757804	105758184	381	MMERVK10C-int	LTR	ERVK	212
chr14	105675075	105675378	304	5.96	6.44	5.26	1.18	0.000228	0.00262	Up	Distal Intergenic	-51305	Mir6390	.	.	.	.	.	.	.	.
chr14	105668930	105669352	423	8.4	8.8	7.85	0.96	0.000284	0.00316	Up	Distal Intergenic	-45160	Mir6390	.	.	.	.	.	.	.	.
chr14	118605039	118605172	134	5.14	5.71	4.19	1.52	0.000284	0.00316	Up	Intron (ENSMUST00000036554.13/239273, intron 13 of 30)	-12567	Mir6391	chr14	118605027	118605202	176	B2_Mm2	SINE	B2	133
chr15	87717123	87717438	316	7.25	7.59	6.8	0.78	0.0036	0.025	Up	Intron (ENSMUST00000230414.1/106014, intron 2 of 3)	78505	Mir6393	.	.	.	.	.	.	.	.
chr15	88017013	88017476	464	8.15	8.62	7.45	1.16	6.4e-05	0.000881	Up	Distal Intergenic	-221070	Mir6393	.	.	.	.	.	.	.	.
chr15	87883774	87884025	252	5.73	6.13	5.18	0.95	0.00496	0.032	Up	Distal Intergenic	-87831	Mir6393	chr15	87883835	87884027	193	B3	SINE	B2	190
chr15	87883774	87884025	252	5.73	6.13	5.18	0.95	0.00496	0.032	Up	Distal Intergenic	-87831	Mir6393	chr15	87883569	87883830	262	L1M3	LINE	L1	56
chr15	87988360	87988991	632	5.73	6.2	5.03	1.16	0.00127	0.0109	Up	Exon (ENSMUST00000229118.1/ENSMUST00000229118.1, exon 2 of 2)	-192417	Mir6393	.	.	.	.	.	.	.	.
chr8	34369409	34369731	323	6.44	7.02	5.45	1.57	3.17e-08	9.42e-07	Up	Distal Intergenic	-202697	Mir6395	chr8	34369256	34370344	1089	Lx8	LINE	L1	322
chr8	34174862	34175243	382	6.22	6.83	5.14	1.69	2.06e-08	6.34e-07	Up	Distal Intergenic	-8150	Mir6395	chr8	34174828	34175148	321	LTR16D2	LTR	ERVL	286
chr8	34372336	34373015	680	7.35	7.72	6.85	0.87	0.00168	0.0136	Up	Distal Intergenic	-205624	Mir6395	chr8	34372480	34372533	54	(CACG)n	Simple_repeat	Simple_repeat	53
chr8	34209424	34209822	399	9.08	9.88	7.15	2.73	1.19e-26	2.02e-24	Up	Distal Intergenic	-42712	Mir6395	chr8	34209338	34209903	566	RLTR10C	LTR	ERVK	398
chr4	108079840	108080090	251	4.84	5.46	3.73	1.73	0.000535	0.00537	Up	Intron (ENSMUST00000044248.13/242608, intron 1 of 11)	-7267	Mir6397	.	.	.	.	.	.	.	.
chr4	123607336	123607439	104	4.94	5.79	2.69	3.1	3.69e-11	1.69e-09	Up	Intron (ENSMUST00000097897.10/11426, intron 1 of 97)	-8981	Mir6398	chr4	123607280	123607461	182	B3	SINE	B2	103
chr4	134569342	134569453	112	5.34	5.95	4.29	1.65	0.000119	0.0015	Up	Promoter (1-2kb)	-1491	Mir6403	chr4	134569280	134569466	187	B3	SINE	B2	111
chr4	134589072	134589384	313	6.59	7.12	5.76	1.35	2.35e-06	4.75e-05	Up	Intron (ENSMUST00000038628.3/230815, intron 5 of 12)	-21221	Mir6403	.	.	.	.	.	.	.	.
chr7	143960539	143960913	375	8.43	9.09	7.19	1.9	5.21e-14	3.23e-12	Up	Distal Intergenic	27424	Mir6404	chr7	143960229	143960823	595	RMER6C	LTR	ERVK	284
chr7	143960539	143960913	375	8.43	9.09	7.19	1.9	5.21e-14	3.23e-12	Up	Distal Intergenic	27424	Mir6404	chr7	143960823	143960848	26	(CACTG)n	Simple_repeat	Simple_repeat	25
chr7	143960539	143960913	375	8.43	9.09	7.19	1.9	5.21e-14	3.23e-12	Up	Distal Intergenic	27424	Mir6404	chr7	143960848	143961169	322	RMER6C	LTR	ERVK	65
chr19	16366369	16367019	651	7.15	7.44	6.78	0.67	0.00862	0.0489	Up	Intron (ENSMUST00000025541.5/14682, intron 5 of 6)	-51365	Mir496b	chr19	16366242	16366379	138	B4A	SINE	B4	10
chr19	16295720	16295879	160	4.28	5	2.76	2.23	1.94e-05	0.00031	Up	Intron (ENSMUST00000025541.5/14682, intron 2 of 6)	19125	Mir496b	chr19	16295538	16295819	282	L1MA4	LINE	L1	99
chr19	16293080	16293303	224	6.45	6.8	5.97	0.83	0.00702	0.0419	Up	Intron (ENSMUST00000025541.5/14682, intron 2 of 6)	21701	Mir496b	.	.	.	.	.	.	.	.
chr11	68231666	68231814	149	4.96	5.78	2.87	2.91	2.96e-10	1.2e-08	Up	Intron (ENSMUST00000021284.3/18208, intron 5 of 6)	10774	Mir6406	chr11	68231648	68231800	153	B3A	SINE	B2	134
chr11	68160591	68160843	253	4.86	5.52	3.63	1.89	9e-05	0.00118	Up	Intron (ENSMUST00000021285.13/55943, intron 7 of 7)	-60049	Mir6406	chr11	68160533	68160743	211	B3A	SINE	B2	152
chr11	68160591	68160843	253	4.86	5.52	3.63	1.89	9e-05	0.00118	Up	Intron (ENSMUST00000021285.13/55943, intron 7 of 7)	-60049	Mir6406	chr11	68160801	68160932	132	B1F	SINE	Alu	42
chr10	126663565	126663719	155	5.3	6.07	3.57	2.5	8.53e-10	3.26e-08	Up	Distal Intergenic	46672	Mir378d	chr10	126663573	126663740	168	B3A	SINE	B2	146
chr10	126679309	126679513	205	5.4	6.13	3.82	2.31	4.66e-08	1.34e-06	Up	Distal Intergenic	30878	Mir378d	chr10	126679370	126679493	124	B3A	SINE	B2	123
chr10	126386563	126386716	154	4.78	5.61	2.63	2.98	2e-09	7.26e-08	Up	Distal Intergenic	323675	Mir378d	chr10	126386537	126386741	205	B3	SINE	B2	153
chr10	126713661	126713828	168	4.73	5.28	3.84	1.43	0.0047	0.0308	Up	Distal Intergenic	-3270	Mir378d	.	.	.	.	.	.	.	.
chr10	126458274	126458908	635	8.74	9.35	7.64	1.71	3.78e-13	2.16e-11	Up	Distal Intergenic	251483	Mir378d	chr10	126458193	126458443	251	Lx8	LINE	L1	169
chr10	126458274	126458908	635	8.74	9.35	7.64	1.71	3.78e-13	2.16e-11	Up	Distal Intergenic	251483	Mir378d	chr10	126458443	126459067	625	RMER19A	LTR	ERVK	465
chr10	126661185	126661560	376	7.94	8.56	6.82	1.74	1.6e-07	4.19e-06	Up	Distal Intergenic	48831	Mir378d	.	.	.	.	.	.	.	.
chr17	64467073	64467160	88	3.79	4.52	2.23	2.3	0.000756	0.00714	Up	Distal Intergenic	26267	Mir6420	.	.	.	.	.	.	.	.
chr11	117083956	117084146	191	6.44	7.18	4.81	2.37	5.03e-14	3.13e-12	Up	Distal Intergenic	6608	Mir6516	chr11	117083883	117084020	138	B1_Mus1	SINE	Alu	64
chr11	117083534	117083777	244	6.13	6.84	4.68	2.16	1.73e-11	8.27e-10	Up	Distal Intergenic	6186	Mir6516	chr11	117083737	117083814	78	ID4	SINE	ID	40
chr14	62881755	62882128	374	7.6	7.91	7.19	0.72	0.00482	0.0314	Up	Intron (ENSMUST00000014691.9/268752, intron 1 of 11)	16213	Mir6541	chr14	62881709	62881947	239	RMER5	LTR	ERV1	192
chr1	36129197	36129445	249	5.46	6.1	4.25	1.86	1.33e-06	2.86e-05	Up	Distal Intergenic	14868	Mir6897	.	.	.	.	.	.	.	.
chr1	36130307	36130619	313	7.35	7.93	6.36	1.57	5.26e-07	1.23e-05	Up	Distal Intergenic	13694	Mir6897	.	.	.	.	.	.	.	.
chr10	128506068	128506218	151	5.03	5.68	3.82	1.86	2.51e-05	0.000389	Up	Distal Intergenic	5812	Mir6916	chr10	128506041	128506241	201	B3	SINE	B2	150
chr10	128575188	128575338	151	5.27	5.93	4.01	1.92	5.38e-06	9.95e-05	Up	Intron (ENSMUST00000082059.6/13867, intron 16 of 27)	9159	Mir6917	chr10	128575145	128575346	202	B3	SINE	B2	150
chr11	60195221	60195326	106	5.28	5.96	3.98	1.97	4.6e-07	1.09e-05	Up	Intron (ENSMUST00000064190.12/19377, intron 4 of 5)	5291	Mir6921	chr11	60195195	60195367	173	B3A	SINE	B2	105
chr11	119159565	119159756	192	5.33	5.88	4.43	1.45	0.000447	0.00464	Up	Intron (ENSMUST00000036113.3/207592, intron 3 of 11)	-5428	Mir6934	chr11	119159530	119159671	142	B4A	SINE	B4	106
chr11	119159565	119159756	192	5.33	5.88	4.43	1.45	0.000447	0.00464	Up	Intron (ENSMUST00000036113.3/207592, intron 3 of 11)	-5428	Mir6934	chr11	119159741	119159840	100	B4	SINE	B4	15
chr13	55475894	55476033	140	6.23	6.64	5.64	1	0.000959	0.00869	Up	Promoter (1-2kb)	1743	Mir6944	chr13	55475712	55475903	192	B2_Mm2	SINE	B2	9
chr15	38418922	38419448	527	6.97	7.42	6.3	1.12	0.00108	0.00957	Up	Distal Intergenic	71099	Mir6951	chr15	38418930	38419060	131	MIR	SINE	MIR	130
chr15	38418922	38419448	527	6.97	7.42	6.3	1.12	0.00108	0.00957	Up	Distal Intergenic	71099	Mir6951	chr15	38419192	38419541	350	MLT1D	LTR	ERVL-MaLR	256
chr15	38461805	38462122	318	6.38	6.86	5.67	1.19	0.000195	0.00229	Up	Distal Intergenic	28425	Mir6951	chr15	38461567	38461869	303	MLTR11A	LTR	ERVK	64
chr17	24244123	24244403	281	5	5.7	3.59	2.12	9.53e-07	2.12e-05	Up	Intron (ENSMUST00000115390.4/12449, intron 3 of 16)	-3176	Mir6965	chr17	24244200	24244326	127	Charlie13b	DNA	hAT-Charlie	126
chr19	3289092	3289619	528	7.21	7.71	6.46	1.25	2.52e-05	0.000389	Up	Promoter (<=1kb)	172	Mir6984	.	.	.	.	.	.	.	.
chr19	4255713	4255839	127	5.14	5.89	3.46	2.44	2.79e-08	8.39e-07	Up	Distal Intergenic	8039	Mir6985	chr19	4255648	4255850	203	B3	SINE	B2	126
chr19	4264501	4264661	161	5.02	5.5	4.3	1.2	0.00274	0.0201	Up	Promoter (<=1kb)	-623	Mir6985	.	.	.	.	.	.	.	.
chr4	139641988	139642143	156	5.66	6.04	5.14	0.9	0.00764	0.0446	Up	Promoter (1-2kb)	-1899	Mir7020	.	.	.	.	.	.	.	.
chr4	139647040	139647200	161	5.83	6.67	3.65	3.01	1.75e-16	1.35e-14	Up	Intron (ENSMUST00000178644.1/212647, intron 24 of 29)	2998	Mir7020	chr4	139647025	139647228	204	B3A	SINE	B2	160
chr4	142967714	142967839	126	4.79	5.61	2.7	2.9	1.54e-08	4.84e-07	Up	Intron (ENSMUST00000211105.1/ENSMUST00000211105.1, intron 1 of 2)	168323	Mir7021	chr4	142967659	142967870	212	B3A	SINE	B2	125
chr4	142953848	142954221	374	6.26	6.74	5.55	1.19	0.00112	0.00987	Up	Intron (ENSMUST00000211105.1/ENSMUST00000211105.1, intron 1 of 2)	181941	Mir7021	.	.	.	.	.	.	.	.
chr4	143073919	143074732	814	7.75	8.18	7.12	1.06	1.75e-05	0.000282	Up	Exon (ENSMUST00000211105.1/ENSMUST00000211105.1, exon 1 of 3)	61430	Mir7021	chr4	143074322	143074353	32	(CAG)n	Simple_repeat	Simple_repeat	31
chr4	142856316	142856889	574	6.91	7.29	6.39	0.9	0.00122	0.0106	Up	Intron (ENSMUST00000211105.1/ENSMUST00000211105.1, intron 1 of 2)	279273	Mir7021	chr4	142856349	142856493	145	B3	SINE	B2	144
chr4	142903487	142903776	290	5.93	6.74	3.89	2.85	1.17e-14	7.71e-13	Up	Intron (ENSMUST00000211105.1/ENSMUST00000211105.1, intron 1 of 2)	232386	Mir7021	chr4	142903455	142903664	210	B3	SINE	B2	177
chr4	143035138	143035352	215	5.25	5.76	4.47	1.29	0.00319	0.0227	Up	Intron (ENSMUST00000211105.1/ENSMUST00000211105.1, intron 1 of 2)	100810	Mir7021	chr4	143035337	143035597	261	B4	SINE	B4	15
chr5	75309606	75309869	264	6.78	7.38	5.75	1.63	1.57e-07	4.12e-06	Up	Distal Intergenic	132775	Mir7025	chr5	75309578	75310043	466	IAPLTR2_Mm	LTR	ERVK	263
chr5	75305313	75305573	261	6.78	7.37	5.78	1.59	1.28e-06	2.77e-05	Up	Distal Intergenic	128482	Mir7025	chr5	75305270	75305734	465	IAPLTR2_Mm	LTR	ERVK	260
chr5	136104602	136104822	221	6.6	7.25	5.39	1.87	1.7e-07	4.42e-06	Up	Promoter (<=1kb)	-700	Mir7035	.	.	.	.	.	.	.	.
chr7	24958649	24958730	82	5.34	5.88	4.48	1.4	6.65e-05	0.00091	Up	Distal Intergenic	11345	Mir7046	chr7	24958586	24958749	164	B2_Mm2	SINE	B2	81
chr7	24985939	24986147	209	4.87	5.5	3.71	1.79	0.000117	0.00148	Up	Promoter (1-2kb)	1520	Mir7047	chr7	24985907	24986104	198	B3A	SINE	B2	165
chr7	24985939	24986147	209	4.87	5.5	3.71	1.79	0.000117	0.00148	Up	Promoter (1-2kb)	1520	Mir7047	chr7	24986118	24986222	105	PB1D10	SINE	Alu	29
chr7	24984429	24984528	100	4.08	4.82	2.49	2.33	0.000158	0.00192	Up	Intron (ENSMUST00000102858.9/232975, intron 16 of 21)	3139	Mir7047	chr7	24984371	24984579	209	B3	SINE	B2	99
chr12	114207317	114207600	284	8.62	9.43	6.63	2.8	1.47e-25	2.29e-23	Up	Distal Intergenic	261866	Mir7094-1	chr12	114207269	114207678	410	RLTR10C	LTR	ERVK	283
chr14	24059692	24060242	551	6.9	7.26	6.4	0.86	0.00365	0.0253	Up	Intron (ENSMUST00000224007.1/ENSMUST00000224007.1, intron 1 of 3)	-28635	Mir7210	chr14	24059590	24059881	292	Kanga1	DNA	TcMar-Tc2	189
chr14	24059692	24060242	551	6.9	7.26	6.4	0.86	0.00365	0.0253	Up	Intron (ENSMUST00000224007.1/ENSMUST00000224007.1, intron 1 of 3)	-28635	Mir7210	chr14	24059899	24060053	155	B3	SINE	B2	154
chr14	24059692	24060242	551	6.9	7.26	6.4	0.86	0.00365	0.0253	Up	Intron (ENSMUST00000224007.1/ENSMUST00000224007.1, intron 1 of 3)	-28635	Mir7210	chr14	24060229	24060631	403	Charlie2a	DNA	hAT-Charlie	13
chr15	25948314	25949122	809	8.62	9.4	6.82	2.58	2.31e-20	2.43e-18	Up	Promoter (<=1kb)	87	Mir7212	chr15	25948808	25948840	33	(GGGA)n	Simple_repeat	Simple_repeat	32
chr15	25948314	25949122	809	8.62	9.4	6.82	2.58	2.31e-20	2.43e-18	Up	Promoter (<=1kb)	87	Mir7212	chr15	25949030	25949060	31	(ATGGTG)n	Simple_repeat	Simple_repeat	30
chr17	27261000	27261168	169	5.22	6.04	3.17	2.87	1.06e-10	4.57e-09	Up	Distal Intergenic	55927	Mir7214	chr17	27260912	27261044	133	ID_B1	SINE	B4	44
chr17	27261000	27261168	169	5.22	6.04	3.17	2.87	1.06e-10	4.57e-09	Up	Distal Intergenic	55927	Mir7214	chr17	27260998	27261140	143	B3	SINE	B2	140
chr17	27261000	27261168	169	5.22	6.04	3.17	2.87	1.06e-10	4.57e-09	Up	Distal Intergenic	55927	Mir7214	chr17	27261140	27261184	45	(CA)n	Simple_repeat	Simple_repeat	28
chr17	27262613	27263036	424	7.2	7.53	6.77	0.77	0.00535	0.034	Up	Distal Intergenic	54059	Mir7214	chr17	27262531	27262648	118	RLTR51A_Mm	LTR	ERVK?	35
chr17	27262613	27263036	424	7.2	7.53	6.77	0.77	0.00535	0.034	Up	Distal Intergenic	54059	Mir7214	chr17	27262648	27262689	42	(GA)n	Simple_repeat	Simple_repeat	41
chr17	27262613	27263036	424	7.2	7.53	6.77	0.77	0.00535	0.034	Up	Distal Intergenic	54059	Mir7214	chr17	27262689	27262848	160	RLTR51A_Mm	LTR	ERVK?	159
chr17	27291776	27292081	306	4.88	5.53	3.63	1.9	1.48e-05	0.000244	Up	Distal Intergenic	25014	Mir7214	.	.	.	.	.	.	.	.
chr18	68212281	68212639	359	6.57	7.25	5.26	2	2.12e-11	1e-09	Up	Intron (ENSMUST00000063775.3/52662, intron 3 of 5)	48334	Mir7219	chr18	68212478	68212837	360	ORR1D2	LTR	ERVL-MaLR	161
chr18	68119971	68120143	173	5.25	5.7	4.6	1.1	0.005	0.0323	Up	Intron (ENSMUST00000063775.3/52662, intron 3 of 5)	140830	Mir7219	chr18	68119753	68120382	630	RMER19B	LTR	ERVK	172
chr5	134576651	134576740	90	3.75	4.58	1.53	3.06	1.77e-05	0.000286	Up	Distal Intergenic	4575	Mir7228	chr5	134576584	134576793	210	B3	SINE	B2	89
chr6	81030429	81030619	191	8.42	9.23	6.44	2.79	1.73e-26	2.9e-24	Up	Distal Intergenic	865044	Mir7232	chr6	81030343	81030773	431	RLTR10C	LTR	ERVK	190
chr6	81446129	81446749	621	6.88	7.56	5.57	2	1.5e-12	8.03e-11	Up	Distal Intergenic	448914	Mir7232	chr6	81446132	81446425	294	ORR1C2	LTR	ERVL-MaLR	293
chr6	81694006	81694563	558	7.89	8.19	7.51	0.68	0.00361	0.0251	Up	Intron (ENSMUST00000203833.1/ENSMUST00000203833.1, intron 1 of 1)	201100	Mir7232	chr6	81693198	81694219	1022	L1Md_F2	LINE	L1	213
chr6	81275163	81275735	573	9.6	10.48	6.97	3.5	1.43e-55	1.97e-52	Up	Distal Intergenic	619928	Mir7232	chr6	81275129	81275562	434	RLTR10C	LTR	ERVK	399
chr6	81275163	81275735	573	9.6	10.48	6.97	3.5	1.43e-55	1.97e-52	Up	Distal Intergenic	619928	Mir7232	chr6	81275565	81275908	344	MMERVK10C-int	LTR	ERVK	170
chr6	81281892	81282217	326	9.37	10.24	6.92	3.32	9.02e-47	7.25e-44	Up	Distal Intergenic	613446	Mir7232	chr6	81281821	81282254	434	RLTR10C	LTR	ERVK	325
chr11	121378804	121378890	87	4.23	4.93	2.81	2.12	0.000178	0.00212	Up	Intron (ENSMUST00000106107.2/217371, intron 1 of 5)	8314	Mir7236	chr11	121378756	121378918	163	B3	SINE	B2	86
chr17	27087418	27087763	346	6.55	6.91	6.05	0.86	0.00278	0.0204	Up	Exon (ENSMUST00000049308.8/16440, exon 7 of 58)	-3482	Mir7677	.	.	.	.	.	.	.	.
chr17	27078023	27078203	181	5.93	6.76	3.78	2.98	1.97e-16	1.51e-14	Up	Intron (ENSMUST00000049308.8/16440, intron 2 of 57)	-13042	Mir7677	chr17	27077905	27078043	139	B1_Mur1	SINE	Alu	20
chr17	27078023	27078203	181	5.93	6.76	3.78	2.98	1.97e-16	1.51e-14	Up	Intron (ENSMUST00000049308.8/16440, intron 2 of 57)	-13042	Mir7677	chr17	27078045	27078222	178	B3	SINE	B2	158
chr17	27085681	27085964	284	6.2	6.55	5.73	0.82	0.00569	0.0356	Up	Intron (ENSMUST00000049308.8/16440, intron 4 of 57)	-5281	Mir7677	chr17	27085661	27085785	125	MIR	SINE	MIR	104
chr17	27085681	27085964	284	6.2	6.55	5.73	0.82	0.00569	0.0356	Up	Intron (ENSMUST00000049308.8/16440, intron 4 of 57)	-5281	Mir7677	chr17	27085796	27086004	209	B3	SINE	B2	168
chr17	27105454	27106322	869	10.74	11.65	7.77	3.88	6.85e-56	1.01e-52	Up	Exon (ENSMUST00000049308.8/16440, exon 29 of 58)	14209	Mir7677	chr17	27105734	27106151	418	C-rich	Low_complexity	Low_complexity	417
chr2	164349067	164349246	180	5.63	6.05	5.02	1.03	0.00264	0.0196	Up	Distal Intergenic	5137	Mir7678	chr2	164349237	164349315	79	L1M2	LINE	L1	9
chr1	171630977	171631364	388	6.6	7.25	5.41	1.84	1.04e-09	3.92e-08	Up	Downstream (1-2kb)	10536	Mir7683	chr1	171630934	171631140	207	B3	SINE	B2	163
chr1	171631564	171631716	153	5.09	5.87	3.28	2.58	7.61e-10	2.92e-08	Up	Downstream (<1kb)	10184	Mir7683	.	.	.	.	.	.	.	.
chr10	93422066	93422222	157	5.2	5.97	3.45	2.52	4.53e-09	1.56e-07	Up	Distal Intergenic	-10885	Mir7688	chr10	93421998	93422321	324	L1MA8	LINE	L1	156
chr10	93421834	93421969	136	4.69	5.52	2.55	2.97	9.3e-09	3.03e-07	Up	Distal Intergenic	-11138	Mir7688	chr10	93421771	93421992	222	B3	SINE	B2	135
chr16	22554935	22555301	367	6.48	7.09	5.4	1.69	2.92e-09	1.03e-07	Up	Intron (ENSMUST00000089925.9/110197, intron 19 of 24)	-22751	Mir8095	chr16	22555079	22555266	188	B3	SINE	B2	187
chr16	22554935	22555301	367	6.48	7.09	5.4	1.69	2.92e-09	1.03e-07	Up	Intron (ENSMUST00000089925.9/110197, intron 19 of 24)	-22751	Mir8095	chr16	22555296	22555432	137	B1_Mus1	SINE	Alu	5
chr14	62845199	62845492	294	5.42	5.88	4.74	1.15	0.00258	0.0193	Up	Intron (ENSMUST00000014691.9/268752, intron 1 of 11)	7478	Mir8098	.	.	.	.	.	.	.	.
chr12	94670114	94670574	461	6.48	6.9	5.87	1.03	0.00148	0.0123	Up	Distal Intergenic	742776	Mir8099-1	chr12	94670331	94670357	27	(T)n	Simple_repeat	Simple_repeat	26
chr12	94670114	94670574	461	6.48	6.9	5.87	1.03	0.00148	0.0123	Up	Distal Intergenic	742776	Mir8099-1	chr12	94670527	94670613	87	BC1_Mm	scRNA	scRNA	47
chr11	97064021	97064159	139	5.38	5.96	4.41	1.54	3.03e-05	0.000459	Up	Promoter (<=1kb)	253	Mir8103	chr11	97064010	97064230	221	B3	SINE	B2	138
chr8	88885429	88885780	352	8.67	9.45	6.85	2.6	3.21e-33	9.44e-31	Up	Distal Intergenic	-138955	Mir8110	chr8	88885437	88885852	416	RLTR10C	LTR	ERVK	343
chr4	33544920	33545050	131	5.03	5.5	4.34	1.16	0.00868	0.0491	Up	Distal Intergenic	106839	Mir8118	.	.	.	.	.	.	.	.
chr4	33581983	33582283	301	7.11	7.53	6.53	1	6e-05	0.000834	Up	Distal Intergenic	143902	Mir8118	.	.	.	.	.	.	.	.
chr4	33446340	33446579	240	4.97	5.43	4.28	1.15	0.00328	0.0232	Up	Intron (ENSMUST00000108153.8/24018, intron 14 of 15)	8259	Mir8118	chr4	33446296	33446409	114	B3A	SINE	B2	69
chr4	33446340	33446579	240	4.97	5.43	4.28	1.15	0.00328	0.0232	Up	Intron (ENSMUST00000108153.8/24018, intron 14 of 15)	8259	Mir8118	chr4	33446478	33446615	138	B4A	SINE	B4	101
chr4	33500175	33500405	231	5.93	6.28	5.46	0.82	0.00667	0.0402	Up	3' UTR	62094	Mir8118	.	.	.	.	.	.	.	.
chr9	110276053	110276140	88	3.97	4.74	2.22	2.51	3.44e-05	0.000512	Up	Distal Intergenic	-5147	Mir6236	chr9	110276041	110276216	176	B3	SINE	B2	87
chr1	12171639	12172139	501	8.14	8.75	7.08	1.67	1.98e-10	8.23e-09	Up	Distal Intergenic	-253847	Mir6341	chr1	12171530	12171972	443	RLTR1B	LTR	ERV1	333
chr1	12171639	12172139	501	8.14	8.75	7.08	1.67	1.98e-10	8.23e-09	Up	Distal Intergenic	-253847	Mir6341	chr1	12171972	12172458	487	L1_Mus2	LINE	L1	167
chr2	17622236	17622646	411	7.37	7.86	6.6	1.26	7.71e-06	0.000137	Up	Intron (ENSMUST00000028080.11/74103, intron 2 of 6)	58722	Mir6419	chr2	17622434	17622829	396	MTA_Mm	LTR	ERVL-MaLR	212
chr10	62679947	62680079	133	4.47	5.29	2.43	2.86	1.03e-07	2.79e-06	Up	Promoter (2-3kb)	-2429	Mir7215	chr10	62679911	62680077	167	B3	SINE	B2	130
chr9	9783819	9783903	85	4.05	4.68	2.88	1.81	0.000965	0.00873	Up	Intron (ENSMUST00000162484.7/244682, intron 11 of 20)	-110528	Mir6237	chr9	9783745	9783937	193	B2_Mm2	SINE	B2	84
chr3	35171591	35172113	523	10.01	10.89	7.4	3.49	3.54e-48	3.1e-45	Up	Distal Intergenic	-248940	Mir6378	chr3	35171521	35172019	499	RLTR10C	LTR	ERVK	428
chr18	61134477	61135124	648	6.97	7.3	6.53	0.76	0.00307	0.022	Up	Intron (ENSMUST00000091884.4/106894, intron 19 of 20)	17009	Mir6983	.	.	.	.	.	.	.	.
chr17	27359503	27359870	368	6.18	6.64	5.5	1.14	0.000314	0.00344	Up	Promoter (1-2kb)	1406	Mir7218	.	.	.	.	.	.	.	.
chr17	27382547	27382729	183	4.42	5.22	2.43	2.79	4.79e-07	1.13e-05	Up	Distal Intergenic	24450	Mir7218	.	.	.	.	.	.	.	.
chr17	27377315	27377414	100	4.65	5.39	3	2.4	3.6e-06	6.96e-05	Up	Distal Intergenic	19218	Mir7218	chr17	27377281	27377445	165	B3	SINE	B2	99
chr17	27389238	27389944	707	8.06	8.57	7.27	1.3	6.3e-05	0.00087	Up	Distal Intergenic	31141	Mir7218	.	.	.	.	.	.	.	.
chr17	27382987	27383163	177	5.08	5.77	3.72	2.06	1.48e-06	3.14e-05	Up	Distal Intergenic	24890	Mir7218	chr17	27382747	27383587	841	RMER19B	LTR	ERVK	176
chr17	27393572	27393655	84	5.07	5.58	4.26	1.32	0.000471	0.00484	Up	Distal Intergenic	35475	Mir7218	chr17	27393552	27393742	191	B3	SINE	B2	83
chr2	158245217	158245349	133	5.56	6.12	4.63	1.49	0.000347	0.00374	Up	Promoter (1-2kb)	-1652	Mir7685	.	.	.	.	.	.	.	.
chr2	158236641	158237025	385	6.17	6.75	5.16	1.6	2.23e-06	4.54e-05	Up	Distal Intergenic	6540	Mir7685	chr2	158236786	158236874	89	L1MC	LINE	L1	88
chr2	158236641	158237025	385	6.17	6.75	5.16	1.6	2.23e-06	4.54e-05	Up	Distal Intergenic	6540	Mir7685	chr2	158236901	158236959	59	ORR1F	LTR	ERVL-MaLR	58
chr2	158236641	158237025	385	6.17	6.75	5.16	1.6	2.23e-06	4.54e-05	Up	Distal Intergenic	6540	Mir7685	chr2	158236959	158237323	365	ORR1D1	LTR	ERVL-MaLR	66
chr2	158248052	158248728	677	8.68	9.14	7.99	1.15	0.000209	0.00244	Up	Distal Intergenic	-4487	Mir7685	chr2	158248063	158248246	184	L1MD3	LINE	L1	183
chr1	81653133	81653251	119	3.73	4.35	2.61	1.74	0.00762	0.0445	Up	Distal Intergenic	-478665	Mir6344	chr1	81653121	81653287	167	MER121	DNA	TcMar?	118
chr1	39189326	39189696	371	9.12	9.97	6.72	3.25	2.84e-39	1.43e-36	Up	Promoter (2-3kb)	-2334	Mir6349	chr1	39189298	39189508	211	RLTR10C	LTR	ERVK	182
chr1	39189326	39189696	371	9.12	9.97	6.72	3.25	2.84e-39	1.43e-36	Up	Promoter (2-3kb)	-2334	Mir6349	chr1	39189508	39189564	57	(GA)n	Simple_repeat	Simple_repeat	56
chr1	39189326	39189696	371	9.12	9.97	6.72	3.25	2.84e-39	1.43e-36	Up	Promoter (2-3kb)	-2334	Mir6349	chr1	39189564	39189766	203	RLTR10C	LTR	ERVK	132
chr1	168818524	168818762	239	5.8	6.37	4.86	1.51	1.12e-05	0.000191	Up	Distal Intergenic	200327	Mir6354	chr1	168818476	168818885	410	Lx9	LINE	L1	238
chr6	102746526	102746856	331	6.3	6.82	5.48	1.35	7.09e-06	0.000127	Up	Distal Intergenic	-47528	Mir6373	chr6	102746398	102746931	534	RLTR45	LTR	ERVK	330
chr4	15939865	15940044	180	4.69	5.24	3.77	1.48	0.00126	0.0109	Up	Intron (ENSMUST00000029877.8/67460, intron 1 of 9)	2947	Mir6400	.	.	.	.	.	.	.	.
chr10	20294296	20294561	266	7.99	8.75	6.3	2.45	2.67e-18	2.4e-16	Up	Distal Intergenic	3127	Mir6413	chr10	20294213	20294643	431	RLTR10C	LTR	ERVK	265
chr5	51984658	51984926	269	6.09	6.48	5.55	0.93	0.00143	0.012	Up	Distal Intergenic	151091	Mir6417	chr5	51984568	51984807	240	ORR1F	LTR	ERVL-MaLR	149
chr5	52132086	52132491	406	6.76	7.24	6.03	1.22	2.44e-06	4.91e-05	Up	Distal Intergenic	3526	Mir6417	.	.	.	.	.	.	.	.
chr11	67100180	67100453	274	5.68	6.09	5.1	0.99	0.00135	0.0115	Up	Promoter (<=1kb)	376	Mir6923	.	.	.	.	.	.	.	.
chr15	101185662	101185820	159	5.53	6.34	3.5	2.84	1.49e-12	7.97e-11	Up	Intron (ENSMUST00000000544.11/11479, intron 1 of 8)	-8049	Mir6962	chr15	101185628	101185835	208	B3A	SINE	B2	158
chr19	47275813	47275893	81	5.89	6.6	4.44	2.16	3.51e-10	1.41e-08	Up	Promoter (2-3kb)	-2224	Mir6995	chr19	47275774	47275939	166	B2_Mm2	SINE	B2	80
chr3	36467694	36467972	279	7.28	7.64	6.81	0.83	0.00329	0.0233	Up	Intron (ENSMUST00000029266.13/11747, intron 2 of 12)	7552	Mir7009	.	.	.	.	.	.	.	.
chr7	28562336	28562691	356	6.42	6.92	5.65	1.27	3.48e-05	0.000518	Up	Promoter (1-2kb)	-1352	Mir7049	.	.	.	.	.	.	.	.
chr8	71634422	71634577	156	6.32	6.74	5.72	1.02	0.000866	0.00799	Up	Exon (ENSMUST00000030170.14/382018, exon 41 of 44)	-3316	Mir6769b	.	.	.	.	.	.	.	.
chr8	71633248	71633513	266	7.06	7.84	5.29	2.55	1.54e-16	1.19e-14	Up	Promoter (2-3kb)	-2142	Mir6769b	chr8	71633511	71633585	75	G-rich	Low_complexity	Low_complexity	2
chr17	27324979	27325470	492	8.88	9.5	7.75	1.75	3.57e-08	1.05e-06	Up	Exon (ENSMUST00000232285.1/ENSMUST00000232285.1, exon 1 of 2)	-2915	Mir7216	.	.	.	.	.	.	.	.
chr2	92530770	92531047	278	7.44	8.07	6.29	1.77	8.85e-09	2.9e-07	Up	Intron (ENSMUST00000142249.2/ENSMUST00000142249.2, intron 4 of 5)	-61159	Mir7221	.	.	.	.	.	.	.	.
chr5	113335638	113336076	439	6.61	6.99	6.1	0.89	0.00434	0.0289	Up	Promoter (1-2kb)	1569	Mir7230	.	.	.	.	.	.	.	.
chr5	113332391	113332544	154	5.71	6.57	3.28	3.3	9.1e-17	7.18e-15	Up	Distal Intergenic	5101	Mir7230	chr5	113332379	113332554	176	B3	SINE	B2	153
chr9	67662761	67662975	215	4.71	5.23	3.89	1.34	0.00359	0.0249	Up	Distal Intergenic	64805	Mir7241	chr9	67662763	67663124	362	RLTR31C_MM	LTR	ERVK	212
chr1	151449964	151450129	166	3.98	4.58	2.94	1.64	0.00344	0.0242	Up	3' UTR	7571	Mir7682	.	.	.	.	.	.	.	.
chr1	85760639	85760849	211	7.67	8.39	6.2	2.18	1.38e-16	1.07e-14	Up	Intron (ENSMUST00000159122.7/319997, intron 3 of 7)	8691	Mir8096	chr1	85760532	85760950	419	RLTR10C	LTR	ERVK	210
chr4	138154106	138154246	141	5.46	5.94	4.74	1.2	0.000529	0.00533	Up	Intron (ENSMUST00000084215.11/230861, intron 13 of 33)	-8963	Mir6399	chr4	138154090	138154262	173	B2_Mm2	SINE	B2	140
chr8	111680476	111680896	421	6.72	7.1	6.2	0.9	0.00846	0.0482	Up	Distal Intergenic	8778	Mir7076	chr8	111680338	111680515	178	B2_Mm1t	SINE	B2	39
chr8	111680476	111680896	421	6.72	7.1	6.2	0.9	0.00846	0.0482	Up	Distal Intergenic	8778	Mir7076	chr8	111680746	111681005	260	B4A	SINE	B4	150
chr8	111676357	111676506	150	4.86	5.56	3.45	2.11	1.14e-06	2.5e-05	Up	Distal Intergenic	13168	Mir7076	chr8	111676341	111676508	168	B3	SINE	B2	149
chr1	171063919	171066028	2110	13.18	13.5	12.77	0.73	0.00118	0.0103	Up	Promoter (<=1kb)	0	Mir6546	chr1	171064163	171064235	73	tRNA-Glu-GAG_	tRNA	tRNA	72
chr1	171063919	171066028	2110	13.18	13.5	12.77	0.73	0.00118	0.0103	Up	Promoter (<=1kb)	0	Mir6546	chr1	171064387	171064458	72	(TTGGGG)n	Simple_repeat	Simple_repeat	71
chr1	171063919	171066028	2110	13.18	13.5	12.77	0.73	0.00118	0.0103	Up	Promoter (<=1kb)	0	Mir6546	chr1	171064698	171064770	73	tRNA-Gly-GGA	tRNA	tRNA	72
chr1	171063919	171066028	2110	13.18	13.5	12.77	0.73	0.00118	0.0103	Up	Promoter (<=1kb)	0	Mir6546	chr1	171065357	171065429	73	tRNA-Asp-GAY	tRNA	tRNA	72
chr1	171063919	171066028	2110	13.18	13.5	12.77	0.73	0.00118	0.0103	Up	Promoter (<=1kb)	0	Mir6546	chr1	171065983	171066066	84	tRNA-Leu-CTG	tRNA	tRNA	45
chr8	25160048	25160348	301	6.29	6.8	5.51	1.29	1.23e-05	0.000207	Up	Promoter (<=1kb)	-815	Mir8108	.	.	.	.	.	.	.	.
chr8	25151765	25152254	490	7.12	7.7	6.14	1.56	1.38e-08	4.36e-07	Up	Downstream (2-3kb)	6979	Mir8108	chr8	25151953	25152455	503	RMER16	LTR	ERVK	301
chr9	95796474	95796575	102	3.93	4.56	2.79	1.77	0.00217	0.0168	Up	Intron (ENSMUST00000093800.8/102502, intron 1 of 15)	18831	Pls1	chr9	95796410	95796581	172	B3A	SINE	B2	101
chr9	114763472	114763598	127	5.16	5.74	4.19	1.55	7.03e-05	0.000955	Up	Intron (ENSMUST00000035009.15/102545, intron 1 of 4)	11853	Cmtm7	.	.	.	.	.	.	.	.
chr9	114805196	114805638	443	6.85	7.58	5.29	2.29	2.51e-12	1.32e-10	Up	Intron (ENSMUST00000047013.3/70031, intron 1 of 3)	-23340	Cmtm7	.	.	.	.	.	.	.	.
chr9	114809923	114810007	85	5.18	6.02	2.97	3.04	9.44e-13	5.17e-11	Up	Intron (ENSMUST00000047013.3/70031, intron 1 of 3)	-28067	Cmtm7	chr9	114809916	114810063	148	B2_Mm2	SINE	B2	84
chr9	114802339	114802478	140	4.47	5.17	3.06	2.11	2.37e-05	0.000369	Up	Intron (ENSMUST00000047013.3/70031, intron 1 of 3)	-20483	Cmtm7	.	.	.	.	.	.	.	.
chr9	122227184	122227532	349	7.35	7.77	6.75	1.02	0.000248	0.00282	Up	Intron (ENSMUST00000042546.3/102566, intron 11 of 12)	36153	Ano10	.	.	.	.	.	.	.	.
chr9	122204657	122204832	176	5.77	6.54	4.01	2.53	8.87e-13	4.87e-11	Up	Intron (ENSMUST00000042546.3/102566, intron 11 of 12)	-17038	Ano10	chr9	122204620	122204837	218	B3	SINE	B2	175
chr9	50782210	50782444	235	5.15	5.73	4.15	1.59	9.91e-05	0.00129	Up	Intron (ENSMUST00000034561.10/102580, intron 3 of 14)	6101	Alg9	chr9	50782259	50782467	209	B3	SINE	B2	185
chr9	30641844	30641938	95	6.13	6.99	3.72	3.27	3.22e-20	3.34e-18	Up	Distal Intergenic	205987	Snx19	chr9	30641822	30642189	368	IAPLTR1_Mm	LTR	ERVK	94
chr9	57503850	57504613	764	8.27	8.55	7.91	0.64	0.00527	0.0336	Up	Promoter (<=1kb)	0	Rpp25	.	.	.	.	.	.	.	.
chr9	107275834	107276004	171	6.68	7.15	5.99	1.15	0.000491	0.00501	Up	Intron (ENSMUST00000035194.7/102626, intron 2 of 10)	4911	Mapkapk3	.	.	.	.	.	.	.	.
chr9	24982950	24983048	99	4.38	5.03	3.17	1.86	0.000144	0.00177	Up	Intron (ENSMUST00000214469.1/102631612, intron 2 of 4)	8742	E130101E03Rik	chr9	24982891	24983087	197	B3	SINE	B2	98
chr3	52600838	52601618	781	6.44	7.01	5.47	1.54	4.91e-07	1.16e-05	Up	Distal Intergenic	83874	Gm30173	.	.	.	.	.	.	.	.
chr3	52503882	52504299	418	7.17	7.62	6.5	1.11	4.3e-05	0.000623	Up	Distal Intergenic	-12665	Gm30173	chr3	52503863	52503909	47	(CA)n	Simple_repeat	Simple_repeat	27
chr14	53565102	53565653	552	10.97	11.56	9.97	1.59	4.75e-14	2.96e-12	Up	Distal Intergenic	-525636	Gm30214	chr14	53564066	53571583	7518	MMERGLN-int	LTR	ERV1	551
chr14	53303291	53303572	282	7.69	8.27	6.7	1.57	2.21e-06	4.51e-05	Up	Distal Intergenic	-263825	Gm30214	.	.	.	.	.	.	.	.
chr14	53580293	53580407	115	4.72	5.5	2.92	2.58	1.34e-07	3.55e-06	Up	Distal Intergenic	-540827	Gm30214	chr14	53579995	53580789	795	RMER13A1	LTR	ERVK	114
chr14	53571610	53571868	259	8.53	9.34	6.54	2.8	2.06e-26	3.43e-24	Up	Distal Intergenic	-532144	Gm30214	chr14	53571583	53572013	431	MMERGLN_LTR	LTR	ERV1	258
chr14	53301887	53302056	170	5.75	6.12	5.24	0.88	0.00799	0.0462	Up	5' UTR	-262421	Gm30214	.	.	.	.	.	.	.	.
chr14	53334842	53335191	350	7.15	7.48	6.73	0.76	0.0041	0.0276	Up	Distal Intergenic	-295376	Gm30214	.	.	.	.	.	.	.	.
chr14	53370790	53371076	287	7.91	8.72	5.92	2.8	3.34e-25	5.1e-23	Up	Distal Intergenic	-331324	Gm30214	chr14	53370715	53371136	422	RLTR10C	LTR	ERVK	286
chr14	53547493	53547616	124	4.88	5.65	3.06	2.59	6.14e-07	1.42e-05	Up	Distal Intergenic	-508027	Gm30214	.	.	.	.	.	.	.	.
chr14	52992134	52992411	278	7.7	8.29	6.7	1.59	2.33e-06	4.72e-05	Up	Distal Intergenic	47055	Gm30214	.	.	.	.	.	.	.	.
chr14	53615471	53615852	382	7.07	7.77	5.67	2.1	1.22e-10	5.19e-09	Up	Distal Intergenic	-576005	Gm30214	chr14	53615460	53616005	546	Lx8b	LINE	L1	381
chr14	53563539	53563879	341	8.53	9.38	6.18	3.2	9.84e-28	1.81e-25	Up	Distal Intergenic	-524073	Gm30214	chr14	53563095	53563636	542	ETnERV2-int	LTR	ERVK	97
chr14	53563539	53563879	341	8.53	9.38	6.18	3.2	9.84e-28	1.81e-25	Up	Distal Intergenic	-524073	Gm30214	chr14	53563636	53564066	431	MMERGLN_LTR	LTR	ERV1	243
chr10	78747002	78747495	494	7.11	7.54	6.51	1.02	8.85e-05	0.00117	Up	Promoter (<=1kb)	0	Gm30400	.	.	.	.	.	.	.	.
chr10	78745914	78746167	254	6.95	7.62	5.68	1.93	5.67e-11	2.53e-09	Up	Promoter (<=1kb)	-963	Gm30400	chr10	78745913	78746095	183	B3A	SINE	B2	181
chr6	118342100	118342400	301	5.72	6.27	4.82	1.45	0.000592	0.00586	Up	Distal Intergenic	-33716	Gm30498	.	.	.	.	.	.	.	.
chr10	126962366	126962508	143	5.21	5.73	4.4	1.33	0.000307	0.00338	Up	Exon (ENSMUST00000217897.1/ENSMUST00000217897.1, exon 1 of 1)	4343	Gm30539	.	.	.	.	.	.	.	.
chr10	126953075	126953421	347	7.03	7.49	6.35	1.15	0.000299	0.0033	Up	Distal Intergenic	-4602	Gm30539	chr10	126953126	126953384	259	MLT1I	LTR	ERVL-MaLR	258
chr13	103711434	103711897	464	7.97	8.76	6.07	2.69	3.15e-22	3.82e-20	Up	Distal Intergenic	-3801	Gm30551	.	.	.	.	.	.	.	.
chr13	103712529	103712715	187	8.38	9.24	5.99	3.25	2.45e-35	8.76e-33	Up	Distal Intergenic	-4896	Gm30551	chr13	103712451	103712881	431	MMERGLN_LTR	LTR	ERV1	186
chr13	103713934	103714444	511	10.84	11.3	10.15	1.15	3.28e-08	9.74e-07	Up	Distal Intergenic	-6301	Gm30551	chr13	103712881	103720421	7541	MMERGLN-int	LTR	ERV1	510
chr10	4141764	4141967	204	5.52	5.96	4.89	1.07	0.00646	0.0393	Up	Intron (ENSMUST00000117291.7/270685, intron 26 of 27)	71147	Gm30570	.	.	.	.	.	.	.	.
chr10	4151298	4151449	152	4.85	5.71	2.45	3.26	1.42e-11	6.85e-10	Up	Intron (ENSMUST00000117291.7/270685, intron 27 of 27)	61665	Gm30570	chr10	4151277	4151364	88	B3A	SINE	B2	66
chr10	4151298	4151449	152	4.85	5.71	2.45	3.26	1.42e-11	6.85e-10	Up	Intron (ENSMUST00000117291.7/270685, intron 27 of 27)	61665	Gm30570	chr10	4151366	4151391	26	(GGATG)n	Simple_repeat	Simple_repeat	25
chr10	65215281	65215504	224	4.59	5.09	3.83	1.26	0.00546	0.0345	Up	Distal Intergenic	-94914	Gm28881	chr10	65215351	65215520	170	MTEb	LTR	ERVL-MaLR	153
chr16	76643413	76643574	162	7.33	8.03	5.91	2.12	5.67e-13	3.17e-11	Up	Distal Intergenic	94618	Gm30726	chr16	76643306	76643722	417	MMERGLN_LTR	LTR	ERV1	161
chr16	76642720	76643005	286	8.01	8.74	6.44	2.3	1.82e-15	1.28e-13	Up	Distal Intergenic	93925	Gm30726	chr16	76642633	76643058	426	MMERGLN_LTR	LTR	ERV1	285
chr10	65846241	65846422	182	4.3	4.88	3.3	1.57	0.00234	0.0179	Up	Distal Intergenic	61817	Gm30853	.	.	.	.	.	.	.	.
chr10	65725217	65725468	252	9	9.82	6.94	2.88	3.74e-33	1.09e-30	Up	Distal Intergenic	182771	Gm30853	chr10	65725159	65725582	424	RLTR10C	LTR	ERVK	251
chr10	66004625	66005093	469	7.21	7.59	6.68	0.92	0.000954	0.00865	Up	Distal Intergenic	-96375	Gm30853	chr10	66004740	66005206	467	MT2A	LTR	ERVL	353
chr9	101611571	101611747	177	5.99	6.45	5.32	1.13	0.000125	0.00157	Up	Distal Intergenic	269377	Gm28979	chr9	101611540	101611620	81	RLTR31D_MM	LTR	ERVK	49
chr9	101611571	101611747	177	5.99	6.45	5.32	1.13	0.000125	0.00157	Up	Distal Intergenic	269377	Gm28979	chr9	101611609	101611764	156	B3	SINE	B2	138
chr9	101469861	101470064	204	5.68	6.2	4.84	1.36	0.000251	0.00285	Up	Distal Intergenic	127667	Gm28979	chr9	101469892	101470131	240	RMER15	LTR	ERVL	172
chr4	89351521	89351821	301	6.02	6.55	5.18	1.37	1.05e-05	0.00018	Up	Distal Intergenic	-30136	Gm12610	chr4	89351746	89351818	73	Lx8b	LINE	L1	72
chr4	89352012	89352189	178	5.95	6.34	5.44	0.9	0.0065	0.0395	Up	Distal Intergenic	-29768	Gm12610	chr4	89351953	89352149	197	B2_Mm2	SINE	B2	137
chr4	89352012	89352189	178	5.95	6.34	5.44	0.9	0.0065	0.0395	Up	Distal Intergenic	-29768	Gm12610	chr4	89352153	89352341	189	L1_Mus1	LINE	L1	36
chr4	89515137	89515248	112	4.75	5.27	3.92	1.34	0.00296	0.0214	Up	Distal Intergenic	93289	Gm12610	.	.	.	.	.	.	.	.
chr8	25555829	25556244	416	7.35	7.78	6.73	1.05	0.000107	0.00137	Up	Promoter (<=1kb)	0	Gm16159	.	.	.	.	.	.	.	.
chr4	64588178	64588316	139	7.55	8.22	6.28	1.94	5.59e-12	2.82e-10	Up	Distal Intergenic	-311575	Gm11217	chr4	64588058	64588469	412	RLTR10C	LTR	ERVK	138
chr10	91528424	91528557	134	4.76	5.59	2.59	3	3.34e-08	9.91e-07	Up	Distal Intergenic	-307782	4930534H03Rik	chr10	91528382	91528585	204	B3	SINE	B2	133
chr13	40650960	40651437	478	7.8	8.11	7.42	0.69	0.00791	0.0458	Up	Distal Intergenic	-76371	Gm26688	.	.	.	.	.	.	.	.
chr10	91883303	91883447	145	4.45	5.34	1.69	3.65	1.36e-09	5.04e-08	Up	Distal Intergenic	-5382	Gm31592	chr10	91883262	91883471	210	B3	SINE	B2	144
chr10	116698699	116698832	134	5.47	6.14	4.18	1.96	3.03e-06	5.96e-05	Up	Distal Intergenic	24108	Gm26579	chr10	116698649	116698840	192	B2_Mm2	SINE	B2	133
chr10	116674467	116674666	200	5.27	5.93	4.06	1.87	1.34e-05	0.000224	Up	Promoter (<=1kb)	0	Gm26579	chr10	116674396	116674758	363	ORR1B2	LTR	ERVL-MaLR	199
chr4	67867680	67867963	284	8.57	9.37	6.62	2.75	1.84e-27	3.31e-25	Up	Distal Intergenic	453998	Gm12911	chr4	67867624	67868045	422	RLTR10C	LTR	ERVK	283
chr6	74998437	74998689	253	7.46	8.17	5.97	2.2	3.91e-17	3.18e-15	Up	Distal Intergenic	-1389764	Gm31747	chr6	74998356	74998788	433	RLTR10C	LTR	ERVK	252
chr6	74251409	74251542	134	3.85	4.51	2.61	1.9	0.00646	0.0393	Up	Distal Intergenic	-642736	Gm31747	chr6	74251416	74251948	533	Charlie29a	DNA	hAT-Charlie	126
chr6	73899880	73900056	177	7.52	8.3	5.68	2.63	9.92e-21	1.08e-18	Up	Distal Intergenic	-291207	Gm31747	chr6	73899680	73900109	430	RLTR10C	LTR	ERVK	176
chr6	73644718	73645776	1059	8.43	9.05	7.34	1.72	2.16e-11	1.02e-09	Up	Distal Intergenic	-36045	Gm31747	.	.	.	.	.	.	.	.
chr10	67001194	67001581	388	9.85	10.74	7.01	3.73	8.21e-54	9.92e-51	Up	Distal Intergenic	-3439	Gm31763	chr10	67001120	67001540	421	RLTR10C	LTR	ERVK	346
chr4	29271979	29272204	226	5.52	6.15	4.35	1.8	5.39e-06	9.97e-05	Up	Distal Intergenic	203900	Gm11917	chr4	29271974	29272105	132	RLTR35B_MM	LTR	ERVL	126
chr4	29271979	29272204	226	5.52	6.15	4.35	1.8	5.39e-06	9.97e-05	Up	Distal Intergenic	203900	Gm11917	chr4	29272105	29272237	133	(CAG)n	Simple_repeat	Simple_repeat	99
chr4	30228843	30228924	82	6.18	7.04	3.72	3.32	6.05e-17	4.85e-15	Up	Distal Intergenic	1160764	Gm11917	chr4	30228574	30229035	462	IAPLTR2_Mm	LTR	ERVK	81
chr4	29948313	29948472	160	5.02	5.68	3.78	1.89	5.68e-06	0.000104	Up	Distal Intergenic	880234	Gm11917	chr4	29947898	29948570	673	RMER3D-int	LTR	ERVK	159
chr2	50588693	50589001	309	6.62	6.99	6.13	0.86	0.00483	0.0314	Up	Distal Intergenic	208293	Gm48908	.	.	.	.	.	.	.	.
chr15	95855169	95855291	123	4.99	5.51	4.15	1.36	0.00126	0.0108	Up	Intron (ENSMUST00000071874.7/105722, intron 1 of 19)	-25097	LOC102634389	chr15	95855135	95855324	190	B3	SINE	B2	122
chr15	95856822	95857130	309	6.15	6.72	5.16	1.56	9.98e-07	2.21e-05	Up	Intron (ENSMUST00000071874.7/105722, intron 1 of 19)	-26750	LOC102634389	chr15	95856625	95857810	1186	MTD-int	LTR	ERVL-MaLR	308
chr15	95820095	95820583	489	7.44	8.26	5.34	2.92	5.91e-27	1.03e-24	Up	Intron (ENSMUST00000071874.7/105722, intron 1 of 19)	9489	LOC102634389	chr15	95819950	95820100	151	B1_Mus2	SINE	Alu	5
chr15	95820095	95820583	489	7.44	8.26	5.34	2.92	5.91e-27	1.03e-24	Up	Intron (ENSMUST00000071874.7/105722, intron 1 of 19)	9489	LOC102634389	chr15	95820100	95820435	336	RMER17B	LTR	ERVK	335
chr9	8730951	8731680	730	7.8	8.2	7.24	0.96	3.26e-05	0.00049	Up	Intron (ENSMUST00000215328.1/102634431, intron 1 of 4)	9262	Gm32014	chr9	8730883	8731159	277	B4A	SINE	B4	208
chr9	8730951	8731680	730	7.8	8.2	7.24	0.96	3.26e-05	0.00049	Up	Intron (ENSMUST00000215328.1/102634431, intron 1 of 4)	9262	Gm32014	chr9	8731172	8731340	169	MIRb	SINE	MIR	168
chr9	8730951	8731680	730	7.8	8.2	7.24	0.96	3.26e-05	0.00049	Up	Intron (ENSMUST00000215328.1/102634431, intron 1 of 4)	9262	Gm32014	chr9	8731543	8731573	31	(CCCCCT)n	Simple_repeat	Simple_repeat	30
chr9	8730951	8731680	730	7.8	8.2	7.24	0.96	3.26e-05	0.00049	Up	Intron (ENSMUST00000215328.1/102634431, intron 1 of 4)	9262	Gm32014	chr9	8731648	8731839	192	B4A	SINE	B4	32
chr1	31110331	31110510	180	8.35	9.14	6.47	2.67	2.31e-22	2.82e-20	Up	Intron (ENSMUST00000233331.1/70988, intron 2 of 4)	-13877	Gm29669	chr1	31110181	31110608	428	RLTR10C	LTR	ERVK	179
chr1	31058941	31059423	483	7.12	7.52	6.56	0.95	0.00768	0.0448	Up	Intron (ENSMUST00000233331.1/70988, intron 2 of 4)	37031	Gm29669	chr1	31059168	31059316	149	LTR75B	LTR	ERVL	148
chr7	16584518	16584650	133	5	5.45	4.36	1.09	0.00885	0.0498	Up	Intron (ENSMUST00000075845.10/232906, intron 1 of 6)	-29174	Gm29443	.	.	.	.	.	.	.	.
chr7	16583928	16584217	290	5.46	5.87	4.89	0.98	0.00874	0.0494	Up	Intron (ENSMUST00000075845.10/232906, intron 1 of 6)	-29607	Gm29443	chr7	16584151	16584260	110	PB1D10	SINE	Alu	66
chr14	24983437	24983591	155	5.07	5.64	4.11	1.53	0.000203	0.00237	Up	Distal Intergenic	-125793	Gm32123	chr14	24983399	24983622	224	B3	SINE	B2	154
chr10	117490374	117490677	304	9.71	10.61	6.83	3.78	9.97e-56	1.44e-52	Up	Distal Intergenic	-42881	Gm32141	chr10	117490288	117490720	433	RLTR10C	LTR	ERVK	303
chr10	117455623	117455802	180	6.02	6.45	5.39	1.06	0.000839	0.00778	Up	Distal Intergenic	-8130	Gm32141	chr10	117455591	117455794	204	B3	SINE	B2	171
chr10	117483688	117484448	761	10.11	11.02	7.2	3.81	1.25e-70	1.03e-66	Up	Distal Intergenic	-36195	Gm32141	chr10	117483664	117484096	433	RLTR10C	LTR	ERVK	408
chr10	117483688	117484448	761	10.11	11.02	7.2	3.81	1.25e-70	1.03e-66	Up	Distal Intergenic	-36195	Gm32141	chr10	117484099	117484442	344	MMERVK10C-int	LTR	ERVK	343
chr10	117483688	117484448	761	10.11	11.02	7.2	3.81	1.25e-70	1.03e-66	Up	Distal Intergenic	-36195	Gm32141	chr10	117484440	117484680	241	MMERVK10C-int	LTR	ERVK	8
chr17	90797689	90798027	339	6.39	6.8	5.8	1.01	0.000651	0.00632	Up	Intron (ENSMUST00000072671.13/18189, intron 4 of 20)	-3683	Gm20491	chr17	90797927	90798111	185	Lx7	LINE	L1	100
chr1	52582092	52582179	88	5.43	5.85	4.85	1	0.00274	0.0202	Up	Promoter (1-2kb)	-1801	Gm28178	chr1	52582058	52582240	183	B2_Mm1a	SINE	B2	87
chr1	191496776	191497081	306	6.96	7.35	6.43	0.92	0.00264	0.0196	Up	Distal Intergenic	-31728	Gm32200	chr1	191496949	191496980	32	(TTTG)n	Simple_repeat	Simple_repeat	31
chr1	191496776	191497081	306	6.96	7.35	6.43	0.92	0.00264	0.0196	Up	Distal Intergenic	-31728	Gm32200	chr1	191496982	191497094	113	B1_Mus2	SINE	Alu	99
chr1	191469630	191469754	125	5.81	6.26	5.16	1.11	0.000313	0.00343	Up	Distal Intergenic	-4582	Gm32200	chr1	191469635	191469824	190	B3	SINE	B2	119
chr1	191513299	191513517	219	4.82	5.42	3.76	1.66	0.000332	0.00361	Up	Distal Intergenic	-48251	Gm32200	chr1	191513288	191513333	46	(CA)n	Simple_repeat	Simple_repeat	34
chr1	191513299	191513517	219	4.82	5.42	3.76	1.66	0.000332	0.00361	Up	Distal Intergenic	-48251	Gm32200	chr1	191513333	191513372	40	B3A	SINE	B2	39
chr1	191513299	191513517	219	4.82	5.42	3.76	1.66	0.000332	0.00361	Up	Distal Intergenic	-48251	Gm32200	chr1	191513375	191513588	214	B4A	SINE	B4	142
chr2	74762843	74763512	670	7.11	7.49	6.58	0.91	0.000683	0.00658	Up	Promoter (<=1kb)	0	Haglr	.	.	.	.	.	.	.	.
chr16	86454106	86454346	241	6.04	6.39	5.57	0.82	0.00646	0.0393	Up	Distal Intergenic	352018	Gm32461	.	.	.	.	.	.	.	.
chr2	15538623	15538945	323	5.65	6.19	4.77	1.42	2.15e-05	0.00034	Up	Intron (ENSMUST00000146205.2/102635496, intron 1 of 38)	12144	Malrd1	.	.	.	.	.	.	.	.
chr15	97206622	97206829	208	4.96	5.81	2.63	3.18	0.000194	0.00229	Up	Distal Intergenic	-39378	Gm32885	chr15	97206500	97206747	248	RLTR12BD_Mm	LTR	ERVK	125
chr15	97206622	97206829	208	4.96	5.81	2.63	3.18	0.000194	0.00229	Up	Distal Intergenic	-39378	Gm32885	chr15	97206792	97206912	121	RLTR12D	LTR	ERVK	37
chr5	106371322	106371781	460	9.1	9.93	6.91	3.02	6.89e-40	3.62e-37	Up	Distal Intergenic	49982	Gm32921	chr5	106371018	106371380	363	MTB	LTR	ERVL-MaLR	58
chr5	106371322	106371781	460	9.1	9.93	6.91	3.02	6.89e-40	3.62e-37	Up	Distal Intergenic	49982	Gm32921	chr5	106371380	106371801	422	RLTR10C	LTR	ERVK	401
chr18	50065450	50065751	302	6.56	7.19	5.42	1.76	3.15e-10	1.28e-08	Up	Intron (ENSMUST00000148989.2/106869, intron 1 of 1)	-11606	C030005K06Rik	chr18	50065490	50065742	253	MTD	LTR	ERVL-MaLR	252
chr13	110930582	110930848	267	6.03	6.5	5.33	1.16	9.58e-05	0.00125	Up	Distal Intergenic	-26736	4930526H09Rik	chr13	110930755	110930899	145	B1_Mur4	SINE	Alu	93
chr15	40223429	40223583	155	4.47	5.27	2.55	2.72	1.99e-06	4.09e-05	Up	Distal Intergenic	60822	Gm33301	chr15	40223390	40223585	196	B3A	SINE	B2	154
chr10	118778334	118778494	161	6.86	7.5	5.71	1.78	1.26e-09	4.71e-08	Up	Distal Intergenic	-62608	Gm33337	chr10	118778273	118778585	313	RLTR10B	LTR	ERVK	160
chr10	118746859	118747766	908	9.1	9.39	8.72	0.67	0.0049	0.0318	Up	Distal Intergenic	-31133	Gm33337	.	.	.	.	.	.	.	.
chr12	42820987	42821340	354	6.48	6.85	5.99	0.86	0.0023	0.0176	Up	Distal Intergenic	194119	Gm33340	chr12	42820987	42821356	370	RLTR19-int	LTR	ERVK	353
chr13	111951939	111952265	327	9.07	9.89	7.01	2.87	2.96e-24	4.21e-22	Up	Distal Intergenic	84003	Gm15326	chr13	111951912	111952337	426	RLTR10C	LTR	ERVK	326
chr4	140143317	140143483	167	4.99	5.72	3.43	2.29	1.35e-07	3.6e-06	Up	Promoter (<=1kb)	444	Gm13029	chr4	140143307	140143483	177	B3A	SINE	B2	166
chr4	140177175	140177361	187	6.95	7.57	5.81	1.76	1.38e-07	3.67e-06	Up	Intron (ENSMUST00000039331.8/230868, intron 1 of 9)	34302	Gm13029	chr4	140176906	140177236	331	ORR1D1	LTR	ERVL-MaLR	61
chr4	140177175	140177361	187	6.95	7.57	5.81	1.76	1.38e-07	3.67e-06	Up	Intron (ENSMUST00000039331.8/230868, intron 1 of 9)	34302	Gm13029	chr4	140177240	140177285	46	ORR1D1	LTR	ERVL-MaLR	45
chr4	140177175	140177361	187	6.95	7.57	5.81	1.76	1.38e-07	3.67e-06	Up	Intron (ENSMUST00000039331.8/230868, intron 1 of 9)	34302	Gm13029	chr4	140177294	140177423	130	ORR1D1	LTR	ERVL-MaLR	67
chr4	140068450	140068736	287	5.48	6.24	3.8	2.44	7.92e-09	2.61e-07	Up	Intron (ENSMUST00000039331.8/230868, intron 3 of 9)	-74137	Gm13029	chr4	140068362	140068552	191	B3A	SINE	B2	102
chr4	140068450	140068736	287	5.48	6.24	3.8	2.44	7.92e-09	2.61e-07	Up	Intron (ENSMUST00000039331.8/230868, intron 3 of 9)	-74137	Gm13029	chr4	140068604	140068755	152	B3	SINE	B2	132
chr4	140179703	140180055	353	6.46	6.9	5.83	1.07	0.00029	0.00321	Up	Intron (ENSMUST00000039331.8/230868, intron 1 of 9)	36830	Gm13029	chr4	140179722	140180003	282	ORR1F	LTR	ERVL-MaLR	281
chr10	119066106	119066240	135	6.47	6.96	5.75	1.21	0.000112	0.00143	Up	Distal Intergenic	-15607	Gm33677	.	.	.	.	.	.	.	.
chr1	79197849	79197964	116	4.43	4.94	3.64	1.3	0.00605	0.0374	Up	Intron (ENSMUST00000189296.1/102636764, intron 1 of 3)	26547	Gm29536	chr1	79197414	79198158	745	RMER19C	LTR	ERVK	115
chr4	37273798	37274182	385	7.97	8.75	6.14	2.61	4.11e-26	6.69e-24	Up	Intron (ENSMUST00000147108.1/102636890, intron 1 of 7)	24395	Gm12374	chr4	37273709	37274208	500	RLTR10C	LTR	ERVK	384
chr4	38919431	38919740	310	8.63	9.43	6.65	2.78	5.98e-27	1.04e-24	Up	Distal Intergenic	-63948	Gm12381	chr4	38919339	38919768	430	RLTR10C	LTR	ERVK	309
chr18	29097618	29097837	220	7.7	8.51	5.72	2.79	1.47e-26	2.47e-24	Up	Distal Intergenic	225393	Gm33948	chr18	29097454	29097877	424	RLTR10C	LTR	ERVK	219
chr2	19445983	19446422	440	6.68	7.02	6.23	0.79	0.00821	0.0471	Up	Promoter (<=1kb)	252	Ptf1aos	.	.	.	.	.	.	.	.
chr2	19455178	19455426	249	5.4	5.82	4.8	1.02	0.00585	0.0364	Up	Distal Intergenic	-8504	Ptf1aos	.	.	.	.	.	.	.	.
chr5	37879580	37880303	724	8.97	9.64	7.65	2	3.23e-14	2.04e-12	Up	Distal Intergenic	-13469	Gm20052	.	.	.	.	.	.	.	.
chr5	37875048	37875281	234	5.83	6.61	4.02	2.59	4.14e-13	2.36e-11	Up	Distal Intergenic	-18491	Gm20052	chr5	37875126	37875334	209	L2b	LINE	L2	155
chr1	183666810	183666892	83	3.75	4.55	1.76	2.79	3.08e-05	0.000465	Up	Distal Intergenic	-82085	Gm34068	chr1	183666800	183666824	25	(TG)n	Simple_repeat	Simple_repeat	14
chr1	183666810	183666892	83	3.75	4.55	1.76	2.79	3.08e-05	0.000465	Up	Distal Intergenic	-82085	Gm34068	chr1	183666824	183666972	149	B3	SINE	B2	68
chr1	183637325	183637524	200	4.31	4.97	3.08	1.89	0.000638	0.00622	Up	Distal Intergenic	-111453	Gm34068	chr1	183637186	183637363	178	MTE2a	LTR	ERVL-MaLR	38
chr1	183637325	183637524	200	4.31	4.97	3.08	1.89	0.000638	0.00622	Up	Distal Intergenic	-111453	Gm34068	chr1	183637439	183637684	246	MTE2a	LTR	ERVL-MaLR	85
chr1	183788792	183789276	485	8.04	8.59	7.14	1.45	1.66e-08	5.18e-07	Up	Intron (ENSMUST00000193310.1/102637191, intron 2 of 2)	39815	Gm34068	chr1	183788859	183789009	151	MER63A	DNA	hAT-Blackjack	150
chr10	84036208	84036537	330	6.83	7.18	6.36	0.82	0.00526	0.0336	Up	Downstream (<1kb)	64160	Gm34184	.	.	.	.	.	.	.	.
chr10	84240351	84240558	208	8.14	8.97	6.01	2.96	2.71e-29	5.81e-27	Up	Distal Intergenic	-139654	Gm34184	chr10	84240223	84240640	418	RLTR10C	LTR	ERVK	207
chr3	63492094	63492259	166	6.96	7.71	5.31	2.4	7.51e-16	5.45e-14	Up	Distal Intergenic	52843	Gm34240	chr3	63491962	63492393	432	RLTR10C	LTR	ERVK	165
chr18	5145456	5145542	87	4.72	5.67	0.66	5.02	3.2e-11	1.48e-09	Up	Distal Intergenic	20189	Gm26682	chr18	5145391	5145584	194	B3	SINE	B2	86
chr12	52408483	52408650	168	4.96	5.67	3.47	2.21	2.8e-06	5.55e-05	Up	Intron (ENSMUST00000218097.1/ENSMUST00000218097.1, intron 1 of 1)	71959	Gm35135	chr12	52408438	52408636	199	B3	SINE	B2	153
chr1	122050205	122050390	186	8.07	8.83	6.32	2.51	2.43e-22	2.96e-20	Up	Distal Intergenic	-154755	Gm28590	chr1	122050042	122050472	431	RLTR10C	LTR	ERVK	185
chr15	19872739	19872877	139	4.38	4.95	3.41	1.54	0.00172	0.0139	Up	Distal Intergenic	687366	Gm35496	.	.	.	.	.	.	.	.
chr15	19126137	19126478	342	6.51	7.12	5.43	1.69	7.04e-07	1.61e-05	Up	Distal Intergenic	-58895	Gm35496	chr15	19126023	19126749	727	RMER6C	LTR	ERVK	341
chr3	68739301	68739391	91	6.16	6.95	4.29	2.66	3.57e-14	2.25e-12	Up	Distal Intergenic	-22104	Gm35584	chr3	68739299	68739651	353	IAPLTR1_Mm	LTR	ERVK	90
chr1	150168199	150168499	301	9.64	10.46	7.55	2.91	1.24e-29	2.74e-27	Up	Distal Intergenic	-3251	Ptgs2os2	chr1	150168174	150168600	427	RLTR10C	LTR	ERVK	300
chr6	147253325	147253686	362	7.04	7.44	6.48	0.96	0.000646	0.00629	Up	Intron (ENSMUST00000052296.8/19227, intron 3 of 3)	-9524	Gm15767	.	.	.	.	.	.	.	.
chr3	37170982	37171345	364	7.41	8.04	6.28	1.76	8.27e-09	2.72e-07	Up	Distal Intergenic	-11540	Gm12532	chr3	37170940	37171097	158	(CAGTA)n	Simple_repeat	Simple_repeat	115
chr3	37170982	37171345	364	7.41	8.04	6.28	1.76	8.27e-09	2.72e-07	Up	Distal Intergenic	-11540	Gm12532	chr3	37171131	37171448	318	(CAGTA)n	Simple_repeat	Simple_repeat	214
chr17	13025992	13026502	511	7.76	8.06	7.39	0.67	0.00475	0.031	Up	Intron (ENSMUST00000232726.1/102639918, intron 4 of 6)	-8474	Gm36117	chr17	13026155	13026513	359	RLTR14	LTR	ERV1	347
chr17	13025992	13026502	511	7.76	8.06	7.39	0.67	0.00475	0.031	Up	Intron (ENSMUST00000232726.1/102639918, intron 4 of 6)	-8474	Gm36117	chr17	13024973	13026013	1041	L1M2	LINE	L1	21
chr6	16671383	16671681	299	5.79	6.32	4.97	1.35	0.000122	0.00154	Up	Distal Intergenic	-105843	Gm36669	chr6	16671056	16671707	652	RMER6C	LTR	ERVK	298
chr17	17230908	17231231	324	7.87	8.77	5.01	3.76	1.05e-37	4.75e-35	Up	Distal Intergenic	-3641	LOC102640673	chr17	17230820	17231245	426	RLTR10B2	LTR	ERVK	323
chr1	151735514	151735697	184	8.07	8.85	6.19	2.66	4.93e-19	4.68e-17	Up	Distal Intergenic	19321	2810414N06Rik	chr1	151735404	151735824	421	RLTR10C	LTR	ERVK	183
chr8	112474379	112474573	195	4.85	5.29	4.21	1.08	0.0069	0.0413	Up	Distal Intergenic	95002	Gm26994	chr8	112474270	112474577	308	RMER1B	Other	Other	194
chr8	112482176	112482277	102	3.8	4.68	1.17	3.52	2.3e-06	4.67e-05	Up	Distal Intergenic	87298	Gm26994	chr8	112482134	112482335	202	B3A	SINE	B2	101
chr10	25714102	25714543	442	6.3	6.86	5.37	1.49	6.76e-07	1.55e-05	Up	Distal Intergenic	-92539	Gm36908	.	.	.	.	.	.	.	.
chr10	25695878	25696078	201	4.78	5.4	3.64	1.77	0.000103	0.00133	Up	Distal Intergenic	-74315	Gm36908	.	.	.	.	.	.	.	.
chr10	25647854	25648054	201	5.16	5.83	3.89	1.93	1.8e-06	3.75e-05	Up	Intron (ENSMUST00000191547.1/102640597, intron 3 of 3)	-26291	Gm36908	chr10	25647835	25648026	192	B3	SINE	B2	172
chr9	69377104	69377243	140	4.62	5.39	2.86	2.53	6.47e-07	1.48e-05	Up	Intron (ENSMUST00000034766.13/19883, intron 10 of 10)	-12857	Gm15511	chr9	69377137	69377301	165	B3A	SINE	B2	106
chr9	113584075	113584475	401	6.72	7.33	5.65	1.68	9.02e-09	2.95e-07	Up	Intron (ENSMUST00000209897.1/102688, intron 1 of 4)	2677	AU023762	chr9	113583902	113584792	891	RMER19B	LTR	ERVK	400
chr9	113559456	113559640	185	4.78	5.44	3.53	1.9	4.1e-05	0.000597	Up	Intron (ENSMUST00000209897.1/102688, intron 1 of 4)	27512	AU023762	chr9	113559354	113559476	123	RMER1A	Other	Other	20
chr9	113559456	113559640	185	4.78	5.44	3.53	1.9	4.1e-05	0.000597	Up	Intron (ENSMUST00000209897.1/102688, intron 1 of 4)	27512	AU023762	chr9	113559476	113559508	33	(CA)n	Simple_repeat	Simple_repeat	32
chr9	113559456	113559640	185	4.78	5.44	3.53	1.9	4.1e-05	0.000597	Up	Intron (ENSMUST00000209897.1/102688, intron 1 of 4)	27512	AU023762	chr9	113559508	113559608	101	RMER1A	Other	Other	100
chr9	112922694	112923001	308	8.89	9.72	6.68	3.04	1.84e-41	1.1e-38	Up	Distal Intergenic	585354	AU023762	chr9	112922671	112923083	413	RLTR10C	LTR	ERVK	307
chr9	113421746	113421884	139	5.2	5.87	3.9	1.97	1.59e-07	4.17e-06	Up	Exon (ENSMUST00000216389.1/ENSMUST00000216389.1, exon 2 of 2)	86471	AU023762	chr9	113421733	113421924	192	B3A	SINE	B2	138
chr9	113156859	113156971	113	5.01	5.59	4	1.6	0.000211	0.00246	Up	Distal Intergenic	351384	AU023762	chr9	113156806	113156988	183	B3A	SINE	B2	112
chr9	113229497	113229765	269	6.16	6.82	4.91	1.91	7.08e-08	1.98e-06	Up	Distal Intergenic	278590	AU023762	chr9	113229702	113229818	117	(TG)n	Simple_repeat	Simple_repeat	63
chr9	113396719	113396995	277	5.09	5.97	2.44	3.53	2.04e-12	1.08e-10	Up	Distal Intergenic	111360	AU023762	chr9	113396397	113396949	553	Lx8	LINE	L1	230
chr9	44740863	44741050	188	4.86	5.47	3.8	1.67	8.34e-05	0.00111	Up	Downstream (<1kb)	-5665	Phldb1	chr9	44740849	44740952	104	PB1D9	SINE	Alu	89
chr9	44740863	44741050	188	4.86	5.47	3.8	1.67	8.34e-05	0.00111	Up	Downstream (<1kb)	-5665	Phldb1	chr9	44740947	44741117	171	B3	SINE	B2	103
chr9	60653255	60653438	184	5.86	6.3	5.23	1.07	0.000515	0.00521	Up	Intron (ENSMUST00000150060.7/102747, intron 7 of 16)	-3454	Lrrc49	.	.	.	.	.	.	.	.
chr9	60681115	60681230	116	4.8	5.51	3.34	2.17	5.56e-06	0.000102	Up	Intron (ENSMUST00000150060.7/102747, intron 3 of 16)	6304	Lrrc49	chr9	60681065	60681272	208	B3	SINE	B2	115
chr9	60694092	60694299	208	6.38	7.01	5.23	1.78	9.85e-10	3.73e-08	Up	Distal Intergenic	-5934	Lrrc49	chr9	60693891	60694108	218	B4	SINE	B4	16
chr9	60694092	60694299	208	6.38	7.01	5.23	1.78	9.85e-10	3.73e-08	Up	Distal Intergenic	-5934	Lrrc49	chr9	60694118	60694328	211	B3	SINE	B2	181
chr9	60591386	60591519	134	5.09	5.75	3.83	1.92	5.9e-05	0.000822	Up	Intron (ENSMUST00000150060.7/102747, intron 15 of 16)	7070	Lrrc49	chr9	60591364	60591538	175	B3A	SINE	B2	133
chr9	59374061	59374189	129	5.05	5.56	4.25	1.31	0.000529	0.00533	Up	Distal Intergenic	-20553	Bbs4	chr9	59370532	59375669	5138	MMERVK10D3_I-int	LTR	ERVK	128
chr15	85647770	85647889	120	4.53	5.17	3.37	1.8	0.00111	0.00978	Up	Intron (ENSMUST00000230234.1/ENSMUST00000230234.1, intron 1 of 1)	-5727	Lncppara	chr15	85647792	85647932	141	B1_Mur2	SINE	Alu	97
chr10	103662342	103662670	329	9.03	9.86	6.84	3.02	1.15e-39	5.96e-37	Up	Distal Intergenic	268892	Slc6a15	chr10	103662303	103662726	424	RLTR10C	LTR	ERVK	328
chr10	103357327	103357599	273	5.47	5.95	4.74	1.21	0.000232	0.00266	Up	Distal Intergenic	-10209	Slc6a15	chr10	103357458	103357722	265	MLT1A0	LTR	ERVL-MaLR	141
chr10	75457916	75458122	207	6.12	6.55	5.51	1.04	0.000375	0.004	Up	Intron (ENSMUST00000145890.7/68778, intron 5 of 8)	29735	Upb1	chr10	75457867	75457931	65	(GA)n	Simple_repeat	Simple_repeat	15
chr10	75378758	75379090	333	6.25	6.73	5.55	1.18	0.000257	0.0029	Up	Intron (ENSMUST00000145890.7/68778, intron 6 of 8)	-22025	Upb1	.	.	.	.	.	.	.	.
chr10	41253162	41253390	229	8.07	8.9	5.89	3.01	2.95e-31	7.4e-29	Up	Intron (ENSMUST00000043814.4/103199, intron 14 of 22)	49870	Fig4	chr10	41253045	41253463	419	RLTR10C	LTR	ERVK	228
chr10	39600891	39601339	449	7.65	8.1	7	1.1	7.01e-06	0.000126	Up	Intron (ENSMUST00000142723.7/100504626, intron 2 of 2)	-11595	Traf3ip2	chr10	39600894	39601055	162	Tigger7	DNA	TcMar-Tigger	161
chr10	39600891	39601339	449	7.65	8.1	7	1.1	7.01e-06	0.000126	Up	Intron (ENSMUST00000142723.7/100504626, intron 2 of 2)	-11595	Traf3ip2	chr10	39601078	39601423	346	ORR1E	LTR	ERVL-MaLR	261
chr10	39653903	39654364	462	6.73	7.16	6.11	1.05	0.000299	0.0033	Up	Exon (ENSMUST00000136862.7/327744, exon 6 of 6)	3348	Traf3ip2	.	.	.	.	.	.	.	.
chr10	39600690	39600791	102	4.67	5.28	3.61	1.67	0.00011	0.0014	Up	Intron (ENSMUST00000142723.7/100504626, intron 2 of 2)	-12143	Traf3ip2	chr10	39600576	39600694	119	MER44D	DNA	TcMar-Tigger	4
chr10	39600690	39600791	102	4.67	5.28	3.61	1.67	0.00011	0.0014	Up	Intron (ENSMUST00000142723.7/100504626, intron 2 of 2)	-12143	Traf3ip2	chr10	39600697	39600854	158	RSINE1	SINE	B4	94
chr10	39606288	39606740	453	5.76	6.26	5	1.26	0.000183	0.00217	Up	Intron (ENSMUST00000142723.7/100504626, intron 1 of 2)	-6194	Traf3ip2	chr10	39605979	39607170	1192	ORR1A4-int	LTR	ERVL-MaLR	452
chr10	128537698	128538095	398	9.15	9.95	7.23	2.72	1.1e-29	2.45e-27	Up	Intron (ENSMUST00000188089.1/ENSMUST00000188089.1, intron 1 of 2)	9544	Zc3h10	chr10	128537644	128538062	419	RLTR10C	LTR	ERVK	364
chr10	86829620	86829773	154	5.32	6.08	3.59	2.49	2.48e-10	1.02e-08	Up	Intron (ENSMUST00000218802.1/103466, intron 12 of 13)	4517	Nt5dc3	chr10	86829597	86829795	199	B3	SINE	B2	153
chr10	117801330	117801848	519	8.84	9.64	6.95	2.69	2.33e-32	6.33e-30	Up	Distal Intergenic	-8625	Nup107	chr10	117801273	117801459	187	B2_Mm1a	SINE	B2	129
chr10	117801330	117801848	519	8.84	9.64	6.95	2.69	2.33e-32	6.33e-30	Up	Distal Intergenic	-8625	Nup107	chr10	117801459	117801958	500	RLTR10C	LTR	ERVK	389
chr10	117796317	117796447	131	6.12	6.82	4.67	2.15	8.43e-12	4.15e-10	Up	Distal Intergenic	-3612	Nup107	chr10	117796287	117796489	203	B3	SINE	B2	130
chr11	97642853	97642998	146	4.52	5.29	2.75	2.53	1.4e-06	2.99e-05	Up	Distal Intergenic	-13151	Epop	chr11	97642858	97643065	208	B3	SINE	B2	140
chr11	97644939	97645195	257	6.49	6.99	5.71	1.28	2.35e-05	0.000367	Up	Exon (ENSMUST00000134427.1/ENSMUST00000134427.1, exon 3 of 4)	-15237	Epop	chr11	97644918	97645118	201	B3A	SINE	B2	179
chr11	23261593	23261746	154	6.55	7.21	5.32	1.88	1.13e-08	3.62e-07	Up	Intron (ENSMUST00000020538.12/103573, intron 2 of 25)	5004	Xpo1	chr11	23261587	23261749	163	B2_Mm1a	SINE	B2	153
chr11	32633668	32633791	124	5.06	5.88	2.92	2.96	3.49e-11	1.6e-09	Up	Distal Intergenic	-8933	Fbxw11	chr11	32633633	32633810	178	B3	SINE	B2	123
chr11	32667099	32667266	168	5.32	5.91	4.31	1.59	0.000157	0.00191	Up	Intron (ENSMUST00000109366.7/103583, intron 1 of 12)	24195	Fbxw11	chr11	32666987	32667104	118	MLT1K	LTR	ERVL-MaLR	5
chr11	32677763	32678152	390	6.6	7.14	5.72	1.42	9.66e-06	0.000167	Up	Intron (ENSMUST00000109366.7/103583, intron 1 of 12)	34859	Fbxw11	chr11	32677992	32678076	85	BC1_Mm	scRNA	scRNA	84
chr11	74965438	74966181	744	8.17	8.54	7.67	0.87	0.000613	0.00602	Up	Intron (ENSMUST00000045281.12/103677, intron 8 of 18)	-23180	Smg6	.	.	.	.	.	.	.	.
chr11	74990513	74990853	341	6.72	7.09	6.22	0.87	0.00145	0.0122	Up	Promoter (1-2kb)	1152	Smg6	.	.	.	.	.	.	.	.
chr11	3918879	3918985	107	5.82	6.32	5.04	1.29	3.41e-05	0.00051	Up	Intron (ENSMUST00000109992.7/21452, intron 9 of 9)	-4215	Slc35e4	chr11	3918860	3919027	168	B2_Mm2	SINE	B2	106
chr11	3921151	3921795	645	7.32	7.67	6.85	0.82	0.000537	0.0054	Up	Intron (ENSMUST00000109992.7/21452, intron 8 of 9)	-6487	Slc35e4	chr11	3921139	3921269	131	B1_Mur4	SINE	Alu	118
chr11	71039991	71040310	320	7.71	8.5	5.77	2.74	2.93e-19	2.83e-17	Up	Distal Intergenic	-6478	6330403K07Rik	chr11	71040271	71040739	469	IAPLTR2_Mm	LTR	ERVK	39
chr11	71044424	71044850	427	8.48	9.15	7.16	1.99	7.08e-15	4.76e-13	Up	Distal Intergenic	-10911	6330403K07Rik	chr11	71044249	71044717	469	IAPLTR2_Mm	LTR	ERVK	293
chr11	71044424	71044850	427	8.48	9.15	7.16	1.99	7.08e-15	4.76e-13	Up	Distal Intergenic	-10911	6330403K07Rik	chr11	71044846	71044942	97	L3	LINE	CR1	4
chr11	71040429	71040634	206	8	8.56	7.05	1.51	2.19e-09	7.89e-08	Up	Distal Intergenic	-6916	6330403K07Rik	chr11	71040271	71040739	469	IAPLTR2_Mm	LTR	ERVK	205
chr11	71039655	71039815	161	5.51	6.27	3.79	2.48	5.14e-10	2.03e-08	Up	Distal Intergenic	-6142	6330403K07Rik	.	.	.	.	.	.	.	.
chr11	4202202	4202374	173	5.41	6.1	4.05	2.05	6.66e-08	1.87e-06	Up	Intron (ENSMUST00000147485.7/103724, intron 1 of 7)	-3049	Tbc1d10a	.	.	.	.	.	.	.	.
chr11	101127197	101127342	146	5.62	6.33	4.18	2.16	4.29e-09	1.48e-07	Up	Distal Intergenic	2697	Tubg1	chr11	101127173	101127230	58	(TG)n	Simple_repeat	Simple_repeat	33
chr11	101127197	101127342	146	5.62	6.33	4.18	2.16	4.29e-09	1.48e-07	Up	Distal Intergenic	2697	Tubg1	chr11	101127230	101127376	147	B3	SINE	B2	112
chr11	101131846	101132016	171	6.33	7.06	4.81	2.24	1.71e-11	8.18e-10	Up	Distal Intergenic	7346	Tubg1	chr11	101131826	101132009	184	B3	SINE	B2	163
chr17	57039078	57039262	185	4.97	5.73	3.3	2.43	6.8e-09	2.27e-07	Up	Promoter (2-3kb)	2385	Slc25a41	chr17	57039085	57039274	190	B3	SINE	B2	177
chr11	17174210	17174395	186	4.34	4.92	3.34	1.58	0.001	0.00901	Up	Intron (ENSMUST00000102880.4/19058, intron 1 of 5)	-7712	Wdr92	chr11	17174142	17174303	162	L1M2	LINE	L1	93
chr11	17174210	17174395	186	4.34	4.92	3.34	1.58	0.001	0.00901	Up	Intron (ENSMUST00000102880.4/19058, intron 1 of 5)	-7712	Wdr92	chr11	17174295	17175068	774	L1M2	LINE	L1	100
chr11	17234636	17234713	78	6.31	6.71	5.75	0.95	0.00362	0.0251	Up	Distal Intergenic	22718	Wdr92	chr11	17234383	17234923	541	RLTR6_Mm	LTR	ERV1	77
chr11	17172408	17172699	292	5.02	5.48	4.36	1.12	0.00366	0.0253	Up	Intron (ENSMUST00000102880.4/19058, intron 1 of 5)	-9408	Wdr92	.	.	.	.	.	.	.	.
chr11	17176683	17176944	262	6.02	6.67	4.78	1.89	2.05e-09	7.42e-08	Up	Intron (ENSMUST00000102880.4/19058, intron 1 of 5)	-5163	Wdr92	chr11	17176607	17176687	81	B3	SINE	B2	4
chr11	17176683	17176944	262	6.02	6.67	4.78	1.89	2.05e-09	7.42e-08	Up	Intron (ENSMUST00000102880.4/19058, intron 1 of 5)	-5163	Wdr92	chr11	17176683	17176774	92	PB1D9	SINE	Alu	91
chr11	50269273	50269414	142	5.34	5.98	4.15	1.82	5.52e-06	0.000102	Up	Intron (ENSMUST00000180443.2/ENSMUST00000180443.2, intron 1 of 2)	22390	Maml1	chr11	50269269	50269402	134	B3	SINE	B2	129
chr11	50269273	50269414	142	5.34	5.98	4.15	1.82	5.52e-06	0.000102	Up	Intron (ENSMUST00000180443.2/ENSMUST00000180443.2, intron 1 of 2)	22390	Maml1	chr11	50269402	50269583	182	B2_Mm2	SINE	B2	12
chr11	59847242	59847432	191	7.72	8.08	7.24	0.84	0.00106	0.00941	Up	Promoter (<=1kb)	-641	Nt5m	chr11	59847223	59847271	49	(TC)n	Simple_repeat	Simple_repeat	29
chr11	59847242	59847432	191	7.72	8.08	7.24	0.84	0.00106	0.00941	Up	Promoter (<=1kb)	-641	Nt5m	chr11	59847276	59847398	123	B3	SINE	B2	122
chr1	162092509	162092686	178	4.69	5.39	3.29	2.1	5.51e-05	0.000775	Up	Intron (ENSMUST00000159763.7/103967, intron 4 of 8)	42066	Dnm3	chr1	162092498	162092708	211	B3	SINE	B2	177
chr14	115098118	115098252	135	5.11	5.88	3.34	2.54	4.93e-08	1.42e-06	Up	Intron (ENSMUST00000176993.1/103978, intron 1 of 1)	5492	Gpc5	chr14	115097938	115098129	192	RLTR17B_Mm	LTR	ERVK	11
chr14	115098118	115098252	135	5.11	5.88	3.34	2.54	4.93e-08	1.42e-06	Up	Intron (ENSMUST00000176993.1/103978, intron 1 of 1)	5492	Gpc5	chr14	115098146	115098224	79	B3A	SINE	B2	78
chr14	115228127	115228413	287	6.26	6.86	5.21	1.65	2.57e-07	6.43e-06	Up	Intron (ENSMUST00000176912.7/103978, intron 2 of 7)	135501	Gpc5	chr14	115228064	115228246	183	L1M4	LINE	L1	119
chr14	115228127	115228413	287	6.26	6.86	5.21	1.65	2.57e-07	6.43e-06	Up	Intron (ENSMUST00000176912.7/103978, intron 2 of 7)	135501	Gpc5	chr14	115228310	115228462	153	B1_Mur4	SINE	Alu	103
chr11	5931976	5932209	234	6.79	7.34	5.88	1.46	3.68e-08	1.08e-06	Up	Intron (ENSMUST00000102920.3/103988, intron 1 of 9)	-16852	Gck	chr11	5931525	5933649	2125	MuRRS4-int	LTR	ERV1	233
chr12	72304260	72304675	416	7.64	8.02	7.11	0.91	0.00242	0.0184	Up	Exon (ENSMUST00000078505.13/104001, exon 3 of 9)	-67536	Rtn1	chr12	72304428	72304485	58	(CAGA)n	Simple_repeat	Simple_repeat	57
chr12	72417864	72418046	183	5.73	6.14	5.16	0.97	0.00225	0.0173	Up	Distal Intergenic	-8810	Rtn1	chr12	72417849	72418041	193	B3A	SINE	B2	177
chr12	72245104	72245183	80	3.71	4.4	2.36	2.05	0.00283	0.0207	Up	Intron (ENSMUST00000078505.13/104001, intron 3 of 8)	-8380	Rtn1	chr12	72245049	72245226	178	B3A	SINE	B2	79
chr12	72252028	72252317	290	5.35	5.77	4.74	1.03	0.00325	0.0231	Up	Intron (ENSMUST00000078505.13/104001, intron 3 of 8)	-15304	Rtn1	chr12	72251995	72252435	441	L1MB7	LINE	L1	289
chr2	165249984	165250433	450	6.52	6.87	6.05	0.81	0.00522	0.0334	Up	Distal Intergenic	-15131	Cdh22	.	.	.	.	.	.	.	.
chr2	165191508	165191875	368	8.6	9.03	7.98	1.05	5.87e-06	0.000107	Up	Intron (ENSMUST00000065438.12/104010, intron 1 of 11)	-10049	Cdh22	chr2	165191428	165191541	114	MIR	SINE	MIR	33
chr2	165191508	165191875	368	8.6	9.03	7.98	1.05	5.87e-06	0.000107	Up	Intron (ENSMUST00000065438.12/104010, intron 1 of 11)	-10049	Cdh22	chr2	165191798	165191888	91	MIRb	SINE	MIR	77
chr2	165217445	165217727	283	7.16	7.69	6.32	1.37	2.42e-06	4.89e-05	Up	Intron (ENSMUST00000065438.12/104010, intron 1 of 11)	17126	Cdh22	chr2	165217483	165218066	584	L2a	LINE	L2	244
chr2	165145933	165146089	157	5	5.48	4.29	1.18	0.00209	0.0163	Up	Intron (ENSMUST00000065438.12/104010, intron 5 of 11)	35370	Cdh22	.	.	.	.	.	.	.	.
chr18	60597295	60597401	107	6.18	6.73	5.29	1.44	2.03e-05	0.000323	Up	Intron (ENSMUST00000097566.9/104027, intron 2 of 2)	3096	Synpo	chr18	60597280	60597456	177	B2_Mm2	SINE	B2	106
chr13	54771068	54771218	151	6.23	7.03	4.24	2.79	1.16e-16	9.07e-15	Up	Distal Intergenic	-4473	Sncb	chr13	54771095	54771456	362	IAPLTR1a_Mm	LTR	ERVK	123
chr18	63901421	63901967	547	6.25	6.7	5.59	1.11	0.000519	0.00524	Up	Intron (ENSMUST00000072726.5/104082, intron 21 of 27)	192726	Wdr7	chr18	63901337	63901550	214	MTB	LTR	ERVL-MaLR	129
chr18	63901421	63901967	547	6.25	6.7	5.59	1.11	0.000519	0.00524	Up	Intron (ENSMUST00000072726.5/104082, intron 21 of 27)	192726	Wdr7	chr18	63901660	63901681	22	AT_rich	Low_complexity	Low_complexity	21
chr18	63789119	63789409	291	6.32	7.04	4.83	2.21	7.85e-14	4.79e-12	Up	Intron (ENSMUST00000072726.5/104082, intron 16 of 27)	80424	Wdr7	chr18	63789062	63789168	107	B1_Mus1	SINE	Alu	49
chr18	63789119	63789409	291	6.32	7.04	4.83	2.21	7.85e-14	4.79e-12	Up	Intron (ENSMUST00000072726.5/104082, intron 16 of 27)	80424	Wdr7	chr18	63789067	63789182	116	MT2B	LTR	ERVL	63
chr18	63898576	63898765	190	4.66	5.26	3.61	1.65	0.000377	0.00402	Up	Intron (ENSMUST00000072726.5/104082, intron 21 of 27)	189881	Wdr7	.	.	.	.	.	.	.	.
chr1	74723889	74723995	107	5.16	5.74	4.17	1.57	4.8e-05	0.000686	Up	Intron (ENSMUST00000027356.6/104086, intron 1 of 8)	10315	Cyp27a1	chr1	74723846	74724052	207	B3	SINE	B2	106
chr9	118669879	118670095	217	5.28	5.79	4.47	1.32	0.00108	0.00957	Up	Intron (ENSMUST00000044165.13/104099, intron 9 of 27)	-15740	Itga9	chr9	118669918	118670236	319	MER2	DNA	TcMar-Tigger	177
chr9	118815697	118815797	101	4.62	5.4	2.79	2.6	8.16e-08	2.26e-06	Up	Intron (ENSMUST00000044165.13/104099, intron 18 of 27)	8413	Itga9	chr9	118815643	118815842	200	B3A	SINE	B2	100
chr9	118653201	118653309	109	4.57	5.33	2.84	2.5	8.09e-07	1.83e-05	Up	Intron (ENSMUST00000044165.13/104099, intron 5 of 27)	-32526	Itga9	chr9	118653201	118653231	31	(TG)n	Simple_repeat	Simple_repeat	30
chr9	118653201	118653309	109	4.57	5.33	2.84	2.5	8.09e-07	1.83e-05	Up	Intron (ENSMUST00000044165.13/104099, intron 5 of 27)	-32526	Itga9	chr9	118653234	118653384	151	B3A	SINE	B2	75
chr12	4194733	4195280	548	7.31	7.67	6.83	0.84	0.00691	0.0414	Up	Promoter (<=1kb)	0	Adcy3	.	.	.	.	.	.	.	.
chr11	100536098	100536271	174	5.07	5.67	4	1.67	2.44e-05	0.000379	Up	Distal Intergenic	-8098	Acly	chr11	100535813	100536461	649	RMER19A	LTR	ERVK	173
chr11	100494144	100494407	264	6.75	7.15	6.2	0.94	0.000305	0.00336	Up	Promoter (<=1kb)	0	Acly	chr11	100494198	100494626	429	IAPLTR2a	LTR	ERVK	209
chr16	22354373	22354476	104	4.11	4.75	2.94	1.81	0.0027	0.02	Up	Distal Intergenic	47353	Etv5	chr16	22354327	22354549	223	B3A	SINE	B2	103
chr16	22402685	22403062	378	5.86	6.44	4.89	1.54	5.96e-06	0.000109	Up	Promoter (<=1kb)	-856	Etv5	chr16	22402723	22402837	115	ORR1C2	LTR	ERVL-MaLR	114
chr16	22402685	22403062	378	5.86	6.44	4.89	1.54	5.96e-06	0.000109	Up	Promoter (<=1kb)	-856	Etv5	chr16	22402837	22402965	129	B1_Mus2	SINE	Alu	128
chr16	22402685	22403062	378	5.86	6.44	4.89	1.54	5.96e-06	0.000109	Up	Promoter (<=1kb)	-856	Etv5	chr16	22402965	22403255	291	ORR1C2	LTR	ERVL-MaLR	97
chr3	106252270	106252462	193	5.74	6.11	5.26	0.85	0.00681	0.0409	Up	Distal Intergenic	-32763	Chil4	chr3	106252205	106252523	319	RLTR13E	LTR	ERVK	192
chr17	86956970	86957105	136	7.03	7.81	5.21	2.6	1.54e-18	1.4e-16	Up	Distal Intergenic	-5977	Rhoq	chr17	86956898	86957328	431	MMERGLN_LTR	LTR	ERV1	135
chr10	75760438	75760567	130	5.67	6.2	4.81	1.39	0.000143	0.00176	Up	Intron (ENSMUST00000001712.7/104248, intron 1 of 36)	3703	Cabin1	chr10	75760399	75760604	206	B3	SINE	B2	129
chr10	75676902	75677092	191	5.72	6.16	5.07	1.09	0.00165	0.0135	Up	Intron (ENSMUST00000001712.7/104248, intron 29 of 36)	-8808	Cabin1	.	.	.	.	.	.	.	.
chr15	83156910	83157717	808	9.36	9.82	8.67	1.14	1.31e-06	2.81e-05	Up	3' UTR	7266	Rnu12	chr15	83156895	83157060	166	L4_A_Mam	LINE	RTE-X	150
chr9	55525813	55525988	176	5.29	6.05	3.64	2.4	1.83e-08	5.69e-07	Up	Distal Intergenic	-12684	Isl2	chr9	55525792	55525976	185	B3	SINE	B2	163
chr9	55525813	55525988	176	5.29	6.05	3.64	2.4	1.83e-08	5.69e-07	Up	Distal Intergenic	-12684	Isl2	chr9	55525976	55525996	21	MTD	LTR	ERVL-MaLR	12
chr5	106418796	106419070	275	8.99	9.86	6.45	3.41	6.06e-39	2.94e-36	Up	Distal Intergenic	39096	Barhl2	chr5	106418715	106419147	433	RLTR10C	LTR	ERVK	274
chr5	106426181	106426309	129	4.11	4.8	2.72	2.08	0.000953	0.00865	Up	Distal Intergenic	31857	Barhl2	chr5	106426158	106426363	206	B3	SINE	B2	128
chr19	7273643	7273742	100	5.39	5.99	4.34	1.65	7.09e-06	0.000127	Up	Intron (ENSMUST00000066646.10/104383, intron 9 of 11)	2691	Rcor2	chr19	7273598	7273743	146	B3	SINE	B2	99
chr19	7273643	7273742	100	5.39	5.99	4.34	1.65	7.09e-06	0.000127	Up	Intron (ENSMUST00000066646.10/104383, intron 9 of 11)	2691	Rcor2	chr19	7273722	7273772	51	B2_Mm2	SINE	B2	20
chr8	105303513	105303725	213	6.05	6.56	5.24	1.32	3.21e-05	0.000483	Up	Promoter (<=1kb)	-200	E2f4	chr8	105303372	105303514	143	B1_Mus1	SINE	Alu	1
chr8	105303513	105303725	213	6.05	6.56	5.24	1.32	3.21e-05	0.000483	Up	Promoter (<=1kb)	-200	E2f4	chr8	105303586	105303644	59	ID4_	SINE	ID	58
chr8	105303513	105303725	213	6.05	6.56	5.24	1.32	3.21e-05	0.000483	Up	Promoter (<=1kb)	-200	E2f4	chr8	105303588	105303664	77	B4A	SINE	B4	76
chr2	91989866	91990037	172	5.49	6.23	3.85	2.39	1.23e-10	5.23e-09	Up	Intron (ENSMUST00000028663.4/26427, intron 8 of 11)	-14002	Dgkz	chr2	91989814	91990023	210	B3	SINE	B2	157
chr9	48465798	48465963	166	5.11	5.86	3.44	2.42	2.47e-07	6.2e-06	Up	Downstream (2-3kb)	6257	Rexo2	chr9	48465783	48465924	142	B3A	SINE	B2	126
chr9	48465798	48465963	166	5.11	5.86	3.44	2.42	2.47e-07	6.2e-06	Up	Downstream (2-3kb)	6257	Rexo2	chr9	48465931	48466120	190	URR1A	DNA	hAT-Charlie	32
chr9	48466956	48467125	170	5.98	6.53	5.07	1.46	1.85e-05	0.000297	Up	Downstream (1-2kb)	5095	Rexo2	chr9	48466972	48467139	168	B3A	SINE	B2	153
chr11	35839061	35839204	144	6.2	6.79	5.18	1.61	9.84e-06	0.00017	Up	3' UTR	-4555	Rars	.	.	.	.	.	.	.	.
chr11	35842725	35842816	92	4.97	5.66	3.61	2.05	1.88e-06	3.9e-05	Up	Intron (ENSMUST00000018993.6/211652, intron 20 of 22)	-8219	Rars	chr11	35842706	35842865	160	B2_Mm1a	SINE	B2	91
chr11	35837804	35838016	213	6.59	7.12	5.74	1.37	1.67e-07	4.35e-06	Up	Downstream (<1kb)	-3298	Rars	chr11	35837821	35837926	106	B3A	SINE	B2	105
chr11	35837804	35838016	213	6.59	7.12	5.74	1.37	1.67e-07	4.35e-06	Up	Downstream (<1kb)	-3298	Rars	chr11	35837934	35838131	198	B3	SINE	B2	82
chr11	5551550	5551790	241	5.76	6.45	4.42	2.03	1.76e-09	6.41e-08	Up	Distal Intergenic	-9363	Ccdc117	chr11	5551481	5552183	703	RMER6A	LTR	ERVK	240
chr11	79491744	79491884	141	5.38	5.99	4.3	1.69	6.08e-05	0.000843	Up	Intron (ENSMUST00000108251.8/18015, intron 35 of 56)	-7713	AU040972	.	.	.	.	.	.	.	.
chr11	49739095	49739330	236	6.25	6.95	4.83	2.13	1.24e-11	6e-10	Up	Distal Intergenic	-26372	Cnot6	chr11	49739131	49739350	220	B3	SINE	B2	199
chr11	32110000	32110174	175	5.73	6.58	3.43	3.15	3.16e-13	1.83e-11	Up	Distal Intergenic	-8772	Gm12108	chr11	32110001	32110041	41	(TG)n	Simple_repeat	Simple_repeat	40
chr11	32110000	32110174	175	5.73	6.58	3.43	3.15	3.16e-13	1.83e-11	Up	Distal Intergenic	-8772	Gm12108	chr11	32110041	32110230	190	B3	SINE	B2	133
chr11	32104818	32105004	187	5.95	6.73	4.14	2.59	3.61e-12	1.86e-10	Up	Distal Intergenic	-3590	Gm12108	chr11	32104507	32104872	366	RLTR9A2	LTR	ERVK	54
chr11	32104818	32105004	187	5.95	6.73	4.14	2.59	3.61e-12	1.86e-10	Up	Distal Intergenic	-3590	Gm12108	chr11	32104872	32105059	188	B3A	SINE	B2	132
chr12	100469609	100469768	160	4.33	5.05	2.85	2.21	4.03e-05	0.000589	Up	Intron (ENSMUST00000222411.1/ENSMUST00000222411.1, intron 2 of 2)	-3311	Ttc7b	chr12	100469171	100469874	704	L1MB7	LINE	L1	159
chr12	13085624	13085720	97	4.56	5.15	3.57	1.58	0.000773	0.00728	Up	Distal Intergenic	143659	Ddx1	chr12	13085552	13085742	191	B3A	SINE	B2	96
chr12	54675549	54675678	130	3.85	4.62	2.09	2.54	6.88e-05	0.000938	Up	Intron (ENSMUST00000161592.7/66266, intron 5 of 5)	-18976	Sptssa	chr12	54675473	54675661	189	B3	SINE	B2	112
chr12	112085888	112086339	452	6.97	7.46	6.24	1.21	1.27e-05	0.000213	Up	Distal Intergenic	-20340	Aspg	.	.	.	.	.	.	.	.
chr9	110400074	110400196	123	4.49	4.99	3.71	1.28	0.00574	0.0359	Up	Intron (ENSMUST00000040021.11/104831, intron 1 of 24)	8017	Ptpn23	.	.	.	.	.	.	.	.
chr9	110412916	110413206	291	6.82	7.22	6.27	0.95	0.000567	0.00565	Up	Distal Intergenic	-4703	Ptpn23	chr9	110412815	110412934	120	B1_Mur3	SINE	Alu	18
chr12	110946025	110946713	689	8.38	8.69	7.98	0.71	0.00236	0.018	Up	3' UTR	30974	Tecpr2	chr12	110946695	110946867	173	B3	SINE	B2	18
chr12	99934306	99934531	226	5.52	6.25	3.97	2.28	2.58e-08	7.8e-07	Up	Intron (ENSMUST00000151019.7/104884, intron 13 of 13)	18840	Tdp1	chr12	99934286	99934460	175	B3	SINE	B2	154
chr12	99934306	99934531	226	5.52	6.25	3.97	2.28	2.58e-08	7.8e-07	Up	Intron (ENSMUST00000151019.7/104884, intron 13 of 13)	18840	Tdp1	chr12	99934508	99934655	148	B1_Mus1	SINE	Alu	23
chr12	99902437	99902828	392	7.27	7.68	6.69	0.98	0.000817	0.00761	Up	Intron (ENSMUST00000151019.7/104884, intron 6 of 13)	-8820	Tdp1	.	.	.	.	.	.	.	.
chr12	99888508	99888683	176	8.35	9.21	5.93	3.28	3.48e-35	1.21e-32	Up	Promoter (2-3kb)	2024	Tdp1	chr12	99888407	99888842	436	RLTR10C	LTR	ERVK	175
chr12	105511744	105512403	660	7.19	7.53	6.74	0.8	0.00248	0.0187	Up	Promoter (1-2kb)	-1077	AU015791	.	.	.	.	.	.	.	.
chr12	105504719	105505046	328	5.91	6.48	4.94	1.54	0.000114	0.00145	Up	Distal Intergenic	-8434	AU015791	chr12	105504613	105504802	190	B4	SINE	B4	83
chr12	105504719	105505046	328	5.91	6.48	4.94	1.54	0.000114	0.00145	Up	Distal Intergenic	-8434	AU015791	chr12	105504844	105505015	172	B3	SINE	B2	171
chr12	105504719	105505046	328	5.91	6.48	4.94	1.54	0.000114	0.00145	Up	Distal Intergenic	-8434	AU015791	chr12	105505017	105505098	82	(GA)n	Simple_repeat	Simple_repeat	29
chr12	105521526	105521681	156	5.38	5.87	4.62	1.25	0.00118	0.0103	Up	Distal Intergenic	8046	AU015791	.	.	.	.	.	.	.	.
chr12	105534921	105535231	311	6.42	6.89	5.71	1.18	0.000187	0.00222	Up	Distal Intergenic	21441	AU015791	chr12	105534797	105535182	386	RMER20C_Mm	LTR	ERVK	261
chr12	14069012	14069469	458	7.83	8.17	7.38	0.78	0.0064	0.039	Up	Distal Intergenic	81880	Lratd1	chr12	14068875	14069759	885	RMER19B	LTR	ERVK	457
chr13	115031288	115031861	574	6.89	7.24	6.42	0.82	0.00216	0.0168	Up	Intron (ENSMUST00000061673.8/109700, intron 3 of 28)	58325	Pelo	.	.	.	.	.	.	.	.
chr13	107419851	107419999	149	5.08	5.74	3.84	1.9	7.44e-07	1.69e-05	Up	Distal Intergenic	-49823	AI197445	chr13	107419833	107420031	199	B3	SINE	B2	148
chr13	79563516	79563679	164	7.61	8.05	6.98	1.08	7.12e-06	0.000128	Up	Distal Intergenic	-1319705	Arrdc3	chr13	79563514	79563852	339	IAPLTR1a_Mm	LTR	ERVK	163
chr13	79570260	79570447	188	7.75	8.09	7.31	0.78	0.000623	0.00611	Up	Distal Intergenic	-1312937	Arrdc3	chr13	79563852	79570277	6426	IAPEz-int	LTR	ERVK	17
chr13	79570260	79570447	188	7.75	8.09	7.31	0.78	0.000623	0.00611	Up	Distal Intergenic	-1312937	Arrdc3	chr13	79570281	79570619	339	IAPLTR1a_Mm	LTR	ERVK	166
chr5	15555219	15555825	607	9.2	9.59	8.68	0.9	4.78e-06	8.95e-05	Up	Intron (ENSMUST00000178227.5/ENSMUST00000178227.5, intron 2 of 2)	-21508	Gm21083	.	.	.	.	.	.	.	.
chr6	145178051	145178379	329	5.95	6.59	4.75	1.84	2.57e-08	7.79e-07	Up	Intron (ENSMUST00000111727.7/320662, intron 11 of 11)	-3896	Gm15543	chr6	145178074	145178148	75	B3	SINE	B2	74
chr6	145178051	145178379	329	5.95	6.59	4.75	1.84	2.57e-08	7.79e-07	Up	Intron (ENSMUST00000111727.7/320662, intron 11 of 11)	-3896	Gm15543	chr6	145178378	145178441	64	B1_Mur3	SINE	Alu	1
chr8	47792054	47792251	198	4.95	5.39	4.31	1.08	0.00627	0.0384	Up	Distal Intergenic	25970	1700061N14Rik	.	.	.	.	.	.	.	.
chr4	106093365	106093511	147	4.95	5.44	4.19	1.24	0.00342	0.0241	Up	Intron (ENSMUST00000130088.1/ENSMUST00000130088.1, intron 3 of 4)	-147705	Gm12724	chr4	106093335	106093527	193	B3	SINE	B2	146
chr4	106244135	106245150	1016	7.98	8.28	7.6	0.68	0.0026	0.0194	Up	Exon (ENSMUST00000140196.1/105244641, exon 2 of 5)	2919	Gm12724	chr4	106244060	106244207	148	B1_Mm	SINE	Alu	72
chr4	106244135	106245150	1016	7.98	8.28	7.6	0.68	0.0026	0.0194	Up	Exon (ENSMUST00000140196.1/105244641, exon 2 of 5)	2919	Gm12724	chr4	106244210	106244410	201	LTR16A1	LTR	ERVL	200
chr4	106249169	106249308	140	5.05	5.63	4.07	1.56	9.76e-05	0.00127	Up	Intron (ENSMUST00000140196.1/105244641, intron 2 of 4)	7953	Gm12724	chr4	106249167	106249331	165	B2_Mm1t	SINE	B2	139
chr4	105714079	105714244	166	4.56	5.23	3.27	1.96	6.99e-05	0.00095	Up	Distal Intergenic	-526972	Gm12724	.	.	.	.	.	.	.	.
chr4	105851978	105852097	120	3.93	4.51	2.96	1.55	0.00461	0.0303	Up	Distal Intergenic	-389119	Gm12724	chr4	105851789	105852084	296	ORR1C2	LTR	ERVL-MaLR	106
chr13	38545188	38545622	435	6.82	7.19	6.31	0.88	0.00292	0.0212	Up	Distal Intergenic	-16364	Txndc5	.	.	.	.	.	.	.	.
chr10	67711969	67712307	339	6.39	6.73	5.93	0.81	0.00596	0.0369	Up	Intron (ENSMUST00000218164.1/ENSMUST00000218164.1, intron 2 of 2)	-140010	4930563J15Rik	.	.	.	.	.	.	.	.
chr10	67671651	67672588	938	10.52	11.39	8.01	3.37	1.21e-55	1.72e-52	Up	Distal Intergenic	-99692	4930563J15Rik	chr10	67671577	67672075	499	RLTR10C	LTR	ERVK	424
chr10	67674666	67674950	285	7.57	8.29	6.07	2.22	3.74e-15	2.58e-13	Up	Distal Intergenic	-102707	4930563J15Rik	chr10	67674621	67674679	59	Lx5	LINE	L1	13
chr10	67674666	67674950	285	7.57	8.29	6.07	2.22	3.74e-15	2.58e-13	Up	Distal Intergenic	-102707	4930563J15Rik	chr10	67674679	67675110	432	RLTR10C	LTR	ERVK	271
chr12	98460043	98460193	151	5.43	6.13	4	2.14	2.96e-07	7.3e-06	Up	Intron (ENSMUST00000221240.1/72258, intron 4 of 6)	-63651	Gm40893	chr12	98460018	98460215	198	B3A	SINE	B2	150
chr12	98524402	98525272	871	9.43	9.72	9.06	0.66	0.00631	0.0386	Up	Promoter (<=1kb)	558	Gm40893	chr12	98524635	98524746	112	MIRc	SINE	MIR	111
chr12	98524402	98525272	871	9.43	9.72	9.06	0.66	0.00631	0.0386	Up	Promoter (<=1kb)	558	Gm40893	chr12	98525076	98525140	65	(TGG)n	Simple_repeat	Simple_repeat	64
chr12	98524402	98525272	871	9.43	9.72	9.06	0.66	0.00631	0.0386	Up	Promoter (<=1kb)	558	Gm40893	chr12	98525245	98525714	470	LTR16B2	LTR	ERVL	27
chr14	118221030	118221166	137	5.19	5.92	3.6	2.32	1.27e-07	3.4e-06	Up	Distal Intergenic	-15066	LOC105245869	chr14	118220997	118221203	207	B3	SINE	B2	136
chr14	118220307	118220635	329	5.67	6.44	3.9	2.54	9.03e-10	3.44e-08	Up	Distal Intergenic	-15597	LOC105245869	chr14	118219982	118220433	452	RMER15	LTR	ERVL	126
chr14	118203124	118203323	200	6.01	6.92	2.96	3.95	4.41e-22	5.29e-20	Up	Distal Intergenic	-32909	LOC105245869	chr14	118202996	118203171	176	L1Md_F2	LINE	L1	47
chr14	118203124	118203323	200	6.01	6.92	2.96	3.95	4.41e-22	5.29e-20	Up	Distal Intergenic	-32909	LOC105245869	chr14	118203198	118203288	91	B3A	SINE	B2	90
chr14	118207498	118207632	135	5.22	6.12	2.43	3.68	4.51e-14	2.82e-12	Up	Distal Intergenic	-28600	LOC105245869	chr14	118207478	118207669	192	B3A	SINE	B2	134
chr15	26031779	26031982	204	5.62	6.16	4.76	1.4	0.000689	0.00663	Up	Distal Intergenic	30456	Gm41279	.	.	.	.	.	.	.	.
chr15	37234330	37234539	210	5.07	5.69	3.96	1.73	0.000169	0.00203	Up	Promoter (1-2kb)	-1021	Gm16136	chr15	37234445	37234502	58	G-rich	Low_complexity	Low_complexity	57
chr15	37233741	37234260	520	6.26	6.64	5.75	0.89	0.0077	0.0449	Up	Promoter (<=1kb)	-432	Gm16136	.	.	.	.	.	.	.	.
chr18	77742466	77743007	542	7.32	7.77	6.66	1.11	0.00011	0.0014	Up	Distal Intergenic	-8996	A330094K24Rik	chr18	77742904	77743034	131	ID_B1	SINE	B4	103
chr18	77743614	77743866	253	6.28	6.91	5.14	1.77	2.04e-08	6.29e-07	Up	Distal Intergenic	-10144	A330094K24Rik	chr18	77743562	77743727	166	RSINE1	SINE	B4	113
chr18	77743614	77743866	253	6.28	6.91	5.14	1.77	2.04e-08	6.29e-07	Up	Distal Intergenic	-10144	A330094K24Rik	chr18	77743727	77743830	104	ORR1D1	LTR	ERVL-MaLR	103
chr18	77743614	77743866	253	6.28	6.91	5.14	1.77	2.04e-08	6.29e-07	Up	Distal Intergenic	-10144	A330094K24Rik	chr18	77743830	77744045	216	MTB_Mm	LTR	ERVL-MaLR	36
chr13	30695321	30695541	221	5.39	5.83	4.76	1.06	0.00496	0.032	Up	Intron (ENSMUST00000091672.12/105352, intron 3 of 7)	35220	Dusp22	.	.	.	.	.	.	.	.
chr13	4032578	4032834	257	5.9	6.42	5.07	1.35	0.000336	0.00364	Up	Distal Intergenic	-16177	Akr1c14	chr13	4032050	4032603	554	RLTR40	LTR	ERVK	25
chr13	52704611	52705104	494	7.54	8.04	6.75	1.3	9.17e-06	0.00016	Up	Distal Intergenic	30504	BB123696	chr13	52704509	52704637	129	B1_Mur4	SINE	Alu	26
chr13	52704611	52705104	494	7.54	8.04	6.75	1.3	9.17e-06	0.00016	Up	Distal Intergenic	30504	BB123696	chr13	52704545	52704716	172	MT2B2	LTR	ERVL	105
chr13	52704611	52705104	494	7.54	8.04	6.75	1.3	9.17e-06	0.00016	Up	Distal Intergenic	30504	BB123696	chr13	52704696	52704838	143	LTR67B	LTR	ERVL	142
chr13	52741506	52741662	157	4.72	5.43	3.26	2.17	2.35e-06	4.76e-05	Up	Intron (ENSMUST00000223209.1/105404, intron 1 of 2)	-5898	BB123696	chr13	52741129	52741759	631	RMER19A	LTR	ERVK	156
chr13	52828935	52829244	310	7.15	7.49	6.71	0.78	0.00678	0.0408	Up	Distal Intergenic	-71730	BB123696	chr13	52829234	52829267	34	G-rich	Low_complexity	Low_complexity	10
chr13	52833328	52833516	189	5.92	6.75	3.76	2.99	4.11e-17	3.33e-15	Up	Downstream (1-2kb)	-76123	BB123696	chr13	52833226	52833348	123	B1_Mur2	SINE	Alu	20
chr13	52833328	52833516	189	5.92	6.75	3.76	2.99	4.11e-17	3.33e-15	Up	Downstream (1-2kb)	-76123	BB123696	chr13	52833358	52833508	151	B3A	SINE	B2	150
chr14	103620314	103620501	188	7.11	7.91	5.2	2.71	6.17e-22	7.33e-20	Up	Distal Intergenic	-29727	Slain1	chr14	103620170	103620511	342	RLTR10C	LTR	ERVK	187
chr14	103630696	103630804	109	4.03	4.59	3.1	1.49	0.00673	0.0405	Up	Distal Intergenic	-19424	Slain1	.	.	.	.	.	.	.	.
chr14	103635283	103635460	178	6.3	6.89	5.28	1.61	8.93e-09	2.92e-07	Up	Distal Intergenic	-14768	Slain1	chr14	103635292	103635625	334	IAPLTR1a_Mm	LTR	ERVK	168
chr14	103643240	103643473	234	4.85	5.43	3.84	1.6	0.000362	0.00388	Up	Distal Intergenic	-6755	Slain1	chr14	103643300	103643604	305	L1MA4	LINE	L1	173
chr14	103642091	103642215	125	6	6.51	5.19	1.32	1.24e-05	0.000208	Up	Distal Intergenic	-8013	Slain1	chr14	103642024	103642357	334	IAPLTR1a_Mm	LTR	ERVK	124
chr14	121826220	121826430	211	6.17	6.57	5.61	0.96	0.00103	0.0092	Up	Distal Intergenic	-28383	Dock9	chr14	121826253	121826358	106	MIRb	SINE	MIR	105
chr14	121731730	121732288	559	6.79	7.38	5.79	1.59	1.52e-08	4.78e-07	Up	Intron (ENSMUST00000212376.2/105445, intron 1 of 54)	6573	Dock9	.	.	.	.	.	.	.	.
chr14	121804575	121804728	154	5.26	5.95	3.88	2.07	9.11e-08	2.5e-06	Up	Distal Intergenic	-6738	Dock9	chr14	121804541	121804750	210	B3	SINE	B2	153
chr14	121685475	121685638	164	5.28	5.7	4.67	1.03	0.00326	0.0231	Up	Intron (ENSMUST00000212376.2/105445, intron 1 of 54)	12779	Dock9	chr14	121684644	121685702	1059	RMER1B	Other	Other	163
chr14	121599300	121599615	316	6.53	6.97	5.88	1.1	0.00138	0.0117	Up	Promoter (1-2kb)	-1087	Dock9	.	.	.	.	.	.	.	.
chr14	34401201	34401574	374	7.46	7.84	6.96	0.88	0.000464	0.00479	Up	Intron (ENSMUST00000111908.2/105450, intron 6 of 6)	25480	Mmrn2	chr14	34401448	34401590	143	B1_Mus1	SINE	Alu	126
chr15	38702345	38703198	854	7.72	8.06	7.28	0.78	0.00208	0.0163	Up	Distal Intergenic	25318	Gm45924	chr15	38702765	38702808	44	ERVB7_1-LTR_MM	LTR	ERVK	43
chr15	38702345	38703198	854	7.72	8.06	7.28	0.78	0.00208	0.0163	Up	Distal Intergenic	25318	Gm45924	chr15	38703008	38703410	403	MTC	LTR	ERVL-MaLR	190
chr4	23283312	23283526	215	5.54	6.35	3.53	2.82	5.34e-12	2.7e-10	Up	Intron (ENSMUST00000131639.1/ENSMUST00000131639.1, intron 1 of 4)	792764	Gm30731	chr4	23283198	23283623	426	Lx	LINE	L1	214
chr4	23260553	23260837	285	8.52	9.39	5.91	3.48	6.2e-34	1.95e-31	Up	Exon (ENSMUST00000131639.1/ENSMUST00000131639.1, exon 1 of 5)	770005	Gm30731	chr4	23260545	23260905	361	RLTR44B	LTR	ERVK	284
chr4	23262267	23262689	423	6.95	7.82	4.43	3.39	7.08e-20	7.17e-18	Up	Intron (ENSMUST00000131639.1/ENSMUST00000131639.1, intron 1 of 4)	771719	Gm30731	chr4	23261047	23263612	2566	RLTR44-int	LTR	ERVK	422
chr4	23262807	23263972	1166	9.59	10.46	7.09	3.36	2.87e-35	1.01e-32	Up	Intron (ENSMUST00000131639.1/ENSMUST00000131639.1, intron 1 of 4)	772259	Gm30731	chr4	23261047	23263612	2566	RLTR44-int	LTR	ERVK	805
chr4	23262807	23263972	1166	9.59	10.46	7.09	3.36	2.87e-35	1.01e-32	Up	Intron (ENSMUST00000131639.1/ENSMUST00000131639.1, intron 1 of 4)	772259	Gm30731	chr4	23263614	23264009	396	RLTR44B	LTR	ERVK	358
chr14	48949195	48949777	583	9.01	9.88	6.39	3.49	5.63e-39	2.75e-36	Up	Distal Intergenic	70015	Exoc5	chr14	48949130	48949694	565	RLTR10C	LTR	ERVK	499
chr14	48949195	48949777	583	9.01	9.88	6.39	3.49	5.63e-39	2.75e-36	Up	Distal Intergenic	70015	Exoc5	chr14	48949694	48949998	305	L1MB2	LINE	L1	83
chr14	69728429	69728671	243	6.81	7.22	6.23	0.99	9.02e-05	0.00119	Up	Exon (ENSMUST00000224601.1/ENSMUST00000224601.1, exon 1 of 1)	3863	Chmp7	chr14	69728370	69728512	143	B1_Mur4	SINE	Alu	83
chr14	31923890	31924043	154	5.73	6.43	4.31	2.12	5.68e-08	1.61e-06	Up	Intron (ENSMUST00000143315.2/ENSMUST00000143315.2, intron 1 of 1)	-93239	Ankrd28	chr14	31923661	31924019	359	IAPLTR1a_Mm	LTR	ERVK	129
chr14	31923890	31924043	154	5.73	6.43	4.31	2.12	5.68e-08	1.61e-06	Up	Intron (ENSMUST00000143315.2/ENSMUST00000143315.2, intron 1 of 1)	-93239	Ankrd28	chr14	31924019	31924108	90	RSINE1	SINE	B4	24
chr14	31919504	31919673	170	6.27	6.92	5.05	1.87	1.75e-09	6.38e-08	Up	Intron (ENSMUST00000143315.2/ENSMUST00000143315.2, intron 1 of 1)	-88853	Ankrd28	chr14	31919320	31919669	350	IAPLTR1a_Mm	LTR	ERVK	165
chr14	31919504	31919673	170	6.27	6.92	5.05	1.87	1.75e-09	6.38e-08	Up	Intron (ENSMUST00000143315.2/ENSMUST00000143315.2, intron 1 of 1)	-88853	Ankrd28	chr14	31919669	31922616	2948	IAPEz-int	LTR	ERVK	4
chr14	120299775	120300068	294	6.73	7.16	6.11	1.05	0.000621	0.0061	Up	Promoter (2-3kb)	2101	Mbnl2	.	.	.	.	.	.	.	.
chr14	120306385	120306515	131	6.39	7.14	4.7	2.44	1.04e-13	6.28e-12	Up	Promoter (<=1kb)	0	Mbnl2	chr14	120306223	120306626	404	MTD	LTR	ERVL-MaLR	130
chr14	120256258	120256402	145	4.44	5.39	0.66	4.73	6.33e-10	2.46e-08	Up	Distal Intergenic	-19267	Mbnl2	chr14	120256206	120256385	180	B3A	SINE	B2	127
chr14	120390693	120390805	113	5.14	5.93	3.23	2.7	1.97e-08	6.08e-07	Up	Exon (ENSMUST00000227484.1/105559, exon 5 of 5)	-5682	Mbnl2	chr14	120390616	120390762	147	B3	SINE	B2	69
chr14	120324223	120324424	202	6.34	6.7	5.86	0.84	0.00585	0.0364	Up	Intron (ENSMUST00000088419.12/105559, intron 1 of 8)	17767	Mbnl2	chr14	120324394	120324462	69	(TCC)n	Simple_repeat	Simple_repeat	30
chr14	120345205	120345322	118	4.8	5.46	3.54	1.92	1.94e-05	0.000309	Up	Intron (ENSMUST00000088419.12/105559, intron 2 of 8)	-33919	Mbnl2	.	.	.	.	.	.	.	.
chr14	120341988	120342200	213	5.71	6.16	5.03	1.13	0.00732	0.0432	Up	Intron (ENSMUST00000088419.12/105559, intron 2 of 8)	35532	Mbnl2	.	.	.	.	.	.	.	.
chr14	120433837	120434149	313	6.44	6.9	5.77	1.13	0.000239	0.00273	Up	Distal Intergenic	37350	Mbnl2	.	.	.	.	.	.	.	.
chr14	79269501	79270086	586	7.32	7.75	6.69	1.06	5.06e-06	9.43e-05	Up	Distal Intergenic	-22132	Zfp957	chr14	79269555	79269747	193	MLT1I	LTR	ERVL-MaLR	192
chr14	79269501	79270086	586	7.32	7.75	6.69	1.06	5.06e-06	9.43e-05	Up	Distal Intergenic	-22132	Zfp957	chr14	79269787	79269868	82	L2b	LINE	L2	81
chr14	79269501	79270086	586	7.32	7.75	6.69	1.06	5.06e-06	9.43e-05	Up	Distal Intergenic	-22132	Zfp957	chr14	79269898	79270645	748	RMER6A	LTR	ERVK	188
chr14	103132088	103132336	249	6.28	6.78	5.51	1.27	0.000116	0.00147	Up	Intron (ENSMUST00000161008.7/105689, intron 16 of 27)	-16692	Mycbp2	chr14	103132142	103132325	184	B3	SINE	B2	183
chr15	95931096	95931305	210	6.61	7.28	5.35	1.93	4.12e-11	1.88e-09	Up	Intron (ENSMUST00000071874.7/105722, intron 9 of 19)	-7289	Ano6	.	.	.	.	.	.	.	.
chr15	95914921	95915368	448	6.99	7.4	6.42	0.98	0.000634	0.0062	Up	Intron (ENSMUST00000071874.7/105722, intron 6 of 19)	-23226	Ano6	chr15	95914739	95914990	252	Tigger12	DNA	TcMar-Tigger	69
chr15	95931407	95931748	342	8.67	9.13	7.98	1.15	5.04e-06	9.38e-05	Up	Intron (ENSMUST00000071874.7/105722, intron 9 of 19)	-6846	Ano6	.	.	.	.	.	.	.	.
chr15	96561521	96562093	573	10.27	11.16	7.51	3.65	1.09e-59	2.13e-56	Up	Distal Intergenic	17491	Slc38a1	chr15	96561540	96562047	508	RLTR10C	LTR	ERVK	507
chr15	96622504	96622652	149	5.14	5.89	3.45	2.44	1.15e-06	2.51e-05	Up	Intron (ENSMUST00000088454.12/105727, intron 2 of 15)	19310	Slc38a1	chr15	96622453	96622661	209	B3A	SINE	B2	148
chr15	96617670	96617799	130	4.37	4.95	3.39	1.56	0.00651	0.0395	Up	Intron (ENSMUST00000088454.12/105727, intron 2 of 15)	24163	Slc38a1	chr15	96617668	96617749	82	MTC	LTR	ERVL-MaLR	79
chr15	96617670	96617799	130	4.37	4.95	3.39	1.56	0.00651	0.0395	Up	Intron (ENSMUST00000088454.12/105727, intron 2 of 15)	24163	Slc38a1	chr15	96617749	96617941	193	L1_Mus3	LINE	L1	50
chr11	107155173	107155642	470	7.97	8.53	7.03	1.5	9.45e-08	2.59e-06	Up	Promoter (1-2kb)	-1766	Gm11715	chr11	107155145	107155184	40	B1_Mus2	SINE	Alu	11
chr11	107155173	107155642	470	7.97	8.53	7.03	1.5	9.45e-08	2.59e-06	Up	Promoter (1-2kb)	-1766	Gm11715	chr11	107155184	107155749	566	RMER19A	LTR	ERVK	458
chr11	107151942	107152086	145	5.1	5.53	4.48	1.05	0.00682	0.0409	Up	Distal Intergenic	-5322	Gm11715	.	.	.	.	.	.	.	.
chr15	73576107	73576206	100	4.52	5.09	3.54	1.55	0.00189	0.015	Up	Downstream (1-2kb)	9029	Dennd3	chr15	73576060	73576243	184	B3A	SINE	B2	99
chr15	78815343	78815758	416	5.73	6.16	5.13	1.03	0.00812	0.0467	Up	Distal Intergenic	-12301	Card10	chr15	78815213	78815346	134	B1_Mur1	SINE	Alu	3
chr15	78815343	78815758	416	5.73	6.16	5.13	1.03	0.00812	0.0467	Up	Distal Intergenic	-12301	Card10	chr15	78815447	78815655	209	L1MB5	LINE	L1	208
chr15	87448369	87448644	276	6.58	7.4	4.5	2.89	6.89e-18	5.99e-16	Up	Distal Intergenic	-95655	Tafa5	.	.	.	.	.	.	.	.
chr15	86921195	86921864	670	7.16	7.54	6.63	0.91	0.000373	0.00398	Up	Distal Intergenic	-622435	Tafa5	chr15	86920798	86921330	533	MTE2b-int	LTR	ERVL-MaLR	135
chr15	86921195	86921864	670	7.16	7.54	6.63	0.91	0.000373	0.00398	Up	Distal Intergenic	-622435	Tafa5	chr15	86921535	86921838	304	MTE2b	LTR	ERVL-MaLR	303
chr15	87352955	87353079	125	5.19	5.68	4.44	1.24	0.00103	0.0092	Up	Distal Intergenic	-191220	Tafa5	chr15	87353077	87353306	230	B4A	SINE	B4	2
chr15	87320067	87320177	111	4.59	5.33	2.99	2.34	1.34e-06	2.88e-05	Up	Distal Intergenic	-224122	Tafa5	chr15	87320045	87320223	179	B3A	SINE	B2	110
chr15	87367531	87367679	149	5.55	6.29	3.97	2.32	9.89e-11	4.28e-09	Up	Distal Intergenic	-176620	Tafa5	chr15	87367494	87367707	214	B3	SINE	B2	148
chr15	87447515	87448200	686	7.9	8.62	6.39	2.23	6.29e-14	3.88e-12	Up	Distal Intergenic	-96099	Tafa5	.	.	.	.	.	.	.	.
chr15	86913344	86913580	237	6.1	6.44	5.65	0.79	0.00491	0.0318	Up	Distal Intergenic	-630719	Tafa5	chr15	86913108	86913813	706	L1M5	LINE	L1	236
chr15	86906872	86907132	261	5.08	5.62	4.23	1.39	0.00253	0.019	Up	Distal Intergenic	-637167	Tafa5	.	.	.	.	.	.	.	.
chr15	87200755	87200948	194	4.85	5.41	3.92	1.49	0.00094	0.00855	Up	Distal Intergenic	-343351	Tafa5	.	.	.	.	.	.	.	.
chr15	93639414	93639626	213	7.79	8.58	5.89	2.69	1.13e-26	1.92e-24	Up	Distal Intergenic	-43523	Prickle1	chr15	93639290	93639720	431	RLTR10C	LTR	ERVK	212
chr15	3905548	3905866	319	6.19	6.58	5.65	0.92	0.00483	0.0314	Up	Distal Intergenic	66116	Fbxo4	chr15	3905470	3905643	174	LTR90A	LTR	LTR	95
chr15	3988092	3988218	127	4.98	5.49	4.18	1.31	0.00106	0.00943	Up	Intron (ENSMUST00000046633.9/106064, intron 5 of 5)	3860	AW549877	chr15	3988131	3988208	78	B3A	SINE	B2	77
chr15	3988092	3988218	127	4.98	5.49	4.18	1.31	0.00106	0.00943	Up	Intron (ENSMUST00000046633.9/106064, intron 5 of 5)	3860	AW549877	chr15	3988199	3988300	102	RLTR17B_Mm	LTR	ERVK	19
chr15	73616109	73616472	364	6.72	7.11	6.2	0.91	0.00419	0.0281	Up	Promoter (<=1kb)	852	Slc45a4	chr15	73616427	73616554	128	B1F2	SINE	Alu	45
chr16	11154655	11154764	110	4.86	5.55	3.49	2.06	2.02e-06	4.16e-05	Up	Promoter (1-2kb)	1312	Zc3h7a	chr16	11154612	11154823	212	B3	SINE	B2	109
chr16	43888223	43888475	253	6.2	6.7	5.44	1.26	0.00033	0.00358	Up	Promoter (1-2kb)	1173	Qtrt2	chr16	43888169	43888524	356	ORR1C2	LTR	ERVL-MaLR	252
chr16	33163738	33163978	241	6.33	6.81	5.6	1.21	3.83e-05	0.000563	Up	Distal Intergenic	-21093	Osbpl11	chr16	33163938	33164078	141	B1_Mus2	SINE	Alu	40
chr16	33166338	33166512	175	6.16	6.77	5.06	1.72	1.24e-07	3.33e-06	Up	Distal Intergenic	-18559	Osbpl11	chr16	33166318	33166528	211	B3	SINE	B2	174
chr16	62758388	62758658	271	6.41	6.79	5.89	0.9	0.000904	0.00828	Up	Intron (ENSMUST00000063089.11/106338, intron 5 of 5)	8465	Nsun3	chr16	62758292	62759296	1005	RMER21A	LTR	ERV1	270
chr16	61772348	61772769	422	7.59	8.21	6.47	1.75	0.0024	0.0182	Up	Distal Intergenic	994354	Nsun3	chr16	61772293	61772672	380	RLTR26D_MM	LTR	ERVK	324
chr16	61772348	61772769	422	7.59	8.21	6.47	1.75	0.0024	0.0182	Up	Distal Intergenic	994354	Nsun3	chr16	61772726	61772828	103	RMER6D	LTR	ERVK	43
chr16	36710913	36711076	164	5.26	6.16	2.4	3.76	5.32e-15	3.62e-13	Up	Intron (ENSMUST00000023617.12/106347, intron 3 of 7)	-4462	Ildr1	chr16	36710878	36711067	190	B3A	SINE	B2	154
chr16	36710913	36711076	164	5.26	6.16	2.4	3.76	5.32e-15	3.62e-13	Up	Intron (ENSMUST00000023617.12/106347, intron 3 of 7)	-4462	Ildr1	chr16	36711067	36711096	30	(CA)n	Simple_repeat	Simple_repeat	9
chr16	17076401	17076604	204	6.53	7.39	4.11	3.28	1.15e-22	1.45e-20	Up	Intron (ENSMUST00000035682.15/106369, intron 1 of 4)	6097	Ypel1	chr16	17076225	17076420	196	B2_Mm2	SINE	B2	19
chr16	17076401	17076604	204	6.53	7.39	4.11	3.28	1.15e-22	1.45e-20	Up	Intron (ENSMUST00000035682.15/106369, intron 1 of 4)	6097	Ypel1	chr16	17076420	17076613	194	B3	SINE	B2	184
chr16	4540117	4540594	478	8.03	8.66	6.89	1.78	2.39e-08	7.28e-07	Up	Promoter (1-2kb)	1220	Srl	chr16	4540189	4540254	66	(CATATA)n	Simple_repeat	Simple_repeat	65
chr16	4540117	4540594	478	8.03	8.66	6.89	1.78	2.39e-08	7.28e-07	Up	Promoter (1-2kb)	1220	Srl	chr16	4540263	4540396	134	ID_B1	SINE	B4	133
chr16	4540117	4540594	478	8.03	8.66	6.89	1.78	2.39e-08	7.28e-07	Up	Promoter (1-2kb)	1220	Srl	chr16	4540418	4540594	177	B3A	SINE	B2	176
chr16	4508656	4509133	478	5.93	6.41	5.21	1.2	0.00173	0.014	Up	Intron (ENSMUST00000090500.9/106393, intron 1 of 5)	13930	Srl	chr16	4508382	4508881	500	RLTR11C_MM	LTR	ERVK	225
chr16	4508656	4509133	478	5.93	6.41	5.21	1.2	0.00173	0.014	Up	Intron (ENSMUST00000090500.9/106393, intron 1 of 5)	13930	Srl	chr16	4509082	4509179	98	MIRc	SINE	MIR	51
chr16	4474779	4475397	619	9.41	9.71	9.03	0.67	0.0038	0.0261	Up	Distal Intergenic	47666	Srl	.	.	.	.	.	.	.	.
chr17	8328527	8328747	221	5.6	6.13	4.72	1.41	0.00011	0.0014	Up	Intron (ENSMUST00000140890.2/21331, intron 1 of 5)	4141	Sft2d1	chr17	8328407	8328554	148	B1_Mus1	SINE	Alu	27
chr17	8328527	8328747	221	5.6	6.13	4.72	1.41	0.00011	0.0014	Up	Intron (ENSMUST00000140890.2/21331, intron 1 of 5)	4141	Sft2d1	chr17	8328554	8328718	165	B3	SINE	B2	164
chr17	29015705	29015883	179	6.02	6.44	5.43	1	0.00149	0.0124	Up	Exon (ENSMUST00000137730.1/ENSMUST00000137730.1, exon 1 of 2)	-7710	Stk38	chr17	29015732	29015923	192	B3	SINE	B2	151
chr17	29018369	29019008	640	6.93	7.32	6.38	0.94	0.000184	0.00218	Up	Intron (ENSMUST00000233272.1/ENSMUST00000233272.1, intron 1 of 2)	-10374	Stk38	chr17	29018448	29018547	100	B1F	SINE	Alu	99
chr17	29018369	29019008	640	6.93	7.32	6.38	0.94	0.000184	0.00218	Up	Intron (ENSMUST00000233272.1/ENSMUST00000233272.1, intron 1 of 2)	-10374	Stk38	chr17	29018625	29018717	93	L1ME4b	LINE	L1	92
chr17	29018369	29019008	640	6.93	7.32	6.38	0.94	0.000184	0.00218	Up	Intron (ENSMUST00000233272.1/ENSMUST00000233272.1, intron 1 of 2)	-10374	Stk38	chr17	29018732	29018900	169	B3	SINE	B2	168
chr17	29018369	29019008	640	6.93	7.32	6.38	0.94	0.000184	0.00218	Up	Intron (ENSMUST00000233272.1/ENSMUST00000233272.1, intron 1 of 2)	-10374	Stk38	chr17	29018900	29018924	25	(CA)n	Simple_repeat	Simple_repeat	24
chr17	29018369	29019008	640	6.93	7.32	6.38	0.94	0.000184	0.00218	Up	Intron (ENSMUST00000233272.1/ENSMUST00000233272.1, intron 1 of 2)	-10374	Stk38	chr17	29018924	29018964	41	B3A	SINE	B2	40
chr17	28986944	28987098	155	5.72	6.15	5.11	1.04	0.00262	0.0194	Up	Intron (ENSMUST00000009138.12/106504, intron 5 of 13)	-3198	Stk38	chr17	28986928	28987129	202	B3	SINE	B2	154
chr17	83148403	83148782	380	6.08	6.71	4.95	1.76	6.33e-07	1.46e-05	Up	Distal Intergenic	-66510	Pkdcc	.	.	.	.	.	.	.	.
chr17	83224583	83224955	373	5.98	6.4	5.39	1.02	0.00262	0.0195	Up	3' UTR	3548	Pkdcc	.	.	.	.	.	.	.	.
chr8	83596512	83596623	112	5.73	6.16	5.13	1.03	0.00453	0.0299	Up	Promoter (2-3kb)	-2025	Tecr	chr8	83596260	83596986	727	RMER12	LTR	ERVK	111
chr17	5316492	5316705	214	5.67	6.18	4.86	1.32	0.00013	0.00163	Up	Intron (ENSMUST00000092723.10/239985, intron 10 of 18)	102062	Ldhal6b	chr17	5316467	5316630	164	B3	SINE	B2	138
chr17	5273673	5273999	327	7.63	7.98	7.16	0.82	0.000799	0.00748	Up	Intron (ENSMUST00000092723.10/239985, intron 6 of 18)	144768	Ldhal6b	.	.	.	.	.	.	.	.
chr17	65730148	65730487	340	6.59	7.11	5.77	1.34	9.7e-05	0.00126	Up	Intron (ENSMUST00000070673.8/106572, intron 1 of 6)	42153	Rab31	.	.	.	.	.	.	.	.
chr17	65746184	65746825	642	7.9	8.28	7.39	0.89	0.00103	0.0092	Up	Intron (ENSMUST00000070673.8/106572, intron 1 of 6)	25815	Rab31	.	.	.	.	.	.	.	.
chr17	65757073	65757466	394	6.94	7.59	5.72	1.87	1.02e-11	4.96e-10	Up	Intron (ENSMUST00000070673.8/106572, intron 1 of 6)	15174	Rab31	chr17	65757437	65757502	66	ID4_	SINE	ID	29
chr17	65737620	65738034	415	9.18	9.55	8.69	0.86	0.00029	0.00321	Up	Intron (ENSMUST00000070673.8/106572, intron 1 of 6)	34606	Rab31	.	.	.	.	.	.	.	.
chr17	65726873	65727275	403	6.72	7.1	6.21	0.89	0.00509	0.0327	Up	Intron (ENSMUST00000070673.8/106572, intron 1 of 6)	45365	Rab31	chr17	65726881	65727005	125	MIR3	SINE	MIR	124
chr17	65750477	65750564	88	4.79	5.46	3.51	1.95	3.53e-05	0.000524	Up	Intron (ENSMUST00000070673.8/106572, intron 1 of 6)	22076	Rab31	chr17	65750430	65750601	172	B3	SINE	B2	87
chr17	65755859	65756060	202	5.27	6.14	2.74	3.4	1.69e-13	1e-11	Up	Intron (ENSMUST00000070673.8/106572, intron 1 of 6)	16580	Rab31	chr17	65755527	65755979	453	ORR1D1	LTR	ERVL-MaLR	120
chr17	65762037	65762209	173	4.54	5.25	3.1	2.16	6e-06	0.00011	Up	Intron (ENSMUST00000070673.8/106572, intron 1 of 6)	10431	Rab31	chr17	65761899	65762141	243	ORR1B2	LTR	ERVL-MaLR	104
chr17	65762037	65762209	173	4.54	5.25	3.1	2.16	6e-06	0.00011	Up	Intron (ENSMUST00000070673.8/106572, intron 1 of 6)	10431	Rab31	chr17	65762143	65762245	103	RSINE1	SINE	B4	66
chr17	65724325	65724618	294	6.79	7.51	5.3	2.21	3.23e-12	1.67e-10	Up	Intron (ENSMUST00000070673.8/106572, intron 1 of 6)	48022	Rab31	chr17	65724459	65724495	37	(CAGGG)n	Simple_repeat	Simple_repeat	36
chr17	65743768	65744367	600	7.86	8.43	6.91	1.52	1.86e-11	8.84e-10	Up	Intron (ENSMUST00000070673.8/106572, intron 1 of 6)	28273	Rab31	chr17	65743729	65744124	396	MTD	LTR	ERVL-MaLR	356
chr17	26232968	26233115	148	5.47	6.08	4.4	1.68	8.78e-06	0.000154	Up	Intron (ENSMUST00000114988.7/106581, intron 1 of 12)	11026	Fam234a	chr17	26232914	26233129	216	B3	SINE	B2	147
chr17	66043828	66043939	112	5.24	5.8	4.31	1.49	0.000424	0.00444	Up	Intron (ENSMUST00000038116.12/106585, intron 3 of 12)	32525	Ankrd12	chr17	66043799	66043973	175	B2_Mm2	SINE	B2	111
chr17	66018390	66018616	227	7.92	8.2	7.58	0.62	0.00659	0.0399	Up	Intron (ENSMUST00000038116.12/106585, intron 8 of 12)	-35436	Ankrd12	chr17	66017034	66019879	2846	MMVL30-int	LTR	ERV1	226
chr17	56708599	56709260	662	9.26	9.87	8.17	1.7	6.42e-13	3.58e-11	Up	Exon (ENSMUST00000002445.9/71810, exon 13 of 16)	7717	Vmac	.	.	.	.	.	.	.	.
chr17	32729196	32729273	78	3.73	4.39	2.49	1.9	0.00323	0.0229	Up	Distal Intergenic	43517	Cyp4f15	chr17	32729152	32729348	197	B3	SINE	B2	77
chr17	80246751	80246938	188	4.65	5.11	3.96	1.15	0.00625	0.0383	Up	Intron (ENSMUST00000038166.8/106794, intron 20 of 22)	20904	Dhx57	chr17	80246899	80247045	147	B1_Mus1	SINE	Alu	39
chr18	50035083	50035321	239	7.13	7.68	6.22	1.46	7.58e-07	1.72e-05	Up	Intron (ENSMUST00000148989.2/106869, intron 1 of 1)	4054	Tnfaip8	.	.	.	.	.	.	.	.
chr18	61775327	61775676	350	5.08	5.53	4.43	1.1	0.00711	0.0423	Up	Intron (ENSMUST00000154876.7/106877, intron 1 of 15)	10935	Afap1l1	chr18	61775198	61775349	152	MTE2b	LTR	ERVL-MaLR	22
chr18	61775327	61775676	350	5.08	5.53	4.43	1.1	0.00711	0.0423	Up	Intron (ENSMUST00000154876.7/106877, intron 1 of 15)	10935	Afap1l1	chr18	61775334	61775915	582	MTE-int	LTR	ERVL-MaLR	342
chr18	60451338	60451427	90	6.98	7.78	5.01	2.77	8.56e-17	6.77e-15	Up	Distal Intergenic	50556	Smim3	chr18	60451202	60451632	431	RLTR10C	LTR	ERVK	89
chr18	24599339	24599622	284	6.29	6.93	5.09	1.84	1.8e-07	4.65e-06	Up	Promoter (<=1kb)	0	Slc39a6	.	.	.	.	.	.	.	.
chr18	45993620	45993788	169	4.43	5.13	3.01	2.12	4.55e-05	0.000655	Up	Distal Intergenic	-97111	A330093E20Rik	chr18	45993519	45993832	314	MTE2b	LTR	ERVL-MaLR	168
chr18	45898389	45898687	299	7.72	8.22	6.96	1.26	5.57e-06	0.000103	Up	Promoter (1-2kb)	-1880	A330093E20Rik	.	.	.	.	.	.	.	.
chr18	45993914	45994257	344	7.11	7.76	5.88	1.88	4.98e-11	2.24e-09	Up	Distal Intergenic	-97405	A330093E20Rik	chr18	45993840	45994002	163	L1MB3	LINE	L1	88
chr18	45993914	45994257	344	7.11	7.76	5.88	1.88	4.98e-11	2.24e-09	Up	Distal Intergenic	-97405	A330093E20Rik	chr18	45994028	45994309	282	L1MB3	LINE	L1	229
chr18	45899007	45899247	241	7.13	7.52	6.6	0.92	0.000247	0.00281	Up	Promoter (2-3kb)	-2498	A330093E20Rik	.	.	.	.	.	.	.	.
chr18	56364172	56364562	391	6.94	7.35	6.38	0.97	0.000682	0.00657	Up	Distal Intergenic	-67570	Gramd3	chr18	56364288	56364678	391	MTC	LTR	ERVL-MaLR	274
chr18	56441327	56441831	505	7.48	7.87	6.95	0.92	0.00183	0.0147	Up	Intron (ENSMUST00000070166.5/107022, intron 1 of 13)	9195	Gramd3	chr18	56441247	56441357	111	B1_Mm	SINE	Alu	30
chr18	56441327	56441831	505	7.48	7.87	6.95	0.92	0.00183	0.0147	Up	Intron (ENSMUST00000070166.5/107022, intron 1 of 13)	9195	Gramd3	chr18	56441438	56441557	120	PB1D9	SINE	Alu	119
chr18	56441327	56441831	505	7.48	7.87	6.95	0.92	0.00183	0.0147	Up	Intron (ENSMUST00000070166.5/107022, intron 1 of 13)	9195	Gramd3	chr18	56441640	56441860	221	MARNA	DNA	TcMar-Mariner	191
chr18	56458815	56459058	244	5.94	6.45	5.15	1.3	0.000621	0.0061	Up	Intron (ENSMUST00000070166.5/107022, intron 1 of 13)	26683	Gramd3	.	.	.	.	.	.	.	.
chr18	62525611	62526072	462	8.13	8.49	7.66	0.83	0.00131	0.0112	Up	Intron (ENSMUST00000048688.6/107035, intron 9 of 21)	22671	Fbxo38	.	.	.	.	.	.	.	.
chr18	62531627	62531894	268	6.98	7.55	6.03	1.52	3.05e-06	5.99e-05	Up	Intron (ENSMUST00000048688.6/107035, intron 5 of 21)	16849	Fbxo38	.	.	.	.	.	.	.	.
chr18	67642403	67642544	142	6.16	6.69	5.31	1.38	9.07e-05	0.00119	Up	Promoter (<=1kb)	804	Psmg2	chr18	67642380	67642535	156	B3A	SINE	B2	132
chr18	35277283	35277384	102	4	4.65	2.78	1.87	0.000627	0.00614	Up	Intron (ENSMUST00000025215.8/81500, intron 7 of 9)	-62259	Lrrtm2	chr18	35277253	35277422	170	B3	SINE	B2	101
chr18	35192241	35192406	166	5.24	5.65	4.67	0.98	0.00588	0.0365	Up	Intron (ENSMUST00000042345.6/12385, intron 7 of 17)	22618	Lrrtm2	.	.	.	.	.	.	.	.
chr19	40119798	40119909	112	10.86	11.14	10.51	0.63	0.00427	0.0285	Up	Distal Intergenic	30063	Cyp2c50	chr19	40114996	40119907	4912	Lx2	LINE	L1	109
chr19	40119798	40119909	112	10.86	11.14	10.51	0.63	0.00427	0.0285	Up	Distal Intergenic	30063	Cyp2c50	chr19	40119907	40119919	13	B4A	SINE	B4	2
chr19	37018504	37018798	295	7.64	8.44	5.69	2.75	9.26e-22	1.09e-19	Up	Downstream (2-3kb)	92425	Btaf1	.	.	.	.	.	.	.	.
chr19	7055316	7055487	172	6.75	7.18	6.13	1.05	0.000345	0.00372	Up	Promoter (1-2kb)	-1281	Macrod1	chr19	7055268	7055467	200	B3	SINE	B2	151
chr19	45112593	45112704	112	4.13	4.91	2.35	2.55	6.32e-05	0.000871	Up	Distal Intergenic	36454	Kazald1	chr19	45112541	45112750	210	B3A	SINE	B2	111
chr19	15364859	15364994	136	7.24	7.96	5.76	2.2	6.47e-14	3.98e-12	Up	Distal Intergenic	544718	Psat1	chr19	15364650	15365074	425	RLTR10C	LTR	ERVK	135
chr19	15596960	15597036	77	6.71	7.47	5	2.47	3.15e-15	2.19e-13	Up	Distal Intergenic	312676	Psat1	chr19	15596866	15597220	355	RLTR10C	LTR	ERVK	76
chr19	46275390	46275538	149	5.31	5.91	4.25	1.66	6.85e-06	0.000123	Up	Intron (ENSMUST00000026254.13/107338, intron 29 of 39)	-4335	Gbf1	chr19	46275353	46275567	215	B3	SINE	B2	148
chr19	46234271	46234799	529	7.49	8.11	6.35	1.76	6.26e-10	2.43e-08	Up	Intron (ENSMUST00000026254.13/107338, intron 3 of 39)	-11289	Gbf1	chr19	46234502	46234726	225	RMER2	LTR	ERV1	224
chr19	46234271	46234799	529	7.49	8.11	6.35	1.76	6.26e-10	2.43e-08	Up	Intron (ENSMUST00000026254.13/107338, intron 3 of 39)	-11289	Gbf1	chr19	46234726	46234829	104	B1_Mus1	SINE	Alu	73
chr19	46282625	46282719	95	4.32	4.83	3.51	1.32	0.00576	0.036	Up	Promoter (<=1kb)	-124	Gbf1	chr19	46282557	46282750	194	B3	SINE	B2	94
chr19	25306256	25306523	268	5.78	6.4	4.67	1.73	1.6e-07	4.2e-06	Up	Intron (ENSMUST00000049400.14/107351, intron 2 of 13)	69281	Kank1	chr19	25306345	25306544	200	B3	SINE	B2	178
chr19	25457495	25457829	335	9.26	10.13	6.8	3.32	1.05e-47	8.94e-45	Up	Distal Intergenic	35256	Kank1	chr19	25457456	25457847	392	RLTR10C	LTR	ERVK	334
chr19	25187754	25188062	309	6.68	7.01	6.25	0.76	0.00583	0.0363	Up	Intron (ENSMUST00000025831.6/76088, intron 43 of 47)	-48913	Kank1	.	.	.	.	.	.	.	.
chr19	25461158	25461428	271	6.31	6.78	5.61	1.18	0.000144	0.00177	Up	Distal Intergenic	38919	Kank1	.	.	.	.	.	.	.	.
chr19	25262124	25262260	137	7.51	8.23	5.98	2.25	1.27e-15	9.07e-14	Up	Intron (ENSMUST00000049400.14/107351, intron 1 of 13)	25149	Kank1	chr19	25262025	25262390	366	RLTR10C	LTR	ERVK	136
chr19	37543540	37543904	365	5.88	6.36	5.16	1.2	8.53e-05	0.00113	Up	Distal Intergenic	-6514	Exoc6	chr19	37543509	37543706	198	B3	SINE	B2	166
chr19	37543540	37543904	365	5.88	6.36	5.16	1.2	8.53e-05	0.00113	Up	Distal Intergenic	-6514	Exoc6	chr19	37543723	37543790	68	G-rich	Low_complexity	Low_complexity	67
chr19	37544061	37544244	184	5.25	5.65	4.68	0.97	0.00761	0.0445	Up	Distal Intergenic	-6174	Exoc6	.	.	.	.	.	.	.	.
chr19	5885965	5886093	129	4.71	5.25	3.86	1.38	0.0011	0.0097	Up	Distal Intergenic	7309	Slc25a45	chr19	5885941	5886134	194	B3	SINE	B2	128
chr17	47384162	47384305	144	4.24	5.11	1.79	3.32	8.24e-08	2.28e-06	Up	Promoter (1-2kb)	-1088	Guca1b	chr17	47384133	47384321	189	B3A	SINE	B2	143
chr7	44792859	44793117	259	5.28	5.89	4.2	1.69	7.86e-06	0.000139	Up	Distal Intergenic	22541	Atf5	chr7	44792724	44793262	539	RMER19B	LTR	ERVK	258
chr13	38002547	38002730	184	5.19	5.93	3.63	2.3	4.16e-07	9.96e-06	Up	Distal Intergenic	-8330	Ssr1	chr13	38002576	38002759	184	B2_Mm2	SINE	B2	154
chr8	94657950	94658269	320	5.58	6.17	4.59	1.58	1.57e-05	0.000257	Up	Intron (ENSMUST00000060389.9/67610, intron 14 of 14)	-8331	Arl2bp	chr8	94657889	94658033	145	B1_Mus1	SINE	Alu	83
chr8	94657950	94658269	320	5.58	6.17	4.59	1.58	1.57e-05	0.000257	Up	Intron (ENSMUST00000060389.9/67610, intron 14 of 14)	-8331	Arl2bp	chr8	94657891	94658062	172	B4	SINE	B4	112
chr8	94657950	94658269	320	5.58	6.17	4.59	1.58	1.57e-05	0.000257	Up	Intron (ENSMUST00000060389.9/67610, intron 14 of 14)	-8331	Arl2bp	chr8	94658119	94658298	180	B3	SINE	B2	150
chr4	19687820	19687983	164	4.79	5.27	4.08	1.19	0.00632	0.0387	Up	5' UTR	-9372	Wwp1	chr4	19687779	19687916	138	L2c	LINE	L2	96
chr2	144348650	144348825	176	5.48	6.28	3.53	2.76	0.000177	0.00211	Up	Distal Intergenic	-16504	Ovol2	chr2	144348646	144348825	180	B3A	SINE	B2	175
chr16	34750328	34750457	130	4.77	5.56	2.86	2.71	4.27e-08	1.24e-06	Up	Intron (ENSMUST00000155268.1/107589, intron 1 of 5)	5118	Mylk	chr16	34750315	34750509	195	B3	SINE	B2	129
chr16	34771846	34771967	122	6.54	7.27	4.96	2.31	5.04e-14	3.13e-12	Up	Intron (ENSMUST00000155268.1/107589, intron 1 of 5)	-12954	Mylk	chr16	34771719	34772085	367	RLTR10C	LTR	ERVK	121
chr1	170155453	170155563	111	4.67	5.46	2.73	2.73	1.27e-07	3.39e-06	Up	Intron (ENSMUST00000111350.9/107652, intron 5 of 9)	6388	Uap1	chr1	170155431	170155610	180	B3	SINE	B2	110
chr4	46544449	46544565	117	4.41	5.01	3.36	1.65	0.000863	0.00797	Up	Promoter (1-2kb)	-1647	Coro2a	chr4	46544426	46544566	141	B3	SINE	B2	116
chr4	46617526	46617972	447	7.75	8.17	7.16	1.01	0.00029	0.00322	Up	Intron (ENSMUST00000084621.11/381605, intron 6 of 12)	-15324	Coro2a	chr4	46617480	46617651	172	B2_Mm2	SINE	B2	125
chr2	112274593	112274676	84	4.49	5.18	3.13	2.05	6.57e-05	0.000901	Up	Intron (ENSMUST00000110991.8/107723, intron 1 of 24)	7774	Slc12a6	chr2	112274529	112274715	187	B2_Mm2	SINE	B2	83
chr2	29597143	29597460	318	8.65	9.46	6.63	2.83	7.92e-26	1.26e-23	Up	Distal Intergenic	-22260	Rapgef1	chr2	29597057	29597478	422	RLTR10C	LTR	ERVK	317
chr2	29631673	29631803	131	5.74	6.15	5.15	1	0.00716	0.0425	Up	Intron (ENSMUST00000095087.10/107746, intron 1 of 25)	11763	Rapgef1	chr2	29631648	29631808	161	L1M4	LINE	L1	130
chr2	29614000	29614330	331	6.25	7.01	4.57	2.44	3.57e-10	1.44e-08	Up	Distal Intergenic	-5390	Rapgef1	chr2	29613831	29614430	600	RMER19A	LTR	ERVK	330
chr2	29619021	29619261	241	6.43	6.82	5.91	0.91	0.000769	0.00725	Up	Promoter (<=1kb)	-459	Rapgef1	.	.	.	.	.	.	.	.
chr6	90529481	90529857	377	6.35	7.13	4.57	2.55	4.79e-13	2.71e-11	Up	Intron (ENSMUST00000127199.1/107747, intron 1 of 2)	-20932	Aldh1l1	chr6	90529440	90529639	200	B3	SINE	B2	158
chr6	90529481	90529857	377	6.35	7.13	4.57	2.55	4.79e-13	2.71e-11	Up	Intron (ENSMUST00000127199.1/107747, intron 1 of 2)	-20932	Aldh1l1	chr6	90529639	90530133	495	RCHARR1	DNA	hAT-Charlie	218
chr6	90476940	90477471	532	7.7	8.05	7.23	0.82	0.00231	0.0176	Up	Distal Intergenic	-8956	Aldh1l1	.	.	.	.	.	.	.	.
chr13	94240195	94240330	136	4.37	4.87	3.59	1.29	0.00588	0.0366	Up	Intron (ENSMUST00000022197.14/107767, intron 2 of 8)	6228	Scamp1	.	.	.	.	.	.	.	.
chr13	94264104	94264275	172	4.85	5.6	3.2	2.4	3.54e-07	8.6e-06	Up	Promoter (<=1kb)	871	Scamp1	.	.	.	.	.	.	.	.
chr13	94298491	94298847	357	6.86	7.28	6.25	1.03	0.00118	0.0103	Up	Exon (ENSMUST00000220853.1/ENSMUST00000220853.1, exon 2 of 3)	-12634	Scamp1	chr13	94298517	94298982	466	MER77B	LTR	ERVL	330
chr13	94312851	94313134	284	7.23	7.85	6.13	1.71	4.25e-11	1.93e-09	Up	Distal Intergenic	-26994	Scamp1	chr13	94312832	94313228	397	RLTR10C	LTR	ERVK	283
chr13	94318347	94318593	247	5.02	5.79	3.23	2.56	7.53e-09	2.5e-07	Up	Distal Intergenic	-32490	Scamp1	chr13	94318230	94318494	265	RMER4B	LTR	ERVK	147
chr13	94318347	94318593	247	5.02	5.79	3.23	2.56	7.53e-09	2.5e-07	Up	Distal Intergenic	-32490	Scamp1	chr13	94318592	94318828	237	RMER4B	LTR	ERVK	1
chr8	70062040	70062597	558	7.77	8.06	7.4	0.66	0.00767	0.0448	Up	Intron (ENSMUST00000011450.7/70616, intron 7 of 13)	-10327	Tm6sf2	chr8	70062351	70062713	363	MTE2a	LTR	ERVL-MaLR	246
chr15	74294217	74294561	345	6.12	6.63	5.33	1.3	0.000355	0.00382	Up	Distal Intergenic	-221634	Adgrb1	.	.	.	.	.	.	.	.
chr15	74367667	74367950	284	7.71	8.24	6.86	1.38	1.5e-09	5.53e-08	Up	Distal Intergenic	-148245	Adgrb1	chr15	74367541	74367892	352	IAPLTR1_Mm	LTR	ERVK	225
chr15	74222456	74222938	483	6.02	6.49	5.34	1.14	0.000939	0.00854	Up	Distal Intergenic	-293257	Adgrb1	.	.	.	.	.	.	.	.
chr15	74360873	74361134	262	7.67	8.1	7.07	1.02	8.5e-06	0.000149	Up	Distal Intergenic	-155061	Adgrb1	chr15	74360731	74361082	352	IAPLTR1_Mm	LTR	ERVK	209
chr15	74360873	74361134	262	7.67	8.1	7.07	1.02	8.5e-06	0.000149	Up	Distal Intergenic	-155061	Adgrb1	chr15	74361086	74367541	6456	IAPEz-int	LTR	ERVK	48
chr15	74588727	74589361	635	7.76	8.25	7.01	1.24	6.02e-08	1.71e-06	Up	Promoter (<=1kb)	803	Adgrb1	chr15	74589351	74589439	89	L3	LINE	CR1	10
chr15	74214577	74215045	469	7.07	7.57	6.3	1.27	0.000113	0.00144	Up	Distal Intergenic	-301150	Adgrb1	chr15	74214866	74215022	157	MIRb	SINE	MIR	156
chr3	157741649	157742313	665	6.83	7.4	5.87	1.53	1.26e-05	0.000212	Up	Distal Intergenic	155399	Cth	chr3	157741494	157742326	833	RLTR13D1	LTR	ERVK	664
chr3	157891947	157892032	86	4.02	4.64	2.92	1.72	0.00329	0.0233	Up	Downstream (2-3kb)	5680	Cth	chr3	157891915	157892098	184	B2_Mm2	SINE	B2	85
chr1	127257088	127257310	223	5.23	5.7	4.55	1.15	0.00228	0.0175	Up	Intron (ENSMUST00000189427.6/107895, intron 1 of 7)	-49452	Mgat5	chr1	127256924	127257354	431	MER77B	LTR	ERVL	222
chr1	127053788	127054012	225	8.12	8.89	6.39	2.49	1.35e-20	1.46e-18	Up	Distal Intergenic	-151003	Mgat5	chr1	127053709	127054130	422	RLTR10C	LTR	ERVK	224
chr1	127238873	127239051	179	6.65	7.28	5.5	1.78	6.81e-11	3.01e-09	Up	Intron (ENSMUST00000189427.6/107895, intron 1 of 7)	33845	Mgat5	chr1	127238842	127238889	48	(TCCA)n	Simple_repeat	Simple_repeat	16
chr1	127238873	127239051	179	6.65	7.28	5.5	1.78	6.81e-11	3.01e-09	Up	Intron (ENSMUST00000189427.6/107895, intron 1 of 7)	33845	Mgat5	chr1	127238889	127239074	186	B3A	SINE	B2	162
chr1	127290723	127291106	384	6.76	7.27	5.98	1.3	7.95e-06	0.000141	Up	Intron (ENSMUST00000189427.6/107895, intron 1 of 7)	-15656	Mgat5	.	.	.	.	.	.	.	.
chr1	127114476	127114575	100	3.73	4.54	1.75	2.79	3.49e-05	0.000519	Up	Distal Intergenic	-90440	Mgat5	chr1	127114488	127114630	143	B3A	SINE	B2	87
chr6	125111058	125111230	173	6.48	6.84	5.98	0.87	0.00259	0.0193	Up	Promoter (2-3kb)	-2311	Chd4	chr6	125111026	125111233	208	B3	SINE	B2	172
chr6	125107861	125107977	117	4.32	4.98	3.09	1.89	0.000143	0.00176	Up	Intron (ENSMUST00000112392.7/107932, intron 15 of 38)	-5564	Chd4	chr6	125107806	125107995	190	B3	SINE	B2	116
chr5	135402288	135402381	94	5.28	5.9	4.2	1.7	5.47e-06	0.000101	Up	Distal Intergenic	-7742	Pom121	chr5	135402256	135402446	191	B2_Mm2	SINE	B2	93
chr19	5277237	5277338	102	5.77	6.4	4.65	1.75	5.26e-07	1.23e-05	Up	Intron (ENSMUST00000025774.9/319322, intron 18 of 20)	-4118	Pacs1	chr19	5277204	5277308	105	B2_Mm2	SINE	B2	71
chr5	31838299	31838715	417	9.45	10.31	6.98	3.33	2.17e-44	1.53e-41	Up	Intron (ENSMUST00000201352.3/107976, intron 6 of 11)	52916	Babam2	chr5	31838328	31838538	211	RLTR10C	LTR	ERVK	210
chr5	31838299	31838715	417	9.45	10.31	6.98	3.33	2.17e-44	1.53e-41	Up	Intron (ENSMUST00000201352.3/107976, intron 6 of 11)	52916	Babam2	chr5	31838538	31838582	45	(GA)n	Simple_repeat	Simple_repeat	44
chr5	31838299	31838715	417	9.45	10.31	6.98	3.33	2.17e-44	1.53e-41	Up	Intron (ENSMUST00000201352.3/107976, intron 6 of 11)	52916	Babam2	chr5	31838582	31838784	203	RLTR10C	LTR	ERVK	133
chr5	31588781	31589065	285	5.09	5.78	3.7	2.08	9.45e-07	2.1e-05	Up	Distal Intergenic	-7873	Babam2	chr5	31588677	31588810	134	B2_Mm1a	SINE	B2	29
chr5	31588781	31589065	285	5.09	5.78	3.7	2.08	9.45e-07	2.1e-05	Up	Distal Intergenic	-7873	Babam2	chr5	31588810	31588989	180	B3	SINE	B2	179
chr5	31926674	31926818	145	5.27	6.07	3.34	2.73	2.55e-09	9.09e-08	Up	Exon (ENSMUST00000202862.1/ENSMUST00000202862.1, exon 1 of 1)	-119160	Babam2	chr5	31926720	31926794	75	Tigger16a	DNA	TcMar-Tigger	74
chr1	189550914	189551123	210	5.22	5.98	3.54	2.44	0.00332	0.0235	Up	Distal Intergenic	97733	Cenpf	chr1	189550898	189551062	165	B3	SINE	B2	148
chr1	189675504	189675601	98	4	4.6	2.97	1.63	0.00391	0.0266	Up	Intron (ENSMUST00000171929.7/108000, intron 7 of 17)	12434	Cenpf	.	.	.	.	.	.	.	.
chr18	26998499	26998693	195	7.6	7.97	7.1	0.87	0.000156	0.0019	Up	Distal Intergenic	-1244342	Celf4	chr18	26998332	26998669	338	IAPLTR1a_Mm	LTR	ERVK	170
chr18	26998499	26998693	195	7.6	7.97	7.1	0.87	0.000156	0.0019	Up	Distal Intergenic	-1244342	Celf4	chr18	26998671	27000000	1330	IAPEz-int	LTR	ERVK	22
chr18	25460739	25460945	207	8.34	9.09	6.67	2.43	1.21e-24	1.78e-22	Up	Intron (ENSMUST00000159605.7/225289, intron 8 of 8)	25952	Celf4	chr18	25460668	25461075	408	RLTR10C	LTR	ERVK	206
chr18	27005288	27005470	183	7.25	7.79	6.4	1.39	5.42e-08	1.55e-06	Up	Distal Intergenic	-1251131	Celf4	chr18	27005119	27005456	338	IAPLTR1a_Mm	LTR	ERVK	168
chr5	115329982	115330093	112	5.25	5.74	4.51	1.23	0.00446	0.0295	Up	Promoter (<=1kb)	-485	Srsf9	chr5	115329844	115330025	182	B3	SINE	B2	43
chr9	55070794	55071256	463	9.25	10.11	6.79	3.32	4.43e-46	3.43e-43	Up	Distal Intergenic	-22015	Chrnb4	chr9	55070772	55071204	433	RLTR10C	LTR	ERVK	410
chr9	55070794	55071256	463	9.25	10.11	6.79	3.32	4.43e-46	3.43e-43	Up	Distal Intergenic	-22015	Chrnb4	chr9	55071204	55076288	5085	MMERVK10C-int	LTR	ERVK	52
chr9	55077299	55077994	696	9.77	10.67	6.94	3.73	9.91e-66	3.88e-62	Up	Distal Intergenic	-28520	Chrnb4	chr9	55077152	55077495	344	MMERVK10C-int	LTR	ERVK	196
chr9	55077299	55077994	696	9.77	10.67	6.94	3.73	9.91e-66	3.88e-62	Up	Distal Intergenic	-28520	Chrnb4	chr9	55077498	55077930	433	RLTR10C	LTR	ERVK	432
chr9	55078081	55078344	264	5.24	6.03	3.34	2.69	2.79e-09	9.86e-08	Up	Distal Intergenic	-29302	Chrnb4	.	.	.	.	.	.	.	.
chr6	117952431	117952602	172	4.97	5.85	2.29	3.56	6.64e-11	2.94e-09	Up	Distal Intergenic	-14739	Fxyd4	chr6	117952451	117952642	192	B3	SINE	B2	151
chr6	117963299	117963496	198	4.87	5.73	2.46	3.27	2.51e-11	1.18e-09	Up	Distal Intergenic	-25607	Fxyd4	chr6	117963270	117963453	184	B3A	SINE	B2	154
chr6	117963299	117963496	198	4.87	5.73	2.46	3.27	2.51e-11	1.18e-09	Up	Distal Intergenic	-25607	Fxyd4	chr6	117963467	117963577	111	MLTR73	LTR	ERV1	29
chr8	27361893	27362556	664	10.15	10.49	9.69	0.81	0.000203	0.00238	Up	Distal Intergenic	-6155	Chrnb3	.	.	.	.	.	.	.	.
chr8	27360688	27360837	150	5.98	6.74	4.28	2.46	2e-10	8.3e-09	Up	Distal Intergenic	-7874	Chrnb3	chr8	27360687	27360794	108	B3	SINE	B2	106
chr8	27360688	27360837	150	5.98	6.74	4.28	2.46	2e-10	8.3e-09	Up	Distal Intergenic	-7874	Chrnb3	chr8	27360793	27360882	90	B3	SINE	B2	44
chr8	27371591	27371810	220	5.41	5.96	4.49	1.48	2.35e-05	0.000367	Up	Intron (ENSMUST00000060943.4/108043, intron 1 of 5)	2809	Chrnb3	.	.	.	.	.	.	.	.
chr7	87894988	87895251	264	5.89	6.31	5.29	1.01	0.00223	0.0172	Up	Intron (ENSMUST00000125009.8/108071, intron 4 of 9)	291899	Grm5	chr7	87893778	87896640	2863	IAP-d-int	LTR	ERVK	263
chr7	87774485	87774696	212	5.82	6.25	5.21	1.05	0.00218	0.0169	Up	Intron (ENSMUST00000208791.1/108071, intron 3 of 3)	171396	Grm5	.	.	.	.	.	.	.	.
chr11	50847190	50847310	121	5.35	5.79	4.7	1.09	0.00825	0.0473	Up	Distal Intergenic	-3375	Grm6	.	.	.	.	.	.	.	.
chr11	50850795	50851597	803	8.41	8.69	8.06	0.63	0.00831	0.0475	Up	Promoter (<=1kb)	0	Grm6	.	.	.	.	.	.	.	.
chr6	110736507	110736761	255	5.92	6.8	3.31	3.48	8.67e-20	8.72e-18	Up	Intron (ENSMUST00000174018.7/108073, intron 2 of 9)	90925	Grm7	chr6	110736570	110736779	210	B3A	SINE	B2	191
chr6	110690853	110691328	476	7.17	7.53	6.68	0.85	0.00173	0.014	Up	Intron (ENSMUST00000174018.7/108073, intron 1 of 9)	45271	Grm7	chr6	110690760	110690950	191	MIRc	SINE	MIR	97
chr6	110690853	110691328	476	7.17	7.53	6.68	0.85	0.00173	0.014	Up	Intron (ENSMUST00000174018.7/108073, intron 1 of 9)	45271	Grm7	chr6	110691212	110691470	259	B4	SINE	B4	116
chr6	111685046	111685149	104	4.37	5.15	2.5	2.65	1.04e-06	2.28e-05	Up	Distal Intergenic	189302	Grm7	chr6	111685003	111685152	150	B3A	SINE	B2	103
chr6	111057960	111058068	109	3.78	4.67	0.89	3.78	1.74e-06	3.62e-05	Up	Intron (ENSMUST00000174018.7/108073, intron 3 of 9)	412378	Grm7	chr6	111057911	111058125	215	B3	SINE	B2	108
chr6	110645320	110646344	1025	7.88	8.39	7.06	1.33	1.29e-05	0.000217	Up	Promoter (<=1kb)	0	Grm7	chr6	110645491	110645538	48	(AGGGGG)n	Simple_repeat	Simple_repeat	47
chr6	110709765	110710572	808	9.09	9.47	8.58	0.89	0.00175	0.0142	Up	Intron (ENSMUST00000174018.7/108073, intron 2 of 9)	64183	Grm7	.	.	.	.	.	.	.	.
chr6	111781650	111782521	872	10.28	10.59	9.87	0.72	0.000781	0.00734	Up	Distal Intergenic	285906	Grm7	chr6	111781617	111781696	80	ID4	SINE	ID	46
chr6	111781650	111782521	872	10.28	10.59	9.87	0.72	0.000781	0.00734	Up	Distal Intergenic	285906	Grm7	chr6	111781921	111782181	261	MTEb	LTR	ERVL-MaLR	260
chr7	27294855	27294989	135	4.38	4.98	3.31	1.67	0.00248	0.0186	Up	Distal Intergenic	11981	Ltbp4	chr7	27294938	27295041	104	L1MC5a	LINE	L1	51
chr7	27325673	27326042	370	6.88	7.24	6.39	0.86	0.00213	0.0166	Up	Exon (ENSMUST00000038618.12/108075, exon 15 of 33)	7562	Ltbp4	.	.	.	.	.	.	.	.
chr7	27290694	27290849	156	5.04	5.81	3.3	2.51	4.51e-08	1.31e-06	Up	Distal Intergenic	16121	Ltbp4	chr7	27290649	27290735	87	B3	SINE	B2	41
chr7	27290694	27290849	156	5.04	5.81	3.3	2.51	4.51e-08	1.31e-06	Up	Distal Intergenic	16121	Ltbp4	chr7	27290815	27290856	42	MT2B	LTR	ERVL	34
chr5	143048360	143048934	575	7.89	8.23	7.44	0.79	0.00162	0.0133	Up	Intron (ENSMUST00000053498.12/108086, intron 13 of 16)	38893	Rnf216	chr5	143048830	143048854	25	(TC)n	Simple_repeat	Simple_repeat	24
chr5	143056523	143056771	249	6.92	7.3	6.39	0.9	0.00387	0.0264	Up	Intron (ENSMUST00000053498.12/108086, intron 13 of 16)	31056	Rnf216	.	.	.	.	.	.	.	.
chr5	143130465	143130654	190	5.87	6.7	3.66	3.04	2.53e-15	1.77e-13	Up	Distal Intergenic	-17471	Rnf216	chr5	143130647	143130788	142	B1_Mm	SINE	Alu	7
chr5	143130465	143130654	190	5.87	6.7	3.66	3.04	2.53e-15	1.77e-13	Up	Distal Intergenic	-17471	Rnf216	chr5	143130474	143130647	174	B3	SINE	B2	173
chr3	97655032	97655152	121	6.14	6.95	4.12	2.83	3.67e-16	2.73e-14	Up	3' UTR	-3041	Prkab2	chr3	97654999	97655056	58	B4	SINE	B4	24
chr3	97655032	97655152	121	6.14	6.95	4.12	2.83	3.67e-16	2.73e-14	Up	3' UTR	-3041	Prkab2	chr3	97655008	97655185	178	B3	SINE	B2	120
chr5	25025688	25026309	622	7.61	7.95	7.16	0.79	0.00887	0.0499	Up	Intron (ENSMUST00000030784.13/108099, intron 2 of 15)	-29935	Prkag2	.	.	.	.	.	.	.	.
chr11	119937419	119937515	97	5.61	6.01	5.05	0.96	0.00496	0.0321	Up	Intron (ENSMUST00000129379.1/ENSMUST00000129379.1, intron 2 of 2)	-5248	Baiap2	.	.	.	.	.	.	.	.
chr11	119930339	119930519	181	6.28	7.02	4.7	2.32	6.95e-12	3.46e-10	Up	Distal Intergenic	-12244	Baiap2	chr11	119930058	119930754	697	ORR1D1-int	LTR	ERVL-MaLR	180
chr11	119931874	119932595	722	8.42	8.7	8.08	0.62	0.00752	0.0441	Up	Distal Intergenic	-10168	Baiap2	chr11	119931818	119932007	190	L1MEg1	LINE	L1	133
chr11	119931874	119932595	722	8.42	8.7	8.08	0.62	0.00752	0.0441	Up	Distal Intergenic	-10168	Baiap2	chr11	119932085	119932207	123	PB1D9	SINE	Alu	122
chr11	119979580	119979867	288	6.8	7.19	6.26	0.93	0.00155	0.0128	Up	Intron (ENSMUST00000075180.11/108100, intron 3 of 13)	-17804	Baiap2	.	.	.	.	.	.	.	.
chr11	119929872	119930222	351	6.83	7.6	5.07	2.54	9.26e-15	6.16e-13	Up	Distal Intergenic	-12541	Baiap2	chr11	119929742	119929976	235	ORR1D1-int	LTR	ERVL-MaLR	104
chr11	119929872	119930222	351	6.83	7.6	5.07	2.54	9.26e-15	6.16e-13	Up	Distal Intergenic	-12541	Baiap2	chr11	119929903	119930044	142	B1_Mur2	SINE	Alu	141
chr11	119929872	119930222	351	6.83	7.6	5.07	2.54	9.26e-15	6.16e-13	Up	Distal Intergenic	-12541	Baiap2	chr11	119930058	119930754	697	ORR1D1-int	LTR	ERVL-MaLR	164
chr16	19766207	19766340	134	4.73	5.48	3.1	2.38	2.16e-07	5.49e-06	Up	Intron (ENSMUST00000121344.7/108105, intron 4 of 4)	5153	B3gnt5	chr16	19766215	19766382	168	B3	SINE	B2	125
chr7	74703641	74703751	111	4.87	5.78	1.83	3.96	1.12e-12	6.07e-11	Up	Distal Intergenic	-148861	Slco3a1	chr7	74703599	74703789	191	B2_Mm2	SINE	B2	110
chr7	74391300	74391957	658	8.24	8.59	7.79	0.8	0.00121	0.0105	Up	Intron (ENSMUST00000098371.8/108116, intron 2 of 10)	-44069	Slco3a1	.	.	.	.	.	.	.	.
chr7	74524603	74525050	448	7.52	7.96	6.87	1.09	0.000297	0.00328	Up	Intron (ENSMUST00000098371.8/108116, intron 1 of 10)	5059	Slco3a1	chr7	74524954	74525162	209	L2a	LINE	L2	96
chr17	31663008	31663088	81	5.31	5.93	4.2	1.73	2.33e-06	4.72e-05	Up	Distal Intergenic	-4254	U2af1	chr17	31663015	31663137	123	B3	SINE	B2	73
chr13	90037529	90037837	309	8.89	9.73	6.64	3.09	3.56e-33	1.04e-30	Up	Intron (ENSMUST00000159199.7/108138, intron 3 of 8)	51245	Xrcc4	chr13	90037407	90037608	202	RLTR10C	LTR	ERVK	79
chr13	90037529	90037837	309	8.89	9.73	6.64	3.09	3.56e-33	1.04e-30	Up	Intron (ENSMUST00000159199.7/108138, intron 3 of 8)	51245	Xrcc4	chr13	90037608	90037650	43	(TC)n	Simple_repeat	Simple_repeat	42
chr13	90037529	90037837	309	8.89	9.73	6.64	3.09	3.56e-33	1.04e-30	Up	Intron (ENSMUST00000159199.7/108138, intron 3 of 8)	51245	Xrcc4	chr13	90037650	90037860	211	RLTR10C	LTR	ERVK	187
chr8	124278547	124278849	303	7.15	7.52	6.65	0.87	0.00034	0.00368	Up	Intron (ENSMUST00000127664.1/108148, intron 1 of 15)	-16254	Galnt2	.	.	.	.	.	.	.	.
chr8	124176867	124177020	154	5.89	6.34	5.22	1.12	0.00161	0.0132	Up	Intron (ENSMUST00000127664.1/108148, intron 1 of 15)	-54371	Galnt2	chr8	124176728	124176940	213	L2c	LINE	L2	73
chr8	124206337	124206751	415	7.84	8.61	6.07	2.54	3.94e-18	3.51e-16	Up	Intron (ENSMUST00000127664.1/108148, intron 1 of 15)	-24640	Galnt2	chr8	124206238	124206669	432	RLTR10C	LTR	ERVK	332
chr8	124177288	124177747	460	8.9	9.69	7.07	2.62	9.4e-17	7.4e-15	Up	Intron (ENSMUST00000127664.1/108148, intron 1 of 15)	-53644	Galnt2	chr8	124177161	124177306	146	MTEa	LTR	ERVL-MaLR	18
chr8	124177288	124177747	460	8.9	9.69	7.07	2.62	9.4e-17	7.4e-15	Up	Intron (ENSMUST00000127664.1/108148, intron 1 of 15)	-53644	Galnt2	chr8	124177299	124177338	40	MTEa	LTR	ERVL-MaLR	39
chr8	124177288	124177747	460	8.9	9.69	7.07	2.62	9.4e-17	7.4e-15	Up	Intron (ENSMUST00000127664.1/108148, intron 1 of 15)	-53644	Galnt2	chr8	124177322	124177402	81	MTE2a	LTR	ERVL-MaLR	80
chr8	124177288	124177747	460	8.9	9.69	7.07	2.62	9.4e-17	7.4e-15	Up	Intron (ENSMUST00000127664.1/108148, intron 1 of 15)	-53644	Galnt2	chr8	124177377	124177434	58	MTEa	LTR	ERVL-MaLR	57
chr8	124177288	124177747	460	8.9	9.69	7.07	2.62	9.4e-17	7.4e-15	Up	Intron (ENSMUST00000127664.1/108148, intron 1 of 15)	-53644	Galnt2	chr8	124177442	124177498	57	MTE2a	LTR	ERVL-MaLR	56
chr8	124177288	124177747	460	8.9	9.69	7.07	2.62	9.4e-17	7.4e-15	Up	Intron (ENSMUST00000127664.1/108148, intron 1 of 15)	-53644	Galnt2	chr8	124177473	124177530	58	MTE2a	LTR	ERVL-MaLR	57
chr8	124177288	124177747	460	8.9	9.69	7.07	2.62	9.4e-17	7.4e-15	Up	Intron (ENSMUST00000127664.1/108148, intron 1 of 15)	-53644	Galnt2	chr8	124177538	124177594	57	MTE2a	LTR	ERVL-MaLR	56
chr8	124177288	124177747	460	8.9	9.69	7.07	2.62	9.4e-17	7.4e-15	Up	Intron (ENSMUST00000127664.1/108148, intron 1 of 15)	-53644	Galnt2	chr8	124177569	124177626	58	MTE2a	LTR	ERVL-MaLR	57
chr8	124177288	124177747	460	8.9	9.69	7.07	2.62	9.4e-17	7.4e-15	Up	Intron (ENSMUST00000127664.1/108148, intron 1 of 15)	-53644	Galnt2	chr8	124177619	124177658	40	MTE2a	LTR	ERVL-MaLR	39
chr8	124177288	124177747	460	8.9	9.69	7.07	2.62	9.4e-17	7.4e-15	Up	Intron (ENSMUST00000127664.1/108148, intron 1 of 15)	-53644	Galnt2	chr8	124177651	124177690	40	MTE2a	LTR	ERVL-MaLR	39
chr8	124177288	124177747	460	8.9	9.69	7.07	2.62	9.4e-17	7.4e-15	Up	Intron (ENSMUST00000127664.1/108148, intron 1 of 15)	-53644	Galnt2	chr8	124177683	124177722	40	MTE2a	LTR	ERVL-MaLR	39
chr8	124177288	124177747	460	8.9	9.69	7.07	2.62	9.4e-17	7.4e-15	Up	Intron (ENSMUST00000127664.1/108148, intron 1 of 15)	-53644	Galnt2	chr8	124177715	124177754	40	MTE2a	LTR	ERVL-MaLR	32
chr8	124177288	124177747	460	8.9	9.69	7.07	2.62	9.4e-17	7.4e-15	Up	Intron (ENSMUST00000127664.1/108148, intron 1 of 15)	-53644	Galnt2	chr8	124177730	124177871	142	MTEa	LTR	ERVL-MaLR	17
chr12	76266946	76267139	194	6.65	7.11	5.97	1.14	0.000107	0.00138	Up	Intron (ENSMUST00000021443.6/108156, intron 1 of 27)	11466	Mthfd1	chr12	76266865	76266967	103	B1_Mur2	SINE	Alu	21
chr8	33637839	33637967	129	5.84	6.71	3.27	3.44	5.43e-20	5.56e-18	Up	Promoter (1-2kb)	-1585	Ubxn8	chr8	33637812	33637998	187	B3	SINE	B2	128
chr13	34741234	34741535	302	5.74	6.53	3.82	2.72	1.64e-13	9.76e-12	Up	Promoter (1-2kb)	1622	Fam50b	chr13	34741218	34741353	136	B1_Mus1	SINE	Alu	119
chr13	34741234	34741535	302	5.74	6.53	3.82	2.72	1.64e-13	9.76e-12	Up	Promoter (1-2kb)	1622	Fam50b	chr13	34741379	34741567	189	B3	SINE	B2	156
chr13	34733877	34734009	133	4.66	5.15	3.92	1.23	0.00502	0.0324	Up	Promoter (<=1kb)	-841	Fam50b	.	.	.	.	.	.	.	.
chr13	34711445	34711720	276	6.34	6.97	5.19	1.79	1.49e-08	4.69e-07	Up	Exon (ENSMUST00000222361.1/ENSMUST00000222361.1, exon 1 of 3)	-23130	Fam50b	chr13	34711324	34711500	177	B3A	SINE	B2	55
chr13	34727208	34727331	124	5.04	5.82	3.24	2.57	1.77e-09	6.46e-08	Up	Intron (ENSMUST00000222865.1/ENSMUST00000222865.1, intron 2 of 2)	-7519	Fam50b	chr13	34727151	34727322	172	B3A	SINE	B2	114
chr8	93718331	93718425	95	4.21	4.99	2.42	2.57	1.6e-05	0.000261	Up	Promoter (1-2kb)	1550	Gm30606	chr8	93718264	93718452	189	B2_Mm2	SINE	B2	94
chr11	21107978	21108445	468	7.41	8.02	6.32	1.7	2.18e-10	8.99e-09	Up	Intron (ENSMUST00000156122.7/67245, intron 1 of 3)	8444	2610024D14Rik	chr11	21107948	21108442	495	Lx8	LINE	L1	464
chr17	52489950	52490117	168	6.99	7.46	6.28	1.18	2.14e-05	0.000338	Up	Distal Intergenic	112543	Gm27217	chr17	52489950	52490442	493	IAPLTR2_Mm	LTR	ERVK	167
chr18	90585547	90586084	538	6.88	7.37	6.16	1.21	6.37e-05	0.000877	Up	Promoter (<=1kb)	140	Gm45871	chr18	90585991	90586762	772	MTD-int	LTR	ERVL-MaLR	93
chr11	40677312	40677456	145	4.78	5.4	3.69	1.7	9.09e-05	0.00119	Up	Downstream (1-2kb)	7771	Mat2b	chr11	40677326	40677417	92	B3A	SINE	B2	91
chr13	38958008	38958307	300	6.14	6.6	5.47	1.14	6.2e-05	0.000857	Up	Promoter (2-3kb)	2173	Slc35b3	.	.	.	.	.	.	.	.
chr13	39623551	39623846	296	8.63	9.49	6.16	3.33	4.86e-40	2.58e-37	Up	Intron (ENSMUST00000225217.1/ENSMUST00000225217.1, intron 1 of 3)	-662676	Slc35b3	chr13	39623481	39623911	431	RLTR10C	LTR	ERVK	295
chr13	38914978	38915109	132	4.3	4.91	3.23	1.68	0.000987	0.00891	Up	Distal Intergenic	28043	Slc35b3	chr13	38915045	38915179	135	MER5A	DNA	hAT-Charlie	64
chr6	122463179	122463318	140	5.25	5.78	4.42	1.35	0.000232	0.00266	Up	Intron (ENSMUST00000146274.7/108653, intron 2 of 7)	3217	Rimklb	chr6	122463181	122463321	141	B3	SINE	B2	137
chr18	68286624	68286923	300	5.71	6.11	5.17	0.93	0.0035	0.0245	Up	Intron (ENSMUST00000042852.6/108654, intron 1 of 3)	13279	Fam210a	chr18	68286628	68286723	96	B3	SINE	B2	95
chr18	68286624	68286923	300	5.71	6.11	5.17	0.93	0.0035	0.0245	Up	Intron (ENSMUST00000042852.6/108654, intron 1 of 3)	13279	Fam210a	chr18	68286723	68287205	483	RLTR19	LTR	ERVK	200
chr6	98977903	98978244	342	5.6	6.02	5.01	1.01	0.00326	0.0231	Up	Exon (ENSMUST00000113326.8/108655, exon 9 of 18)	25436	Foxp1	.	.	.	.	.	.	.	.
chr6	99008726	99008826	101	4.4	5.14	2.77	2.38	2.21e-06	4.5e-05	Up	Intron (ENSMUST00000113326.8/108655, intron 7 of 17)	-5046	Foxp1	chr6	99008687	99008866	180	B3	SINE	B2	100
chr6	99643920	99644034	115	4.25	4.88	3.1	1.79	0.00029	0.00322	Up	Intron (ENSMUST00000155466.1/66892, intron 2 of 5)	-11544	Foxp1	.	.	.	.	.	.	.	.
chr6	99527585	99527744	160	5.57	6.46	2.8	3.66	2.67e-16	2.01e-14	Up	Intron (ENSMUST00000155466.1/66892, intron 3 of 5)	-4864	Foxp1	chr6	99527573	99527758	186	B3A	SINE	B2	159
chr1	5232182	5232430	249	6.77	7.09	6.36	0.73	0.00709	0.0422	Up	Distal Intergenic	149018	Atp6v1h	.	.	.	.	.	.	.	.
chr1	5228696	5229232	537	8.3	8.64	7.85	0.79	0.00425	0.0284	Up	Distal Intergenic	145532	Atp6v1h	.	.	.	.	.	.	.	.
chr1	5299071	5299310	240	8.09	8.84	6.43	2.41	1.35e-23	1.82e-21	Up	Distal Intergenic	215907	Atp6v1h	chr1	5299039	5299460	422	RLTR10C	LTR	ERVK	239
chr14	77890055	77890226	172	5.14	5.93	3.25	2.68	2.65e-09	9.44e-08	Up	Distal Intergenic	-14013	Epsti1	.	.	.	.	.	.	.	.
chr1	90448242	90448573	332	7.94	8.28	7.49	0.79	0.00511	0.0328	Up	Distal Intergenic	-154408	Cops8	chr1	90448107	90448688	582	(CAGA)n	Simple_repeat	Simple_repeat	331
chr1	90486250	90486748	499	6.39	6.92	5.54	1.38	5.02e-06	9.35e-05	Up	Distal Intergenic	-116233	Cops8	.	.	.	.	.	.	.	.
chr1	90447422	90447644	223	7.19	7.57	6.68	0.9	0.000937	0.00852	Up	Distal Intergenic	-155337	Cops8	chr1	90447340	90447985	646	(CAGA)n	Simple_repeat	Simple_repeat	222
chr19	47489351	47489519	169	5.73	6.64	2.82	3.82	1.04e-19	1.04e-17	Up	Distal Intergenic	19254	Stn1	chr19	47489350	47489494	145	B3	SINE	B2	143
chr19	47489351	47489519	169	5.73	6.64	2.82	3.82	1.04e-19	1.04e-17	Up	Distal Intergenic	19254	Stn1	chr19	47489501	47489672	172	RCHARR1	DNA	hAT-Charlie	18
chr2	73747412	73747563	152	4.43	5.09	3.19	1.9	0.000478	0.0049	Up	Intron (ENSMUST00000112024.9/108699, intron 1 of 12)	21290	Chn1	.	.	.	.	.	.	.	.
chr10	77493038	77493151	114	4.32	4.86	3.45	1.41	0.00292	0.0212	Up	Intron (ENSMUST00000180790.1/ENSMUST00000180790.1, intron 1 of 2)	14164	Fam207a	chr10	77493023	77493219	197	B3A	SINE	B2	113
chr10	77492168	77492560	393	8.22	9	6.43	2.57	9.97e-22	1.17e-19	Up	Intron (ENSMUST00000180790.1/ENSMUST00000180790.1, intron 1 of 2)	14755	Fam207a	chr10	77492108	77492605	498	RLTR10C	LTR	ERVK	392
chr5	141067696	141067836	141	4.22	5.15	0.84	4.31	3.88e-09	1.35e-07	Up	Distal Intergenic	-67114	Card11	chr5	141067668	141067857	190	B3	SINE	B2	140
chr5	141084450	141084692	243	5.25	5.8	4.35	1.45	0.000124	0.00156	Up	Distal Intergenic	-83868	Card11	chr5	141084227	141084563	337	ORR1E	LTR	ERVL-MaLR	113
chr5	140948164	140948305	142	4.32	4.99	3.04	1.95	0.000142	0.00175	Up	Intron (ENSMUST00000085786.6/108723, intron 1 of 24)	52166	Card11	.	.	.	.	.	.	.	.
chr5	140890157	140890550	394	6.97	7.63	5.7	1.93	2.47e-10	1.02e-08	Up	Intron (ENSMUST00000085786.6/108723, intron 12 of 24)	-7952	Card11	.	.	.	.	.	.	.	.
chr5	140889628	140889813	186	5.6	6.08	4.87	1.21	0.000559	0.00558	Up	Intron (ENSMUST00000085786.6/108723, intron 13 of 24)	-7423	Card11	.	.	.	.	.	.	.	.
chr5	140887934	140888212	279	6.42	6.87	5.74	1.13	0.0015	0.0124	Up	Intron (ENSMUST00000085786.6/108723, intron 14 of 24)	-5729	Card11	.	.	.	.	.	.	.	.
chr5	140955816	140956030	215	5.72	6.22	4.94	1.28	0.000718	0.00686	Up	Intron (ENSMUST00000085786.6/108723, intron 1 of 24)	44441	Card11	chr5	140955749	140955931	183	MTEa	LTR	ERVL-MaLR	115
chr5	140955816	140956030	215	5.72	6.22	4.94	1.28	0.000718	0.00686	Up	Intron (ENSMUST00000085786.6/108723, intron 1 of 24)	44441	Card11	chr5	140955931	140955952	22	(GA)n	Simple_repeat	Simple_repeat	21
chr5	140955816	140956030	215	5.72	6.22	4.94	1.28	0.000718	0.00686	Up	Intron (ENSMUST00000085786.6/108723, intron 1 of 24)	44441	Card11	chr5	140955952	140956104	153	MTEa	LTR	ERVL-MaLR	78
chr5	140957197	140957391	195	5.54	6.38	3.3	3.08	3.07e-14	1.94e-12	Up	Intron (ENSMUST00000085786.6/108723, intron 1 of 24)	43080	Card11	chr5	140957195	140957383	189	B3	SINE	B2	186
chr5	140940344	140940665	322	5.67	6.12	5.03	1.09	0.00231	0.0176	Up	Intron (ENSMUST00000085786.6/108723, intron 1 of 24)	-58139	Card11	.	.	.	.	.	.	.	.
chr5	140963064	140963260	197	5.05	5.6	4.15	1.45	0.000281	0.00313	Up	Intron (ENSMUST00000085786.6/108723, intron 1 of 24)	37211	Card11	.	.	.	.	.	.	.	.
chr5	140885098	140885235	138	4.81	5.42	3.74	1.68	0.000121	0.00153	Up	Intron (ENSMUST00000085786.6/108723, intron 17 of 24)	-2893	Card11	.	.	.	.	.	.	.	.
chr9	119265776	119266237	462	10.52	11.12	9.47	1.65	1.13e-09	4.22e-08	Up	Promoter (1-2kb)	-1004	Oxsr1	chr9	119265719	119265798	80	ID4_	SINE	ID	22
chr9	119265776	119266237	462	10.52	11.12	9.47	1.65	1.13e-09	4.22e-08	Up	Promoter (1-2kb)	-1004	Oxsr1	chr9	119266204	119266331	128	B1_Mus2	SINE	Alu	33
chr9	119265776	119266237	462	10.52	11.12	9.47	1.65	1.13e-09	4.22e-08	Up	Promoter (1-2kb)	-1004	Oxsr1	chr9	119266223	119266346	124	B4A	SINE	B4	14
chr9	119313554	119313796	243	5.57	6.03	4.89	1.14	0.0011	0.00974	Up	Intron (ENSMUST00000170400.8/382113, intron 1 of 10)	8526	Oxsr1	chr9	119313587	119313819	233	ORR1D1	LTR	ERVL-MaLR	209
chr4	32785685	32785945	261	7.38	8.18	5.47	2.7	1.62e-25	2.52e-23	Up	Distal Intergenic	-14308	Lyrm2	chr4	32785600	32786032	433	RLTR10C	LTR	ERVK	260
chr12	80609282	80609414	133	5.16	5.83	3.86	1.97	7.53e-07	1.71e-05	Up	Intron (ENSMUST00000219267.1/108760, intron 3 of 3)	11179	Galnt16	chr12	80609253	80609505	253	B3	SINE	B2	132
chr7	82880750	82880971	222	5.77	6.53	4.07	2.46	1.05e-10	4.52e-09	Up	Distal Intergenic	13417	Mex3b	chr7	82880790	82880985	196	B3	SINE	B2	181
chr12	91748239	91748704	466	7.96	8.29	7.55	0.74	0.00322	0.0229	Up	Promoter (2-3kb)	-2155	Ston2	.	.	.	.	.	.	.	.
chr10	67119396	67119511	116	5.1	5.57	4.41	1.15	0.00322	0.0229	Up	Intron (ENSMUST00000174062.7/108829, intron 1 of 2)	-7747	Jmjd1c	.	.	.	.	.	.	.	.
chr10	67247186	67247517	332	7.08	7.41	6.66	0.74	0.00413	0.0278	Up	Intron (ENSMUST00000174408.7/108829, intron 22 of 25)	8264	Jmjd1c	chr10	67247311	67247386	76	B3	SINE	B2	75
chr10	67247186	67247517	332	7.08	7.41	6.66	0.74	0.00413	0.0278	Up	Intron (ENSMUST00000174408.7/108829, intron 22 of 25)	8264	Jmjd1c	chr10	67247437	67247578	142	B2_Mm2	SINE	B2	80
chr10	67071430	67071728	299	6.51	6.91	5.97	0.94	0.00124	0.0107	Up	Intron (ENSMUST00000020023.8/28193, intron 1 of 7)	-24397	Jmjd1c	chr10	67071311	67071493	183	ID_B1	SINE	B4	63
chr10	67071430	67071728	299	6.51	6.91	5.97	0.94	0.00124	0.0107	Up	Intron (ENSMUST00000020023.8/28193, intron 1 of 7)	-24397	Jmjd1c	chr10	67071647	67071682	36	(CA)n	Simple_repeat	Simple_repeat	35
chr10	67114362	67114632	271	6.44	7.23	4.54	2.7	7.14e-14	4.38e-12	Up	Intron (ENSMUST00000174062.7/108829, intron 1 of 2)	-12626	Jmjd1c	chr10	67114299	67114480	182	B3	SINE	B2	118
chr10	67114362	67114632	271	6.44	7.23	4.54	2.7	7.14e-14	4.38e-12	Up	Intron (ENSMUST00000174062.7/108829, intron 1 of 2)	-12626	Jmjd1c	chr10	67114547	67114687	141	B1_Mur4	SINE	Alu	85
chr10	67192515	67192662	148	5.25	6.04	3.42	2.62	5.32e-11	2.39e-09	Up	Intron (ENSMUST00000174317.7/108829, intron 3 of 9)	6762	Jmjd1c	chr10	67192490	67192707	218	B3	SINE	B2	147
chr9	85581168	85581568	401	5.95	6.46	5.16	1.3	0.000411	0.00432	Up	Distal Intergenic	136970	Ibtk	.	.	.	.	.	.	.	.
chr9	85684915	85685268	354	6.5	7.4	3.69	3.71	1.42e-26	2.4e-24	Up	Downstream (2-3kb)	33270	Ibtk	chr9	85684382	85684989	608	Lx8b	LINE	L1	74
chr9	85684915	85685268	354	6.5	7.4	3.69	3.71	1.42e-26	2.4e-24	Up	Downstream (2-3kb)	33270	Ibtk	chr9	85685140	85685268	129	B3	SINE	B2	128
chr7	4431696	4431867	172	6.21	6.53	5.78	0.75	0.00727	0.0429	Up	Intron (ENSMUST00000119485.7/108841, intron 3 of 6)	13314	Rdh13	chr7	4431680	4431896	217	B3	SINE	B2	171
chr18	36548511	36548693	183	5.36	5.91	4.45	1.46	0.000834	0.00774	Up	Distal Intergenic	-11294	Ankhd1	chr18	36548352	36548514	163	B2_Mm1t	SINE	B2	3
chr18	36548511	36548693	183	5.36	5.91	4.45	1.46	0.000834	0.00774	Up	Distal Intergenic	-11294	Ankhd1	chr18	36548525	36548632	108	MTD	LTR	ERVL-MaLR	107
chr18	36548511	36548693	183	5.36	5.91	4.45	1.46	0.000834	0.00774	Up	Distal Intergenic	-11294	Ankhd1	chr18	36548685	36548777	93	MTD	LTR	ERVL-MaLR	8
chr18	36656697	36656983	287	6.33	6.99	5.05	1.95	0.00217	0.0169	Up	Promoter (1-2kb)	1187	Ankhd1	.	.	.	.	.	.	.	.
chr18	36657536	36657622	87	5.56	6.15	4.55	1.6	9e-06	0.000157	Up	Promoter (2-3kb)	2026	Ankhd1	chr18	36657489	36657629	141	B2_Mm2	SINE	B2	86
chr1	131547333	131547541	209	5.44	5.97	4.6	1.38	0.000256	0.0029	Up	Distal Intergenic	19430	Fam72a	chr1	131547316	131547340	25	(CCCCCA)n	Simple_repeat	Simple_repeat	7
chr1	131547333	131547541	209	5.44	5.97	4.6	1.38	0.000256	0.0029	Up	Distal Intergenic	19430	Fam72a	chr1	131547373	131547720	348	MLT1B	LTR	ERVL-MaLR	168
chr11	121457979	121458102	124	4.1	4.81	2.62	2.19	9.29e-05	0.00122	Up	Intron (ENSMUST00000103013.9/108903, intron 2 of 38)	6030	Tbcd	chr11	121457953	121458159	207	B3	SINE	B2	123
chr11	121614404	121614482	79	3.11	4.03	-0.14	4.16	7.79e-05	0.00104	Up	Intron (ENSMUST00000103013.9/108903, intron 38 of 38)	12699	Tbcd	.	.	.	.	.	.	.	.
chr3	53233404	53233860	457	8.95	9.79	6.74	3.04	1.44e-45	1.07e-42	Up	Intron (ENSMUST00000059562.13/108927, intron 3 of 3)	191821	Lhfp	.	.	.	.	.	.	.	.
chr3	53118797	53119028	232	5.19	5.63	4.55	1.08	0.00595	0.0369	Up	Intron (ENSMUST00000059562.13/108927, intron 2 of 3)	77214	Lhfp	chr3	53118577	53118898	322	RLTRETN_Mm	LTR	ERVK	101
chr3	53151643	53151949	307	6.2	6.92	4.71	2.21	4.27e-10	1.7e-08	Up	Intron (ENSMUST00000059562.13/108927, intron 2 of 3)	110060	Lhfp	chr3	53151637	53151770	134	MTEb	LTR	ERVL-MaLR	127
chr3	53151643	53151949	307	6.2	6.92	4.71	2.21	4.27e-10	1.7e-08	Up	Intron (ENSMUST00000059562.13/108927, intron 2 of 3)	110060	Lhfp	chr3	53151896	53152125	230	MTEb	LTR	ERVL-MaLR	53
chr3	53112205	53112348	144	4.25	4.94	2.88	2.07	0.000237	0.00271	Up	Exon (ENSMUST00000198488.1/ENSMUST00000198488.1, exon 1 of 1)	70622	Lhfp	chr3	53112156	53112368	213	B3	SINE	B2	143
chr3	53240139	53240448	310	5.81	6.51	4.42	2.09	9.97e-09	3.23e-07	Up	Intron (ENSMUST00000059562.13/108927, intron 3 of 3)	198556	Lhfp	chr3	53240222	53240387	166	B3A	SINE	B2	165
chr3	53234855	53234944	90	4.21	5.15	0.54	4.61	5.29e-09	1.8e-07	Up	Intron (ENSMUST00000059562.13/108927, intron 3 of 3)	193272	Lhfp	chr3	53234836	53235010	175	B3	SINE	B2	89
chr3	53151139	53151387	249	6.6	7.15	5.7	1.45	2.72e-06	5.42e-05	Up	Intron (ENSMUST00000059562.13/108927, intron 2 of 3)	109556	Lhfp	.	.	.	.	.	.	.	.
chr3	53067383	53067500	118	3.72	4.48	2.02	2.46	0.000406	0.00427	Up	Intron (ENSMUST00000059562.13/108927, intron 2 of 3)	25800	Lhfp	chr3	53067318	53067524	207	B3	SINE	B2	117
chr7	99947387	99947600	214	5.01	5.63	3.92	1.71	1.14e-05	0.000193	Up	Intron (ENSMUST00000080817.5/108937, intron 2 of 5)	18134	Rnf169	.	.	.	.	.	.	.	.
chr7	99945988	99946190	203	4.94	5.53	3.94	1.59	0.000675	0.00652	Up	Intron (ENSMUST00000080817.5/108937, intron 2 of 5)	19544	Rnf169	chr7	99946002	99946111	110	RSINE1	SINE	B4	109
chr7	99945988	99946190	203	4.94	5.53	3.94	1.59	0.000675	0.00652	Up	Intron (ENSMUST00000080817.5/108937, intron 2 of 5)	19544	Rnf169	chr7	99946170	99946270	101	PB1D10	SINE	Alu	20
chr3	152402362	152402701	340	7.5	7.9	6.93	0.97	4.74e-05	0.000679	Up	Intron (ENSMUST00000106103.7/108946, intron 1 of 12)	5668	Zzz3	chr3	152402504	152402568	65	L1M5	LINE	L1	64
chr10	72056848	72056993	146	5.14	5.77	3.99	1.77	1.71e-05	0.000278	Up	Intron (ENSMUST00000219284.1/ENSMUST00000219284.1, intron 2 of 5)	-76214	1700049L16Rik	chr10	72056850	72057056	207	B3	SINE	B2	143
chr10	72058713	72058863	151	4.62	5.21	3.61	1.61	0.000506	0.00513	Up	Intron (ENSMUST00000219284.1/ENSMUST00000219284.1, intron 2 of 5)	-78079	1700049L16Rik	chr10	72058661	72058752	92	Lx5c	LINE	L1	39
chr10	72058713	72058863	151	4.62	5.21	3.61	1.61	0.000506	0.00513	Up	Intron (ENSMUST00000219284.1/ENSMUST00000219284.1, intron 2 of 5)	-78079	1700049L16Rik	chr10	72058830	72058981	152	B2_Mm2	SINE	B2	33
chr1	133118245	133118538	294	6.7	7.32	5.59	1.72	6.29e-08	1.77e-06	Up	Distal Intergenic	-12605	Ppp1r15b	chr1	133118163	133118498	336	ORR1B1	LTR	ERVL-MaLR	253
chr1	133125775	133125876	102	5.1	5.73	3.96	1.77	1.59e-05	0.00026	Up	Distal Intergenic	-5267	Ppp1r15b	chr1	133125715	133125914	200	B3	SINE	B2	101
chr15	77544843	77545536	694	6.9	7.52	5.81	1.71	5.12e-08	1.47e-06	Up	Distal Intergenic	-11527	Apol7c	chr15	77544227	77545007	781	RMER17A	LTR	ERVK	164
chr15	77544843	77545536	694	6.9	7.52	5.81	1.71	5.12e-08	1.47e-06	Up	Distal Intergenic	-11527	Apol7c	chr15	77545007	77545079	73	B2_Mm2	SINE	B2	72
chr15	77544843	77545536	694	6.9	7.52	5.81	1.71	5.12e-08	1.47e-06	Up	Distal Intergenic	-11527	Apol7c	chr15	77545501	77545958	458	RMER13A1	LTR	ERVK	35
chr6	113661912	113662183	272	6.94	7.27	6.51	0.76	0.00544	0.0344	Up	Intron (ENSMUST00000059286.13/108960, intron 2 of 12)	-6667	Irak2	chr6	113661902	113661941	40	(GA)n	Simple_repeat	Simple_repeat	29
chr6	113663028	113663362	335	6.46	7.2	4.87	2.33	7.73e-13	4.28e-11	Up	Intron (ENSMUST00000059286.13/108960, intron 2 of 12)	-5488	Irak2	chr6	113663148	113663313	166	B3A	SINE	B2	165
chr6	113663028	113663362	335	6.46	7.2	4.87	2.33	7.73e-13	4.28e-11	Up	Intron (ENSMUST00000059286.13/108960, intron 2 of 12)	-5488	Irak2	chr6	113663313	113663382	70	(TG)n	Simple_repeat	Simple_repeat	49
chr9	99989398	99989557	160	4.93	5.64	3.45	2.19	3.41e-07	8.32e-06	Up	Distal Intergenic	-32743	4930519F24Rik	chr9	99989439	99989561	123	B3A	SINE	B2	118
chr9	100214443	100214737	295	5.95	6.45	5.19	1.25	0.000146	0.00179	Up	Distal Intergenic	190795	4930519F24Rik	.	.	.	.	.	.	.	.
chr9	99994227	99994645	419	7.43	7.75	7.03	0.72	0.00342	0.024	Up	Distal Intergenic	-27655	4930519F24Rik	.	.	.	.	.	.	.	.
chr8	94830006	94830171	166	6.93	7.68	5.3	2.37	5.28e-15	3.59e-13	Up	Promoter (1-2kb)	1691	Ciapin1	chr8	94829833	94830262	430	RLTR10C	LTR	ERVK	165
chr2	170468159	170468282	124	5.47	5.9	4.86	1.04	0.00664	0.0401	Up	Distal Intergenic	-28146	Pfdn4	chr2	170468137	170468328	192	B3A	SINE	B2	123
chr2	170496095	170496362	268	6.07	6.48	5.49	0.98	0.0026	0.0193	Up	Promoter (<=1kb)	-66	Pfdn4	.	.	.	.	.	.	.	.
chr2	4855734	4855868	135	4.49	5.39	1.6	3.79	2.86e-10	1.17e-08	Up	Distal Intergenic	-25696	Sephs1	chr2	4855717	4855900	184	B3	SINE	B2	134
chr2	4861702	4861848	147	5.86	6.28	5.25	1.04	0.00365	0.0253	Up	Distal Intergenic	-19716	Sephs1	chr2	4861646	4862075	430	ORR1D1	LTR	ERVL-MaLR	146
chr19	30045970	30046137	168	5.04	5.88	2.79	3.09	2.45e-11	1.15e-09	Up	Intron (ENSMUST00000134518.7/109113, intron 2 of 2)	15381	Uhrf2	chr19	30045942	30046141	200	B3	SINE	B2	167
chr19	30023523	30023655	133	7.46	8.23	5.71	2.52	1.1e-19	1.09e-17	Up	Distal Intergenic	-6858	Uhrf2	chr19	30023385	30023797	413	RLTR10C	LTR	ERVK	132
chr19	30044786	30044919	134	4.72	5.54	2.69	2.85	1.33e-08	4.21e-07	Up	Intron (ENSMUST00000134518.7/109113, intron 2 of 2)	14197	Uhrf2	chr19	30044745	30044952	208	B3	SINE	B2	133
chr19	30125170	30125603	434	7.54	7.95	6.95	1	0.000122	0.00153	Up	Intron (ENSMUST00000025778.7/104174, intron 15 of 24)	33209	Uhrf2	.	.	.	.	.	.	.	.
chr6	140576973	140577725	753	7.59	8.14	6.69	1.45	4.31e-08	1.25e-06	Up	Promoter (<=1kb)	0	Plekha5	chr6	140576933	140577143	211	ORR1E	LTR	ERVL-MaLR	170
chr6	140576973	140577725	753	7.59	8.14	6.69	1.45	4.31e-08	1.25e-06	Up	Promoter (<=1kb)	0	Plekha5	chr6	140577615	140577795	181	B2_Mm2	SINE	B2	110
chr6	140389040	140389319	280	6.03	6.84	4	2.85	4.5e-14	2.81e-12	Up	Distal Intergenic	-34735	Plekha5	chr6	140389082	140389478	397	IAPLTR2a	LTR	ERVK	237
chr6	140311820	140312137	318	5.4	6.22	3.35	2.86	1.09e-11	5.29e-10	Up	Distal Intergenic	-111917	Plekha5	chr6	140312068	140312261	194	B3A	SINE	B2	69
chr6	140258902	140259022	121	4.17	4.88	2.69	2.19	0.000123	0.00155	Up	Distal Intergenic	-165032	Plekha5	chr6	140258853	140258909	57	(TG)n	Simple_repeat	Simple_repeat	7
chr6	140258902	140259022	121	4.17	4.88	2.69	2.19	0.000123	0.00155	Up	Distal Intergenic	-165032	Plekha5	chr6	140258909	140259104	196	B3	SINE	B2	113
chr6	140417591	140417868	278	6.08	6.56	5.34	1.22	0.000619	0.00608	Up	Distal Intergenic	-6186	Plekha5	chr6	140417522	140417635	114	B1_Mus1	SINE	Alu	44
chr6	140417591	140417868	278	6.08	6.56	5.34	1.22	0.000619	0.00608	Up	Distal Intergenic	-6186	Plekha5	chr6	140417741	140418109	369	ORR1C1	LTR	ERVL-MaLR	127
chr6	140548484	140548681	198	5.83	6.29	5.15	1.14	0.00103	0.00925	Up	Intron (ENSMUST00000087622.5/109135, intron 11 of 30)	4331	Plekha5	chr6	140548521	140548642	122	B3	SINE	B2	121
chr6	140517287	140517423	137	5.75	6.23	5.03	1.2	0.00119	0.0104	Up	Promoter (<=1kb)	863	Plekha5	chr6	140517263	140517433	171	B3	SINE	B2	136
chr6	140576210	140576607	398	6.1	6.87	4.33	2.54	3.04e-14	1.93e-12	Up	Promoter (<=1kb)	-528	Plekha5	.	.	.	.	.	.	.	.
chr6	140322065	140322250	186	6.23	6.88	4.99	1.89	7.78e-10	2.99e-08	Up	Distal Intergenic	-101804	Plekha5	chr6	140322079	140322444	366	IAPLTR1_Mm	LTR	ERVK	171
chr6	140326471	140326631	161	6.35	6.88	5.51	1.38	3.24e-06	6.33e-05	Up	Distal Intergenic	-97423	Plekha5	chr6	140326469	140326834	366	IAPLTR1_Mm	LTR	ERVK	160
chr6	140468790	140468883	94	4.17	4.77	3.09	1.68	0.00329	0.0233	Up	Intron (ENSMUST00000087622.5/109135, intron 3 of 30)	35801	Plekha5	chr6	140468708	140468914	207	B3A	SINE	B2	93
chr6	140275403	140275667	265	8.71	9.52	6.64	2.88	9.82e-29	2.02e-26	Up	Distal Intergenic	-148387	Plekha5	chr6	140275350	140275833	484	RLTR10C	LTR	ERVK	264
chr8	23232061	23232211	151	5.13	6	2.53	3.47	5.88e-14	3.64e-12	Up	Intron (ENSMUST00000033950.6/109145, intron 4 of 7)	5448	Gins4	chr8	23232000	23232197	198	B3	SINE	B2	136
chr5	115163683	115163868	186	7.28	7.84	6.34	1.51	1.34e-09	4.97e-08	Up	Distal Intergenic	-5504	Mlec	chr5	115163624	115163816	193	B3A	SINE	B2	133
chr5	115165482	115165606	125	4.89	5.51	3.77	1.74	5.32e-05	0.000751	Up	Distal Intergenic	-7303	Mlec	chr5	115165483	115165669	187	B3A	SINE	B2	123
chr19	7498898	7499166	269	6.49	6.83	6.04	0.8	0.00826	0.0473	Up	Intron (ENSMUST00000170373.7/109168, intron 1 of 12)	4460	Atl3	chr19	7498713	7498900	188	B2_Mm1a	SINE	B2	2
chr19	7498898	7499166	269	6.49	6.83	6.04	0.8	0.00826	0.0473	Up	Intron (ENSMUST00000170373.7/109168, intron 1 of 12)	4460	Atl3	chr19	7499154	7499345	192	B2_Mm2	SINE	B2	12
chr19	7523403	7523516	114	4.21	5.08	1.68	3.4	4e-07	9.6e-06	Up	Intron (ENSMUST00000170373.7/109168, intron 8 of 12)	28965	Atl3	chr19	7523363	7523500	138	B3	SINE	B2	97
chr1	73609927	73610137	211	4.11	4.73	3.01	1.72	0.0026	0.0194	Up	Distal Intergenic	133810	6030407O03Rik	chr1	73609822	73610262	441	RMER19B2	LTR	ERVK	210
chr1	73880668	73881160	493	6.17	6.63	5.51	1.12	0.0001	0.0013	Up	Distal Intergenic	-16202	6030407O03Rik	chr1	73880634	73881089	456	RMER16A3	LTR	ERVK	421
chr1	73880668	73881160	493	6.17	6.63	5.51	1.12	0.0001	0.0013	Up	Distal Intergenic	-16202	6030407O03Rik	chr1	73881089	73882805	1717	RMER16-int	LTR	ERVK	71
chr10	43166954	43167076	123	4.36	5.19	2.17	3.02	7.78e-07	1.76e-05	Up	Intron (ENSMUST00000040275.8/109205, intron 1 of 6)	7445	Sobp	chr10	43166960	43167142	183	B3A	SINE	B2	116
chr10	43163254	43163405	152	4.82	5.7	2.14	3.56	2.48e-09	8.85e-08	Up	Intron (ENSMUST00000040275.8/109205, intron 1 of 6)	11116	Sobp	chr10	43163198	43163359	162	B3	SINE	B2	105
chr10	43163254	43163405	152	4.82	5.7	2.14	3.56	2.48e-09	8.85e-08	Up	Intron (ENSMUST00000040275.8/109205, intron 1 of 6)	11116	Sobp	chr10	43163359	43163400	42	(CA)n	Simple_repeat	Simple_repeat	41
chr10	43163254	43163405	152	4.82	5.7	2.14	3.56	2.48e-09	8.85e-08	Up	Intron (ENSMUST00000040275.8/109205, intron 1 of 6)	11116	Sobp	chr10	43163400	43163423	24	B3A	SINE	B2	5
chr8	108320459	108320579	121	3.73	4.55	1.62	2.94	7.86e-05	0.00105	Up	Intron (ENSMUST00000220518.1/11906, intron 2 of 15)	264016	Lncbate1	chr8	108320436	108320804	369	ORR1D2	LTR	ERVL-MaLR	120
chr8	108369156	108369624	469	7.56	7.96	7	0.96	0.00177	0.0143	Up	Intron (ENSMUST00000220518.1/11906, intron 3 of 15)	214971	Lncbate1	chr8	108369608	108369785	178	MER20	DNA	hAT-Charlie	16
chr3	67505335	67505782	448	6.51	7.01	5.73	1.28	8.81e-05	0.00116	Up	Intron (ENSMUST00000054825.4/109222, intron 1 of 5)	9741	Rarres1	chr3	67505101	67505621	521	MERVL_2A-int	LTR	ERVL	286
chr3	67505335	67505782	448	6.51	7.01	5.73	1.28	8.81e-05	0.00116	Up	Intron (ENSMUST00000054825.4/109222, intron 1 of 5)	9741	Rarres1	chr3	67505621	67506185	565	RLTR1D2_MM	LTR	ERV1	161
chr1	179715889	179716053	165	4.6	5.22	3.49	1.73	0.000935	0.00852	Up	Intron (ENSMUST00000131716.3/ENSMUST00000131716.3, intron 8 of 22)	35342	Sccpdh	chr1	179715679	179716000	322	RMER17C2	LTR	ERVK	111
chr1	179715889	179716053	165	4.6	5.22	3.49	1.73	0.000935	0.00852	Up	Intron (ENSMUST00000131716.3/ENSMUST00000131716.3, intron 8 of 22)	35342	Sccpdh	chr1	179716007	179716162	156	B2_Mm2	SINE	B2	46
chr1	179689031	179689291	261	5.98	6.49	5.2	1.28	2.78e-05	0.000426	Up	Distal Intergenic	8484	Sccpdh	chr1	179688779	179689158	380	Lx8	LINE	L1	127
chr1	179689031	179689291	261	5.98	6.49	5.2	1.28	2.78e-05	0.000426	Up	Distal Intergenic	8484	Sccpdh	chr1	179689174	179689400	227	Lx8	LINE	L1	117
chr1	179654087	179654675	589	10.29	11.2	7.13	4.07	2.13e-65	7.73e-62	Up	Distal Intergenic	-13535	Sccpdh	chr1	179654038	179654470	433	RLTR10C	LTR	ERVK	383
chr1	179654087	179654675	589	10.29	11.2	7.13	4.07	2.13e-65	7.73e-62	Up	Distal Intergenic	-13535	Sccpdh	chr1	179654470	179654497	28	MTC-int	LTR	ERVL-MaLR	27
chr1	179654087	179654675	589	10.29	11.2	7.13	4.07	2.13e-65	7.73e-62	Up	Distal Intergenic	-13535	Sccpdh	chr1	179654497	179654816	320	MMERVK10C-int	LTR	ERVK	178
chr1	179702921	179703131	211	6.02	6.43	5.45	0.99	0.00224	0.0173	Up	Intron (ENSMUST00000131716.3/ENSMUST00000131716.3, intron 16 of 22)	22374	Sccpdh	chr1	179702753	179702944	192	B2_Mm1a	SINE	B2	23
chr1	179702921	179703131	211	6.02	6.43	5.45	0.99	0.00224	0.0173	Up	Intron (ENSMUST00000131716.3/ENSMUST00000131716.3, intron 16 of 22)	22374	Sccpdh	chr1	179702952	179703144	193	B2_Mm2	SINE	B2	179
chr1	179660628	179661089	462	9.97	10.86	7.19	3.68	3.49e-57	5.89e-54	Up	Distal Intergenic	-7121	Sccpdh	chr1	179655630	179660663	5034	MMERVK10C-int	LTR	ERVK	35
chr1	179660628	179661089	462	9.97	10.86	7.19	3.68	3.49e-57	5.89e-54	Up	Distal Intergenic	-7121	Sccpdh	chr1	179660663	179661095	433	RLTR10C	LTR	ERVK	426
chr1	179689578	179689735	158	4.92	5.37	4.27	1.1	0.00435	0.0289	Up	Distal Intergenic	9031	Sccpdh	chr1	179689446	179689586	141	B1_Mus1	SINE	Alu	8
chr1	179689578	179689735	158	4.92	5.37	4.27	1.1	0.00435	0.0289	Up	Distal Intergenic	9031	Sccpdh	chr1	179689613	179689774	162	L1M2	LINE	L1	122
chr2	49198029	49198231	203	8.73	9.56	6.56	3.01	1.57e-32	4.34e-30	Up	Intron (ENSMUST00000112745.7/109241, intron 6 of 10)	-47738	Mbd5	chr2	49197958	49198355	398	RLTR10C	LTR	ERVK	202
chr6	128099994	128100131	138	5.5	6.16	4.29	1.87	1.66e-06	3.48e-05	Up	Intron (ENSMUST00000112173.7/109246, intron 1 of 7)	24185	Tspan9	chr6	128099968	128100181	214	B3	SINE	B2	137
chr6	127991629	127991869	241	7.06	7.4	6.61	0.78	0.00174	0.0141	Up	Intron (ENSMUST00000112173.7/109246, intron 2 of 7)	-24812	Tspan9	.	.	.	.	.	.	.	.
chr6	127933877	127934398	522	6.04	6.75	4.55	2.2	2.22e-11	1.05e-09	Up	Intron (ENSMUST00000032501.5/68498, intron 3 of 7)	32419	Tspan9	chr6	127933820	127933977	158	RMER15	LTR	ERVL	100
chr6	127933877	127934398	522	6.04	6.75	4.55	2.2	2.22e-11	1.05e-09	Up	Intron (ENSMUST00000032501.5/68498, intron 3 of 7)	32419	Tspan9	chr6	127934337	127934550	214	MER20	DNA	hAT-Charlie	61
chr7	89617417	89617512	96	3.75	4.7	-0.14	4.83	1.34e-06	2.88e-05	Up	Distal Intergenic	-14880	Me3	chr7	89617394	89617600	207	B3	SINE	B2	95
chr7	89611226	89611604	379	7.59	8.06	6.9	1.15	6.29e-05	0.000869	Up	Distal Intergenic	-20788	Me3	.	.	.	.	.	.	.	.
chr5	135975954	135976368	415	6.84	7.52	5.49	2.03	7.44e-10	2.86e-08	Up	Promoter (1-2kb)	-1423	Ssc4d	chr5	135975832	135976002	171	B3A	SINE	B2	48
chr5	135975954	135976368	415	6.84	7.52	5.49	2.03	7.44e-10	2.86e-08	Up	Promoter (1-2kb)	-1423	Ssc4d	chr5	135976012	135976092	81	B4	SINE	B4	80
chr5	135975954	135976368	415	6.84	7.52	5.49	2.03	7.44e-10	2.86e-08	Up	Promoter (1-2kb)	-1423	Ssc4d	chr5	135976111	135976214	104	PB1D10	SINE	Alu	103
chr15	84670070	84670536	467	6.69	7.15	6	1.15	0.00012	0.00152	Up	Promoter (<=1kb)	450	Prr5	chr15	84670036	84670079	44	MIR3	SINE	MIR	9
chr15	84638542	84638709	168	4.75	5.37	3.62	1.76	7.79e-05	0.00104	Up	Distal Intergenic	-30911	Prr5	chr15	84638466	84638733	268	MTEa	LTR	ERVL-MaLR	167
chr10	88550349	88550473	125	4.74	5.5	3.07	2.42	2.35e-06	4.76e-05	Up	Intron (ENSMUST00000121629.7/109272, intron 14 of 28)	2949	Mybpc1	chr10	88550330	88550545	216	B3	SINE	B2	124
chr1	10936619	10936886	268	8.49	9.29	6.48	2.82	3.84e-31	9.49e-29	Up	Distal Intergenic	-56579	Prex2	chr1	10936558	10936975	418	RLTR10C	LTR	ERVK	267
chr5	43432364	43432790	427	8.73	9.54	6.73	2.81	8.49e-32	2.21e-29	Up	Distal Intergenic	-82748	C1qtnf7	chr5	43426234	43432408	6175	L1Md_A	LINE	L1	44
chr5	43432364	43432790	427	8.73	9.54	6.73	2.81	8.49e-32	2.21e-29	Up	Distal Intergenic	-82748	C1qtnf7	chr5	43432408	43432821	414	RLTR10C	LTR	ERVK	382
chr9	123198127	123198220	94	5.43	5.92	4.69	1.23	0.000452	0.00469	Up	Intron (ENSMUST00000039229.7/109332, intron 1 of 8)	17779	Cdcp1	chr9	123197842	123198207	366	IAPLTR1_Mm	LTR	ERVK	80
chr9	123187615	123187962	348	5.75	6.21	5.07	1.14	0.00135	0.0115	Up	Intron (ENSMUST00000039229.7/109332, intron 2 of 8)	-9509	Cdcp1	chr9	123187914	123187929	16	RSINE1	SINE	B4	15
chr9	123187615	123187962	348	5.75	6.21	5.07	1.14	0.00135	0.0115	Up	Intron (ENSMUST00000039229.7/109332, intron 2 of 8)	-9509	Cdcp1	chr9	123187929	123187983	55	(TG)n	Simple_repeat	Simple_repeat	33
chr10	110484848	110485262	415	6.57	6.93	6.11	0.81	0.00176	0.0142	Up	Distal Intergenic	-111004	9230102K24Rik	.	.	.	.	.	.	.	.
chr10	110546878	110547058	181	7.15	7.9	5.51	2.39	7.05e-14	4.33e-12	Up	Distal Intergenic	-49208	9230102K24Rik	chr10	110546743	110547240	498	RLTR10C	LTR	ERVK	180
chr2	27126096	27126263	168	5.12	5.64	4.3	1.34	0.00242	0.0183	Up	Intron (ENSMUST00000151224.2/109349, intron 1 of 2)	16228	Fam163b	.	.	.	.	.	.	.	.
chr2	27146197	27146359	163	6.5	7.15	5.31	1.84	1.85e-08	5.72e-07	Up	Exon (ENSMUST00000150024.1/329371, exon 7 of 7)	-3706	Fam163b	chr2	27146097	27146528	432	RLTR10C	LTR	ERVK	162
chr7	132897445	132897592	148	4.89	5.63	3.31	2.32	2.76e-06	5.47e-05	Up	Intron (ENSMUST00000124096.7/14183, intron 2 of 6)	18070	Abraxas2	chr7	132897438	132897536	99	B3A	SINE	B2	91
chr7	132898356	132898485	130	5.2	5.91	3.74	2.17	3.24e-08	9.61e-07	Up	Intron (ENSMUST00000124096.7/14183, intron 2 of 6)	18981	Abraxas2	chr7	132898310	132898513	204	B3A	SINE	B2	129
chr7	132903947	132904061	115	4.43	5.09	3.17	1.93	5.94e-05	0.000827	Up	Intron (ENSMUST00000124096.7/14183, intron 2 of 6)	24572	Abraxas2	chr7	132903923	132904117	195	B3	SINE	B2	114
chr6	138342831	138342908	78	5.21	5.78	4.27	1.5	4.9e-05	0.000699	Up	Distal Intergenic	78544	Lmo3	chr6	138342712	138343855	1144	ERVB4_1B-I_MM-int	LTR	ERVK	77
chr6	138313460	138313659	200	4.77	5.42	3.59	1.83	4.55e-05	0.000654	Up	Distal Intergenic	107793	Lmo3	chr6	138313417	138313570	154	ORR1E	LTR	ERVL-MaLR	110
chr6	138314393	138314508	116	3.79	4.67	1.13	3.54	2.19e-06	4.46e-05	Up	Distal Intergenic	106944	Lmo3	chr6	138314377	138314538	162	B3A	SINE	B2	115
chr13	38164835	38165426	592	7.57	8	6.94	1.06	0.000687	0.00661	Up	Exon (ENSMUST00000124830.2/109620, exon 2 of 24)	-12941	Dsp	chr13	38165015	38165100	86	ORR1D2	LTR	ERVL-MaLR	85
chr13	38164835	38165426	592	7.57	8	6.94	1.06	0.000687	0.00661	Up	Exon (ENSMUST00000124830.2/109620, exon 2 of 24)	-12941	Dsp	chr13	38165328	38165485	158	B1_Mur3	SINE	Alu	98
chr18	84874238	84874585	348	5.86	6.3	5.24	1.06	0.00114	0.00997	Up	Intron (ENSMUST00000160180.7/109672, intron 3 of 4)	-3016	Cyb5a	chr18	84874485	84874686	202	ID_B1	SINE	B4	100
chr18	84879618	84879777	160	3.74	4.43	2.34	2.09	0.00171	0.0139	Up	Promoter (2-3kb)	2017	Cyb5a	.	.	.	.	.	.	.	.
chr3	127446257	127446490	234	6.46	6.79	6.03	0.75	0.00649	0.0394	Up	Intron (ENSMUST00000182711.7/109676, intron 1 of 31)	-37198	Ank2	.	.	.	.	.	.	.	.
chr3	127414588	127414688	101	4.04	4.75	2.56	2.2	0.000171	0.00205	Up	Intron (ENSMUST00000182711.7/109676, intron 1 of 31)	-5529	Ank2	chr3	127414604	127414747	144	B3A	SINE	B2	84
chr3	127363092	127363208	117	3.98	4.68	2.58	2.1	0.00042	0.0044	Up	Intron (ENSMUST00000182078.8/109676, intron 1 of 45)	45746	Ank2	chr3	127362531	127363120	590	Lx8	LINE	L1	28
chr3	127213607	127214019	413	6.61	7.03	6.02	1.01	0.000167	0.00201	Up	Intron (ENSMUST00000182078.8/109676, intron 2 of 45)	11828	Ank2	chr3	127213622	127213933	312	ORR1D2	LTR	ERVL-MaLR	311
chr3	127429902	127430373	472	6	6.5	5.24	1.26	3.88e-05	0.000569	Up	Intron (ENSMUST00000182711.7/109676, intron 1 of 31)	-20843	Ank2	.	.	.	.	.	.	.	.
chr3	127363565	127363924	360	6.48	6.84	6	0.84	0.00365	0.0253	Up	Intron (ENSMUST00000182078.8/109676, intron 1 of 45)	45030	Ank2	.	.	.	.	.	.	.	.
chr3	127280510	127280625	116	4.35	5.24	1.57	3.68	2.03e-08	6.26e-07	Up	Intron (ENSMUST00000182078.8/109676, intron 2 of 45)	-54577	Ank2	chr3	127280448	127280627	180	B3A	SINE	B2	115
chr3	127015750	127015879	130	5.53	6	4.85	1.15	0.00069	0.00663	Up	Exon (ENSMUST00000183097.1/109676, exon 2 of 2)	8369	Ank2	.	.	.	.	.	.	.	.
chr15	83193572	83193999	428	8.47	9.28	6.41	2.87	6.71e-28	1.26e-25	Up	Distal Intergenic	-20980	Cyb5r3	chr15	83193636	83193742	107	RMER6B	LTR	ERVK	106
chr15	83193572	83193999	428	8.47	9.28	6.41	2.87	6.71e-28	1.26e-25	Up	Distal Intergenic	-20980	Cyb5r3	chr15	83193758	83194188	431	MMERGLN_LTR	LTR	ERV1	241
chr15	83201827	83201974	148	7.97	8.71	6.32	2.39	4.69e-18	4.15e-16	Up	Distal Intergenic	-29235	Cyb5r3	chr15	83201743	83202173	431	MMERGLN_LTR	LTR	ERV1	147
chr15	83202381	83203341	961	7.76	8.67	4.7	3.97	8.61e-37	3.54e-34	Up	Distal Intergenic	-29789	Cyb5r3	chr15	83202954	83203064	111	PB1D10	SINE	Alu	110
chr15	83202381	83203341	961	7.76	8.67	4.7	3.97	8.61e-37	3.54e-34	Up	Distal Intergenic	-29789	Cyb5r3	chr15	83203078	83203358	281	RMER10A	LTR	ERVL	263
chr15	83195236	83195765	530	10.77	11.29	9.94	1.35	2.3e-10	9.48e-09	Up	Distal Intergenic	-22644	Cyb5r3	chr15	83194188	83201743	7556	MMERGLN-int	LTR	ERV1	529
chr2	127079053	127079536	484	6.9	7.51	5.81	1.7	9.08e-09	2.96e-07	Up	Promoter (<=1kb)	-741	Blvra	chr2	127079043	127079300	258	RLTR28	LTR	ERVL	247
chr2	127079053	127079536	484	6.9	7.51	5.81	1.7	9.08e-09	2.96e-07	Up	Promoter (<=1kb)	-741	Blvra	chr2	127079297	127079317	21	MTD	LTR	ERVL-MaLR	20
chr2	127079053	127079536	484	6.9	7.51	5.81	1.7	9.08e-09	2.96e-07	Up	Promoter (<=1kb)	-741	Blvra	chr2	127079317	127079674	358	MTA_Mm	LTR	ERVL-MaLR	219
chr16	93685902	93686090	189	6.84	7.47	5.67	1.8	2.39e-12	1.25e-10	Up	Intron (ENSMUST00000039620.6/109857, intron 2 of 2)	2643	Cbr3	chr16	93685910	93686102	193	B2_Mm2	SINE	B2	180
chr7	13063541	13063624	84	5.16	5.66	4.4	1.25	0.00201	0.0158	Up	Distal Intergenic	-8777	Mzf1	chr7	13063516	13063692	177	B2_Mm2	SINE	B2	83
chr5	130011096	130011204	109	4.62	5.38	2.9	2.48	1.78e-06	3.71e-05	Up	Downstream (<1kb)	3518	Asl	chr5	130011079	130011254	176	B3A	SINE	B2	108
chr3	105771683	105771819	137	5.39	6.03	4.24	1.79	2.43e-06	4.9e-05	Up	Intron (ENSMUST00000090678.10/109905, intron 1 of 7)	-21355	Rap1a	chr3	105771653	105771850	198	B3	SINE	B2	136
chr6	136861080	136861344	265	6.41	6.74	5.98	0.77	0.00855	0.0486	Up	Distal Intergenic	-3347	Art4	.	.	.	.	.	.	.	.
chr5	92383705	92384129	425	7.96	8.39	7.36	1.04	3.76e-05	0.000554	Up	Intron (ENSMUST00000154245.7/109979, intron 2 of 3)	-2758	Art3	chr5	92383830	92384068	239	B4A	SINE	B4	238
chr5	92383705	92384129	425	7.96	8.39	7.36	1.04	3.76e-05	0.000554	Up	Intron (ENSMUST00000154245.7/109979, intron 2 of 3)	-2758	Art3	chr5	92384071	92384100	30	(CA)n	Simple_repeat	Simple_repeat	29
chr5	92383705	92384129	425	7.96	8.39	7.36	1.04	3.76e-05	0.000554	Up	Intron (ENSMUST00000154245.7/109979, intron 2 of 3)	-2758	Art3	chr5	92384100	92384146	47	(GA)n	Simple_repeat	Simple_repeat	29
chr7	118346111	118346351	241	4.44	5	3.5	1.51	0.00176	0.0142	Up	Distal Intergenic	96163	Syt17	chr7	118346096	118346196	101	ORR1E	LTR	ERVL-MaLR	85
chr7	118346111	118346351	241	4.44	5	3.5	1.51	0.00176	0.0142	Up	Distal Intergenic	96163	Syt17	chr7	118346238	118346755	518	RLTR28	LTR	ERVL	113
chr7	118409551	118409694	144	5.24	5.71	4.53	1.17	0.0015	0.0125	Up	Intron (ENSMUST00000081574.7/110058, intron 6 of 7)	32820	Syt17	chr7	118409532	118409557	26	(CAAAAA)n	Simple_repeat	Simple_repeat	6
chr2	125355248	125356175	928	8.77	9.11	8.31	0.8	0.000497	0.00506	Up	Intron (ENSMUST00000028633.12/14118, intron 32 of 65)	107766	Dut	chr2	125356111	125356184	74	RLTR20A4	LTR	ERVK	64
chr6	115685389	115685620	232	5.39	5.89	4.64	1.25	0.00106	0.00944	Up	Distal Intergenic	-8754	Raf1	chr6	115684997	115685679	683	RLTR17	LTR	ERVK	231
chr6	115654369	115654541	173	4.4	5.03	3.26	1.77	0.000458	0.00474	Up	Intron (ENSMUST00000112949.7/110157, intron 1 of 16)	-19748	Raf1	.	.	.	.	.	.	.	.
chr6	115701435	115701537	103	4.83	5.63	2.87	2.76	8.11e-09	2.67e-07	Up	Distal Intergenic	-24800	Raf1	chr6	115701460	115701620	161	B3A	SINE	B2	77
chr6	115684951	115685254	304	6.07	6.49	5.46	1.03	0.00169	0.0137	Up	Distal Intergenic	-8316	Raf1	chr6	115684719	115684997	279	MT2B2	LTR	ERVL	46
chr6	115684951	115685254	304	6.07	6.49	5.46	1.03	0.00169	0.0137	Up	Distal Intergenic	-8316	Raf1	chr6	115684997	115685679	683	RLTR17	LTR	ERVK	257
chr3	135534258	135534354	97	3.68	4.42	2.12	2.3	0.000907	0.0083	Up	Intron (ENSMUST00000131610.7/110173, intron 8 of 13)	-10302	Manba	.	.	.	.	.	.	.	.
chr3	135519653	135520063	411	7.6	8.08	6.88	1.2	5.52e-06	0.000102	Up	Intron (ENSMUST00000131610.7/110173, intron 6 of 13)	2503	Manba	.	.	.	.	.	.	.	.
chr3	135498089	135498262	174	5.73	6.54	3.73	2.81	2.06e-13	1.21e-11	Up	Intron (ENSMUST00000131610.7/110173, intron 1 of 13)	12464	Manba	chr3	135497965	135498124	160	ERVB4_1B-I_MM-int	LTR	ERVK	35
chr3	135498089	135498262	174	5.73	6.54	3.73	2.81	2.06e-13	1.21e-11	Up	Intron (ENSMUST00000131610.7/110173, intron 1 of 13)	12464	Manba	chr3	135498145	135498308	164	B3A	SINE	B2	117
chr3	135498761	135499301	541	8.06	8.83	6.32	2.5	5.7e-24	7.93e-22	Up	Intron (ENSMUST00000131610.7/110173, intron 1 of 13)	13136	Manba	chr3	135498694	135498818	125	B1F	SINE	Alu	57
chr3	135498761	135499301	541	8.06	8.83	6.32	2.5	5.7e-24	7.93e-22	Up	Intron (ENSMUST00000131610.7/110173, intron 1 of 13)	13136	Manba	chr3	135498845	135498865	21	(CA)n	Simple_repeat	Simple_repeat	20
chr3	135498761	135499301	541	8.06	8.83	6.32	2.5	5.7e-24	7.93e-22	Up	Intron (ENSMUST00000131610.7/110173, intron 1 of 13)	13136	Manba	chr3	135498868	135498973	106	B1F	SINE	Alu	105
chr3	135522040	135522290	251	6.79	7.24	6.11	1.13	2.53e-05	0.000391	Up	Promoter (<=1kb)	-645	Manba	.	.	.	.	.	.	.	.
chr3	135556892	135557364	473	6.13	6.77	4.93	1.83	2.6e-09	9.26e-08	Up	Intron (ENSMUST00000029814.9/110173, intron 13 of 16)	-5827	Manba	chr3	135557236	135557578	343	Lx2	LINE	L1	128
chr15	99400659	99400952	294	7.68	8.25	6.72	1.53	2.38e-07	6.01e-06	Up	Promoter (<=1kb)	-133	Tmbim6	chr15	99400619	99400767	149	B1_Mur1	SINE	Alu	108
chr15	99400659	99400952	294	7.68	8.25	6.72	1.53	2.38e-07	6.01e-06	Up	Promoter (<=1kb)	-133	Tmbim6	chr15	99400782	99400959	178	B3	SINE	B2	170
chr15	99400659	99400952	294	7.68	8.25	6.72	1.53	2.38e-07	6.01e-06	Up	Promoter (<=1kb)	-133	Tmbim6	chr15	99400928	99401036	109	RLTR17B_Mm	LTR	ERVK	24
chr15	99413539	99413724	186	5.24	5.75	4.44	1.31	0.000261	0.00295	Up	Exon (ENSMUST00000231179.1/ENSMUST00000231179.1, exon 1 of 1)	6272	Tmbim6	.	.	.	.	.	.	.	.
chr14	64309960	64310107	148	4.64	5.18	3.76	1.42	0.0031	0.0222	Up	Intron (ENSMUST00000067927.8/110265, intron 7 of 10)	106841	Msra	.	.	.	.	.	.	.	.
chr14	64309452	64309605	154	4.66	5.54	2.09	3.45	4.42e-09	1.52e-07	Up	Intron (ENSMUST00000067927.8/110265, intron 7 of 10)	107343	Msra	chr14	64309458	64309631	174	B3A	SINE	B2	147
chr14	64373508	64373768	261	6.71	7.05	6.26	0.79	0.00598	0.037	Up	Intron (ENSMUST00000067927.8/110265, intron 6 of 10)	43180	Msra	chr14	64373528	64373854	327	Lx8	LINE	L1	240
chr14	64359541	64359717	177	4.45	5.05	3.42	1.62	0.00086	0.00794	Up	Intron (ENSMUST00000067927.8/110265, intron 6 of 10)	57231	Msra	chr14	64359355	64359846	492	RMER4B	LTR	ERVK	176
chr10	75193007	75193153	147	4.54	5.39	2.21	3.19	2.92e-09	1.03e-07	Up	Distal Intergenic	16631	Bcr	chr10	75192549	75193009	461	L1M2	LINE	L1	2
chr10	75193007	75193153	147	4.54	5.39	2.21	3.19	2.92e-09	1.03e-07	Up	Distal Intergenic	16631	Bcr	chr10	75193009	75193201	193	B3	SINE	B2	144
chr10	75191712	75192036	325	6.24	6.77	5.4	1.37	8.72e-05	0.00115	Up	Distal Intergenic	15336	Bcr	chr10	75191703	75191875	173	B3A	SINE	B2	163
chr10	75191712	75192036	325	6.24	6.77	5.4	1.37	8.72e-05	0.00115	Up	Distal Intergenic	15336	Bcr	chr10	75191895	75192092	198	B2_Mm2	SINE	B2	141
chr10	75129190	75129721	532	7.63	8.14	6.81	1.33	1.78e-06	3.7e-05	Up	Intron (ENSMUST00000164107.2/110279, intron 2 of 22)	-30639	Bcr	chr10	75129639	75129757	119	MLT1B	LTR	ERVL-MaLR	82
chr10	75176457	75176906	450	6.8	7.47	5.49	1.98	2.98e-09	1.05e-07	Up	Promoter (<=1kb)	81	Bcr	.	.	.	.	.	.	.	.
chr10	75112473	75112692	220	6.49	6.85	6.01	0.84	0.00167	0.0136	Up	Intron (ENSMUST00000164107.2/110279, intron 1 of 22)	-47668	Bcr	.	.	.	.	.	.	.	.
chr10	75135900	75136279	380	6.66	7.23	5.71	1.52	2.97e-06	5.85e-05	Up	Exon (ENSMUST00000164107.2/110279, exon 5 of 23)	-24081	Bcr	.	.	.	.	.	.	.	.
chr4	152036612	152036773	162	6.54	7.04	5.76	1.28	4.69e-06	8.8e-05	Up	Promoter (1-2kb)	1795	Tas1r1	chr4	152036594	152036755	162	B2_Mm2	SINE	B2	143
chr4	152036612	152036773	162	6.54	7.04	5.76	1.28	4.69e-06	8.8e-05	Up	Promoter (1-2kb)	1795	Tas1r1	chr4	152036761	152036891	131	B1_Mus1	SINE	Alu	12
chr9	6958414	6958632	219	5.13	5.85	3.65	2.2	4.35e-06	8.24e-05	Up	Promoter (1-2kb)	-1725	Dync2h1	chr9	6958254	6958586	333	RMER19C	LTR	ERVK	172
chr9	6668318	6668744	427	6.58	7.02	5.96	1.06	0.000935	0.00851	Up	Distal Intergenic	287945	Dync2h1	.	.	.	.	.	.	.	.
chr19	4294487	4294619	133	4.59	5.25	3.36	1.89	6.65e-05	0.00091	Up	Intron (ENSMUST00000025791.11/110355, intron 3 of 21)	-2676	Grk2	.	.	.	.	.	.	.	.
chr6	113806330	113806600	271	5.94	6.43	5.19	1.24	0.00022	0.00254	Up	Intron (ENSMUST00000101045.9/11941, intron 7 of 21)	-65587	Sec13	chr6	113805994	113806367	374	Charlie4a	DNA	hAT-Charlie	37
chr6	113806330	113806600	271	5.94	6.43	5.19	1.24	0.00022	0.00254	Up	Intron (ENSMUST00000101045.9/11941, intron 7 of 21)	-65587	Sec13	chr6	113806486	113806561	76	ID4	SINE	ID	75
chr6	113806330	113806600	271	5.94	6.43	5.19	1.24	0.00022	0.00254	Up	Intron (ENSMUST00000101045.9/11941, intron 7 of 21)	-65587	Sec13	chr6	113806563	113806764	202	ID_B1	SINE	B4	37
chr4	104816449	104816717	269	5.08	5.51	4.46	1.05	0.00613	0.0377	Up	3' UTR	17241	C8b	chr4	104816178	104816593	416	MTD	LTR	ERVL-MaLR	144
chr13	41980082	41980371	290	8.2	9.04	5.97	3.07	1.17e-30	2.77e-28	Up	Distal Intergenic	-71650	Hivep1	chr13	41979924	41980422	499	RLTR10C	LTR	ERVK	289
chr13	41988416	41988693	278	8.3	9.13	6.16	2.97	1.43e-22	1.78e-20	Up	Distal Intergenic	-63328	Hivep1	chr13	41988268	41988766	499	RLTR10C	LTR	ERVK	277
chr13	42110198	42110368	171	5.26	5.79	4.39	1.4	0.00198	0.0156	Up	Intron (ENSMUST00000060148.5/110521, intron 2 of 8)	-53954	Hivep1	.	.	.	.	.	.	.	.
chr13	42110860	42111163	304	6.67	7.36	5.31	2.05	6.09e-11	2.7e-09	Up	Intron (ENSMUST00000060148.5/110521, intron 2 of 8)	-53159	Hivep1	chr13	42110782	42111127	346	MTEa	LTR	ERVL-MaLR	267
chr13	98028004	98028203	200	5.6	6.18	4.63	1.55	1.72e-05	0.000279	Up	Intron (ENSMUST00000109426.2/110596, intron 9 of 35)	4476	Arhgef28	.	.	.	.	.	.	.	.
chr13	97852939	97853108	170	7.51	7.94	6.89	1.05	6.59e-06	0.000119	Up	Distal Intergenic	93819	Arhgef28	chr13	97849672	97852940	3269	IAPEz-int	LTR	ERVK	1
chr13	97852939	97853108	170	7.51	7.94	6.89	1.05	6.59e-06	0.000119	Up	Distal Intergenic	93819	Arhgef28	chr13	97852944	97853325	382	IAPLTR1_Mm	LTR	ERVK	164
chr13	98027710	98027878	169	5.79	6.2	5.2	1	0.00106	0.00944	Up	Intron (ENSMUST00000109426.2/110596, intron 9 of 35)	4801	Arhgef28	.	.	.	.	.	.	.	.
chr13	97939408	97939813	406	8.22	8.62	7.67	0.95	0.000138	0.0017	Up	Exon (ENSMUST00000109426.2/110596, exon 31 of 36)	7114	Arhgef28	.	.	.	.	.	.	.	.
chr13	98082670	98082751	82	5.08	5.66	4.09	1.57	0.000115	0.00146	Up	Intron (ENSMUST00000109426.2/110596, intron 2 of 35)	-49991	Arhgef28	chr13	98082577	98082715	139	(CA)n	Simple_repeat	Simple_repeat	45
chr13	98082670	98082751	82	5.08	5.66	4.09	1.57	0.000115	0.00146	Up	Intron (ENSMUST00000109426.2/110596, intron 2 of 35)	-49991	Arhgef28	chr13	98082715	98083172	458	IAPLTR2_Mm	LTR	ERVK	36
chr9	42892825	42893040	216	7.25	7.66	6.69	0.97	0.00349	0.0244	Up	Intron (ENSMUST00000114865.7/110637, intron 1 of 20)	51453	Grik4	.	.	.	.	.	.	.	.
chr1	167905475	167905790	316	7.3	7.67	6.82	0.85	0.00141	0.0119	Up	Distal Intergenic	215918	Lmx1a	chr1	167905415	167905493	79	RLTR51A_Mm	LTR	ERVK?	18
chr1	167905475	167905790	316	7.3	7.67	6.82	0.85	0.00141	0.0119	Up	Distal Intergenic	215918	Lmx1a	chr1	167905493	167905531	39	(TG)n	Simple_repeat	Simple_repeat	38
chr1	167905475	167905790	316	7.3	7.67	6.82	0.85	0.00141	0.0119	Up	Distal Intergenic	215918	Lmx1a	chr1	167905531	167905556	26	RLTR51A_Mm	LTR	ERVK?	25
chr1	167905475	167905790	316	7.3	7.67	6.82	0.85	0.00141	0.0119	Up	Distal Intergenic	215918	Lmx1a	chr1	167905707	167905808	102	MIRb	SINE	MIR	83
chr18	56512442	56512577	136	4.03	4.67	2.84	1.83	0.00197	0.0156	Up	Intron (ENSMUST00000172902.1/ENSMUST00000172902.1, intron 2 of 2)	25040	Aldh7a1	chr18	56512225	56512791	567	RMER19C	LTR	ERVK	135
chr16	93912202	93912443	242	5.97	6.37	5.41	0.95	0.00415	0.0279	Up	Distal Intergenic	7509	Chaf1b	.	.	.	.	.	.	.	.
chr8	76787897	76787994	98	3.87	4.43	2.96	1.46	0.00815	0.0469	Up	Intron (ENSMUST00000143324.1/ENSMUST00000143324.1, intron 4 of 5)	-111448	Nr3c2	chr8	76787911	76788082	172	B3A	SINE	B2	83
chr8	77016792	77016937	146	5.02	5.71	3.63	2.08	1.48e-06	3.15e-05	Up	Intron (ENSMUST00000109913.8/110784, intron 2 of 8)	108520	Nr3c2	chr8	77016770	77016971	202	B3A	SINE	B2	145
chr13	81358515	81359112	598	7.03	7.37	6.58	0.79	0.00623	0.0382	Up	Intron (ENSMUST00000095585.10/110789, intron 83 of 89)	-6889	Adgrv1	.	.	.	.	.	.	.	.
chr18	83707418	83707601	184	7.94	8.29	7.47	0.81	0.000407	0.00428	Up	Distal Intergenic	378789	Tshz1	chr18	83707426	83707778	353	IAPLTR1_Mm	LTR	ERVK	175
chr18	83707418	83707601	184	7.94	8.29	7.47	0.81	0.000407	0.00428	Up	Distal Intergenic	378789	Tshz1	chr18	83700997	83707422	6426	IAPEz-int	LTR	ERVK	4
chr18	83700280	83700857	578	7.95	8.46	7.15	1.31	2.31e-08	7.07e-07	Up	Distal Intergenic	385533	Tshz1	chr18	83699926	83700481	556	L1MEc	LINE	L1	201
chr18	83700280	83700857	578	7.95	8.46	7.15	1.31	2.31e-08	7.07e-07	Up	Distal Intergenic	385533	Tshz1	chr18	83700486	83700578	93	Tigger7	DNA	TcMar-Tigger	92
chr18	83700280	83700857	578	7.95	8.46	7.15	1.31	2.31e-08	7.07e-07	Up	Distal Intergenic	385533	Tshz1	chr18	83700645	83700997	353	IAPLTR1_Mm	LTR	ERVK	212
chr4	46364490	46364610	121	4.31	5.17	1.86	3.31	3.55e-08	1.05e-06	Up	Distal Intergenic	20881	Foxe1	chr4	46364440	46364633	194	B3	SINE	B2	120
chr11	88046620	88046760	141	6.31	6.64	5.87	0.78	0.00552	0.0348	Up	Promoter (<=1kb)	-613	Srsf1	chr11	88046565	88046712	148	B1_Mus1	SINE	Alu	92
chr11	88046620	88046760	141	6.31	6.64	5.87	0.78	0.00552	0.0348	Up	Promoter (<=1kb)	-613	Srsf1	chr11	88046756	88046798	43	B1F	SINE	Alu	4
chr14	122577938	122578105	168	4.82	5.66	2.55	3.12	8.58e-10	3.28e-08	Up	Intron (ENSMUST00000148172.1/110821, intron 4 of 4)	-4579	Pcca	chr14	122577888	122578058	171	B3	SINE	B2	120
chr14	122751659	122751796	138	4.79	5.55	3.09	2.45	7.57e-08	2.11e-06	Up	Intron (ENSMUST00000038374.12/110821, intron 19 of 23)	13759	Pcca	chr14	122751618	122751835	218	B3A	SINE	B2	137
chr14	122564969	122565425	457	9.3	10.17	6.79	3.38	9.39e-50	9.31e-47	Up	Intron (ENSMUST00000148172.1/110821, intron 4 of 4)	-17259	Pcca	chr14	122564949	122565366	418	RLTR10C	LTR	ERVK	397
chr14	122834181	122834729	549	10.38	11.25	7.89	3.36	7.78e-56	1.13e-52	Up	Intron (ENSMUST00000038374.12/110821, intron 21 of 23)	-41206	Pcca	chr14	122834135	122834724	590	RLTR10C	LTR	ERVK	543
chr14	122834181	122834729	549	10.38	11.25	7.89	3.36	7.78e-56	1.13e-52	Up	Intron (ENSMUST00000038374.12/110821, intron 21 of 23)	-41206	Pcca	chr14	122834724	122834748	25	RMER19B	LTR	ERVK	5
chr10	58405980	58406209	230	6.04	6.51	5.32	1.2	0.000322	0.00351	Up	Promoter (1-2kb)	-1848	Lims1	chr10	58405905	58406248	344	ORR1E	LTR	ERVL-MaLR	229
chr10	58313014	58313162	149	4.67	5.58	1.68	3.9	5.38e-11	2.41e-09	Up	Distal Intergenic	-10304	Lims1	chr10	58312877	58313023	147	B1_Mm	SINE	Alu	9
chr10	58313014	58313162	149	4.67	5.58	1.68	3.9	5.38e-11	2.41e-09	Up	Distal Intergenic	-10304	Lims1	chr10	58313033	58313225	193	B3	SINE	B2	129
chr2	30450620	30450812	193	5.53	6.23	4.15	2.08	2.14e-08	6.58e-07	Up	Distal Intergenic	4904	Ptpa	chr2	30450601	30450778	178	B3A	SINE	B2	158
chr2	30450620	30450812	193	5.53	6.23	4.15	2.08	2.14e-08	6.58e-07	Up	Distal Intergenic	4904	Ptpa	chr2	30450784	30450887	104	PB1D9	SINE	Alu	28
chr2	30447589	30447718	130	4.79	5.36	3.83	1.53	0.000378	0.00403	Up	Promoter (1-2kb)	1873	Ptpa	.	.	.	.	.	.	.	.
chr2	30448389	30448604	216	5.17	5.8	4.01	1.79	1.96e-06	4.04e-05	Up	Distal Intergenic	2673	Ptpa	.	.	.	.	.	.	.	.
chr8	69033308	69033490	183	7.02	7.75	5.51	2.24	8.24e-15	5.5e-13	Up	Distal Intergenic	42018	Slc18a1	chr8	69033130	69033627	498	RLTR10C	LTR	ERVK	182
chr2	132286292	132286708	417	7.36	8.03	6.08	1.95	1.94e-08	5.99e-07	Up	Promoter (<=1kb)	353	Cds2	chr2	132285829	132286418	590	RLTR17	LTR	ERVK	126
chr2	132286292	132286708	417	7.36	8.03	6.08	1.95	1.94e-08	5.99e-07	Up	Promoter (<=1kb)	353	Cds2	chr2	132286418	132287282	865	RMER3D-int	LTR	ERVK	290
chr2	132286807	132286897	91	4.4	5.03	3.26	1.77	0.000271	0.00303	Up	Promoter (<=1kb)	868	Cds2	chr2	132286418	132287282	865	RMER3D-int	LTR	ERVK	90
chr2	132280643	132280860	218	5.65	6.22	4.67	1.55	9.49e-06	0.000165	Up	Intron (ENSMUST00000110158.7/110911, intron 1 of 3)	-4316	Cds2	.	.	.	.	.	.	.	.
chr1	186991754	186991869	116	4.15	4.79	2.98	1.81	0.00235	0.0179	Up	Distal Intergenic	24338	D1Pas1	.	.	.	.	.	.	.	.
chr1	186990849	186991137	289	4.92	5.43	4.12	1.32	0.00722	0.0427	Up	Distal Intergenic	23433	D1Pas1	chr1	186991039	186991142	104	ID_B1	SINE	B4	98
chr1	186877132	186877376	245	8.37	9.16	6.46	2.7	3.56e-21	4.02e-19	Up	Distal Intergenic	-90040	D1Pas1	chr1	186877033	186877458	426	RLTR10C	LTR	ERVK	244
chr6	82945887	82946022	136	4.88	5.65	3.14	2.51	1.94e-08	5.99e-07	Up	Promoter (<=1kb)	-880	M1ap	chr6	82945843	82945912	70	PB1D7	SINE	Alu	25
chr6	82945887	82946022	136	4.88	5.65	3.14	2.51	1.94e-08	5.99e-07	Up	Promoter (<=1kb)	-880	M1ap	chr6	82945922	82946032	111	B3	SINE	B2	100
chr6	82946800	82946989	190	4.48	5.23	2.82	2.41	8.79e-07	1.97e-05	Up	Promoter (<=1kb)	0	M1ap	.	.	.	.	.	.	.	.
chr7	35563322	35563557	236	6.15	6.51	5.67	0.85	0.00427	0.0286	Up	Distal Intergenic	-7018	Nudt19	chr7	35562562	35563495	934	RMER17B	LTR	ERVK	173
chr6	119818346	119818552	207	8.82	9.66	6.55	3.12	3.39e-39	1.68e-36	Up	Intron (ENSMUST00000183703.7/111173, intron 3 of 20)	6674	Erc1	chr6	119818306	119818650	345	RLTR10C	LTR	ERVK	206
chr6	119811944	119812166	223	5.88	6.36	5.16	1.2	0.000125	0.00157	Up	Intron (ENSMUST00000183703.7/111173, intron 3 of 20)	13060	Erc1	chr6	119811589	119812300	712	RMER6A	LTR	ERVK	222
chr9	115213983	115214347	365	5.96	6.61	4.74	1.87	3.11e-08	9.27e-07	Up	Intron (ENSMUST00000183104.7/74486, intron 7 of 11)	67634	Stmn1-rs1	chr9	115213960	115214139	180	B3A	SINE	B2	156
chr9	115216343	115216483	141	7.15	7.61	6.47	1.14	4.11e-05	0.000599	Up	Intron (ENSMUST00000183104.7/74486, intron 7 of 11)	65498	Stmn1-rs1	.	.	.	.	.	.	.	.
chr13	97847921	97848222	302	7.28	7.67	6.74	0.92	0.000145	0.00178	Up	Distal Intergenic	96809	Eyelinc18	chr13	97848036	97848417	382	IAPLTR1_Mm	LTR	ERVK	186
chr8	124932378	124932660	283	6.07	6.67	5.02	1.65	4.24e-07	1.01e-05	Up	Intron (ENSMUST00000034469.6/112405, intron 1 of 4)	16664	Egln1	chr8	124932356	124932391	36	(CA)n	Simple_repeat	Simple_repeat	13
chr8	124980820	124981071	252	4.75	5.49	3.12	2.38	4.67e-06	8.76e-05	Up	Distal Intergenic	-31496	Egln1	chr8	124980950	124981147	198	B3	SINE	B2	121
chr8	124980154	124980309	156	5.19	6.11	2.03	4.08	1.28e-13	7.69e-12	Up	Distal Intergenic	-30830	Egln1	chr8	124980111	124980326	216	B3	SINE	B2	155
chr12	54167885	54168003	119	4.66	5.55	1.88	3.67	3.61e-10	1.45e-08	Up	Distal Intergenic	35857	Egln3	chr12	54167824	54168037	214	B3	SINE	B2	118
chr12	54126930	54127159	230	7.66	8.37	6.23	2.13	7.88e-18	6.81e-16	Up	Distal Intergenic	76701	Egln3	chr12	54126794	54127221	428	MMERGLN_LTR	LTR	ERV1	229
chr12	54168656	54169108	453	6.59	6.93	6.15	0.78	0.00659	0.0399	Up	Distal Intergenic	34752	Egln3	.	.	.	.	.	.	.	.
chr12	54187286	54187615	330	7.35	8.07	5.86	2.21	3.13e-14	1.98e-12	Up	Intron (ENSMUST00000039516.3/112407, intron 1 of 4)	16245	Egln3	chr12	54187155	54187500	346	MTEb	LTR	ERVL-MaLR	214
chr12	54187753	54188079	327	6.8	7.68	4.09	3.6	2.04e-22	2.51e-20	Up	Intron (ENSMUST00000039516.3/112407, intron 1 of 4)	15781	Egln3	.	.	.	.	.	.	.	.
chr12	54162746	54163156	411	6.47	7.1	5.32	1.78	3.89e-07	9.35e-06	Up	Distal Intergenic	40704	Egln3	.	.	.	.	.	.	.	.
chr7	27710550	27710720	171	4.59	5.38	2.68	2.7	3.14e-06	6.15e-05	Up	Distal Intergenic	18048	Zfp607b	.	.	.	.	.	.	.	.
chr4	53126870	53127130	261	5.24	6.04	3.3	2.73	6.84e-11	3.02e-09	Up	Intron (ENSMUST00000030010.3/11303, intron 5 of 49)	32765	Abca1	.	.	.	.	.	.	.	.
chr4	53127300	53127590	291	5.62	6.47	3.26	3.22	1.25e-16	9.74e-15	Up	Intron (ENSMUST00000030010.3/11303, intron 5 of 49)	32305	Abca1	.	.	.	.	.	.	.	.
chr4	53126593	53126749	157	4.56	5.19	3.43	1.76	0.000516	0.00522	Up	Intron (ENSMUST00000030010.3/11303, intron 5 of 49)	33146	Abca1	chr4	53126554	53126603	50	(TG)n	Simple_repeat	Simple_repeat	10
chr4	53126593	53126749	157	4.56	5.19	3.43	1.76	0.000516	0.00522	Up	Intron (ENSMUST00000030010.3/11303, intron 5 of 49)	33146	Abca1	chr4	53126603	53126717	115	B3A	SINE	B2	114
chr3	122145535	122145706	172	4.79	5.3	3.99	1.31	0.00294	0.0213	Up	Intron (ENSMUST00000013995.12/11304, intron 32 of 49)	13533	Abca4	chr3	122145659	122146185	527	RLTR19	LTR	ERVK	47
chr3	122062960	122063210	251	4.86	5.38	4.02	1.37	0.00149	0.0124	Up	Intron (ENSMUST00000013995.12/11304, intron 5 of 49)	-11244	Abca4	chr3	122063200	122063255	56	(TC)n	Simple_repeat	Simple_repeat	10
chr2	23006283	23006558	276	6.16	6.55	5.63	0.92	0.00173	0.014	Up	Intron (ENSMUST00000126112.7/11308, intron 1 of 9)	33546	Abi1	chr2	23005334	23006341	1008	MLTR25A	LTR	ERVK	58
chr2	23006283	23006558	276	6.16	6.55	5.63	0.92	0.00173	0.014	Up	Intron (ENSMUST00000126112.7/11308, intron 1 of 9)	33546	Abi1	chr2	23006397	23006497	101	Lx8	LINE	L1	100
chr2	23034787	23035031	245	6.87	7.21	6.43	0.78	0.00334	0.0236	Up	Intron (ENSMUST00000126112.7/11308, intron 1 of 9)	5073	Abi1	chr2	23034734	23034900	167	Lx9	LINE	L1	113
chr2	23034787	23035031	245	6.87	7.21	6.43	0.78	0.00334	0.0236	Up	Intron (ENSMUST00000126112.7/11308, intron 1 of 9)	5073	Abi1	chr2	23035011	23035126	116	PB1D7	SINE	Alu	20
chr2	31715982	31716393	412	6.77	7.25	6.05	1.2	1.66e-05	0.000271	Up	Intron (ENSMUST00000075759.12/11350, intron 1 of 10)	26371	Abl1	.	.	.	.	.	.	.	.
chr2	31698365	31698502	138	5.32	5.86	4.42	1.44	0.000155	0.00189	Up	Intron (ENSMUST00000156736.3/11350, intron 2 of 2)	8754	Abl1	chr2	31698336	31698572	237	B3	SINE	B2	137
chr1	156593386	156593637	252	4.91	5.58	3.59	2	6.37e-06	0.000116	Up	Intron (ENSMUST00000173929.7/11352, intron 1 of 2)	-22286	Abl2	.	.	.	.	.	.	.	.
chr1	156565427	156565625	199	5.01	5.54	4.16	1.39	0.000331	0.0036	Up	Intron (ENSMUST00000173929.7/11352, intron 1 of 2)	6378	Abl2	.	.	.	.	.	.	.	.
chr1	156566296	156566453	158	4.99	5.56	4.01	1.55	0.000143	0.00176	Up	Intron (ENSMUST00000173929.7/11352, intron 1 of 2)	7247	Abl2	chr1	156566293	156566466	174	B3	SINE	B2	157
chr1	156631086	156631241	156	5.2	5.83	4.08	1.75	4.5e-06	8.48e-05	Up	Intron (ENSMUST00000166172.8/11352, intron 5 of 12)	15163	Abl2	chr1	156631092	156631254	163	B3	SINE	B2	149
chr1	66847626	66847862	237	5.43	6.18	3.76	2.42	1.14e-10	4.89e-09	Up	Intron (ENSMUST00000027153.5/11363, intron 5 of 10)	10469	Acadl	chr1	66847620	66847833	214	B3	SINE	B2	207
chr6	90008171	90008383	213	7.67	8.49	5.6	2.89	1.77e-22	2.19e-20	Up	Distal Intergenic	-13505	Vmn1r47	chr6	90008031	90008530	500	RLTR10C	LTR	ERVK	212
chr6	90005236	90005519	284	7.46	8.27	5.43	2.85	2.53e-23	3.37e-21	Up	Distal Intergenic	-16369	Vmn1r47	chr6	90005162	90005660	499	RLTR10C	LTR	ERVK	283
chr15	34215685	34216018	334	7.89	8.22	7.47	0.75	0.00164	0.0134	Up	Distal Intergenic	-22010	Laptm4b	.	.	.	.	.	.	.	.
chr15	34190240	34190443	204	4.83	5.52	3.48	2.04	4.91e-06	9.17e-05	Up	Distal Intergenic	-47585	Laptm4b	chr15	34190268	34190436	169	B3	SINE	B2	168
chr15	34245826	34246231	406	5.48	6.17	4.1	2.08	1.52e-05	0.00025	Up	Intron (ENSMUST00000022867.4/114128, intron 1 of 6)	7659	Laptm4b	chr15	34245831	34245868	38	(CACCC)n	Simple_repeat	Simple_repeat	37
chr11	105964868	105965025	158	6.8	7.6	4.84	2.76	7.22e-19	6.74e-17	Up	Downstream (<1kb)	-2920	Ace	chr11	105964839	105965035	197	B3A	SINE	B2	157
chr11	72023749	72023850	102	4.57	5.24	3.28	1.96	0.000186	0.0022	Up	Distal Intergenic	13639	Aipl1	.	.	.	.	.	.	.	.
chr4	123392153	123392488	336	6.76	7.08	6.34	0.75	0.00617	0.038	Up	Promoter (1-2kb)	-1615	Macf1	chr4	123391988	123392308	321	ORR1B1	LTR	ERVL-MaLR	155
chr4	123392153	123392488	336	6.76	7.08	6.34	0.75	0.00617	0.038	Up	Promoter (1-2kb)	-1615	Macf1	chr4	123392309	123392474	166	B2_Mm2	SINE	B2	165
chr4	123392153	123392488	336	6.76	7.08	6.34	0.75	0.00617	0.038	Up	Promoter (1-2kb)	-1615	Macf1	chr4	123392486	123392559	74	ORR1B1	LTR	ERVL-MaLR	2
chr4	123409893	123409995	103	6.25	6.63	5.75	0.88	0.00757	0.0443	Up	Promoter (2-3kb)	2233	Macf1	.	.	.	.	.	.	.	.
chr4	123409168	123409302	135	6.3	6.7	5.73	0.97	0.00397	0.027	Up	Exon (ENSMUST00000125447.2/11426, exon 1 of 6)	2926	Macf1	.	.	.	.	.	.	.	.
chr4	39928456	39928824	369	5.82	6.4	4.85	1.54	4.76e-06	8.9e-05	Up	Distal Intergenic	-214257	Aco1	chr4	39928822	39928848	27	(TG)n	Simple_repeat	Simple_repeat	2
chr4	40160776	40161005	230	5.12	5.87	3.47	2.4	1.1e-08	3.52e-07	Up	Intron (ENSMUST00000102973.3/11428, intron 1 of 20)	-2714	Aco1	chr4	40160670	40161011	342	ORR1D2	LTR	ERVL-MaLR	229
chr13	58496470	58496669	200	5.73	6.15	5.15	1	0.0038	0.0261	Up	Distal Intergenic	61598	Slc28a3	chr13	58496467	58496561	95	MT2B	LTR	ERVL	91
chr13	58556129	58556240	112	5.48	6.05	4.51	1.53	6.43e-05	0.000884	Up	Promoter (2-3kb)	2027	Slc28a3	chr13	58556093	58556289	197	B3	SINE	B2	111
[truncated: 12,239 more rows]

## Sheet: Table S1B
Table S1B: List of down-regulated NPC H3K9me3 ChIP-Seq peaks (cutoff: FDR < 0.05 & Log2FoldChange <= -0.585), with genomic annotation and repeat annotation (overlap >= 50%).
Chromosome	Start	End	Length	Concentration	Concentration_KO	Concentration_WT	Log2FoldChange	Pvalue	FDR	Event	Annotation	DistanceToTSS	Gene_name	Repeat_chromosome	Repeat_start	Repeat_end	Repeat_length	Repeat_name	Repeat_class	Repeat_family	Overlap_length
chr1	4256379	4256844	466	3.60532	2.25134	4.2913	-2.03995	0.00561313	0.0116027	Down	Exon (ENSMUST00000195384.1/ENSMUST00000195384.1, exon 2 of 2)	103470	Rp1	chr1	4256428	4256731	304	(GCCTG)n	Simple_repeat	Simple_repeat	303
chr1	4256379	4256844	466	3.60532	2.25134	4.2913	-2.03995	0.00561313	0.0116027	Down	Exon (ENSMUST00000195384.1/ENSMUST00000195384.1, exon 2 of 2)	103470	Rp1	chr1	4256731	4256867	137	(TCTCTG)n	Simple_repeat	Simple_repeat	113
chr1	4258201	4258597	397	2.20474	0	3.07509	-3.07509	0.00482074	0.0102885	Down	Intron (ENSMUST00000208660.1/19888, intron 8 of 29)	101717	Rp1	chr1	4258358	4258419	62	(TCTCTG)n	Simple_repeat	Simple_repeat	61
chr1	4258201	4258597	397	2.20474	0	3.07509	-3.07509	0.00482074	0.0102885	Down	Intron (ENSMUST00000208660.1/19888, intron 8 of 29)	101717	Rp1	chr1	4258459	4258636	178	(TCTCTG)n	Simple_repeat	Simple_repeat	138
chr1	4567078	4567728	651	2.02255	0	2.887	-2.887	0.00851907	0.0162893	Down	Distal Intergenic	-69724	Sox17	chr1	4567027	4567174	148	IAPEz-int	LTR	ERVK	96
chr1	4567078	4567728	651	2.02255	0	2.887	-2.887	0.00851907	0.0162893	Down	Distal Intergenic	-69724	Sox17	chr1	4567175	4567643	469	IAPLTR2_Mm	LTR	ERVK	468
chr1	4567078	4567728	651	2.02255	0	2.887	-2.887	0.00851907	0.0162893	Down	Distal Intergenic	-69724	Sox17	chr1	4567643	4567796	154	B3	SINE	B2	85
chr1	4788540	4788802	263	3.41823	1.92832	4.13541	-2.20709	0.00130049	0.00394391	Down	Promoter (2-3kb)	-2801	Mrpl15	chr1	4788465	4788947	483	RLTR1B	LTR	ERV1	262
chr1	4866468	4866674	207	1.95507	0.0709671	2.74509	-2.67412	0.0288345	0.0464898	Down	Intron (ENSMUST00000155020.1/18777, intron 7 of 9)	8430	Tcea1	chr1	4866434	4866607	174	B1_Mus2	SINE	Alu	139
chr1	4921737	4922214	478	4.0673	1.24924	4.9612	-3.71196	2.38e-06	0.00010438	Down	Intron (ENSMUST00000002533.14/58175, intron 2 of 4)	63699	Tcea1	chr1	4921631	4922128	498	RLTR1A2_MM	LTR	ERV1	391
chr1	4933029	4933580	552	3.61978	0.952272	4.50152	-3.54925	2.15e-05	0.000371027	Down	Intron (ENSMUST00000002533.14/58175, intron 1 of 4)	74991	Tcea1	chr1	4932693	4933370	678	IAPEY3-int	LTR	ERVK	341
chr1	4933029	4933580	552	3.61978	0.952272	4.50152	-3.54925	2.15e-05	0.000371027	Down	Intron (ENSMUST00000002533.14/58175, intron 1 of 4)	74991	Tcea1	chr1	4933370	4933470	101	RLTR10B2	LTR	ERVK	100
chr1	4933029	4933580	552	3.61978	0.952272	4.50152	-3.54925	2.15e-05	0.000371027	Down	Intron (ENSMUST00000002533.14/58175, intron 1 of 4)	74991	Tcea1	chr1	4933461	4933596	136	RLTR10B2	LTR	ERVK	119
chr1	4947211	4947566	356	3.2929	1.16976	4.11702	-2.94726	0.000217012	0.00135047	Down	Intron (ENSMUST00000002533.14/58175, intron 1 of 4)	71169	Rgs20	chr1	4947148	4950825	3678	L1Md_F3	LINE	L1	355
chr1	4987652	4988294	643	4.80635	0.0709671	5.77902	-5.70805	1.02e-08	2.52e-06	Down	Intron (ENSMUST00000002533.14/58175, intron 1 of 4)	30441	Rgs20	chr1	4987611	4987876	266	MMERVK10C-int	LTR	ERVK	224
chr1	4987652	4988294	643	4.80635	0.0709671	5.77902	-5.70805	1.02e-08	2.52e-06	Down	Intron (ENSMUST00000002533.14/58175, intron 1 of 4)	30441	Rgs20	chr1	4987876	4988183	308	RLTR27	LTR	ERVK	307
chr1	4987652	4988294	643	4.80635	0.0709671	5.77902	-5.70805	1.02e-08	2.52e-06	Down	Intron (ENSMUST00000002533.14/58175, intron 1 of 4)	30441	Rgs20	chr1	4988183	4988317	135	B1_Mm	SINE	Alu	111
chr1	5170299	5170897	599	4.46618	2.16062	5.31234	-3.15172	1.3e-05	0.000285438	Down	Distal Intergenic	87135	Atp6v1h	chr1	5170833	5170902	70	MuRRS4-int	LTR	ERV1	64
chr1	5189168	5189709	542	3.07437	1.38228	3.83184	-2.44956	0.00213076	0.00556789	Down	Distal Intergenic	106004	Atp6v1h	chr1	5189143	5194724	5582	L1Md_T	LINE	L1	541
chr1	5344402	5344636	235	3.15839	1.76519	3.85375	-2.08855	0.00440077	0.00958153	Down	Distal Intergenic	-243857	Oprk1	chr1	5344349	5344521	173	RLTR44B	LTR	ERVK	119
chr1	5820037	5820786	750	3.32003	2.28629	3.91607	-1.62978	0.0193745	0.032981	Down	Distal Intergenic	96612	Npbwr1	chr1	5819993	5825598	5606	L1Md_A	LINE	L1	749
chr1	5917025	5917359	335	2.89578	1.25344	3.64395	-2.3905	0.00457137	0.00987288	Down	Promoter (<=1kb)	39	Npbwr1	.	.	.	.	.	.	.	.
chr1	7060768	7060970	203	2.87138	0.881907	3.67722	-2.79531	0.00182226	0.00496835	Down	Distal Intergenic	-27950	Pcmtd1	chr1	7060539	7060909	371	RLTR44A	LTR	ERVK	141
chr1	7349440	7349826	387	3.80877	1.75309	4.62391	-2.87082	5.51e-05	0.000628242	Down	Exon (ENSMUST00000181554.1/ENSMUST00000181554.1, exon 3 of 3)	188883	Pcmtd1	chr1	7349348	7349688	341	IAPEY3_LTR	LTR	ERVK	248
chr1	7352726	7352985	260	3.04902	0.903966	3.87595	-2.97199	0.000448544	0.00205663	Down	Intron (ENSMUST00000181554.1/ENSMUST00000181554.1, intron 1 of 2)	192169	Pcmtd1	chr1	7352526	7354996	2471	IAPEY3-int	LTR	ERVK	259
chr1	7488055	7488577	523	3.62769	2.30703	4.30544	-1.9984	0.00345673	0.00796633	Down	Distal Intergenic	327498	Pcmtd1	chr1	7482158	7488613	6456	L1Md_A	LINE	L1	522
chr1	7709834	7710294	461	4.28464	3.40179	4.82834	-1.42655	0.0153339	0.0269073	Down	Distal Intergenic	549277	Pcmtd1	chr1	7709866	7710221	356	MMVL30-int	LTR	ERV1	355
chr1	7712809	7713219	411	4.0077	2.76974	4.66399	-1.89425	0.00451537	0.00978116	Down	Distal Intergenic	552252	Pcmtd1	chr1	7710665	7713217	2553	L1Md_F	LINE	L1	408
chr1	8067964	8068201	238	3.06097	1.87919	3.70176	-1.82257	0.0147613	0.0260429	Down	Distal Intergenic	402278	Sntg1	chr1	8067884	8068241	358	IAPEY2_LTR	LTR	ERVK	237
chr1	8248989	8249404	416	3.62288	2.39202	4.27725	-1.88523	0.00702145	0.0138997	Down	Distal Intergenic	221075	Sntg1	chr1	8248951	8253846	4896	L1Md_T	LINE	L1	415
chr1	8787035	8787312	278	2.26467	0.227645	3.07723	-2.84959	0.00780649	0.0151449	Down	Intron (ENSMUST00000132064.7/71096, intron 4 of 19)	16631	Sntg1	chr1	8787020	8787221	202	IAPEz-int	LTR	ERVK	186
chr1	8787035	8787312	278	2.26467	0.227645	3.07723	-2.84959	0.00780649	0.0151449	Down	Intron (ENSMUST00000132064.7/71096, intron 4 of 19)	16631	Sntg1	chr1	8787221	8787272	52	RLTR27	LTR	ERVK	51
chr1	9058172	9058616	445	2.27683	0.192231	3.09588	-2.90364	0.00771707	0.0150185	Down	Intron (ENSMUST00000132064.7/71096, intron 2 of 19)	239620	Sntg1	chr1	9058155	9063553	5399	L1Md_T	LINE	L1	444
chr1	9120768	9121220	453	2.98189	1.19223	3.75652	-2.56429	0.00230468	0.0058962	Down	Intron (ENSMUST00000132064.7/71096, intron 2 of 19)	177016	Sntg1	chr1	9120765	9122478	1714	L1Md_A	LINE	L1	452
chr1	9545528	9546253	726	3.73161	2.45944	4.39697	-1.93753	0.00756086	0.0147542	Down	Promoter (<=1kb)	120	Rrs1	.	.	.	.	.	.	.	.
chr1	9569820	9570032	213	2.78604	0.631761	3.61415	-2.98239	0.00120363	0.00376366	Down	Intron (ENSMUST00000144177.7/76187, intron 13 of 13)	21701	Adhfe1	chr1	9569662	9569991	330	MTC-int	LTR	ERVL-MaLR	171
chr1	9700112	9700841	730	3.93282	2.20117	4.69742	-2.49625	0.00047531	0.00211795	Down	Promoter (<=1kb)	0	Mybl1	chr1	9700214	9700249	36	(CCG)n	Simple_repeat	Simple_repeat	35
chr1	9700112	9700841	730	3.93282	2.20117	4.69742	-2.49625	0.00047531	0.00211795	Down	Promoter (<=1kb)	0	Mybl1	chr1	9700429	9700594	166	G-rich	Low_complexity	Low_complexity	165
chr1	9797866	9798392	527	3.89672	2.27993	4.63996	-2.36003	0.00166681	0.00466077	Down	Promoter (<=1kb)	0	Sgk3	chr1	9798092	9798118	27	(CCCG)n	Simple_repeat	Simple_repeat	26
chr1	9797866	9798392	527	3.89672	2.27993	4.63996	-2.36003	0.00166681	0.00466077	Down	Promoter (<=1kb)	0	Sgk3	chr1	9798160	9798186	27	GC_rich	Low_complexity	Low_complexity	26
chr1	9797866	9798392	527	3.89672	2.27993	4.63996	-2.36003	0.00166681	0.00466077	Down	Promoter (<=1kb)	0	Sgk3	chr1	9798301	9798334	34	GC_rich	Low_complexity	Low_complexity	33
chr1	9943767	9944233	467	3.74356	2.70156	4.34226	-1.6407	0.0195628	0.0332491	Down	Promoter (<=1kb)	0	Snhg6	.	.	.	.	.	.	.	.
chr1	10039635	10040157	523	3.68466	0.881907	4.57739	-3.69548	3.42e-05	0.000479353	Down	Promoter (<=1kb)	0	Cspp1	chr1	10039685	10039741	57	GC_rich	Low_complexity	Low_complexity	56
chr1	10215058	10215208	151	2.0916	0	2.95742	-2.95742	0.00733262	0.0143974	Down	Promoter (<=1kb)	-845	Arfgef1	chr1	10215113	10215179	67	(CCTG)n	Simple_repeat	Simple_repeat	66
chr1	10382722	10383100	379	3.45551	1.75012	4.2154	-2.46528	0.000983495	0.00328117	Down	Intron (ENSMUST00000153695.7/329093, intron 7 of 9)	94723	Cpa6	chr1	10382607	10388112	5506	L1Md_T	LINE	L1	378
chr1	10805280	10805852	573	3.24722	1.93643	3.92249	-1.98606	0.00822824	0.0158217	Down	Exon (ENSMUST00000189483.1/ENSMUST00000189483.1, exon 1 of 1)	-85335	Cpa6	.	.	.	.	.	.	.	.
chr1	11082530	11082745	216	2.52988	0	3.43207	-3.43207	0.00231217	0.00590783	Down	Intron (ENSMUST00000027056.11/109294, intron 5 of 39)	-15785	Prex2	chr1	11082562	11082709	148	B1_Mus2	SINE	Alu	147
chr1	11745862	11746075	214	2.42318	0.192231	3.26071	-3.06847	0.00324816	0.0075843	Down	Intron (ENSMUST00000048613.13/320492, intron 7 of 13)	166556	A830018L16Rik	chr1	11745547	11746110	564	LTRIS2	LTR	ERV1	213
chr1	12269812	12270083	272	2.07536	0	3.07536	-3.07536	0.000124085	0.000988867	Down	Distal Intergenic	-155903	Mir6341	chr1	12263955	12270092	6138	L1Md_F2	LINE	L1	271
chr1	12657451	12657908	458	2.01216	0.155925	2.79776	-2.64183	0.0199928	0.0338892	Down	Distal Intergenic	-9655	Gm17644	.	.	.	.	.	.	.	.
chr1	12996197	12996609	413	2.81845	0.605079	3.65387	-3.04879	0.000889198	0.00306565	Down	Distal Intergenic	-3547	Slco5a1	.	.	.	.	.	.	.	.
chr1	13041680	13041838	159	2.4822	0.514959	3.28481	-2.76985	0.00720907	0.0141977	Down	Distal Intergenic	-49030	Slco5a1	chr1	13041718	13041862	145	B1_Mm	SINE	Alu	120
chr1	13041680	13041838	159	2.4822	0.514959	3.28481	-2.76985	0.00720907	0.0141977	Down	Distal Intergenic	-49030	Slco5a1	chr1	13041649	13041718	70	ORR1D1	LTR	ERVL-MaLR	38
chr1	13472502	13472828	327	3.40578	1.90663	4.12495	-2.21831	0.00166835	0.00466406	Down	Distal Intergenic	-98419	Ncoa2	chr1	13472508	13477835	5328	L1Md_F2	LINE	L1	320
chr1	13514728	13514945	218	2.74884	0	3.66443	-3.66443	0.000653393	0.00254471	Down	Distal Intergenic	64853	Tram1	chr1	13511319	13514997	3679	MuRRS-int	LTR	ERV1	217
chr1	13589229	13590191	963	4.36343	2.37844	5.16862	-2.79018	0.00017051	0.0011823	Down	Promoter (<=1kb)	0	Tram1	chr1	13589396	13589433	38	GC_rich	Low_complexity	Low_complexity	37
chr1	13589229	13590191	963	4.36343	2.37844	5.16862	-2.79018	0.00017051	0.0011823	Down	Promoter (<=1kb)	0	Tram1	chr1	13589465	13589525	61	GC_rich	Low_complexity	Low_complexity	60
chr1	13589229	13590191	963	4.36343	2.37844	5.16862	-2.79018	0.00017051	0.0011823	Down	Promoter (<=1kb)	0	Tram1	chr1	13589897	13589938	42	(A)n	Simple_repeat	Simple_repeat	41
chr1	13605104	13605577	474	3.75102	1.75012	4.5585	-2.80838	7.15e-05	0.00072227	Down	Distal Intergenic	-15194	Tram1	chr1	13605068	13605629	562	RLTR1B	LTR	ERV1	473
chr1	13616764	13616959	196	2.91067	1.23191	3.66569	-2.43378	0.00278139	0.00677083	Down	Distal Intergenic	21452	Lactb2	chr1	13616530	13616951	422	ERVB7_3-LTR_MM	LTR	ERVK	187
chr1	13619275	13619853	579	4.35342	1.73489	5.2309	-3.49601	1.06e-06	6.48e-05	Down	Distal Intergenic	18558	Lactb2	chr1	13616954	13619861	2908	MMERVK9C_I-int	LTR	ERVK	578
chr1	13769610	13769822	213	2.74628	1.3626	3.43938	-2.07678	0.0134712	0.0239946	Down	Distal Intergenic	17057	Gm5523	chr1	13763674	13769817	6144	L1Md_F2	LINE	L1	207
chr1	13820076	13820580	505	3.53534	0.638199	4.43511	-3.79691	3.26e-05	0.000471337	Down	Distal Intergenic	-33197	Gm5523	chr1	13818850	13820562	1713	L1Md_A	LINE	L1	486
chr1	13940827	13941228	402	3.5749	1.15143	4.43375	-3.28232	4.34e-05	0.000554828	Down	Distal Intergenic	-153948	Gm5523	chr1	13940810	13941628	819	RMER17B	LTR	ERVK	401
chr1	14084915	14085686	772	4.29124	2.08926	5.12527	-3.03601	1.56e-05	0.000315753	Down	Distal Intergenic	145806	Eya1	chr1	14084869	14090721	5853	L1Md_T	LINE	L1	771
chr1	14113276	14114127	852	2.06893	0.109446	2.8704	-2.76095	0.0170574	0.0294196	Down	Distal Intergenic	117365	Eya1	chr1	14113239	14119084	5846	L1Md_T	LINE	L1	851
chr1	15529774	15530146	373	3.42876	2.37844	4.03011	-1.65167	0.0122963	0.0222362	Down	Intron (ENSMUST00000175681.2/98741, intron 2 of 2)	217322	Kcnb2	chr1	15527221	15530105	2885	L1Md_F2	LINE	L1	331
chr1	15862069	15862859	791	3.3891	1.45114	4.18737	-2.73623	0.000444003	0.00204373	Down	Intron (ENSMUST00000040695.4/226866, intron 2 of 4)	29863	Sbspon	chr1	15861942	15862372	431	L1VL4	LINE	L1	303
chr1	15862069	15862859	791	3.3891	1.45114	4.18737	-2.73623	0.000444003	0.00204373	Down	Intron (ENSMUST00000040695.4/226866, intron 2 of 4)	29863	Sbspon	chr1	15862372	15862694	323	RLTRETN_Mm	LTR	ERVK	322
chr1	16105247	16105680	434	3.40282	1.60836	4.17827	-2.56991	0.00119067	0.0037366	Down	Promoter (<=1kb)	-94	Rdh10	chr1	16105236	16105334	99	(CGGGG)n	Simple_repeat	Simple_repeat	87
chr1	16105247	16105680	434	3.40282	1.60836	4.17827	-2.56991	0.00119067	0.0037366	Down	Promoter (<=1kb)	-94	Rdh10	chr1	16105243	16105313	71	G-rich	Low_complexity	Low_complexity	66
chr1	16105823	16106178	356	2.85512	0.66428	3.68779	-3.02351	0.00157402	0.0044911	Down	Promoter (<=1kb)	49	Rdh10	.	.	.	.	.	.	.	.
chr1	16452893	16453281	389	3.10766	0.903966	3.9419	-3.03794	0.000354197	0.00179378	Down	Intron (ENSMUST00000162751.7/29819, intron 4 of 13)	65930	Stau2	chr1	16452892	16458491	5600	L1_Mus1	LINE	L1	388
chr1	16474922	16475222	301	3.26088	0.903966	4.11271	-3.20875	0.000122721	0.000986013	Down	Intron (ENSMUST00000162751.7/29819, intron 3 of 13)	43989	Stau2	chr1	16474908	16474990	83	L1VL1	LINE	L1	68
chr1	16474922	16475222	301	3.26088	0.903966	4.11271	-3.20875	0.000122721	0.000986013	Down	Intron (ENSMUST00000162751.7/29819, intron 3 of 13)	43989	Stau2	chr1	16474990	16479563	4574	L1Md_F2	LINE	L1	232
chr1	16619184	16619525	342	3.29366	2.05288	3.95071	-1.89783	0.00810647	0.0156197	Down	Promoter (<=1kb)	0	Ube2w	chr1	16619407	16619438	32	(CGGGG)n	Simple_repeat	Simple_repeat	31
chr1	20773713	20774058	346	2.96177	1.42867	3.68814	-2.25947	0.0037229	0.00842804	Down	Distal Intergenic	5496	Il17f	chr1	20773111	20773922	812	MMERVK9E_I-int	LTR	ERVK	209
chr1	20773713	20774058	346	2.96177	1.42867	3.68814	-2.25947	0.0037229	0.00842804	Down	Distal Intergenic	5496	Il17f	chr1	20773922	20774038	117	ERVB4_1C-LTR_Mm	LTR	ERVK	116
chr1	20935097	20935585	489	3.57131	1.34658	4.40809	-3.06151	0.000373659	0.00185305	Down	Exon (ENSMUST00000189400.6/74229, exon 3 of 3)	12838	Paqr8	.	.	.	.	.	.	.	.
chr1	21360471	21361134	664	4.36272	2.17419	5.1951	-3.02091	5.71e-06	0.000177575	Down	Distal Intergenic	-7197	Khdc1c	chr1	21360379	21360691	313	RLTR27	LTR	ERVK	220
chr1	21360471	21361134	664	4.36272	2.17419	5.1951	-3.02091	5.71e-06	0.000177575	Down	Distal Intergenic	-7197	Khdc1c	chr1	21360691	21360957	267	MMERVK10C-int	LTR	ERVK	266
chr1	21581630	21582197	568	2.58407	0	3.48999	-3.48999	0.00129086	0.0039306	Down	Intron (ENSMUST00000029667.12/226922, intron 2 of 13)	198074	Khdc1b	chr1	21581626	21582103	478	IAPLTR2_Mm	LTR	ERVK	473
chr1	21584575	21585013	439	1.89799	0.109446	2.67244	-2.56299	0.030369	0.0486682	Down	Intron (ENSMUST00000029667.12/226922, intron 2 of 13)	201019	Khdc1b	chr1	21584567	21585044	478	IAPLTR2_Mm	LTR	ERVK	438
chr1	22873834	22874558	725	2.32266	0.236157	3.14196	-2.90581	0.00665057	0.0132991	Down	Distal Intergenic	-67840	Rims1	chr1	22867954	22874570	6617	L1Md_A	LINE	L1	724
chr1	23102001	23102304	304	3.06137	1.39411	3.81425	-2.42014	0.00456178	0.00986099	Down	Promoter (<=1kb)	0	Ppp1r14bl	.	.	.	.	.	.	.	.
chr1	23256098	23256989	892	4.62679	2.8305	5.40254	-2.57204	0.000141737	0.00106327	Down	Exon (ENSMUST00000193885.1/ENSMUST00000193885.1, exon 1 of 1)	-15280	Mir30a	chr1	23256327	23256370	44	GC_rich	Low_complexity	Low_complexity	43
chr1	23256098	23256989	892	4.62679	2.8305	5.40254	-2.57204	0.000141737	0.00106327	Down	Exon (ENSMUST00000193885.1/ENSMUST00000193885.1, exon 1 of 1)	-15280	Mir30a	chr1	23256486	23256578	93	(CA)n	Simple_repeat	Simple_repeat	92
chr1	23786032	23786502	471	1.8181	0	2.73085	-2.73085	0.00495846	0.0105169	Down	Intron (ENSMUST00000144602.1/280645, intron 2 of 2)	24021	B3gat2	chr1	23786104	23786488	385	IAPEY_LTR	LTR	ERVK	384
chr1	24075954	24076409	456	3.03698	0.831143	3.87148	-3.04033	0.000916999	0.00312997	Down	Intron (ENSMUST00000188712.6/68187, intron 2 of 20)	10117	Fam135a	chr1	24075198	24076415	1218	L1Md_T	LINE	L1	455
chr1	24099700	24100338	639	4.11076	2.58474	4.83564	-2.25091	0.00155933	0.00446255	Down	Promoter (<=1kb)	0	Fam135a	chr1	24099858	24099895	38	GC_rich	Low_complexity	Low_complexity	37
chr1	24099700	24100338	639	4.11076	2.58474	4.83564	-2.25091	0.00155933	0.00446255	Down	Promoter (<=1kb)	0	Fam135a	chr1	24100319	24100340	22	GC_rich	Low_complexity	Low_complexity	19
chr1	24420743	24421301	559	3.94781	1.81261	4.77348	-2.96088	6.3e-05	0.000674368	Down	Intron (ENSMUST00000144297.1/12823, intron 2 of 39)	31444	Col19a1	chr1	24420331	24421058	728	IAPEy-int	LTR	ERVK	315
chr1	24420743	24421301	559	3.94781	1.81261	4.77348	-2.96088	6.3e-05	0.000674368	Down	Intron (ENSMUST00000144297.1/12823, intron 2 of 39)	31444	Col19a1	chr1	24421070	24421362	293	IAPEY2_LTR	LTR	ERVK	231
chr1	24558644	24558812	169	2.48377	0.605079	3.27293	-2.66785	0.00544391	0.0113321	Down	Intron (ENSMUST00000115244.8/12823, intron 4 of 50)	28599	Col19a1	chr1	24558686	24558733	48	(CA)n	Simple_repeat	Simple_repeat	47
chr1	24595176	24595439	264	3.07544	0.925692	3.90297	-2.97728	0.000443729	0.00204373	Down	Exon (ENSMUST00000187481.1/ENSMUST00000187481.1, exon 1 of 1)	-7704	Col19a1	.	.	.	.	.	.	.	.
chr1	24645752	24646079	328	2.10381	0.109446	2.91035	-2.80091	0.0132652	0.0236796	Down	Distal Intergenic	-32551	Lmbrd1	chr1	24639746	24646186	6441	L1Md_T	LINE	L1	327
chr1	24721259	24721873	615	1.30392	0	2.18886	-2.18886	0.0298556	0.0479519	Down	Intron (ENSMUST00000191471.6/68421, intron 7 of 15)	-6769	Lmbrd1	chr1	24721309	24722418	1110	L1Md_T	LINE	L1	564
chr1	24804128	24804647	520	3.05432	0	4.02359	-4.02359	4.57e-05	0.000568338	Down	Distal Intergenic	59255	Lmbrd1	chr1	24804003	24804334	332	IAPEY_LTR	LTR	ERVK	206
chr1	24804128	24804647	520	3.05432	0	4.02359	-4.02359	4.57e-05	0.000568338	Down	Distal Intergenic	59255	Lmbrd1	chr1	24804334	24807055	2722	IAPEy-int	LTR	ERVK	313
chr1	26592128	26592468	341	3.2157	1.90129	3.89189	-1.9906	0.00713556	0.0140763	Down	Distal Intergenic	94992	4931408C20Rik	chr1	26591565	26592571	1007	L1Md_F	LINE	L1	340
chr1	27276243	27276565	323	2.78791	0.978371	3.56588	-2.58751	0.00296551	0.00707416	Down	Distal Intergenic	-588783	4931408C20Rik	chr1	27270333	27276738	6406	L1Md_A	LINE	L1	322
chr1	28397946	28398249	304	3.40753	1.58823	4.18711	-2.59888	0.000776004	0.0028024	Down	Distal Intergenic	382003	Gm597	chr1	28397998	28398625	628	MMERVK9C_I-int	LTR	ERVK	251
chr1	29368302	29368868	567	3.78756	2.84197	4.35392	-1.51195	0.0215954	0.0362327	Down	Distal Intergenic	-52620	Mir6342	chr1	29368224	29373823	5600	L1Md_A	LINE	L1	566
chr1	32915846	32916185	340	3.34207	1.90663	4.04717	-2.14054	0.00606238	0.0123295	Down	Distal Intergenic	-368552	Semp2l1	chr1	32909967	32916181	6215	L1Md_A	LINE	L1	335
chr1	33045976	33046563	588	1.66548	0	2.57673	-2.57673	0.00869271	0.0165823	Down	Distal Intergenic	-498682	Semp2l1	chr1	33045964	33051399	5436	L1Md_A	LINE	L1	587
chr1	33162536	33162991	456	3.47926	2.02049	4.1896	-2.16911	0.00313126	0.00738059	Down	Distal Intergenic	459151	Prim2	chr1	33162535	33163531	997	L1Md_F	LINE	L1	455
chr1	33256443	33257026	584	2.26991	0.605079	3.02234	-2.41726	0.0138466	0.0245993	Down	Distal Intergenic	365116	Prim2	chr1	33250641	33257081	6441	L1Md_A	LINE	L1	583
chr1	33305489	33305944	456	2.97982	1.64811	3.66032	-2.01221	0.00916259	0.0173312	Down	Distal Intergenic	316198	Prim2	chr1	33299585	33305964	6380	L1Md_A	LINE	L1	455
chr1	33837819	33838240	422	3.09534	0.0709671	4.00384	-3.93288	0.000173495	0.0011923	Down	Promoter (<=1kb)	440	Gm15455	chr1	33838174	33838251	78	L3b	LINE	CR1	66
chr1	34148174	34148343	170	2.71576	0	3.62189	-3.62189	0.000684421	0.00261697	Down	Intron (ENSMUST00000183034.4/13518, intron 9 of 102)	-11987	Dst	chr1	34148162	34148542	381	RMER15	LTR	ERVL	169
chr1	34403798	34404034	237	2.0052	0.227645	2.77778	-2.55013	0.0209007	0.0351989	Down	Distal Intergenic	29165	Mir5103	chr1	34403899	34404047	149	CT-rich	Low_complexity	Low_complexity	135
chr1	34604917	34605627	711	1.88628	0	2.74273	-2.74273	0.0165594	0.0287149	Down	Distal Intergenic	25260	Amer3	chr1	34604439	34605316	878	RLTR10-int	LTR	ERVK	399
chr1	34604917	34605627	711	1.88628	0	2.74273	-2.74273	0.0165594	0.0287149	Down	Distal Intergenic	25260	Amer3	chr1	34605326	34605727	402	RLTR10	LTR	ERVK	301
chr1	34842526	34843190	665	4.04614	2.58307	4.75744	-2.17437	0.0012055	0.00376673	Down	Promoter (<=1kb)	0	Fam168b	chr1	34842682	34842709	28	GC_rich	Low_complexity	Low_complexity	27
chr1	34842526	34843190	665	4.04614	2.58307	4.75744	-2.17437	0.0012055	0.00376673	Down	Promoter (<=1kb)	0	Fam168b	chr1	34842770	34842797	28	GC_rich	Low_complexity	Low_complexity	27
chr1	34842526	34843190	665	4.04614	2.58307	4.75744	-2.17437	0.0012055	0.00376673	Down	Promoter (<=1kb)	0	Fam168b	chr1	34842946	34842988	43	GC_rich	Low_complexity	Low_complexity	42
chr1	34842526	34843190	665	4.04614	2.58307	4.75744	-2.17437	0.0012055	0.00376673	Down	Promoter (<=1kb)	0	Fam168b	chr1	34843023	34843058	36	GC_rich	Low_complexity	Low_complexity	35
chr1	34929555	34930747	1193	5.52112	4.59494	6.08062	-1.48567	0.00246721	0.00620222	Down	Exon (ENSMUST00000193847.1/ENSMUST00000193847.1, exon 1 of 1)	77718	Plekhb2	.	.	.	.	.	.	.	.
chr1	36259077	36259281	205	2.88747	1.23191	3.63815	-2.40624	0.0027665	0.00674158	Down	Distal Intergenic	14154	Neurl3	chr1	36259154	36259376	223	RMER4B	LTR	ERVK	127
chr1	36495112	36495637	526	3.88071	1.41337	4.74399	-3.33062	2.18e-05	0.000374572	Down	Intron (ENSMUST00000153128.1/94220, intron 1 of 6)	-16230	Cnnm3	chr1	36495163	36495229	67	(GGGTG)n	Simple_repeat	Simple_repeat	66
chr1	36495112	36495637	526	3.88071	1.41337	4.74399	-3.33062	2.18e-05	0.000374572	Down	Intron (ENSMUST00000153128.1/94220, intron 1 of 6)	-16230	Cnnm3	chr1	36495317	36495493	177	(GTGTG)n	Simple_repeat	Simple_repeat	176
chr1	36495112	36495637	526	3.88071	1.41337	4.74399	-3.33062	2.18e-05	0.000374572	Down	Intron (ENSMUST00000153128.1/94220, intron 1 of 6)	-16230	Cnnm3	chr1	36495527	36495676	150	(GTGTG)n	Simple_repeat	Simple_repeat	110
chr1	36644190	36644523	334	3.1719	1.10945	3.98797	-2.87852	0.000492115	0.00215581	Down	Exon (ENSMUST00000170295.7/381337, exon 4 of 15)	38660	Fam178b	.	.	.	.	.	.	.	.
chr1	36682926	36683272	347	3.39607	0.947097	4.25752	-3.31042	0.000134055	0.00102636	Down	Promoter (<=1kb)	0	Fam178b	.	.	.	.	.	.	.	.
chr1	36770855	36771238	384	3.09798	1.07097	3.90915	-2.83818	0.0310022	0.0495182	Down	Promoter (<=1kb)	0	Zap70	.	.	.	.	.	.	.	.
chr1	36957156	36957479	324	1.96853	0	2.82035	-2.82035	0.013554	0.0241224	Down	Distal Intergenic	-13490	Tmem131	chr1	36951188	36957466	6279	L1Md_T	LINE	L1	310
chr1	37223107	37223708	602	3.00239	0	3.93526	-3.93526	0.000202312	0.00129959	Down	Intron (ENSMUST00000191981.5/12790, intron 3 of 4)	3902	Cnga3	chr1	37223153	37223675	523	(CAG)n	Simple_repeat	Simple_repeat	522
chr1	37429928	37430309	382	3.43901	1.43238	4.24731	-2.81493	0.000205403	0.00130974	Down	Promoter (<=1kb)	0	Unc50	.	.	.	.	.	.	.	.
chr1	37954351	37954572	222	2.72395	0	3.64539	-3.64539	0.000890296	0.00306785	Down	Intron (ENSMUST00000027254.9/69541, intron 1 of 5)	3187	Lyg1	chr1	37954191	37954595	405	MTD	LTR	ERVL-MaLR	221
chr1	37997870	37998112	243	2.68095	0.605079	3.49883	-2.89375	0.00261195	0.00646157	Down	Promoter (<=1kb)	0	Eif5b	.	.	.	.	.	.	.	.
chr1	38129125	38130120	996	4.65996	2.66988	5.46589	-2.79601	0.000100847	0.000886105	Down	Promoter (<=1kb)	0	Rev1	chr1	38129753	38129844	92	GC_rich	Low_complexity	Low_complexity	91
chr1	38129125	38130120	996	4.65996	2.66988	5.46589	-2.79601	0.000100847	0.000886105	Down	Promoter (<=1kb)	0	Rev1	chr1	38129970	38130009	40	(CCCCG)n	Simple_repeat	Simple_repeat	39
chr1	38225742	38226035	294	2.72499	0.947097	3.49763	-2.55053	0.00361272	0.0082475	Down	Intron (ENSMUST00000095027.8/16764, intron 10 of 21)	-28299	Aff3	chr1	38225735	38226069	335	IAPLTR2b	LTR	ERVK	293
chr1	38315283	38315586	304	2.29743	0.571182	3.06107	-2.48988	0.012627	0.0227276	Down	Intron (ENSMUST00000095027.8/16764, intron 8 of 21)	-117840	Aff3	.	.	.	.	.	.	.	.
chr1	39081499	39081649	151	2.12503	0	3.06594	-3.06594	0.0014911	0.00433464	Down	Exon (ENSMUST00000195455.1/ENSMUST00000195455.1, exon 1 of 1)	86339	Pdcl3	chr1	39081185	39081616	432	RLTR10C	LTR	ERVK	117
chr1	39085383	39085568	186	2.84604	1.16976	3.6006	-2.43084	0.00380477	0.00857012	Down	Distal Intergenic	90223	Pdcl3	.	.	.	.	.	.	.	.
chr1	39189559	39189802	244	2.64299	0.999014	3.39148	-2.39247	0.0057876	0.0118784	Down	Promoter (2-3kb)	-2567	Mir6349	chr1	39189564	39189766	203	RLTR10C	LTR	ERVK	202
chr1	39258762	39259015	254	3.15453	1.56072	3.89326	-2.33254	0.00257065	0.00638513	Down	Intron (ENSMUST00000173050.7/18143, intron 1 of 2)	64550	Npas2	chr1	39258805	39259235	431	Lx5c	LINE	L1	210
chr1	39397827	39398007	181	2.92668	0.605079	3.77464	-3.16956	0.000682425	0.0026141	Down	Intron (ENSMUST00000054462.10/54610, intron 5 of 19)	-5196	Tbc1d8	.	.	.	.	.	.	.	.
chr1	39577243	39577593	351	4.08444	3.04164	4.6834	-1.64176	0.0168486	0.0291484	Down	Promoter (<=1kb)	0	Rnf149	chr1	39577243	39577290	48	GC_rich	Low_complexity	Low_complexity	47
chr1	39602624	39602923	300	2.94814	0.543344	3.80506	-3.26171	0.000483011	0.00213417	Down	Distal Intergenic	-25219	Rnf149	chr1	39602645	39602718	74	MIRb	SINE	MIR	73
chr1	39671062	39671359	298	3.45402	0.898613	4.32577	-3.42716	5.56e-05	0.000630654	Down	Intron (ENSMUST00000151913.2/619289, intron 13 of 14)	-19588	Creg2	chr1	39671268	39671349	82	MTEa	LTR	ERVL-MaLR	81
chr1	39727908	39728153	246	2.82739	1.74715	3.43814	-1.69099	0.0277016	0.0449529	Down	Distal Intergenic	-6911	Rfx8	chr1	39721941	39728186	6246	L1Md_T	LINE	L1	245
chr1	39756062	39756655	594	1.97996	0	2.97996	-2.97996	0.000213554	0.00134004	Down	Distal Intergenic	-35065	Rfx8	chr1	39756086	39756928	843	(CTGTG)n	Simple_repeat	Simple_repeat	569
chr1	39797607	39798015	409	3.65307	1.59155	4.46901	-2.87746	7.14e-05	0.000722227	Down	Distal Intergenic	7317	Gm3646	chr1	39797502	39797767	266	RLTR14-int	LTR	ERV1	160
chr1	39797607	39798015	409	3.65307	1.59155	4.46901	-2.87746	7.14e-05	0.000722227	Down	Distal Intergenic	7317	Gm3646	chr1	39797767	39798281	515	MURVY-LTR	LTR	ERV1	248
chr1	39915601	39915830	230	2.37684	0	3.32328	-3.32328	0.000686539	0.00261968	Down	Intron (ENSMUST00000163854.8/26921, intron 2 of 30)	14371	Map4k4	chr1	39915455	39915719	265	ORR1B2	LTR	ERVL-MaLR	118
chr1	40195091	40195664	574	2.57647	1.13287	3.28342	-2.15055	0.0166478	0.0288585	Down	Distal Intergenic	-29416	Il1r1	chr1	40195115	40200607	5493	L1Md_T	LINE	L1	549
chr1	40790461	40790770	310	3.33066	2.05288	3.99749	-1.94461	0.0106422	0.0196723	Down	Promoter (<=1kb)	0	Mfsd9	.	.	.	.	.	.	.	.
chr1	41213687	41214017	331	3.47724	1.16976	4.32362	-3.15387	6.99e-05	0.000715627	Down	Distal Intergenic	-32435	4930448I06Rik	chr1	41213591	41214101	511	RLTR1B	LTR	ERV1	330
chr1	41577384	41577615	232	2.68063	0	3.64068	-3.64068	0.000242634	0.0014346	Down	Distal Intergenic	-396132	4930448I06Rik	chr1	41577370	41577566	197	(CAG)n	Simple_repeat	Simple_repeat	182
chr1	43136361	43136981	621	4.28364	1.60836	5.16604	-3.55768	1.18e-06	6.99e-05	Down	Intron (ENSMUST00000008280.13/14200, intron 3 of 5)	26980	Fhl2	chr1	43136527	43136897	371	(GCTG)n	Simple_repeat	Simple_repeat	370
chr1	43164721	43164949	229	2.85461	1.73189	3.47827	-1.74638	0.0280258	0.045411	Down	Promoter (<=1kb)	-760	Fhl2	chr1	43164794	43165109	316	MTEa	LTR	ERVL-MaLR	155
chr1	43316323	43316732	410	3.03909	1.3626	3.79369	-2.43109	0.00218561	0.0056736	Down	Distal Intergenic	-119339	Fhl2	chr1	43316231	43316792	562	RLTR1B	LTR	ERV1	409
chr1	43333453	43333714	262	3.0212	2.05529	3.59462	-1.53934	0.0276349	0.0448726	Down	Distal Intergenic	-110865	Nck2	chr1	43333308	43333799	492	RLTR1A2_MM	LTR	ERV1	261
chr1	43445799	43446225	427	3.50122	1.21436	4.34527	-3.13091	0.000101605	0.000887626	Down	Promoter (<=1kb)	48	Nck2	chr1	43445952	43445982	31	GC_rich	Low_complexity	Low_complexity	30
chr1	43445799	43446225	427	3.50122	1.21436	4.34527	-3.13091	0.000101605	0.000887626	Down	Promoter (<=1kb)	48	Nck2	chr1	43446088	43446109	22	GC_rich	Low_complexity	Low_complexity	21
chr1	43687705	43688227	523	4.41761	2.04297	5.27135	-3.22837	1.25e-06	7.15e-05	Down	Distal Intergenic	-42375	Ecrg4	chr1	43687847	43688775	929	RLTR44-int	LTR	ERVK	380
chr1	43933830	43934424	595	3.90505	2.40566	4.62428	-2.21861	0.00106889	0.00346695	Down	Promoter (<=1kb)	0	Tpp2	.	.	.	.	.	.	.	.
chr1	44102039	44102574	536	3.8048	2.54599	4.46665	-1.92067	0.00751842	0.0146871	Down	Promoter (<=1kb)	0	Tex30	.	.	.	.	.	.	.	.
chr1	44290788	44291056	269	2.56808	1.21005	3.25504	-2.04499	0.0156308	0.0273581	Down	Distal Intergenic	-71827	Mettl21e	chr1	44290704	44291148	445	IAPLTR2_Mm	LTR	ERVK	268
chr1	44295314	44295738	425	2.89375	0.236157	3.77464	-3.53848	0.000501577	0.0021755	Down	Distal Intergenic	-76353	Mettl21e	chr1	44295287	44295755	469	IAPLTR2_Mm	LTR	ERVK	424
chr1	44348544	44349012	469	3.53428	2.03055	4.25444	-2.22389	0.00196761	0.00525019	Down	Distal Intergenic	-129583	Mettl21e	chr1	44348549	44353894	5346	L1Md_T	LINE	L1	463
chr1	44367510	44367746	237	2.13456	0.670575	2.84607	-2.17549	0.0296268	0.0476218	Down	Distal Intergenic	-148549	Mettl21e	chr1	44367545	44368240	696	MMERVK10C-int	LTR	ERVK	201
chr1	44381031	44381360	330	2.44648	0.952272	3.16459	-2.21232	0.0127628	0.0229339	Down	Distal Intergenic	-162070	Mettl21e	chr1	44380826	44381206	381	MMERVK10C-int	LTR	ERVK	175
chr1	44480530	44481913	1384	2.99655	1.43238	3.72932	-2.29694	0.00300617	0.00714299	Down	Distal Intergenic	-69598	Gulp1	chr1	44480455	44486748	6294	L1Md_T	LINE	L1	1383
chr1	44497347	44497664	318	3.21795	0.930945	4.06201	-3.13107	0.000252866	0.00147899	Down	Distal Intergenic	-53847	Gulp1	chr1	44497304	44500000	2697	L1Md_F	LINE	L1	317
chr1	44608040	44609161	1122	3.29265	0.831143	4.15535	-3.32421	0.000161062	0.00114737	Down	Intron (ENSMUST00000074525.9/70676, intron 1 of 10)	55443	Gulp1	chr1	44602097	44609254	7158	L1Md_A	LINE	L1	1121
chr1	44728409	44728850	442	2.77819	1.23616	3.50641	-2.27026	0.00611047	0.0124156	Down	Intron (ENSMUST00000074525.9/70676, intron 3 of 10)	16099	4930521E06Rik	chr1	44722388	44728851	6464	L1Md_T	LINE	L1	441
chr1	45165434	45166351	918	3.71327	2.05529	4.4644	-2.40912	0.000474308	0.00211584	Down	Distal Intergenic	-145187	Col3a1	chr1	45165423	45171251	5829	L1Md_A	LINE	L1	917
chr1	45632200	45632539	340	3.7229	2.04054	4.47857	-2.43803	0.000604325	0.00245428	Down	Distal Intergenic	-128918	Col5a2	chr1	45632172	45632529	358	RLTR10D2	LTR	ERVK	329
chr1	45750113	45750390	278	3.24689	1.16531	4.06553	-2.90023	0.000701401	0.00264766	Down	Distal Intergenic	-44776	Wdr75	chr1	45750187	45750475	289	MMERVK9C_I-int	LTR	ERVK	203
chr1	46383099	46383525	427	2.21022	0.66428	2.93925	-2.27497	0.0266662	0.043506	Down	Distal Intergenic	26479	Dnah7b	chr1	46383103	46384033	931	L1Md_T	LINE	L1	422
chr1	46852766	46853624	859	4.49492	3.36516	5.12066	-1.7555	0.00564192	0.0116492	Down	Promoter (<=1kb)	422	Slc39a10	.	.	.	.	.	.	.	.
chr1	46978858	46979318	461	3.49469	2.57622	4.05141	-1.47519	0.0234554	0.0388673	Down	Distal Intergenic	-86006	Slc39a10	chr1	46974522	46979339	4818	L1Md_F	LINE	L1	460
chr1	51256795	51257471	677	1.95111	0	2.79516	-2.79516	0.0122621	0.0221875	Down	Intron (ENSMUST00000189867.1/442821, intron 3 of 4)	-31655	Cavin2	chr1	51256795	51257471	677	L1Md_A	LINE	L1	676
chr1	51478196	51478606	411	3.75183	1.74715	4.55985	-2.8127	0.000317579	0.00167629	Down	Promoter (<=1kb)	0	Nabp1	.	.	.	.	.	.	.	.
chr1	51683267	51683630	364	2.98805	0.925692	3.80409	-2.8784	0.000683295	0.00261565	Down	Distal Intergenic	80840	Myo1b	chr1	51683245	51683755	511	RLTR1B	LTR	ERV1	363
chr1	51940925	51941277	353	3.04981	0.236157	3.94338	-3.70722	0.00019615	0.00127819	Down	Exon (ENSMUST00000097103.4/ENSMUST00000097103.4, exon 1 of 1)	-24854	Myo1b	.	.	.	.	.	.	.	.
chr1	52399866	52400990	1125	2.07747	0	2.94191	-2.94191	0.0105671	0.0195695	Down	Distal Intergenic	66067	Nab1	chr1	52399920	52405877	5958	L1Md_T	LINE	L1	1070
chr1	52844854	52845031	178	2.29989	0	3.24766	-3.24766	0.00112895	0.00358699	Down	Promoter (<=1kb)	0	Hibch	chr1	52844899	52844929	31	GC_rich	Low_complexity	Low_complexity	30
chr1	53235993	53236312	320	1.75174	0	2.58655	-2.58655	0.0243282	0.0401142	Down	Intron (ENSMUST00000027267.13/227099, intron 5 of 12)	46096	Pms1	chr1	53236015	53236152	138	IAPEz-int	LTR	ERVK	137
chr1	53235993	53236312	320	1.75174	0	2.58655	-2.58655	0.0243282	0.0401142	Down	Intron (ENSMUST00000027267.13/227099, intron 5 of 12)	46096	Pms1	chr1	53236152	53236197	46	RLTR27	LTR	ERVK	45
chr1	53235993	53236312	320	1.75174	0	2.58655	-2.58655	0.0243282	0.0401142	Down	Intron (ENSMUST00000027267.13/227099, intron 5 of 12)	46096	Pms1	chr1	53236223	53236278	56	RLTR27	LTR	ERVK	55
chr1	53283255	53283531	277	2.94812	1.14692	3.7247	-2.57778	0.00203235	0.00537553	Down	Promoter (<=1kb)	-847	Pms1	chr1	53283082	53285355	2274	L1Md_F2	LINE	L1	276
chr1	53296913	53297252	340	3.10985	1.7593	3.79499	-2.03569	0.00691778	0.01373	Down	Promoter (<=1kb)	0	Pms1	.	.	.	.	.	.	.	.
chr1	53352478	53352785	308	2.93916	1.40961	3.66479	-2.25517	0.00505901	0.0106796	Down	Promoter (<=1kb)	0	Gm50478	chr1	53352569	53352592	24	GC_rich	Low_complexity	Low_complexity	23
chr1	53388912	53389282	371	3.32902	1.72253	4.07025	-2.34772	0.00248446	0.00623775	Down	Distal Intergenic	-36160	Asnsd1	chr1	53389000	53389203	204	LSU-rRNA_Hsa	rRNA	rRNA	203
chr1	53389532	53389958	427	3.7989	1.46604	4.6481	-3.18206	3.18e-05	0.000464627	Down	Distal Intergenic	-36780	Asnsd1	chr1	53389269	53389819	551	MMVL30-int	LTR	ERV1	287
chr1	53504639	53505177	539	2.69678	0.514959	3.52833	-3.01338	0.00218203	0.0056712	Down	Intron (ENSMUST00000094964.6/627872, intron 41 of 65)	-151887	Asnsd1	chr1	53504619	53504698	80	Lx9	LINE	L1	59
chr1	53504639	53505177	539	2.69678	0.514959	3.52833	-3.01338	0.00218203	0.0056712	Down	Intron (ENSMUST00000094964.6/627872, intron 41 of 65)	-151887	Asnsd1	chr1	53504698	53505198	501	IAPLTR2_Mm	LTR	ERVK	479
chr1	53613328	53613851	524	4.13803	2.02049	4.96142	-2.94093	4.94e-05	0.00058831	Down	Intron (ENSMUST00000094964.6/627872, intron 19 of 65)	92910	Dnah7a	chr1	53613298	53614788	1491	MMERVK9C_I-int	LTR	ERVK	523
chr1	55052626	55053219	594	4.09521	1.90397	4.92793	-3.02396	0.000102197	0.000889718	Down	Promoter (<=1kb)	0	Coq10b	.	.	.	.	.	.	.	.
chr1	55087464	55088538	1075	4.84647	3.22589	5.59045	-2.36456	0.000324527	0.00170288	Down	Promoter (<=1kb)	0	Hspd1	chr1	55087881	55087928	48	GC_rich	Low_complexity	Low_complexity	47
chr1	55087464	55088538	1075	4.84647	3.22589	5.59045	-2.36456	0.000324527	0.00170288	Down	Promoter (<=1kb)	0	Hspd1	chr1	55087960	55087981	22	GC_rich	Low_complexity	Low_complexity	21
chr1	55162847	55163036	190	2.83607	0.192231	3.71578	-3.52355	0.00043753	0.0020285	Down	Distal Intergenic	31521	Mob4	chr1	55162950	55163017	68	PB1D10	SINE	Alu	67
chr1	55180315	55180467	153	2.52353	0.611637	3.31785	-2.70621	0.00567924	0.0117103	Down	Intron (ENSMUST00000027121.14/74013, intron 8 of 8)	26022	Rftn2	chr1	55180289	55180500	212	B3	SINE	B2	152
chr1	55203774	55203991	218	2.69053	0	3.61008	-3.61008	0.000997033	0.00331444	Down	Promoter (2-3kb)	2498	Rftn2	chr1	55203807	55203836	30	(CAAAC)n	Simple_repeat	Simple_repeat	29
chr1	55298307	55298535	229	2.93648	1.37844	3.668	-2.28955	0.00429318	0.00939688	Down	Promoter (1-2kb)	1643	Boll	chr1	55298398	55298471	74	RLTR44A	LTR	ERVK	73
chr1	55362614	55363672	1059	5.08311	2.89028	5.91603	-3.02574	2.82e-06	0.000115224	Down	Promoter (<=1kb)	0	Boll	chr1	55362783	55362811	29	GC_rich	Low_complexity	Low_complexity	28
chr1	55362614	55363672	1059	5.08311	2.89028	5.91603	-3.02574	2.82e-06	0.000115224	Down	Promoter (<=1kb)	0	Boll	chr1	55363414	55363585	172	(CGG)n	Simple_repeat	Simple_repeat	171
chr1	55540198	55540564	367	2.77174	0	3.73119	-3.73119	0.00012793	0.0010055	Down	Intron (ENSMUST00000042986.9/227120, intron 1 of 5)	134277	Plcl1	chr1	55540230	55540566	337	RLTRETN_Mm	LTR	ERVK	334
chr1	56969612	56969901	290	3.34949	0	4.3199	-4.3199	1.93e-05	0.000349192	Down	Promoter (<=1kb)	0	Satb2	.	.	.	.	.	.	.	.
chr1	57070311	57070808	498	0.997629	0	1.99763	-1.99763	0.0157605	0.0275554	Down	Distal Intergenic	-91661	Satb2	chr1	57069716	57070865	1150	L1Md_T	LINE	L1	497
chr1	57774820	57775255	436	3.70719	2.19899	4.42829	-2.2293	0.00396265	0.00884529	Down	Promoter (<=1kb)	0	Spats2l	chr1	57774815	57774856	42	GC_rich	Low_complexity	Low_complexity	36
chr1	57774820	57775255	436	3.70719	2.19899	4.42829	-2.2293	0.00396265	0.00884529	Down	Promoter (<=1kb)	0	Spats2l	chr1	57774969	57774999	31	GC_rich	Low_complexity	Low_complexity	30
chr1	58364524	58365057	534	3.62096	1.52922	4.44096	-2.91173	0.000181399	0.00121819	Down	Intron (ENSMUST00000114366.2/213043, intron 34 of 35)	-27841	Bzw1	chr1	58364504	58365147	644	RLTR5_Mm	LTR	ERV1	533
chr1	58393220	58393577	358	3.45403	1.77719	4.20869	-2.43149	0.00214618	0.00559694	Down	Promoter (<=1kb)	0	Bzw1	chr1	58393214	58393318	105	(CGCGG)n	Simple_repeat	Simple_repeat	98
chr1	58393220	58393577	358	3.45403	1.77719	4.20869	-2.43149	0.00214618	0.00559694	Down	Promoter (<=1kb)	0	Bzw1	chr1	58393349	58393411	63	GC_rich	Low_complexity	Low_complexity	62
chr1	58393220	58393577	358	3.45403	1.77719	4.20869	-2.43149	0.00214618	0.00559694	Down	Promoter (<=1kb)	0	Bzw1	chr1	58393475	58393520	46	(CCG)n	Simple_repeat	Simple_repeat	45
chr1	58393220	58393577	358	3.45403	1.77719	4.20869	-2.43149	0.00214618	0.00559694	Down	Promoter (<=1kb)	0	Bzw1	chr1	58393545	58393570	26	GC_rich	Low_complexity	Low_complexity	25
chr1	58641974	58642355	382	2.69125	0.192231	3.55764	-3.36541	0.000999249	0.00331914	Down	Distal Intergenic	-10286	Gm20257	chr1	58641194	58646596	5403	MMERGLN-int	LTR	ERV1	381
chr1	58706230	58706621	392	3.1474	0.95743	3.97996	-3.02253	0.000454249	0.00207049	Down	Distal Intergenic	-4887	Cflar	chr1	58705900	58706574	675	IAPEY3-int	LTR	ERVK	344
chr1	58868738	58868960	223	2.975	0.903966	3.79222	-2.88825	0.000750042	0.0027548	Down	Intron (ENSMUST00000188624.1/ENSMUST00000188624.1, intron 6 of 11)	38252	Trak2	chr1	58868697	58869514	818	L1Md_F2	LINE	L1	222
chr1	58884949	58885182	234	2.53595	0.876472	3.28737	-2.41089	0.0108257	0.0199661	Down	Intron (ENSMUST00000188624.1/ENSMUST00000188624.1, intron 3 of 11)	22030	Trak2	chr1	58884941	58885271	331	IAPEY2_LTR	LTR	ERVK	233
chr1	58973235	58973813	579	4.09962	2.41337	4.85602	-2.44265	0.000387747	0.00189546	Down	Promoter (<=1kb)	0	Stradb	.	.	.	.	.	.	.	.
chr1	59236897	59237293	397	3.56827	1.57789	4.37424	-2.79635	0.000305381	0.00164296	Down	Promoter (<=1kb)	0	Als2	.	.	.	.	.	.	.	.
chr1	59345154	59345660	507	2.78944	0	3.78944	-3.78944	4.37e-06	0.000151087	Down	Intron (ENSMUST00000160662.7/271697, intron 13 of 13)	46218	Cdk15	chr1	59345146	59345580	435	IAPLTR2_Mm	LTR	ERVK	426
chr1	59442842	59443184	343	3.04856	0.605079	3.90946	-3.30438	0.000269285	0.00153242	Down	Distal Intergenic	-39240	Fzd7	chr1	59442691	59443175	485	RLTR45	LTR	ERVK	333
chr1	59484025	59484578	554	4.25823	1.76519	5.12405	-3.35885	5.9e-06	0.000180605	Down	Promoter (1-2kb)	1601	Fzd7	.	.	.	.	.	.	.	.
chr1	60180293	60181019	727	4.39482	2.92293	5.10806	-2.18513	0.00181318	0.00494669	Down	Promoter (<=1kb)	0	Nbeal1	chr1	60180529	60180593	65	C-rich	Low_complexity	Low_complexity	64
chr1	60180293	60181019	727	4.39482	2.92293	5.10806	-2.18513	0.00181318	0.00494669	Down	Promoter (<=1kb)	0	Nbeal1	chr1	60180622	60180809	188	(CGGGG)n	Simple_repeat	Simple_repeat	187
chr1	60349565	60349822	258	2.84548	0.183455	3.72676	-3.5433	0.000522119	0.00223559	Down	Intron (ENSMUST00000114202.7/77951, intron 1 of 7)	6242	Cyp20a1	chr1	60347841	60349899	2059	L1VL4	LINE	L1	257
chr1	60350047	60350539	493	3.75663	0.881907	4.65477	-3.77286	6.84e-06	0.000197172	Down	Intron (ENSMUST00000114202.7/77951, intron 1 of 7)	6724	Cyp20a1	chr1	60350075	60350613	539	RLTR1B	LTR	ERV1	464
chr1	60397466	60397850	385	3.36075	2.0796	4.02845	-1.94885	0.00500763	0.0105866	Down	Distal Intergenic	-11769	Abi2	chr1	60397479	60397797	319	RMER1B	Other	Other	318
chr1	60546691	60547263	573	3.89966	1.02429	4.79784	-3.77355	7.33e-06	0.000205185	Down	Intron (ENSMUST00000140485.7/77300, intron 1 of 13)	19502	Raph1	chr1	60546559	60547150	592	RLTR1B-int	LTR	ERV1	459
chr1	60546691	60547263	573	3.89966	1.02429	4.79784	-3.77355	7.33e-06	0.000205185	Down	Intron (ENSMUST00000140485.7/77300, intron 1 of 13)	19502	Raph1	chr1	60547148	60547314	167	RLTR1B-int	LTR	ERV1	115
chr1	61169939	61170334	396	3.1971	0.192231	4.10432	-3.91209	8.36e-05	0.0007914	Down	Distal Intergenic	192012	Icos	chr1	61169933	61170314	382	IAPEY_LTR	LTR	ERVK	375
chr1	61491050	61491266	217	2.44209	0	3.38608	-3.38608	0.000466234	0.00209419	Down	Distal Intergenic	112618	9530026F06Rik	chr1	61491005	61491470	466	RLTR45	LTR	ERVK	216
chr1	61497767	61499517	1751	3.42187	0.876472	4.29269	-3.41621	7.23e-05	0.000728371	Down	Distal Intergenic	119335	9530026F06Rik	chr1	61491786	61499623	7838	L1Md_T	LINE	L1	1750
chr1	61514271	61515345	1075	3.31723	0.543344	4.20771	-3.66436	0.000192635	0.00127004	Down	Distal Intergenic	-123479	Pard3b	chr1	61514244	61520356	6113	L1Md_T	LINE	L1	1074
chr1	62220207	62220474	268	2.66602	0	3.56873	-3.56873	0.00117494	0.00370243	Down	Intron (ENSMUST00000075374.9/72823, intron 13 of 22)	-84098	Pard3bos2	chr1	62220209	62225408	5200	L1Md_T	LINE	L1	265
chr1	62295318	62296326	1009	2.40711	0.550188	3.19282	-2.64263	0.00944514	0.017797	Down	Intron (ENSMUST00000075374.9/72823, intron 16 of 22)	-159209	Pard3bos2	chr1	62295396	62301312	5917	L1Md_T	LINE	L1	930
chr1	62677278	62677715	438	2.49267	1.17419	3.16988	-1.99569	0.0232072	0.0385148	Down	Distal Intergenic	-25570	Nrp2	chr1	62671355	62677568	6214	L1Md_T	LINE	L1	290
chr1	62677278	62677715	438	2.49267	1.17419	3.16988	-1.99569	0.0232072	0.0385148	Down	Distal Intergenic	-25570	Nrp2	chr1	62677600	62677764	165	ORR1F	LTR	ERVL-MaLR	115
chr1	63199965	63200618	654	3.83027	1.70701	4.65441	-2.9474	0.000126054	0.000997394	Down	Promoter (<=1kb)	0	Zdbf2	chr1	63200033	63200167	135	B1_Mus2	SINE	Alu	134
chr1	63272962	63273838	877	4.37846	2.79789	5.11454	-2.31665	0.000728756	0.00271157	Down	Promoter (<=1kb)	0	Zdbf2	chr1	63273133	63273175	43	GC_rich	Low_complexity	Low_complexity	42
chr1	63272962	63273838	877	4.37846	2.79789	5.11454	-2.31665	0.000728756	0.00271157	Down	Promoter (<=1kb)	0	Zdbf2	chr1	63273301	63273322	22	(CTCCG)n	Simple_repeat	Simple_repeat	21
chr1	63272962	63273838	877	4.37846	2.79789	5.11454	-2.31665	0.000728756	0.00271157	Down	Promoter (<=1kb)	0	Zdbf2	chr1	63273328	63273358	31	GC_rich	Low_complexity	Low_complexity	30
chr1	63272962	63273838	877	4.37846	2.79789	5.11454	-2.31665	0.000728756	0.00271157	Down	Promoter (<=1kb)	0	Zdbf2	chr1	63273400	63273446	47	GC_rich	Low_complexity	Low_complexity	46
chr1	63272962	63273838	877	4.37846	2.79789	5.11454	-2.31665	0.000728756	0.00271157	Down	Promoter (<=1kb)	0	Zdbf2	chr1	63273679	63273723	45	GC_rich	Low_complexity	Low_complexity	44
chr1	63309132	63309387	256	2.45681	0.577895	3.246	-2.66811	0.00746378	0.0146042	Down	Exon (ENSMUST00000114132.7/73884, exon 7 of 7)	18394	Zdbf2	chr1	63309183	63309457	275	GC_rich	Low_complexity	Low_complexity	204
chr1	63859131	63859595	465	2.89597	0	3.82067	-3.82067	0.000315884	0.00167237	Down	Distal Intergenic	-89864	4933402D24Rik	chr1	63859130	63864530	5401	L1Md_A	LINE	L1	464
chr1	63927480	63927822	343	3.30539	2.17419	3.93156	-1.75737	0.00988775	0.0184958	Down	Intron (ENSMUST00000120486.2/ENSMUST00000120486.2, intron 5 of 8)	-36905	Gm13749	chr1	63927422	63927579	158	MTC	LTR	ERVL-MaLR	99
chr1	63927480	63927822	343	3.30539	2.17419	3.93156	-1.75737	0.00988775	0.0184958	Down	Intron (ENSMUST00000120486.2/ENSMUST00000120486.2, intron 5 of 8)	-36905	Gm13749	chr1	63927579	63927617	39	(CTTG)n	Simple_repeat	Simple_repeat	38
chr1	63927480	63927822	343	3.30539	2.17419	3.93156	-1.75737	0.00988775	0.0184958	Down	Intron (ENSMUST00000120486.2/ENSMUST00000120486.2, intron 5 of 8)	-36905	Gm13749	chr1	63927617	63927629	13	MTC	LTR	ERVL-MaLR	12
chr1	63927480	63927822	343	3.30539	2.17419	3.93156	-1.75737	0.00988775	0.0184958	Down	Intron (ENSMUST00000120486.2/ENSMUST00000120486.2, intron 5 of 8)	-36905	Gm13749	chr1	63927629	63927801	173	B2_Mm2	SINE	B2	172
chr1	64121640	64122123	484	4.27368	2.69525	5.00933	-2.31409	0.000828063	0.00292305	Down	Promoter (<=1kb)	-149	Klf7	.	.	.	.	.	.	.	.
chr1	64259738	64260064	327	3.30976	0.853985	4.17189	-3.3179	0.0002237	0.00137714	Down	Intron (ENSMUST00000190863.1/ENSMUST00000190863.1, intron 1 of 1)	-137456	Klf7	chr1	64259752	64265023	5272	L1Md_F2	LINE	L1	312
chr1	64532630	64532920	291	3.32677	1.1966	4.15179	-2.9552	0.000558444	0.00233016	Down	Promoter (<=1kb)	0	Creb1	.	.	.	.	.	.	.	.
chr1	64642736	64643216	481	3.42834	1.54677	4.21796	-2.67119	0.000455454	0.0020708	Down	Distal Intergenic	-25494	Mettl21a	chr1	64642710	64642779	70	B4	SINE	B4	43
chr1	64642736	64643216	481	3.42834	1.54677	4.21796	-2.67119	0.000455454	0.0020708	Down	Distal Intergenic	-25494	Mettl21a	chr1	64642779	64643128	350	IAPLTR2a	LTR	ERVK	349
chr1	64642736	64643216	481	3.42834	1.54677	4.21796	-2.67119	0.000455454	0.0020708	Down	Distal Intergenic	-25494	Mettl21a	chr1	64643128	64643246	119	B4	SINE	B4	88
chr1	64690463	64691253	791	4.10877	2.6513	4.81883	-2.16753	0.00275046	0.00671509	Down	Promoter (<=1kb)	0	Ccnyl1	chr1	64690937	64691052	116	G-rich	Low_complexity	Low_complexity	115
chr1	64690463	64691253	791	4.10877	2.6513	4.81883	-2.16753	0.00275046	0.00671509	Down	Promoter (<=1kb)	0	Ccnyl1	chr1	64691221	64691242	22	GC_rich	Low_complexity	Low_complexity	21
chr1	65337287	65337714	428	2.05827	0.192231	2.84543	-2.6532	0.0163537	0.0284207	Down	Intron (ENSMUST00000140190.7/213527, intron 4 of 5)	26030	Pth2r	chr1	65337279	65337637	359	IAPLTR1a_Mm	LTR	ERVK	350
chr1	65337287	65337714	428	2.05827	0.192231	2.84543	-2.6532	0.0163537	0.0284207	Down	Intron (ENSMUST00000140190.7/213527, intron 4 of 5)	26030	Pth2r	chr1	65337649	65337696	48	(CACG)n	Simple_repeat	Simple_repeat	47
chr1	65357418	65357677	260	2.75798	1.15143	3.49923	-2.34779	0.00473276	0.010154	Down	Intron (ENSMUST00000027083.6/213527, intron 8 of 12)	46161	Pth2r	chr1	65357128	65357568	441	RLTR44C	LTR	ERVK	150
chr1	65625755	65626003	249	1.83541	0	2.67208	-2.67208	0.0198302	0.0336532	Down	Distal Intergenic	-300517	Crygf	chr1	65625826	65626247	422	RLTR10C	LTR	ERVK	177
chr1	65814937	65815175	239	2.51693	0.109446	3.37413	-3.26469	0.00270313	0.0066319	Down	Distal Intergenic	-111345	Crygf	chr1	65814884	65815059	176	Lx3C	LINE	L1	122
chr1	66024466	66024815	350	1.85446	0	2.70125	-2.70125	0.0162751	0.0283106	Down	Distal Intergenic	97928	Crygf	chr1	66024487	66024851	365	IAPLTR1_Mm	LTR	ERVK	328
chr1	66276989	66277781	793	2.39293	0	3.28922	-3.28922	0.00272463	0.00666577	Down	Intron (ENSMUST00000156636.8/17756, intron 2 of 4)	25327	Map2	chr1	66271073	66277738	6666	L1Md_T	LINE	L1	749
chr1	66817239	66817942	704	4.26864	1.89298	5.12249	-3.22951	4.83e-05	0.000581725	Down	Promoter (<=1kb)	0	Kansl1l	chr1	66817296	66817326	31	GC_rich	Low_complexity	Low_complexity	30
chr1	66817239	66817942	704	4.26864	1.89298	5.12249	-3.22951	4.83e-05	0.000581725	Down	Promoter (<=1kb)	0	Kansl1l	chr1	66817618	66817639	22	GC_rich	Low_complexity	Low_complexity	21
chr1	66817239	66817942	704	4.26864	1.89298	5.12249	-3.22951	4.83e-05	0.000581725	Down	Promoter (<=1kb)	0	Kansl1l	chr1	66817691	66817715	25	GC_rich	Low_complexity	Low_complexity	24
chr1	66849350	66849694	345	3.21368	0.550188	4.09508	-3.54489	0.000113859	0.000943365	Down	Exon (ENSMUST00000121857.1/ENSMUST00000121857.1, exon 1 of 1)	8637	Acadl	.	.	.	.	.	.	.	.
chr1	66969380	66969535	156	2.56649	0.236157	3.41542	-3.17926	0.00248599	0.00623881	Down	Distal Intergenic	-23996	Myl1	chr1	66966193	66969587	3395	L1Md_F	LINE	L1	155
chr1	67107855	67108218	364	2.9828	0	3.91201	-3.91201	0.000227762	0.0013903	Down	Distal Intergenic	-14808	Cps1	chr1	67107854	67107959	106	IAPEz-int	LTR	ERVK	104
chr1	67107855	67108218	364	2.9828	0	3.91201	-3.91201	0.000227762	0.0013903	Down	Distal Intergenic	-14808	Cps1	chr1	67107943	67107989	47	IAPEz-int	LTR	ERVK	46
chr1	67107855	67108218	364	2.9828	0	3.91201	-3.91201	0.000227762	0.0013903	Down	Distal Intergenic	-14808	Cps1	chr1	67107989	67108088	100	(TCTCG)n	Simple_repeat	Simple_repeat	99
chr1	67107855	67108218	364	2.9828	0	3.91201	-3.91201	0.000227762	0.0013903	Down	Distal Intergenic	-14808	Cps1	chr1	67108088	67108167	80	IAPEz-int	LTR	ERVK	79
chr1	67435491	67435818	328	2.83073	0.577895	3.67084	-3.09294	0.00101746	0.00335831	Down	Distal Intergenic	312465	Cps1	chr1	67435495	67436557	1063	RMER17B	LTR	ERVK	323
chr1	67442041	67442255	215	2.4226	0.876472	3.15167	-2.2752	0.0151434	0.0266197	Down	Distal Intergenic	319015	Cps1	chr1	67442043	67442428	386	IAPEY_LTR	LTR	ERVK	212
chr1	67542714	67543018	305	2.71341	0.696083	3.52323	-2.82715	0.0022582	0.00580986	Down	Distal Intergenic	419688	Cps1	chr1	67536670	67543062	6393	L1Md_A	LINE	L1	304
chr1	67566808	67567001	194	2.5602	0.270522	3.40457	-3.13405	0.00213685	0.00558155	Down	Distal Intergenic	443782	Cps1	chr1	67566886	67567307	422	RLTR10C	LTR	ERVK	115
chr1	67625608	67625812	205	2.55604	0.638199	3.35126	-2.71307	0.00361249	0.0082475	Down	Distal Intergenic	502582	Cps1	chr1	67619666	67625859	6194	L1Md_T	LINE	L1	204
chr1	68405854	68406090	237	2.18164	0	3.18164	-3.18164	8.34e-05	0.000790386	Down	Intron (ENSMUST00000119142.7/13869, intron 3 of 27)	-75638	Erbb4	chr1	68405851	68411056	5206	L1Md_A	LINE	L1	236
chr1	68469012	68469615	604	3.6825	1.97699	4.44241	-2.46542	0.00207588	0.00545516	Down	Intron (ENSMUST00000119142.7/13869, intron 3 of 27)	-138796	Erbb4	chr1	68468958	68474527	5570	L1Md_A	LINE	L1	603
chr1	68598272	68598888	617	3.54487	0.571182	4.44999	-3.87881	3.26e-05	0.000471361	Down	Intron (ENSMUST00000119142.7/13869, intron 2 of 27)	-268056	Erbb4	chr1	68598271	68603866	5596	L1Md_T	LINE	L1	616
chr1	69222643	69222955	313	3.13405	1.6513	3.84967	-2.19838	0.0031543	0.00742509	Down	Distal Intergenic	-114584	Erbb4	chr1	69221201	69223397	2197	MMERVK10D3_I-int	LTR	ERVK	312
chr1	69376954	69378507	1554	5.36751	3.11712	6.20734	-3.09022	4.64e-08	7.64e-06	Down	Exon (ENSMUST00000187740.1/ENSMUST00000187740.1, exon 1 of 1)	-268895	Erbb4	.	.	.	.	.	.	.	.
chr1	69621260	69621751	492	3.81603	2.29873	4.53908	-2.24035	0.000495992	0.00216288	Down	Intron (ENSMUST00000027146.8/22779, intron 3 of 7)	62406	Ikzf2	chr1	69621250	69623705	2456	L1Md_F2	LINE	L1	491
chr1	71516771	71517021	251	3.28187	1.13287	4.10931	-2.97644	0.000224725	0.00138073	Down	Distal Intergenic	-40129	Atic	chr1	71516594	71516897	304	MTE2b	LTR	ERVL-MaLR	126
chr1	72640961	72641377	417	3.27795	0.930945	4.12871	-3.19776	0.000171417	0.0011848	Down	Exon (ENSMUST00000212057.1/ENSMUST00000212057.1, exon 1 of 2)	24439	Smarcal1	.	.	.	.	.	.	.	.
chr1	72711055	72711675	621	3.92872	2.45398	4.64259	-2.18861	0.00315989	0.00743692	Down	Promoter (<=1kb)	0	Rpl37a	.	.	.	.	.	.	.	.
chr1	73110509	73110707	199	1.47763	0	2.3761	-2.3761	0.0166514	0.0288609	Down	Distal Intergenic	85940	1700027A15Rik	chr1	73110474	73110570	97	URR1A	DNA	hAT-Charlie	61
chr1	73110509	73110707	199	1.47763	0	2.3761	-2.3761	0.0166514	0.0288609	Down	Distal Intergenic	85940	1700027A15Rik	chr1	73110570	73110909	340	IAPLTR2b	LTR	ERVK	137
chr1	73167607	73167774	168	3.02175	1.62173	3.7187	-2.09697	0.00463198	0.00997232	Down	Distal Intergenic	143038	1700027A15Rik	chr1	73167430	73167709	280	MTEa	LTR	ERVL-MaLR	102
chr1	73288244	73288643	400	3.41793	1.96538	4.12689	-2.16151	0.00245555	0.00618307	Down	Intron (ENSMUST00000190578.1/ENSMUST00000190578.1, intron 2 of 2)	-110325	D530049I02Rik	chr1	73288318	73291354	3037	MMERVK10D3_I-int	LTR	ERVK	325
chr1	73289280	73289539	260	3.1471	1.62498	3.87116	-2.24618	0.00461492	0.00995207	Down	Intron (ENSMUST00000190578.1/ENSMUST00000190578.1, intron 2 of 2)	-109429	D530049I02Rik	chr1	73288318	73291354	3037	MMERVK10D3_I-int	LTR	ERVK	259
chr1	73323778	73324506	729	1.96681	0	2.90071	-2.90071	0.00323642	0.00756231	Down	Distal Intergenic	-74462	D530049I02Rik	chr1	73323219	73324532	1314	L1Md_T	LINE	L1	728
chr1	73609616	73609834	219	2.71261	0.571182	3.53908	-2.9679	0.00163156	0.00460535	Down	Distal Intergenic	134113	6030407O03Rik	chr1	73609116	73609822	707	RLTR26_Mus	LTR	ERVK	206
chr1	73646937	73647485	549	2.12829	0	2.98482	-2.98482	0.00801952	0.0154683	Down	Intron (ENSMUST00000191114.6/109198, intron 2 of 3)	96462	6030407O03Rik	chr1	73646944	73652316	5373	L1Md_A	LINE	L1	541
chr1	73707733	73707965	233	2.71156	1.48437	3.36494	-1.88057	0.0230508	0.0382992	Down	Intron (ENSMUST00000191114.6/109198, intron 1 of 3)	35982	6030407O03Rik	chr1	73707720	73712885	5166	L1Md_F2	LINE	L1	232
chr1	74236302	74236925	624	4.3969	2.88326	5.11917	-2.23591	0.00269481	0.00661773	Down	Promoter (<=1kb)	0	Arpc2	chr1	74236418	74236543	126	G-rich	Low_complexity	Low_complexity	125
chr1	74236302	74236925	624	4.3969	2.88326	5.11917	-2.23591	0.00269481	0.00661773	Down	Promoter (<=1kb)	0	Arpc2	chr1	74236555	74236579	25	(CGG)n	Simple_repeat	Simple_repeat	24
chr1	74236302	74236925	624	4.3969	2.88326	5.11917	-2.23591	0.00269481	0.00661773	Down	Promoter (<=1kb)	0	Arpc2	chr1	74236670	74236730	61	C-rich	Low_complexity	Low_complexity	60
chr1	74505872	74506763	892	4.28903	2.86876	4.99067	-2.12192	0.0014387	0.00423352	Down	Promoter (<=1kb)	0	Usp37	chr1	74505945	74505968	24	GC_rich	Low_complexity	Low_complexity	23
chr1	74807739	74807964	226	2.93973	0.236157	3.82451	-3.58835	0.000651734	0.00254471	Down	Distal Intergenic	14376	Wnt10a	.	.	.	.	.	.	.	.
chr1	75142574	75143136	563	3.98615	2.16509	4.76602	-2.60094	0.000471642	0.00211019	Down	Promoter (<=1kb)	0	Retreg2	chr1	75142795	75142818	24	GC_rich	Low_complexity	Low_complexity	23
chr1	75142574	75143136	563	3.98615	2.16509	4.76602	-2.60094	0.000471642	0.00211019	Down	Promoter (<=1kb)	0	Retreg2	chr1	75142841	75142901	61	(CGG)n	Simple_repeat	Simple_repeat	60
chr1	77770371	77770582	212	1.47804	0	2.37654	-2.37654	0.0186131	0.0318327	Down	Distal Intergenic	-255283	Epha4	chr1	77770403	77770559	157	(CAGAG)n	Simple_repeat	Simple_repeat	156
chr1	78657620	78658454	835	4.3636	2.9712	5.05876	-2.08756	0.00410955	0.00910063	Down	Promoter (<=1kb)	0	Utp14b	.	.	.	.	.	.	.	.
chr1	78800043	78801260	1218	4.43777	2.99194	5.14523	-2.15328	0.0009352	0.00317958	Down	Intron (ENSMUST00000189296.1/102636764, intron 3 of 3)	-15498	Kcne4	chr1	78800046	78800342	297	L1VL1	LINE	L1	296
chr1	78800043	78801260	1218	4.43777	2.99194	5.14523	-2.15328	0.0009352	0.00317958	Down	Intron (ENSMUST00000189296.1/102636764, intron 3 of 3)	-15498	Kcne4	chr1	78800330	78806238	5909	L1Md_F2	LINE	L1	930
chr1	78821661	78821967	307	3.32128	1.12831	4.15421	-3.0259	0.000239682	0.00142625	Down	Intron (ENSMUST00000186681.1/ENSMUST00000186681.1, intron 1 of 1)	4734	Kcne4	.	.	.	.	.	.	.	.
chr1	78989804	78990394	591	3.46095	2.04297	4.16207	-2.11909	0.00282088	0.00683571	Down	Intron (ENSMUST00000189296.1/102636764, intron 2 of 3)	172877	Kcne4	chr1	78983836	78990422	6587	L1Md_A	LINE	L1	590
chr1	79098524	79099021	498	2.52975	1.12831	3.22704	-2.09873	0.0186619	0.0319034	Down	Intron (ENSMUST00000189296.1/102636764, intron 2 of 3)	125490	Gm29536	chr1	79098413	79103981	5569	L1Md_A	LINE	L1	497
chr1	79281998	79282192	195	2.42437	0.270522	3.25243	-2.98191	0.00584313	0.0119665	Down	Distal Intergenic	-57487	Gm29536	chr1	79277740	79282187	4448	L1Md_T	LINE	L1	189
chr1	79595776	79596050	275	2.87179	1.76519	3.4906	-1.72541	0.0193759	0.032981	Down	Distal Intergenic	75915	Ap1s3	chr1	79595774	79596106	333	IAPEY3_LTR	LTR	ERVK	274
chr1	79614619	79614841	223	3.21996	1.59486	3.96482	-2.36996	0.0016444	0.00462996	Down	Intron (ENSMUST00000162342.7/252903, intron 3 of 4)	57124	Ap1s3	chr1	79614584	79614935	352	ORR1E	LTR	ERVL-MaLR	222
chr1	79911377	79911856	480	3.3699	1.72556	4.11845	-2.39289	0.00122487	0.00380253	Down	Distal Intergenic	-50197	Serpine2	chr1	79911393	79911469	77	Lx7	LINE	L1	76
chr1	79911377	79911856	480	3.3699	1.72556	4.11845	-2.39289	0.00122487	0.00380253	Down	Distal Intergenic	-50197	Serpine2	chr1	79911469	79911834	366	RLTR10B2	LTR	ERVK	365
chr1	79975069	79975394	326	2.99506	1.65448	3.67775	-2.02327	0.00671456	0.0133962	Down	Distal Intergenic	-113889	Serpine2	chr1	79972916	79975420	2505	L1Md_F3	LINE	L1	325
chr1	80141738	80142333	596	4.24942	2.07723	5.07978	-3.00255	1.06e-05	0.000254969	Down	Distal Intergenic	71611	Fam124b	chr1	80141818	80142137	320	IAPEY_LTR	LTR	ERVK	319
chr1	80141738	80142333	596	4.24942	2.07723	5.07978	-3.00255	1.06e-05	0.000254969	Down	Distal Intergenic	71611	Fam124b	chr1	80142137	80142438	302	IAPEy-int	LTR	ERVK	196
chr1	80146410	80146787	378	3.89589	1.93904	4.69698	-2.75793	5.8e-05	0.000643501	Down	Distal Intergenic	67157	Fam124b	chr1	80146482	80146829	348	IAPEY2_LTR	LTR	ERVK	305
chr1	80180212	80180372	161	2.67057	0.543344	3.49522	-2.95187	0.0026384	0.0065087	Down	Distal Intergenic	33572	Fam124b	chr1	80180254	80180430	177	B3A	SINE	B2	118
chr1	80339970	80340446	477	3.28193	1.80663	3.99592	-2.1893	0.00584537	0.0119686	Down	Promoter (<=1kb)	0	Cul3	chr1	80340033	80340100	68	GC_rich	Low_complexity	Low_complexity	67
chr1	80339970	80340446	477	3.28193	1.80663	3.99592	-2.1893	0.00584537	0.0119686	Down	Promoter (<=1kb)	0	Cul3	chr1	80340328	80340362	35	(CGG)n	Simple_repeat	Simple_repeat	34
chr1	80693600	80694322	723	1.93688	0	2.85672	-2.85672	0.00321483	0.00752266	Down	Intron (ENSMUST00000077946.11/210293, intron 1 of 55)	15174	Dock10	chr1	80687749	80694314	6566	L1Md_A	LINE	L1	714
chr1	82287576	82288256	681	4.61464	1.91222	5.49933	-3.58711	3.76e-07	3.4e-05	Down	Exon (ENSMUST00000069799.2/16367, exon 1 of 2)	3160	Irs1	.	.	.	.	.	.	.	.
chr1	82933299	82933507	209	2.96205	1.72253	3.61876	-1.89623	0.0118841	0.0216087	Down	Distal Intergenic	86725	Slc19a3	chr1	82933357	82933893	537	RLTR1A2_MM	LTR	ERV1	150
chr1	82960223	82960675	453	3.97058	2.51416	4.6804	-2.16624	0.0014922	0.00433464	Down	Exon (ENSMUST00000223536.1/ENSMUST00000223536.1, exon 1 of 1)	59557	Slc19a3	chr1	82960288	82960441	154	(CGG)n	Simple_repeat	Simple_repeat	153
chr1	82960223	82960675	453	3.97058	2.51416	4.6804	-2.16624	0.0014922	0.00433464	Down	Exon (ENSMUST00000223536.1/ENSMUST00000223536.1, exon 1 of 1)	59557	Slc19a3	chr1	82960449	82960621	173	(CTG)n	Simple_repeat	Simple_repeat	172
chr1	82960223	82960675	453	3.97058	2.51416	4.6804	-2.16624	0.0014922	0.00433464	Down	Exon (ENSMUST00000223536.1/ENSMUST00000223536.1, exon 1 of 1)	59557	Slc19a3	chr1	82960635	82960695	61	(CTG)n	Simple_repeat	Simple_repeat	40
chr1	83060993	83061374	382	3.3125	1.45114	4.09892	-2.64778	0.000587195	0.00240726	Down	Promoter (<=1kb)	63	Krtap28-13	chr1	83061022	83061190	169	(CGG)n	Simple_repeat	Simple_repeat	168
chr1	83060993	83061374	382	3.3125	1.45114	4.09892	-2.64778	0.000587195	0.00240726	Down	Promoter (<=1kb)	63	Krtap28-13	chr1	83061270	83061336	67	(CTG)n	Simple_repeat	Simple_repeat	66
chr1	83910721	83911073	353	3.1377	0	4.07671	-4.07671	0.000129532	0.0010132	Down	Exon (ENSMUST00000189405.6/ENSMUST00000189405.6, exon 1 of 5)	142180	Pid1	chr1	83910712	83911737	1026	L1Md_F2	LINE	L1	352
chr1	84226023	84226337	315	3.11238	1.44748	3.86482	-2.41734	0.00198199	0.00528098	Down	Intron (ENSMUST00000168574.8/98496, intron 1 of 2)	-7062	Mir6353	chr1	84226029	84227036	1008	RMER17B	LTR	ERVK	308
chr1	85881115	85881585	471	4.44051	1.89028	5.31177	-3.42149	1.1e-06	6.7e-05	Down	Distal Intergenic	-12696	Itm2c	chr1	85875792	85883310	7519	IAPEY3-int	LTR	ERVK	470
chr1	86320144	86320461	318	2.78234	0.192231	3.65728	-3.46505	0.000625862	0.00250164	Down	Distal Intergenic	-16085	Gm28626	chr1	86320064	86320258	195	IAPEz-int	LTR	ERVK	114
chr1	86320144	86320461	318	2.78234	0.192231	3.65728	-3.46505	0.000625862	0.00250164	Down	Distal Intergenic	-16085	Gm28626	chr1	86320258	86320283	26	(TCCCG)n	Simple_repeat	Simple_repeat	25
chr1	86442321	86442623	303	3.60175	2.48893	4.22244	-1.73351	0.0150038	0.0263993	Down	Distal Intergenic	15992	Tex44	chr1	86442590	86442618	29	GC_rich	Low_complexity	Low_complexity	28
chr1	86460862	86461489	628	2.14631	0	3.14631	-3.14631	0.000113047	0.000940231	Down	Distal Intergenic	34533	Tex44	chr1	86460809	86460964	156	(CAAG)n	Simple_repeat	Simple_repeat	102
chr1	86460862	86461489	628	2.14631	0	3.14631	-3.14631	0.000113047	0.000940231	Down	Distal Intergenic	34533	Tex44	chr1	86460970	86461272	303	(CAAG)n	Simple_repeat	Simple_repeat	302
chr1	86460862	86461489	628	2.14631	0	3.14631	-3.14631	0.000113047	0.000940231	Down	Distal Intergenic	34533	Tex44	chr1	86461272	86461391	120	RMER4B	LTR	ERVK	119
chr1	86487265	86487832	568	4.46641	2.82332	5.21473	-2.39141	0.000234612	0.00140702	Down	Distal Intergenic	-38894	Ptma	chr1	86487422	86487470	49	G-rich	Low_complexity	Low_complexity	48
chr1	87213847	87214411	565	3.67742	2.19442	4.39309	-2.19868	0.00182574	0.00497472	Down	Promoter (<=1kb)	0	Eif4e2	chr1	87214077	87214099	23	GC_rich	Low_complexity	Low_complexity	22
chr1	87213847	87214411	565	3.67742	2.19442	4.39309	-2.19868	0.00182574	0.00497472	Down	Promoter (<=1kb)	0	Eif4e2	chr1	87214211	87214256	46	GC_rich	Low_complexity	Low_complexity	45
chr1	87708496	87708830	335	3.44529	1.27052	4.27596	-3.00544	0.000196822	0.00128007	Down	Promoter (<=1kb)	-511	Inpp5d	.	.	.	.	.	.	.	.
chr1	87853116	87853488	373	3.64076	2.30501	4.32227	-2.01726	0.00712145	0.014057	Down	Promoter (<=1kb)	0	Dgkd	chr1	87853207	87853284	78	(CCCCG)n	Simple_repeat	Simple_repeat	77
chr1	87853116	87853488	373	3.64076	2.30501	4.32227	-2.01726	0.00712145	0.014057	Down	Promoter (<=1kb)	0	Dgkd	chr1	87853302	87853332	31	GC_rich	Low_complexity	Low_complexity	30
chr1	87853116	87853488	373	3.64076	2.30501	4.32227	-2.01726	0.00712145	0.014057	Down	Promoter (<=1kb)	0	Dgkd	chr1	87853460	87853489	30	GC_rich	Low_complexity	Low_complexity	28
chr1	88205143	88205942	800	4.33253	1.79487	5.20262	-3.40775	1.01e-05	0.000247951	Down	Promoter (<=1kb)	0	Dnajb3	.	.	.	.	.	.	.	.
chr1	88476811	88477045	235	3.33874	1.56072	4.1114	-2.55068	0.000598828	0.00243805	Down	Distal Intergenic	33021	Glrp1	.	.	.	.	.	.	.	.
chr1	88490196	88490439	244	2.594	0.192231	3.45061	-3.25837	0.00173753	0.004803	Down	Distal Intergenic	19627	Glrp1	chr1	88490250	88490475	226	RMER21B	LTR	ERV1	189
chr1	88803520	88803693	174	2.96521	1.57454	3.65996	-2.08542	0.00699137	0.0138554	Down	Distal Intergenic	48566	Platr5	chr1	88803228	88803823	596	RLTR17	LTR	ERVK	173
chr1	88977357	88977984	628	3.88524	2.06511	4.66497	-2.59986	0.000158594	0.00114074	Down	Distal Intergenic	-38129	1700067G17Rik	chr1	88977414	88977885	472	IAPLTR2_Mm	LTR	ERVK	471
chr1	88977357	88977984	628	3.88524	2.06511	4.66497	-2.59986	0.000158594	0.00114074	Down	Distal Intergenic	-38129	1700067G17Rik	chr1	88977885	88977910	26	MTD	LTR	ERVL-MaLR	25
chr1	89057569	89058000	432	3.61571	1.16976	4.47685	-3.30709	3.26e-05	0.000471337	Down	Distal Intergenic	-12415	Sh3bp4	chr1	89057645	89057806	162	RMER15	LTR	ERVL	161
chr1	89057569	89058000	432	3.61571	1.16976	4.47685	-3.30709	3.26e-05	0.000471337	Down	Distal Intergenic	-12415	Sh3bp4	chr1	89057816	89058023	208	RMER15	LTR	ERVL	184
chr1	89429490	89429796	307	3.53542	0.543344	4.44178	-3.89844	1.74e-05	0.000335483	Down	Distal Intergenic	-23357	C030007H22Rik	chr1	89429471	89429548	78	(CA)n	Simple_repeat	Simple_repeat	58
chr1	89429490	89429796	307	3.53542	0.543344	4.44178	-3.89844	1.74e-05	0.000335483	Down	Distal Intergenic	-23357	C030007H22Rik	chr1	89429548	89429561	14	RSINE1	SINE	B4	13
chr1	89429490	89429796	307	3.53542	0.543344	4.44178	-3.89844	1.74e-05	0.000335483	Down	Distal Intergenic	-23357	C030007H22Rik	chr1	89429564	89429890	327	ORR1D1	LTR	ERVL-MaLR	232
chr1	89592298	89592448	151	2.83326	0	3.79075	-3.79075	0.000108064	0.000918501	Down	Intron (ENSMUST00000027521.14/347722, intron 1 of 17)	12062	Agap1	.	.	.	.	.	.	.	.
chr1	89918918	89919102	185	2.81193	0.925692	3.60228	-2.67659	0.00242003	0.00611269	Down	Distal Intergenic	12077	Gbx2	chr1	89918979	89919232	254	ORR1B2	LTR	ERVL-MaLR	123
chr1	89926846	89927574	729	5.01368	2.38821	5.89177	-3.50356	8.94e-08	1.28e-05	Down	Distal Intergenic	3605	Gbx2	.	.	.	.	.	.	.	.
chr1	89941596	89942259	664	4.91187	1.60508	5.83707	-4.23199	4.31e-09	1.3e-06	Down	Distal Intergenic	-10417	Gbx2	.	.	.	.	.	.	.	.
chr1	90603341	90603660	320	3.36823	1.93095	4.07375	-2.1428	0.00420878	0.00925847	Down	Promoter (<=1kb)	0	Cops8	.	.	.	.	.	.	.	.
chr1	90981584	90981828	245	3.11238	0.543344	3.9854	-3.44205	0.000172642	0.00119124	Down	Distal Intergenic	-11923	Rab17	chr1	90981441	90981788	348	MTEa	LTR	ERVL-MaLR	204
chr1	91020755	91020939	185	3.15701	0.952272	3.99138	-3.03911	0.000278516	0.00156498	Down	Intron (ENSMUST00000189505.6/16978, intron 1 of 12)	21976	Lrrfip1	.	.	.	.	.	.	.	.
chr1	91127968	91128549	582	4.25149	1.62498	5.12967	-3.5047	1.28e-06	7.23e-05	Down	Promoter (2-3kb)	2612	Lrrfip1	.	.	.	.	.	.	.	.
chr1	91145132	91145468	337	2.97783	0.146925	3.87271	-3.72579	0.000370684	0.00184322	Down	Promoter (<=1kb)	29	Rbm44	chr1	91145371	91145442	72	ID4	SINE	ID	71
chr1	91185735	91185912	178	3.18289	2.08926	3.79776	-1.7085	0.0144248	0.0255219	Down	Intron (ENSMUST00000165855.7/51801, intron 1 of 2)	5689	Ramp1	.	.	.	.	.	.	.	.
chr1	91414288	91414458	171	2.7156	0	3.66942	-3.66942	0.000185646	0.00123967	Down	Promoter (<=1kb)	-250	Hes6	chr1	91414383	91414422	40	(TG)n	Simple_repeat	Simple_repeat	39
chr1	91459052	91459353	302	3.11198	1.19223	3.90749	-2.71526	0.00133095	0.00399376	Down	Promoter (<=1kb)	0	Per2	chr1	91459123	91459195	73	(CCGCG)n	Simple_repeat	Simple_repeat	72
chr1	91494523	91494989	467	3.32081	1.10945	4.15598	-3.04654	0.000760924	0.00277258	Down	Promoter (<=1kb)	0	Traf3ip1	.	.	.	.	.	.	.	.
chr1	91893070	91893477	408	3.71944	1.93904	4.49251	-2.55346	0.000471742	0.00211019	Down	Distal Intergenic	41387	Hdac4	.	.	.	.	.	.	.	.
chr1	92122180	92122455	276	2.96523	0.66428	3.81088	-3.1466	0.000439536	0.00203324	Down	Intron (ENSMUST00000097644.8/208727, intron 2 of 26)	-8849	Hdac4	chr1	92122320	92122507	188	B2_Mm2	SINE	B2	135
chr1	92214188	92214600	413	3.57524	1.17419	4.43176	-3.25757	3.69e-05	0.000506645	Down	Distal Intergenic	-18489	Hdac4	.	.	.	.	.	.	.	.
chr1	92215041	92215246	206	2.95572	1.43238	3.68004	-2.24766	0.00543081	0.0113121	Down	Distal Intergenic	-19342	Hdac4	.	.	.	.	.	.	.	.
chr1	92473680	92473974	295	3.19372	1.41712	3.96613	-2.54901	0.00181072	0.00494162	Down	Promoter (<=1kb)	0	Ndufa10	.	.	.	.	.	.	.	.
chr1	92487390	92487657	268	3.21679	2.05288	3.8525	-1.79962	0.0105971	0.0196112	Down	Distal Intergenic	4096	Olfr1415	chr1	92487225	92487580	356	RLTR10D	LTR	ERVK	190
chr1	93111260	93111597	338	1.67716	0	2.59593	-2.59593	0.00784265	0.0152038	Down	Distal Intergenic	-9309	Kif1a	chr1	93111255	93111721	467	IAPLTR2_Mm	LTR	ERVK	337
chr1	93478813	93479268	456	3.82677	2.49975	4.50611	-2.00637	0.00252654	0.00630628	Down	Promoter (<=1kb)	0	Hdlbp	.	.	.	.	.	.	.	.
chr1	93538943	93539177	235	1.9351	0	2.76985	-2.76985	0.014621	0.0258164	Down	Intron (ENSMUST00000120301.7/227377, intron 2 of 26)	26831	Farp2	chr1	93538910	93539057	148	B1_Mm	SINE	Alu	114
chr1	93538943	93539177	235	1.9351	0	2.76985	-2.76985	0.014621	0.0258164	Down	Intron (ENSMUST00000120301.7/227377, intron 2 of 26)	26831	Farp2	chr1	93539091	93539238	148	B1_Mm	SINE	Alu	86
chr1	93571224	93571668	445	3.67931	0.978371	4.56387	-3.5855	1.19e-05	0.000275828	Down	Intron (ENSMUST00000120301.7/227377, intron 8 of 26)	53693	Stk25	chr1	93571181	93571718	538	RLTR1B	LTR	ERV1	444
chr1	93753820	93754081	262	2.56306	0.183455	3.41733	-3.23387	0.00280784	0.00681676	Down	Promoter (<=1kb)	569	Thap4	.	.	.	.	.	.	.	.
chr1	93803979	93804406	428	3.72313	1.91222	4.50132	-2.58911	0.000908925	0.00311429	Down	Promoter (<=1kb)	0	Ing5	chr1	93804056	93804101	46	GC_rich	Low_complexity	Low_complexity	45
chr1	93803979	93804406	428	3.72313	1.91222	4.50132	-2.58911	0.000908925	0.00311429	Down	Promoter (<=1kb)	0	Ing5	chr1	93804207	93804244	38	GC_rich	Low_complexity	Low_complexity	37
chr1	95313567	95314336	770	3.91047	2.84906	4.51534	-1.66628	0.0216436	0.0363043	Down	Promoter (<=1kb)	0	Fam174a	.	.	.	.	.	.	.	.
chr1	97279288	97279746	459	3.59586	2.69679	4.14555	-1.44876	0.0219708	0.0367725	Down	Intron (ENSMUST00000187797.1/ENSMUST00000187797.1, intron 9 of 12)	-150987	Slco6c1	chr1	97279272	97284629	5358	L1Md_A	LINE	L1	458
chr1	98095354	98095976	623	3.87303	2.27787	4.61202	-2.33416	0.00112283	0.00357879	Down	Promoter (<=1kb)	0	Pam	chr1	98095401	98095476	76	(CCCCG)n	Simple_repeat	Simple_repeat	75
chr1	98195067	98195256	190	2.7995	0.638199	3.62849	-2.99029	0.00111929	0.00357267	Down	Distal Intergenic	21419	Gm29461	chr1	98194851	98196068	1218	RMER12	LTR	ERVK	189
chr1	98288021	98288433	413	2.39412	0	3.28528	-3.28528	0.00263907	0.0065091	Down	Distal Intergenic	114373	Gm29461	chr1	98287366	98294955	7590	RLTR6-int	LTR	ERV1	412
chr1	101089152	101089566	415	2.94345	1.63176	3.61895	-1.98719	0.0110649	0.0203007	Down	Distal Intergenic	-66243	Gm20268	chr1	101089087	101089466	380	IAPEY_LTR	LTR	ERVK	314
chr1	101671450	101672109	660	4.03516	3.18664	4.56588	-1.37923	0.0252897	0.0415101	Down	Distal Intergenic	515641	Gm20268	chr1	101665491	101672059	6569	L1Md_F2	LINE	L1	609
chr1	101671450	101672109	660	4.03516	3.18664	4.56588	-1.37923	0.0252897	0.0415101	Down	Distal Intergenic	515641	Gm20268	chr1	101672047	101672149	103	L1VL1	LINE	L1	62
chr1	102265850	102266156	307	3.14796	1.21436	3.94558	-2.73121	0.0007013	0.00264766	Down	Distal Intergenic	1110041	Gm20268	chr1	102265922	102266113	192	MMERVK9C_I-int	LTR	ERVK	191
chr1	104098084	104098263	180	2.95433	1.89298	3.55918	-1.6662	0.0244104	0.0402294	Down	Distal Intergenic	-670266	Cdh20	chr1	104098015	104103235	5221	L1Md_F2	LINE	L1	179
chr1	104835702	104836087	386	1.72348	0	2.63833	-2.63833	0.00636064	0.0128215	Down	Intron (ENSMUST00000062528.8/23836, intron 1 of 11)	67173	Cdh20	chr1	104835771	104836090	320	ERVB7_1-LTR_MM	LTR	ERVK	316
chr1	105026998	105027295	298	3.17386	2.0454	3.79922	-1.75383	0.0132822	0.0237068	Down	Distal Intergenic	258469	Cdh20	chr1	105021025	105027382	6358	L1Md_F2	LINE	L1	297
chr1	105539396	105539626	231	3.00565	1.1966	3.78354	-2.58694	0.00152158	0.00439415	Down	Intron (ENSMUST00000188743.1/ENSMUST00000188743.1, intron 1 of 5)	29322	Pign	chr1	105533442	105539640	6199	L1Md_F3	LINE	L1	230
chr1	105568047	105568387	341	0.872867	0	1.87287	-1.87287	0.0228899	0.0380611	Down	Promoter (<=1kb)	561	Pign	chr1	105567977	105573406	5430	L1Md_T	LINE	L1	340
chr1	105762890	105763459	570	3.9495	2.22102	4.71354	-2.49252	0.000150981	0.00110814	Down	Distal Intergenic	-17259	Tnfrsf11a	chr1	105762954	105763305	352	MMERVK10D3_LTR	LTR	ERVK	351
chr1	105762890	105763459	570	3.9495	2.22102	4.71354	-2.49252	0.000150981	0.00110814	Down	Distal Intergenic	-17259	Tnfrsf11a	chr1	105763313	105763565	253	ORR1A4	LTR	ERVL-MaLR	146
chr1	105990296	105990709	414	3.41423	1.62173	4.18935	-2.56762	0.000667909	0.00257947	Down	Promoter (<=1kb)	0	Zcchc2	chr1	105990623	105990686	64	GC_rich	Low_complexity	Low_complexity	63
chr1	105998484	105998815	332	2.85114	0.881907	3.65405	-2.77214	0.00145065	0.00425673	Down	Intron (ENSMUST00000118196.7/227449, intron 1 of 13)	-5307	Zcchc2	.	.	.	.	.	.	.	.
chr1	106119008	106119649	642	3.722	0.903966	4.6159	-3.71194	3.08e-05	0.000455249	Down	Distal Intergenic	51875	Gm20753	chr1	106112984	106119665	6682	L1Md_T	LINE	L1	641
chr1	106299612	106300730	1119	1.97467	0.155925	2.75417	-2.59824	0.0268048	0.0437047	Down	Intron (ENSMUST00000061047.6/98432, intron 3 of 16)	-16508	Phlpp1	chr1	106293755	106300742	6988	L1Md_A	LINE	L1	1118
chr1	106714426	106714703	278	3.31539	1.60508	4.07617	-2.47109	0.00182905	0.00497954	Down	Promoter (<=1kb)	-152	Bcl2	chr1	106714438	106714531	94	GC_rich	Low_complexity	Low_complexity	93
chr1	106802582	106802734	153	2.51534	0.577895	3.31354	-2.73564	0.00435688	0.00950592	Down	Distal Intergenic	-5854	Vps4b	chr1	106802492	106802849	358	IAPEY2_LTR	LTR	ERVK	152
chr1	111094250	111094629	380	3.23267	1.88191	3.91787	-2.03596	0.00536737	0.0112015	Down	Distal Intergenic	-116666	Cdh19	chr1	111094408	111094766	359	MMERVK10D3_I-int	LTR	ERVK	221
chr1	114123862	114124258	397	3.48816	2.54677	4.05305	-1.50628	0.023933	0.0395579	Down	Distal Intergenic	-1560498	Cntnap5a	chr1	114123761	114124428	668	L1_Mus3	LINE	L1	396
chr1	118465423	118465635	213	2.67034	0.146925	3.53908	-3.39215	0.00101297	0.00334688	Down	Intron (ENSMUST00000049404.12/76707, intron 6 of 39)	-4136	Clasp1	.	.	.	.	.	.	.	.
chr1	118980191	118980558	368	3.67138	1.77719	4.46297	-2.68578	0.000127827	0.0010053	Down	Promoter (2-3kb)	2030	Gli2	chr1	118980372	118980693	322	MTE2b	LTR	ERVL-MaLR	186
chr1	119161181	119161382	202	2.9547	0.881907	3.77216	-2.89025	0.000793443	0.0028441	Down	Distal Intergenic	-107562	Gli2	chr1	119160971	119161285	315	B4	SINE	B4	104
chr1	119161181	119161382	202	2.9547	0.881907	3.77216	-2.89025	0.000793443	0.0028441	Down	Distal Intergenic	-107562	Gli2	chr1	119161296	119161388	93	B4A	SINE	B4	86
chr1	119178528	119179221	694	3.60777	0.952272	4.48848	-3.53621	1.74e-05	0.000335483	Down	Distal Intergenic	-124909	Gli2	chr1	119178549	119178729	181	(CAA)n	Simple_repeat	Simple_repeat	180
chr1	119178528	119179221	694	3.60777	0.952272	4.48848	-3.53621	1.74e-05	0.000335483	Down	Distal Intergenic	-124909	Gli2	chr1	119178729	119178849	121	(CAG)n	Simple_repeat	Simple_repeat	120
chr1	119178528	119179221	694	3.60777	0.952272	4.48848	-3.53621	1.74e-05	0.000335483	Down	Distal Intergenic	-124909	Gli2	chr1	119178852	119179032	181	(CAA)n	Simple_repeat	Simple_repeat	180
chr1	119178528	119179221	694	3.60777	0.952272	4.48848	-3.53621	1.74e-05	0.000335483	Down	Distal Intergenic	-124909	Gli2	chr1	119179035	119179253	219	B4	SINE	B4	186
chr1	119526234	119527154	921	4.80917	2.21672	5.68432	-3.4676	1.47e-06	7.77e-05	Down	Promoter (<=1kb)	74	Tmem185b	.	.	.	.	.	.	.	.
chr1	119582304	119582584	281	3.08962	0.66428	3.94866	-3.28438	0.000215569	0.00134646	Down	Intron (ENSMUST00000052404.12/226352, intron 16 of 24)	16656	Epb41l5	chr1	119582242	119582748	507	RLTR1B	LTR	ERV1	280
chr1	119836805	119837703	899	4.09883	2.2967	4.87557	-2.57887	0.000288476	0.00159885	Down	Promoter (<=1kb)	0	Ptpn4	chr1	119837392	119837468	77	(TCC)n	Simple_repeat	Simple_repeat	76
chr1	119850055	119850241	187	2.32292	0	3.20391	-3.20391	0.00290067	0.00696803	Down	Distal Intergenic	-12442	Ptpn4	chr1	119850056	119850126	71	ID_B1	SINE	B4	70
chr1	119850055	119850241	187	2.32292	0	3.20391	-3.20391	0.00290067	0.00696803	Down	Distal Intergenic	-12442	Ptpn4	chr1	119850126	119850150	25	B1F	SINE	Alu	24
chr1	120140057	120140361	305	3.03976	1.21436	3.82035	-2.60599	0.00130406	0.00394585	Down	Intron (ENSMUST00000027637.12/73103, intron 1 of 4)	-10238	3110009E18Rik	chr1	120140209	120140361	153	Tigger17c	DNA	TcMar-Tigger	152
chr1	120264952	120265348	397	3.33218	1.75309	4.06796	-2.31487	0.00246056	0.00618971	Down	Promoter (<=1kb)	0	Steap3	.	.	.	.	.	.	.	.
chr1	120604792	120605268	477	4.50706	3.18214	5.18588	-2.00374	0.00105501	0.00344381	Down	Promoter (2-3kb)	2374	En1	.	.	.	.	.	.	.	.
chr1	121178019	121178240	222	3.30745	0.155925	4.2239	-4.06797	5.16e-05	0.000599351	Down	Exon (ENSMUST00000185678.1/98452, exon 3 of 3)	90490	Celrr	.	.	.	.	.	.	.	.
chr1	121527425	121527724	300	3.11678	1.37844	3.88256	-2.50412	0.00131864	0.0039724	Down	Promoter (<=1kb)	741	Htr5b	.	.	.	.	.	.	.	.
chr1	125435173	125435987	815	4.29751	2.93238	4.98618	-2.0538	0.00419866	0.00924208	Down	Promoter (<=1kb)	0	Actr3	chr1	125435432	125435457	26	(GGGA)n	Simple_repeat	Simple_repeat	25
chr1	125435173	125435987	815	4.29751	2.93238	4.98618	-2.0538	0.00419866	0.00924208	Down	Promoter (<=1kb)	0	Actr3	chr1	125435543	125435658	116	C-rich	Low_complexity	Low_complexity	115
chr1	126592842	126593353	512	3.73398	0.227645	4.66906	-4.44142	5.51e-06	0.000174106	Down	Intron (ENSMUST00000094609.9/210356, intron 2 of 12)	-99915	Nckap5	chr1	126592759	126593094	336	MTEa	LTR	ERVL-MaLR	252
chr1	126669576	126670162	587	2.0996	0.109446	2.90554	-2.79609	0.0129991	0.0232813	Down	Intron (ENSMUST00000094609.9/210356, intron 2 of 12)	68028	Nckap5	chr1	126663689	126670162	6474	L1Md_T	LINE	L1	586
chr1	126814793	126814988	196	2.45049	0.903966	3.17965	-2.27568	0.0126473	0.0227577	Down	Intron (ENSMUST00000094609.9/210356, intron 1 of 12)	15493	Nckap5	chr1	126814599	126815114	516	MT2A	LTR	ERVL	195
chr1	126980245	126980560	316	2.63379	0.577895	3.44895	-2.87106	0.00269029	0.00661037	Down	Distal Intergenic	-149446	Nckap5	chr1	126980129	126980429	301	IAPLTR2b	LTR	ERVK	184
chr1	126980245	126980560	316	2.63379	0.577895	3.44895	-2.87106	0.00269029	0.00661037	Down	Distal Intergenic	-149446	Nckap5	chr1	126980443	126980550	108	IAPEz-int	LTR	ERVK	107
chr1	127053668	127053862	195	3.01229	1.23191	3.78535	-2.55344	0.00139053	0.0041259	Down	Distal Intergenic	-151153	Mgat5	chr1	127053709	127054130	422	RLTR10C	LTR	ERVK	153
chr1	127773848	127774352	505	3.93595	2.28629	4.68551	-2.39922	0.00293726	0.00702539	Down	Promoter (<=1kb)	0	2900009J06Rik	.	.	.	.	.	.	.	.
chr1	128088970	128089842	873	3.59093	0.571182	4.49912	-3.92794	1.47e-05	0.000305469	Down	Exon (ENSMUST00000194969.1/ENSMUST00000194969.1, exon 1 of 1)	12612	Zranb3	chr1	128087162	128089561	2400	IAPEy-int	LTR	ERVK	591
chr1	128088970	128089842	873	3.59093	0.571182	4.49912	-3.92794	1.47e-05	0.000305469	Down	Exon (ENSMUST00000194969.1/ENSMUST00000194969.1, exon 1 of 1)	12612	Zranb3	chr1	128089561	128089944	384	IAPEY_LTR	LTR	ERVK	281
chr1	128103315	128103854	540	3.53559	2.42291	4.15624	-1.73333	0.0159999	0.0279215	Down	Promoter (<=1kb)	0	R3hdm1	.	.	.	.	.	.	.	.
chr1	128376701	128376971	271	3.30239	1.19223	4.12482	-2.93259	0.00023433	0.00140598	Down	Promoter (2-3kb)	2516	Dars	chr1	128376769	128376911	143	B1_Mm	SINE	Alu	142
chr1	128773219	128773707	489	1.88522	0.146925	2.65099	-2.50407	0.030253	0.0485002	Down	Exon (ENSMUST00000181951.1/ENSMUST00000181951.1, exon 1 of 2)	-180926	Cxcr4	chr1	128773220	128778688	5469	L1Md_T	LINE	L1	487
chr1	128888111	128888520	410	2.44485	0.859506	3.18189	-2.32239	0.0148005	0.0260979	Down	Distal Intergenic	-295818	Cxcr4	chr1	128888074	128888399	326	IAPLTR2b	LTR	ERVK	288
chr1	130599966	130601401	1436	3.59041	2.31107	4.25764	-1.94657	0.00572609	0.0117781	Down	Intron (ENSMUST00000039862.10/22789, intron 4 of 11)	28211	Zp3r	chr1	130599900	130602005	2106	L1Md_T	LINE	L1	1435
chr1	130685944	130686156	213	2.22172	0.577895	2.97018	-2.39228	0.0167937	0.0290766	Down	Promoter (1-2kb)	-1873	C4bp-ps1	chr1	130685888	130686234	347	IAPEY2_LTR	LTR	ERVK	212
chr1	131526568	131527484	917	4.48422	3.30703	5.12372	-1.81668	0.00430965	0.0094283	Down	Promoter (<=1kb)	0	Srgap2	.	.	.	.	.	.	.	.
chr1	131819327	131819532	206	2.94598	1.39791	3.67545	-2.27754	0.00476878	0.010206	Down	3' UTR	7159	Pm20d1	.	.	.	.	.	.	.	.
chr1	131827868	131828351	484	3.40775	1.81545	4.14618	-2.33073	0.00204593	0.00540029	Down	Promoter (<=1kb)	0	Slc41a1	.	.	.	.	.	.	.	.
chr1	132007535	132008282	748	4.02401	3.0047	4.61535	-1.61065	0.0159772	0.0278932	Down	Promoter (<=1kb)	0	Elk4	.	.	.	.	.	.	.	.
chr1	132165947	132166327	381	3.18699	1.46604	3.94968	-2.48364	0.00113821	0.00360765	Down	Distal Intergenic	-25104	Lemd1	chr1	132165983	132166200	218	B3	SINE	B2	217
chr1	132219209	132219587	379	3.09388	1.90397	3.73697	-1.833	0.00967077	0.0181479	Down	Intron (ENSMUST00000188169.6/213409, intron 1 of 4)	-6727	Lemd1	chr1	132219172	132219310	139	B1_Mus1	SINE	Alu	101
chr1	132219209	132219587	379	3.09388	1.90397	3.73697	-1.833	0.00967077	0.0181479	Down	Intron (ENSMUST00000188169.6/213409, intron 1 of 4)	-6727	Lemd1	chr1	132219310	132219473	164	ORR1A4	LTR	ERVL-MaLR	163
chr1	132397625	132397926	302	3.09142	0.881907	3.92636	-3.04446	0.000369807	0.00184055	Down	Distal Intergenic	-6344	Tmcc2	chr1	132397642	132397801	160	B4A	SINE	B4	159
chr1	132397625	132397926	302	3.09142	0.881907	3.92636	-3.04446	0.000369807	0.00184055	Down	Distal Intergenic	-6344	Tmcc2	chr1	132397890	132397949	60	ORR1A3	LTR	ERVL-MaLR	36
chr1	132880283	132880494	212	3.11499	1.76813	3.79922	-2.03109	0.00792884	0.0153411	Down	Promoter (<=1kb)	0	Lrrn2	chr1	132880391	132880422	32	GC_rich	Low_complexity	Low_complexity	31
chr1	133131029	133131911	883	4.32988	3.03921	5.00003	-1.96082	0.00231511	0.00591068	Down	Promoter (<=1kb)	0	Ppp1r15b	.	.	.	.	.	.	.	.
chr1	133148236	133148542	307	2.9487	0	3.87549	-3.87549	0.000344604	0.00176353	Down	Distal Intergenic	-15668	Plekha6	chr1	133148424	133148622	199	B3	SINE	B2	118
chr1	133423399	133423727	329	3.31841	2.13059	3.96091	-1.83032	0.014549	0.0257139	Down	Promoter (<=1kb)	650	Sox13	.	.	.	.	.	.	.	.
chr1	133578098	133578454	357	2.98321	1.39791	3.72025	-2.32233	0.00270844	0.00663806	Down	Distal Intergenic	31471	Snrpe	.	.	.	.	.	.	.	.
chr1	133885963	133886192	230	2.94035	1.63176	3.61507	-1.98331	0.0181472	0.0311176	Down	Distal Intergenic	15135	Optc	chr1	133886037	133886080	44	(CCG)n	Simple_repeat	Simple_repeat	43
chr1	134119318	134119691	374	3.74361	0	4.72308	-4.72308	4.22e-06	0.000147399	Down	Intron (ENSMUST00000159963.7/71884, intron 1 of 11)	8076	Chit1	chr1	134119308	134119644	337	(CAGG)n	Simple_repeat	Simple_repeat	326
chr1	134361547	134361807	261	3.12432	1.59155	3.85061	-2.25906	0.0056949	0.0117307	Down	Promoter (<=1kb)	0	Tmem183a	chr1	134361675	134361770	96	(CCCCG)n	Simple_repeat	Simple_repeat	95
chr1	134385241	134385429	189	2.77882	0	3.74154	-3.74154	0.000122365	0.000984367	Down	Promoter (<=1kb)	-511	Mgat4f	chr1	134385120	134385484	365	ORR1D1	LTR	ERVL-MaLR	188
chr1	134455273	134455722	450	4.02527	2.62999	4.72111	-2.09112	0.00157799	0.0044947	Down	Promoter (<=1kb)	0	Klhl12	.	.	.	.	.	.	.	.
chr1	134533803	134534245	443	3.32516	1.59486	4.08951	-2.49465	0.000702231	0.00264925	Down	Distal Intergenic	12705	Mgat4e	chr1	134533708	134534218	511	RLTR1B	LTR	ERV1	415
chr1	134799166	134799901	736	4.35616	0.155925	5.31638	-5.16045	4.28e-07	3.74e-05	Down	Exon (ENSMUST00000192808.1/ENSMUST00000192808.1, exon 1 of 1)	3950	Ppp1r12b	chr1	134799161	134799835	675	(CAGG)n	Simple_repeat	Simple_repeat	669
chr1	134799166	134799901	736	4.35616	0.155925	5.31638	-5.16045	4.28e-07	3.74e-05	Down	Exon (ENSMUST00000192808.1/ENSMUST00000192808.1, exon 1 of 1)	3950	Ppp1r12b	chr1	134799861	134799892	32	(TTTTG)n	Simple_repeat	Simple_repeat	31
chr1	134953050	134953363	314	2.95146	0.605079	3.80215	-3.19707	0.000539628	0.0022835	Down	Promoter (2-3kb)	2488	Ppp1r12b	chr1	134953032	134953069	38	RSINE1	SINE	B4	19
chr1	134953050	134953363	314	2.95146	0.605079	3.80215	-3.19707	0.000539628	0.0022835	Down	Promoter (2-3kb)	2488	Ppp1r12b	chr1	134953069	134953328	260	(CCTG)n	Simple_repeat	Simple_repeat	259
chr1	135160915	135161580	666	4.7852	2.47803	5.63155	-3.15352	2.2e-06	0.000101433	Down	Exon (ENSMUST00000027682.8/171469, exon 2 of 2)	6101	Gpr37l1	chr1	135161017	135161038	22	(CAG)n	Simple_repeat	Simple_repeat	21
chr1	135374940	135375276	337	3.37906	1.78909	4.11702	-2.32793	0.00176163	0.00484775	Down	Promoter (<=1kb)	0	Shisa4	chr1	135374927	135374959	33	GC_rich	Low_complexity	Low_complexity	19
chr1	135414879	135415038	160	2.31451	0	3.19924	-3.19924	0.00389464	0.0087227	Down	Intron (ENSMUST00000041023.13/226432, intron 4 of 23)	5004	Ipo9	chr1	135414872	135414892	21	MT2B	LTR	ERVL	13
chr1	135414879	135415038	160	2.31451	0	3.19924	-3.19924	0.00389464	0.0087227	Down	Intron (ENSMUST00000041023.13/226432, intron 4 of 23)	5004	Ipo9	chr1	135414892	135414972	81	B1_Mus2	SINE	Alu	80
chr1	135414879	135415038	160	2.31451	0	3.19924	-3.19924	0.00389464	0.0087227	Down	Intron (ENSMUST00000041023.13/226432, intron 4 of 23)	5004	Ipo9	chr1	135414972	135414991	20	MT2B	LTR	ERVL	19
chr1	135483286	135483602	317	3.18658	0.638199	4.05768	-3.41948	0.000111684	0.000933467	Down	Intron (ENSMUST00000040599.14/215690, intron 3 of 29)	-15613	Nav1	chr1	135483149	135483442	294	MTEb	LTR	ERVL-MaLR	156
chr1	135483286	135483602	317	3.18658	0.638199	4.05768	-3.41948	0.000111684	0.000933467	Down	Intron (ENSMUST00000040599.14/215690, intron 3 of 29)	-15613	Nav1	chr1	135483442	135483525	84	PB1D7	SINE	Alu	83
chr1	135904448	135904666	219	1.52987	0	2.43207	-2.43207	0.0137569	0.0244588	Down	Intron (ENSMUST00000027667.12/18772, intron 2 of 13)	14454	Pkp1	chr1	135904458	135904571	114	(CAGAGA)n	Simple_repeat	Simple_repeat	113
chr1	136502968	136503179	212	2.81795	0	3.77498	-3.77498	0.000142505	0.00106647	Down	Intron (ENSMUST00000201676.3/381293, intron 18 of 27)	26628	Kif14	chr1	136502954	136503029	76	tRNA-Ala-GCY_	tRNA	tRNA	61
chr1	136502968	136503179	212	2.81795	0	3.77498	-3.77498	0.000142505	0.00106647	Down	Intron (ENSMUST00000201676.3/381293, intron 18 of 27)	26628	Kif14	chr1	136503054	136503253	200	B3	SINE	B2	125
chr1	136762105	136762454	350	3.01341	0.898613	3.83644	-2.93783	0.000701639	0.00264779	Down	Distal Intergenic	65894	Platr22	.	.	.	.	.	.	.	.
chr1	138227432	138227615	184	2.99185	0	3.95975	-3.95975	7.5e-05	0.000741127	Down	Distal Intergenic	-46123	Atp6v1g3	chr1	138226513	138228147	1635	IAPLTR4_I	LTR	ERVK	183
[truncated: 9,556 more rows]

## Sheet: Table S1C
Table S1C: List of DMR in NPC WGBS (cutoff: CpG_number >= 3 & absolute MeanDiff >= 0.1), with genomic annotation and repeat annotation (overlap >= 50%).
[truncated: 46,139 more rows]

[truncated: 3 more sheets: Table S1D, Table S1E, Table S1F]
