# Supplementary material for: Epigenetic Modulation of Short Interspersed Nuclear Elements Activity Influences Neural Precursor Cell Proliferation
Source: Research Square preprint supplement (doi:10.21203/rs.3.rs-3647230/v1), 2023-12-08
Supplement: Supplementary file 2 [file a61eac4d62c8f13c72ed1db7.docx]

Supplementary Figures

**Title:** Epigenetic Modulation of Short Interspersed Nuclear Elements Activity Influences Neural Precursor Cell Proliferation

**Journal:** *Nature Communications*

**Authors:** Dai-jing Sun1†, Yue-yan Zhu1†, Wen-zhu Peng1†, Jie Weng1, Shu-long Dong2, Jia-qi Li1, Qi Chen1,Chuan-hui Ge1, Li-yong Liao1, Yu-hao Dong1, Yun Liu2, Wei-da Meng2*, Yan Jiang1*

*1Institutes of Brain Science, State Key Laboratory of Medical Neurobiology and MOE Frontiers Center for Brain Science, Fudan University, 200032, Shanghai, China.*

*2The MOE Key Laboratory of Metabolism and Molecular Medicine, Department of Biochemistry and Molecular Biology, School of Basic Medical Sciences, Fudan University, 200032, Shanghai, China.*

†D.S., Y.Z. and W.P. contributed equally to this work

*W.M. and Y.J. are co-senior authors

**Correspondence:** Yan Jiang, [yan_jiang@fudan.edu.cn](mailto:yan_jiang@fudan.edu.cn)


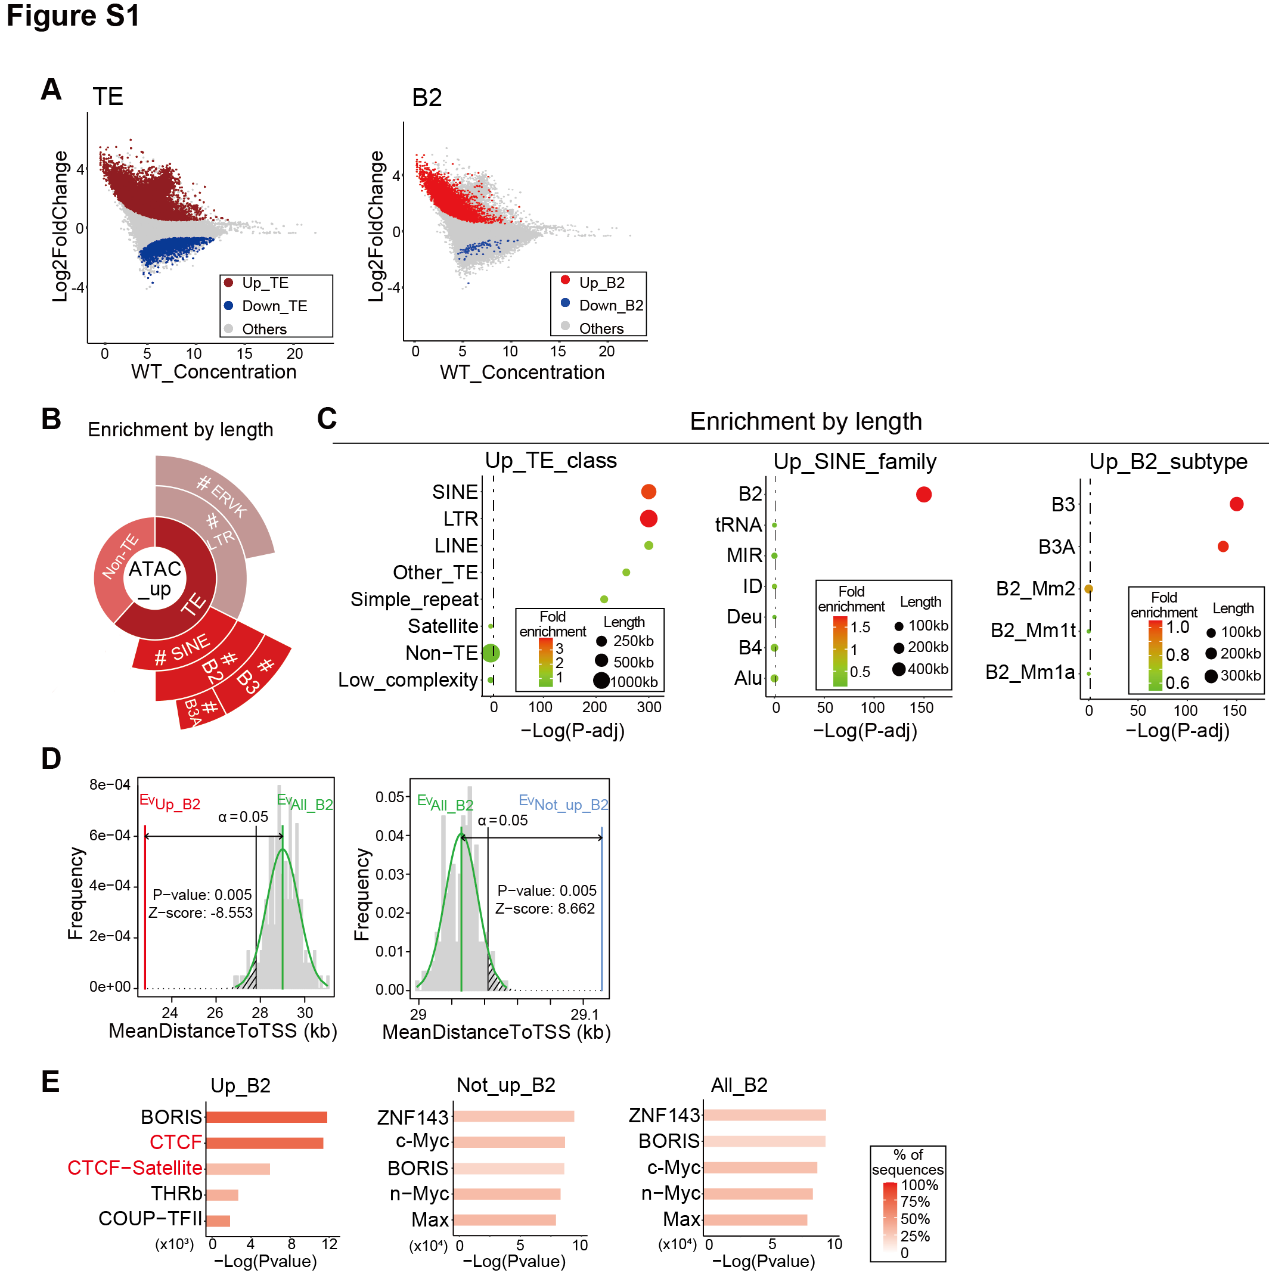


**Fig. S1: SETDB1 selectively inhibited the chromatin accessibility on SINE_B2 elements. (A)** MA plots of differential ATAC-seq peaks annotated as TE (left) and SINE_B2 (right). Cutoff for significance: FDR < 0.05, Log2FoldChange >= 0.585 (red, up) or <= -0.585 (blue, down), overlapping >= 50%. **(B)** Annotation enrichment of up-regulated ATAC-seq peaks (ATAC_up) by accumulative length. **(C)** “TE_class” (left), “SINE_family” (middle) and “B2_subtype” (right) annotation enrichment of ATAC_up by accumulative length. Fisher’s exact test, B-H adjusted, #: P-adj. < 0.0001.Dotted linesindicate P-adj. = 0.05. **(D)** Mean distance to transcription start site (TSS) from B2 overlapping ATAC_up (Up_B2, red) or B2 not overlapping ATAC_up (Not_up_B2, blue). Permutation tests were conducted against all B2 loci (All_B2, green). **(E)** Top 5 enriched Homer known motifs of Up_B2, Not_up_B2 and All_B2. Note CTCF and CTCF-Satellite were only enriched in Up_B2.


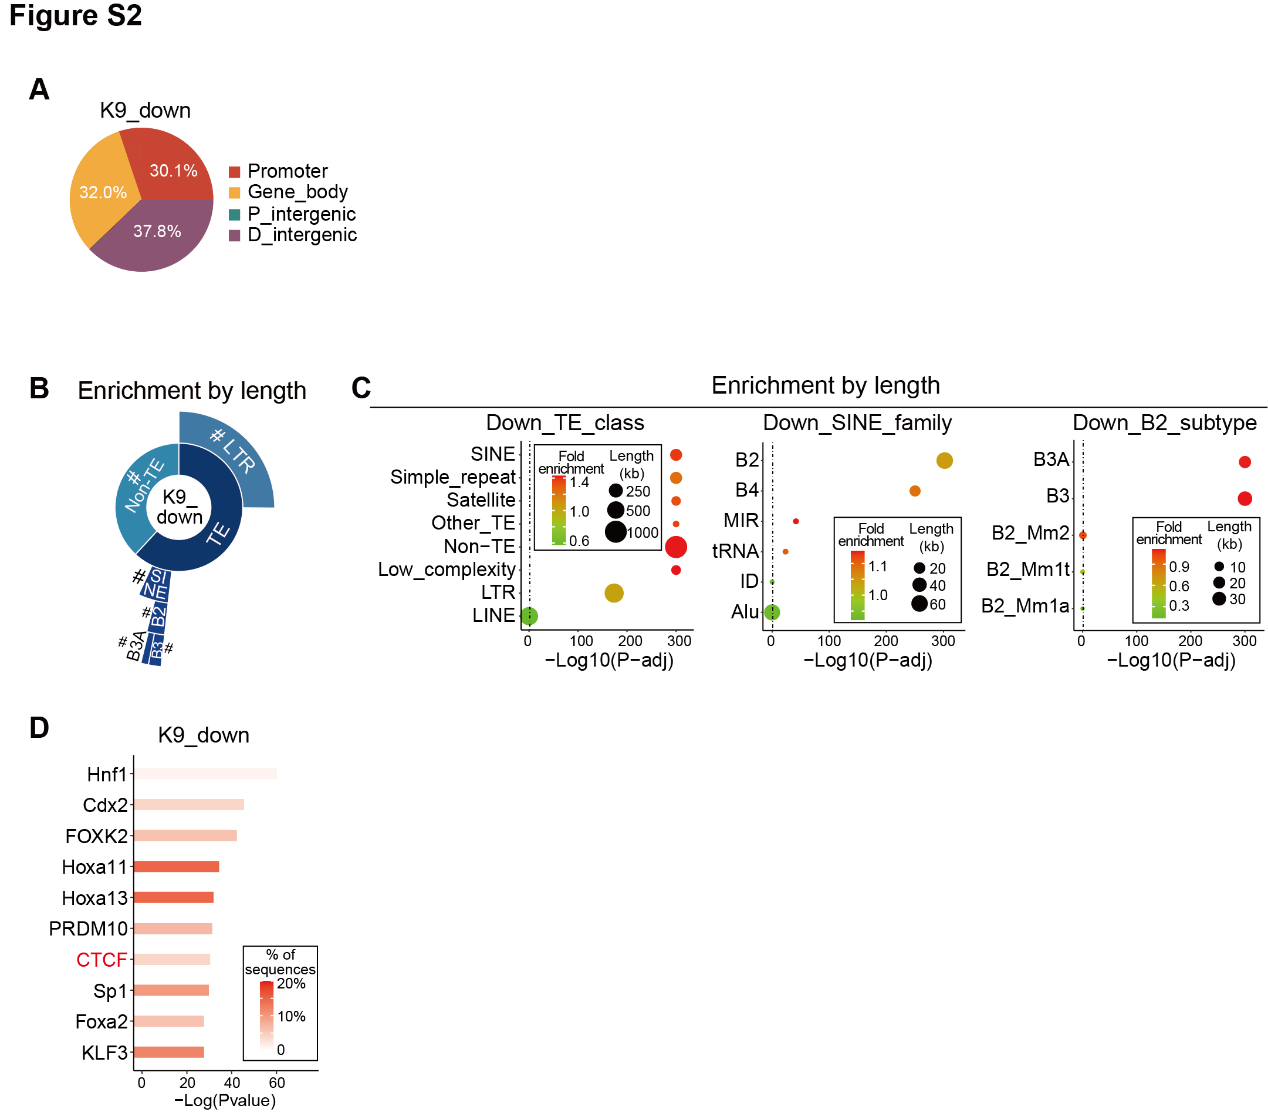


**Fig. S2: SETDB1 suppressed chromatin accessibility of SINE_B2 via H3K9me3 deposition**. **(A)** Genomic distribution of down-regulated H3K9me3 ChIP-seq peaks (“K9_down”). P_intergenic, proximal intergenic. D_intergenic, distal intergenic. **(B)** Annotation enrichment of K9_down by accumulative length. **(C)** “TE_class” (left), “SINE_family” (middle) and “B2_subtype” (right) annotation enrichment of K9_down by accumulative length. Fisher’s exact test, B-H adjusted, #: P-adj. < 0.0001. Dotted linesindicate P-adj. = 0.05. **(D)** Top 10 enriched Homer known motifs of K9_down. Note CTCF motif was significantly enriched.


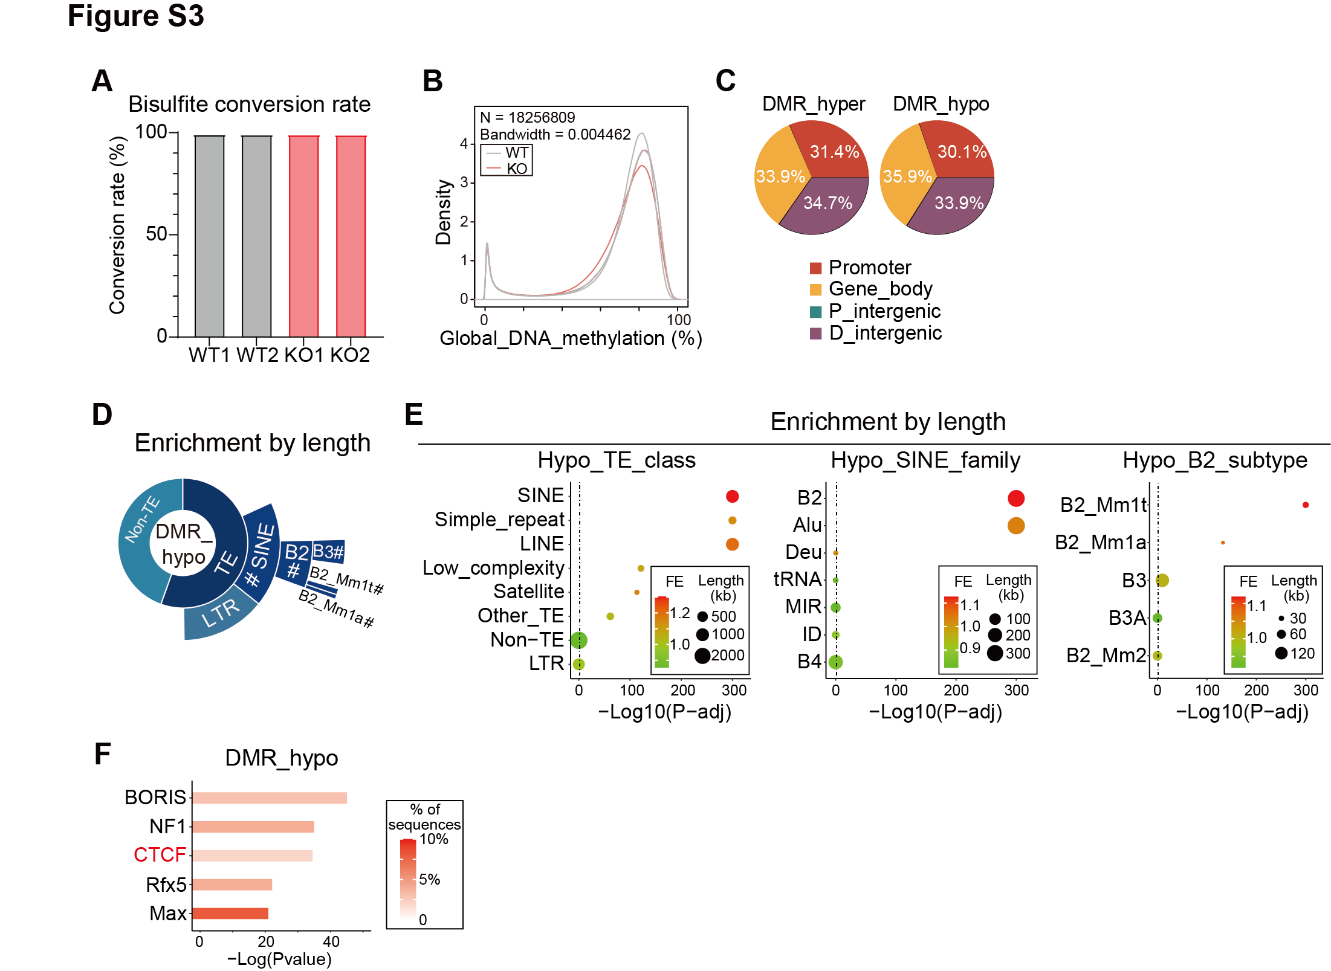


**Fig. S3: DNA methylation participated in SETDB1-mediated repression of SINE_B2. (A)** Bisulfite conversion rate of whole-genome bisulfite sequencing (WGBS) samples. **(B)** Global DNA methylation distribution of WT & KO NPC. **(C)** Genomic distribution of significantly hypermethylated (DMR_hyper, left) and hypomethylated (DMR_hypo, right) regions. **(D)** Annotation enrichment of DMR_hypo by accumulative length. **(E)** “TE_class” (left), “SINE_family” (middle) and “B2_subtype” (right) annotation enrichment of DMR_hypo by accumulative length. Fisher’s exact test, B-H adjusted, #: P-adj. < 0.0001.Dotted linesindicate P-adj. = 0.05. **(F)** Top 5 enriched Homer known motifs of DMR_hypo. Note CTCF motif was significantly enriched.


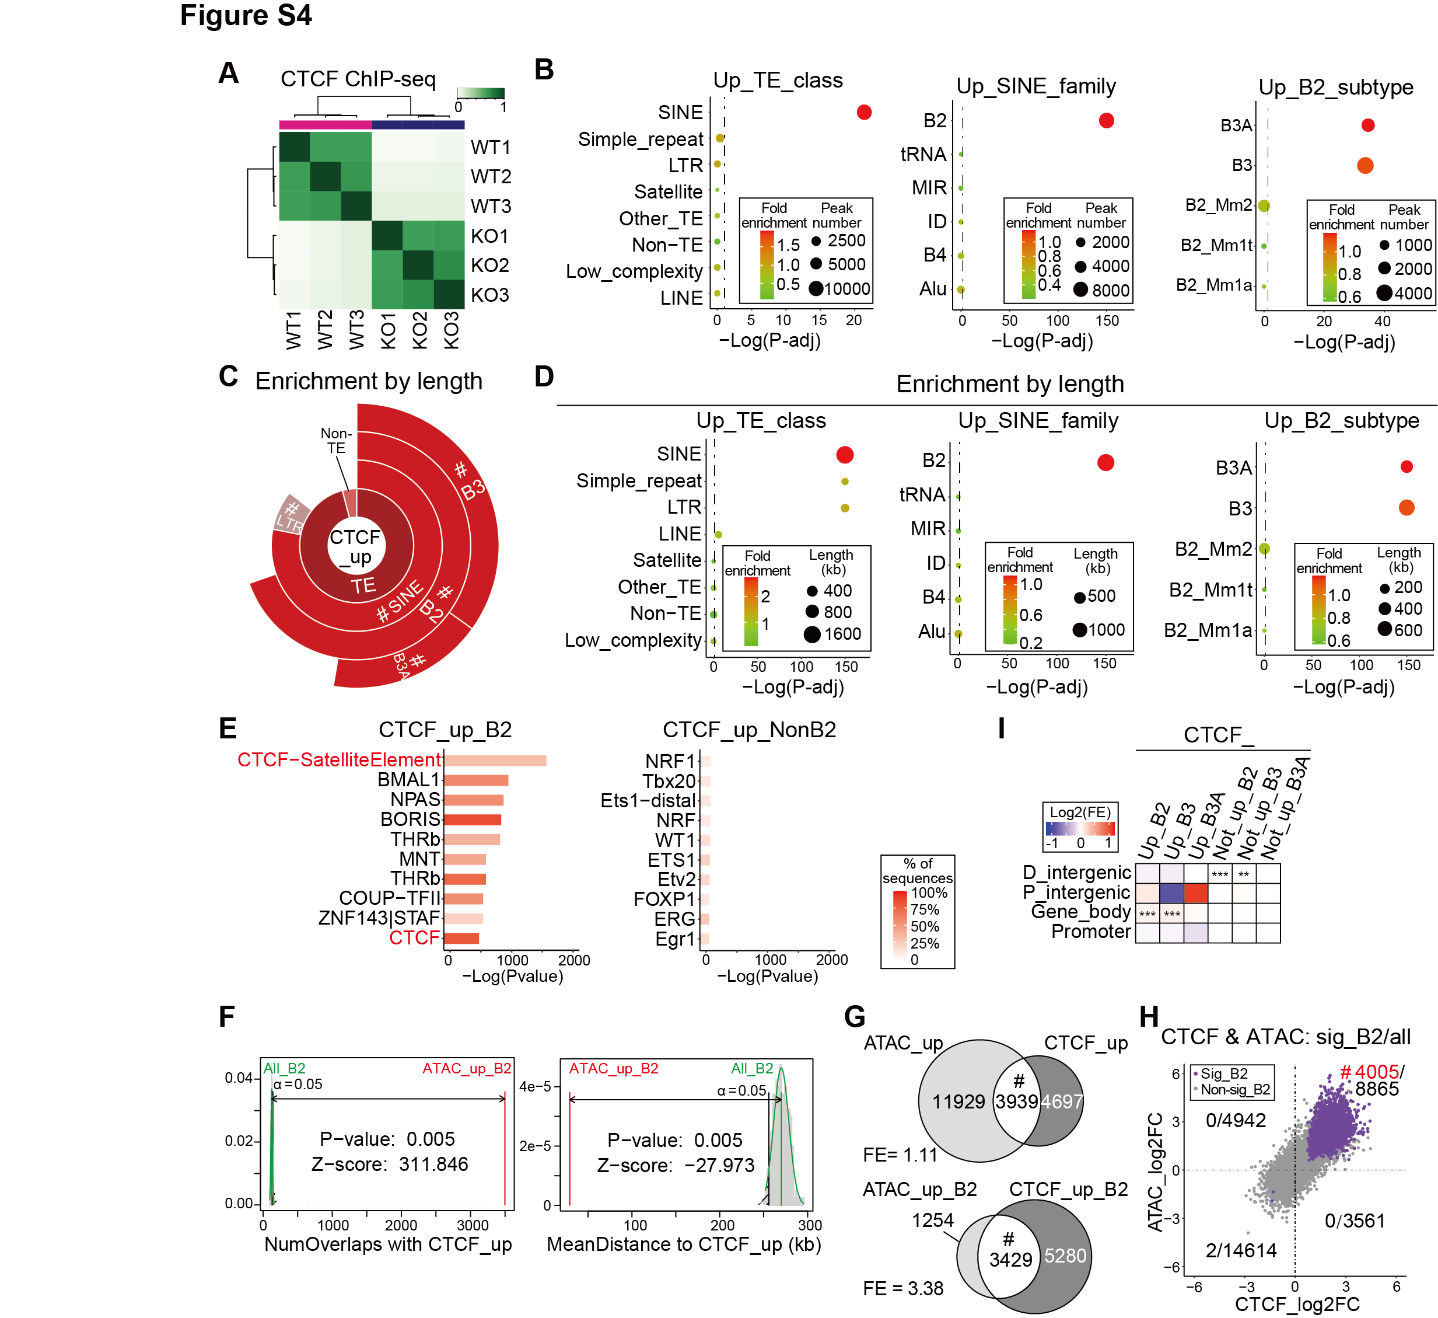


**Fig. S4: SETDB1 constrained excessive CTCF binding at SINE_B2. (A)** Correlation heatmap of CTCF ChIP-seq (CTCF) samples derived from WT and KO NPC. **(B)** “TE_class” (left), “SINE_family” (middle) and “B2_subtype” (right) enrichment of up-regulated CTCF peaks (“CTCF_up”) by number. Fisher’s exact test, B-H adjusted, #: P-adj. < 0.0001. Dotted linesindicate P-adj. = 0.05. **(C)** Annotation enrichment of CTCF_up by accumulative length. **(D)** “TE_class” (left), “SINE_family” (middle) and “B2_name” (right) annotation enrichment of CTCF_up by accumulative length. Fisher’s exact test, B-H adjusted, #: P-adj. < 0.0001.Dotted linesindicate P-adj. = 0.05. **(E)** Top 10 enriched Homer known motifs of CTCF_up overlapping B2 elements (“CTCF_up_B2”, left) and CTCF_up not overlapping B2 (“CTCF_up_NonB2”, right). Enrichment analysis was conducted against the background of all CTCF peaks. Note CTCF-SatelliteElement and CTCF motifs were only enriched for CTCF_up_B2. **(F)** Number of overlaps between ATAC_up_B2 and CTCF_up (left), and mean distance from ATAC_up_B2 to CTCF_up (right). Permutation tests were conducted against all B2 loci (All_B2, green). **(G)** Overlap between ATAC_up & CTCF_up (top), and ATAC_up_B2 & CTCF_up_B2 (bottom). FE, fold enrichment. Fisher’s exact test, #: P-value < 0.0001. **(H)** Log2FoldChange (log2FC) of all overlapping ATAC & CTCF peaks (“all”), and significantly differential ATAC & K9 peaks overlapping B2 elements (“sig_B2”). Note sig_B2 were almost exclusively and significantly distributed in the 2nd quadrant. Sig, significant. Non_sig, non-significant. Fisher’s exact test, #: P-value < 0.0001. **(I)** Genomic distribution enrichment of B2 overlapping CTCF_up (CTCF_up_B2, including CTCF_up_B3 and CTCF_up_B3A) and B2 not overlapping CTCF_up (CTCF_not_up_B2, including CTCF_not_up_B3 and CTCF_not_up_B3A). FE, fold enrichment. Fisher’s exact test, B-H adjusted, **: P-adj. < 0.01, ***: P-adj. < 0.001.


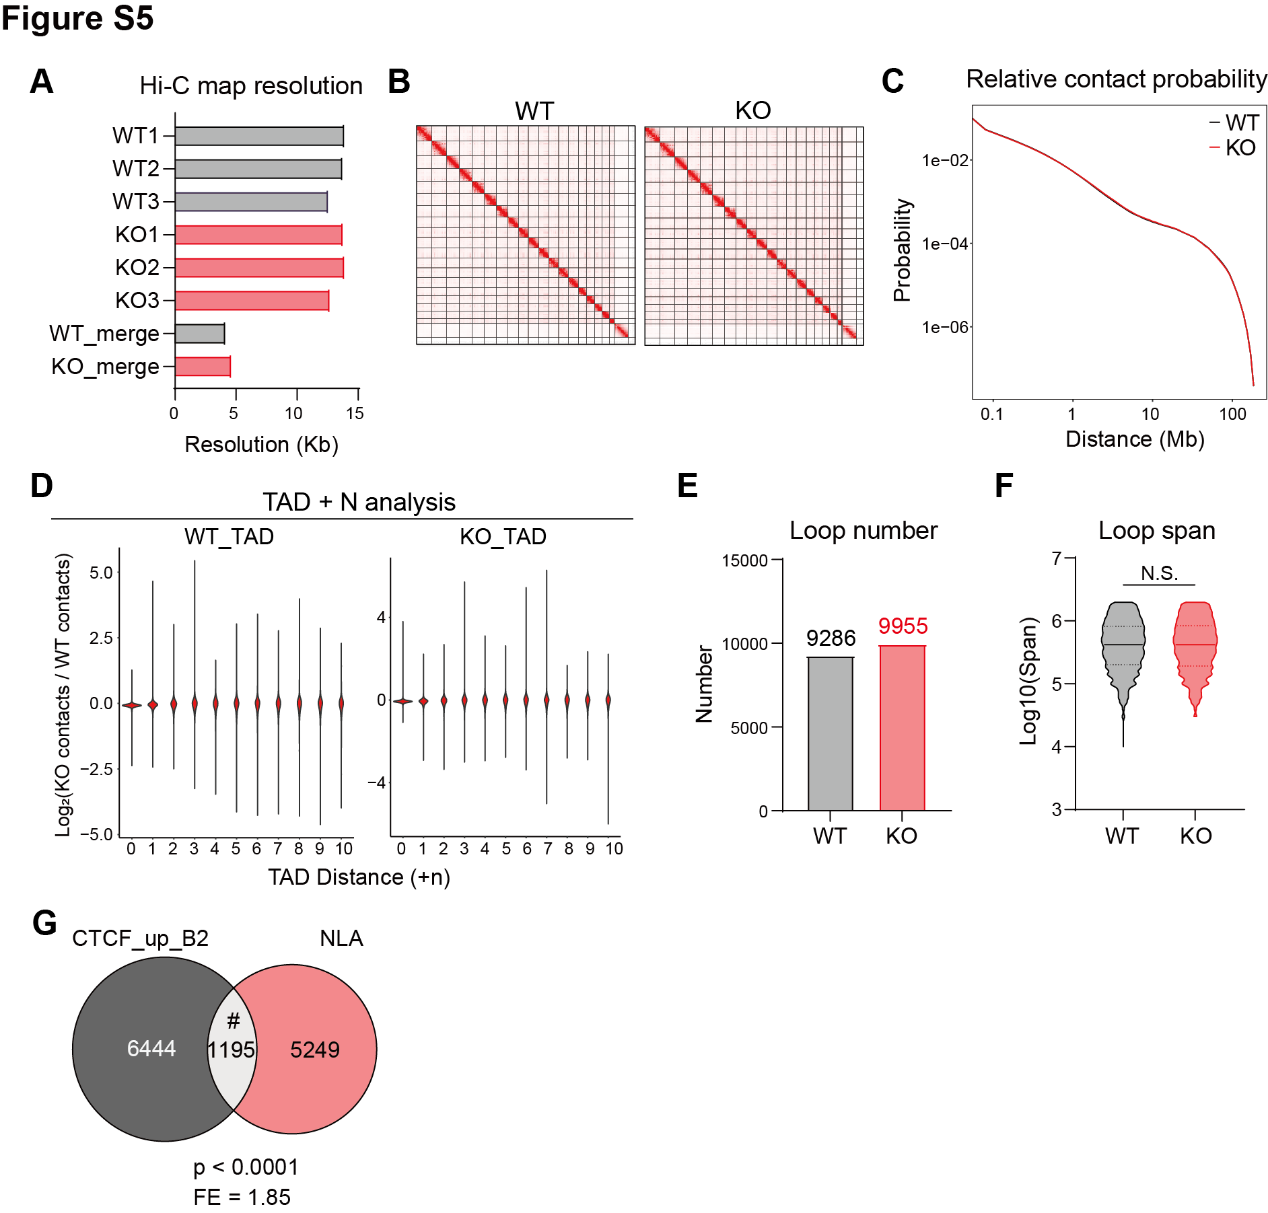


**Fig. S5: Chromatin loop formation due to increased CTCF occupancy at SINE_B2 elements. (A)** Hi-C map resolution of individual and genotype-merged Hi-C samples. **(B)** Hi-C contact maps of WT and KO NPC. **(C)** Relative contact probability genome-wide. **(D)** Differential (KO/WT) interaction density between neighboring TADs in WT TAD regions (left) and KO TAD regions (right). **(E)** The number of chromatin loops in WT and KO NPC. **(F)** The span of chromatin loops in WT and KO NPC. Solid lines: medians. Dotted lines: quartiles.Mann-Whitney U test, N.S., non-significant. **(G)** Overlap between CTCF_up_B2 and “new loop anchors” (NLA). Fisher’s exact test, #: P-value < 0.0001. FE, fold enrichment.


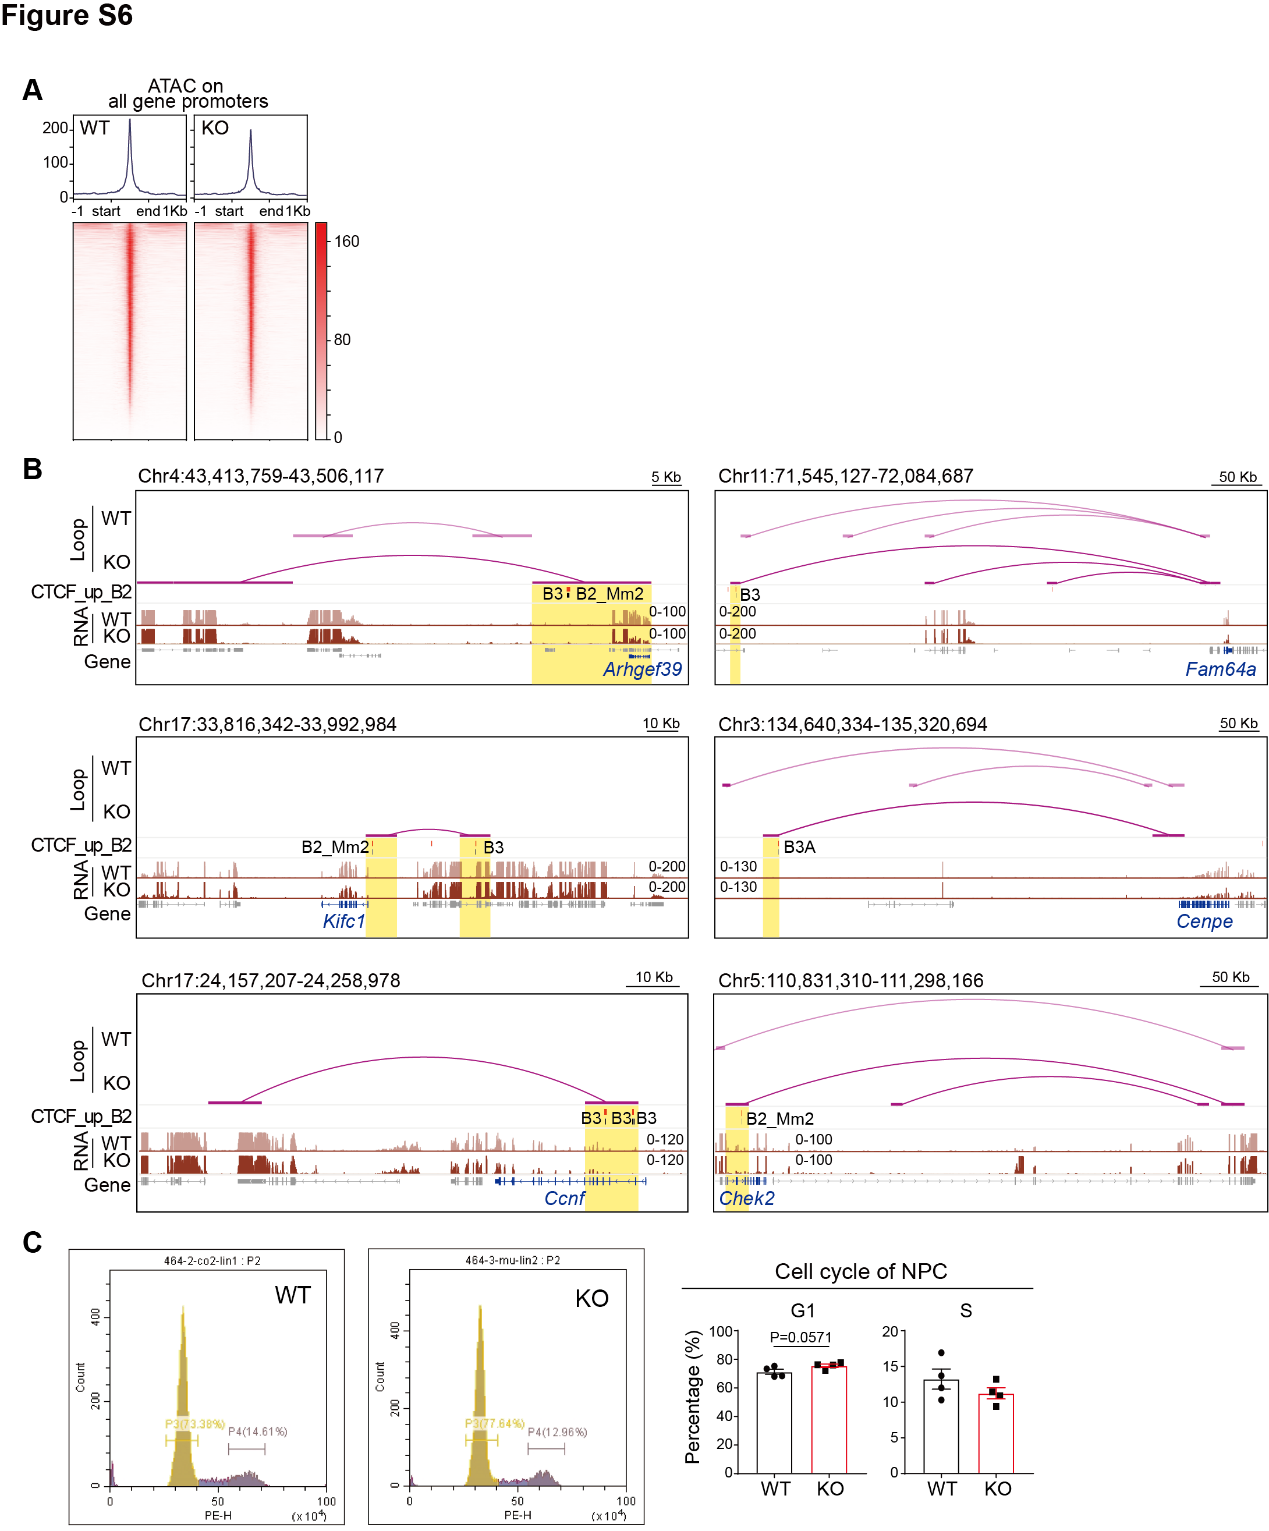


**Fig. S6: SETDB1 maintained cell cycle in NPC by restraining aberrant loop formation. (A)** ATAC-seq signal profiles on promoters of all detected genes in RNA-seq. **(B)** Examples of B2_new_loop-regulated, transcriptionally down-regulated cell cycle cluster genes (“cluster_gene” for short, gene name and gene body in blue). Yellow shades indicate CTCF_up_B2-mediated new loop anchors. The overlapping SINE_B2 element was marked with black lines and subtypes. **(C)** Count and propidium iodide fluorescence distribution of WT and KO NPC analyzed by flow cytometry (left). Bar plots displayed the percentages of NPC in G1 and S phase, respectively (right). Mean ± SEM, Mann-Whitney U test.
